# Supplementary material for: Increased inflammatory signature in myeloid cells of non-small cell lung cancer patients with high clonal hematopoiesis burden
Source: eLife. 2024 Dec 6;13:RP96951. doi: 10.7554/eLife.96951 (PMC11623926; doi:10.7554/eLife.96951)
Supplement: Supplementary file 1. — (a) Clinical information of non-small cell lung cancer (NSCLC) cohort with immune checkpoint inhibitor (ICI) treatment. (b) Information of control samples. (c) List of clonal hematopoiesis of indeterminate potential (CHIP) variants detected from targeted sequencing. (d) List of CHIP variants detected from whole exome sequencing (WES). (e) Identified DEGs from annotated clusters of single-cell RNA sequencing (scRNA-seq). (f) Gene set enrichment analysis (GSEA) results related to myeloid lineage, related to Figure 3C. (g) Identified DEGs from each cluster by variant allele frequency (VAF) bin. (h) Gene-module annotation from weighted correlation network analysis (WGCNA). [file elife-96951-supp1.xlsx]

## Sheet: supplementary file 1a
# Supplementary file 1a. Clinical information of NSCLC cohort with ICI treatment
ID	panel	age	response_to_ICI	sex	pathology	smoking_status	Panel_Seq_beforeICI	Panel_Seq_afterICI	scRNA-seq	CHIP_beforeICI	CHIP_afterICI	CHIP_MaxAF_beforeICI	CHIP_MaxAF_afterICI
CHIP001	panel	62	PR	M	LUAD	current-smoker	TRUE	TRUE	TRUE	FALSE	FALSE	0	0
CHIP002	panel	62	PR	M	LUAD	current-smoker	TRUE	TRUE	TRUE	TRUE	TRUE	0.026	0.03
CHIP003	panel	70	PR	M	Other	ex-smoker	TRUE	TRUE	TRUE	TRUE	TRUE	0.066	0.071
CHIP004	panel	66	PR	M	LUAD	ex-smoker	TRUE	TRUE	TRUE	FALSE	FALSE	0	0
CHIP005	panel	60	PR	M	LUSC	ex-smoker	TRUE	TRUE	TRUE	FALSE	FALSE	0	0
CHIP006	panel	62	PR	M	LUSC	ex-smoker	TRUE	TRUE	TRUE	TRUE	TRUE	0.058	0.057
CHIP007	panel	54	PR	M	LUAD	current-smoker	TRUE	TRUE	TRUE	TRUE	TRUE	0.033	0.03
CHIP008	panel	52	PR	F	LUAD	never	TRUE	TRUE	FALSE	FALSE	FALSE	0	0
CHIP009	panel	64	PD	M	LUSC	ex-smoker	TRUE	TRUE	TRUE	TRUE	TRUE	0.076	0.134
CHIP010	panel	71	PD	M	LUSC	ex-smoker	TRUE	TRUE	TRUE	TRUE	TRUE	0.092	0.115
CHIP011	panel	68	PD	M	LUAD	ex-smoker	TRUE	TRUE	TRUE	TRUE	TRUE	0.068	0.042
CHIP012	panel	67	PD	M	LUAD	ex-smoker	TRUE	TRUE	FALSE	FALSE	TRUE	0	0.021
CHIP013	panel	67	PD	M	LUSC	ex-smoker	TRUE	TRUE	TRUE	FALSE	FALSE	0	0
CHIP014	panel	68	PD	M	LUSC	current-smoker	TRUE	TRUE	TRUE	FALSE	FALSE	0	0
CHIP015	panel	61	PD	M	LUSC	current-smoker	TRUE	TRUE	TRUE	TRUE	TRUE	0.024	0.027
CHIP016	panel	79	PD	M	LUSC	ex-smoker	TRUE	TRUE	TRUE	FALSE	FALSE	0	0
CHIP017	panel	77	PD	M	LUSC	ex-smoker	TRUE	TRUE	TRUE	TRUE	TRUE	0.126	0.17
CHIP018	panel	61	PD	F	LUSC	never	TRUE	TRUE	TRUE	FALSE	TRUE	0	0.031
CHIP019	panel	72	PR	M	LUAD	ex-smoker	TRUE	TRUE	FALSE	FALSE	FALSE	0	0
CHIP020	panel	74	PR	M	LUAD	ex-smoker	TRUE	TRUE	FALSE	FALSE	FALSE	0	0
CHIP021	panel	60	PD	M	LUSC	current-smoker	TRUE	TRUE	FALSE	TRUE	TRUE	0.177	0.123
CHIP022	panel	60	PD	M	LUAD	current-smoker	TRUE	TRUE	FALSE	FALSE	FALSE	0	0
CHIP023	panel	67	SD	M	LUAD	ex-smoker	TRUE	TRUE	FALSE	FALSE	TRUE	0	0.084
CHIP024	panel	55	PD	F	LUAD	ex-smoker	TRUE	TRUE	FALSE	TRUE	TRUE	0.065	0.04
CHIP025	panel	74	PD	M	LUAD	current-smoker	TRUE	TRUE	FALSE	TRUE	TRUE	0.099	0.107
CHIP026	panel	70	PR	M	LUAD	ex-smoker	TRUE	TRUE	FALSE	TRUE	TRUE	0.038	0.053
CHIP027	panel	80	SD	M	LUSC	ex-smoker	TRUE	TRUE	FALSE	TRUE	TRUE	0.023	0.02
CHIP028	panel	61	PR	M	LUAD	never	TRUE	TRUE	FALSE	FALSE	FALSE	0	0
CHIP029	panel	55	PD	M	LUSC	current-smoker	TRUE	TRUE	FALSE	FALSE	FALSE	0	0
CHIP030	panel	60	PD	M	LUAD	ex-smoker	TRUE	TRUE	TRUE	FALSE	FALSE	0	0
CHIP031	panel	72	PD	M	LUAD	ex-smoker	TRUE	TRUE	TRUE	TRUE	FALSE	0.02	0
CHIP032	panel	63	PD	M	LUSC	ex-smoker	TRUE	TRUE	TRUE	FALSE	FALSE	0	0
CHIP033	panel	61	PR	M	LUAD	current-smoker	TRUE	TRUE	TRUE	TRUE	TRUE	0.073	0.068
CHIP034	panel	66	PR	M	LUAD	current-smoker	TRUE	TRUE	TRUE	FALSE	FALSE	0	0
CHIP035	panel	56	PD	M	LUAD	ex-smoker	TRUE	TRUE	TRUE	TRUE	TRUE	0.044	0.022
CHIP036	panel	58	PD	M	LUAD	current-smoker	TRUE	TRUE	TRUE	FALSE	FALSE	0	0
CHIP037	panel	73	PR	M	LUSC	ex-smoker	TRUE	TRUE	TRUE	FALSE	FALSE	0	0
CHIP038	panel	67	PD	M	LUAD	ex-smoker	TRUE	TRUE	TRUE	FALSE	FALSE	0	0
CHIP039	panel	64	PD	M	LUAD	ex-smoker	TRUE	TRUE	TRUE	TRUE	TRUE	0.033	0.047
CHIP040	panel	60	PD	M	LUAD	ex-smoker	TRUE	TRUE	TRUE	FALSE	FALSE	0	0
CHIP041	panel	64	PR	M	LUAD	current-smoker	TRUE	TRUE	TRUE	FALSE	FALSE	0	0
CHIP042	panel	69	PR	M	LUSC	current-smoker	TRUE	TRUE	TRUE	FALSE	FALSE	0	0
CHIP043	panel	71	PD	M	LUSC	ex-smoker	TRUE	TRUE	TRUE	TRUE	FALSE	0.287	0
CHIP044	panel	66	PD	M	LUSC	current-smoker	TRUE	TRUE	TRUE	TRUE	FALSE	0.024	0
CHIP045	panel	70	PR	M	LUSC	ex-smoker	TRUE	TRUE	TRUE	TRUE	TRUE	0.034	0.029
CHIP046	panel	70	PD	F	LUSC	current-smoker	TRUE	TRUE	TRUE	FALSE	TRUE	0	0.028
CHIP047	panel	61	PD	M	LUSC	ex-smoker	TRUE	TRUE	TRUE	FALSE	FALSE	0	0
CHIP048	panel	71	PR	M	LUAD	current-smoker	TRUE	TRUE	TRUE	FALSE	FALSE	0	0
CHIP049	panel	71	PD	M	LUAD	ex-smoker	TRUE	TRUE	TRUE	FALSE	FALSE	0	0
CHIP050	panel	59	PD	M	LUSC	current-smoker	TRUE	TRUE	TRUE	TRUE	TRUE	0.259	0.166
CHIP051	panel	57	PD	M	LUAD	ex-smoker	TRUE	TRUE	TRUE	FALSE	FALSE	0	0
CHIP052	panel	73	PR	M	LUAD	ex-smoker	TRUE	TRUE	TRUE	FALSE	FALSE	0	0
CHIP053	panel	64	PR	M	LUSC	current-smoker	TRUE	TRUE	TRUE	TRUE	TRUE	0.035	0.031
CHIP054	panel	65	PR	M	LUAD	current-smoker	TRUE	TRUE	TRUE	TRUE	TRUE	0.041	0.042
CHIP055	panel	64	PR	F	LUAD	never	TRUE	TRUE	TRUE	FALSE	FALSE	0	0
CHIP056	panel	78	PD	M	LUAD	ex-smoker	TRUE	TRUE	TRUE	TRUE	TRUE	0.031	0.05
CHIP057	panel	68	PD	M	LUAD	ex-smoker	TRUE	TRUE	TRUE	TRUE	FALSE	0.024	0
CHIP058	panel	63	PD	M	LUSC	current-smoker	TRUE	TRUE	TRUE	FALSE	FALSE	0	0
CHIP059	panel	59	PD	F	LUAD	never	TRUE	TRUE	TRUE	FALSE	FALSE	0	0
CHIP060	panel	82	PR	M	LUSC	ex-smoker	TRUE	TRUE	TRUE	FALSE	TRUE	0	0.021
CHIP061	panel	67	PD	M	LUSC	current-smoker	TRUE	TRUE	TRUE	FALSE	FALSE	0	0
CHIP062	panel	73	PD	M	Other	ex-smoker	TRUE	TRUE	TRUE	FALSE	FALSE	0	0
CHIP063	panel	67	PD	M	LUAD	current-smoker	TRUE	TRUE	TRUE	TRUE	TRUE	0.027	0.045
CHIP064	panel	72	PD	M	Other	ex-smoker	TRUE	TRUE	TRUE	TRUE	TRUE	0.048	0.029
CHIP065	panel	61	PR	M	Other	ex-smoker	TRUE	TRUE	TRUE	FALSE	FALSE	0	0
CHIP066	panel	68	PR	M	LUAD	ex-smoker	TRUE	TRUE	FALSE	FALSE	TRUE	0	0.025
CHIP067	panel	79	PR	M	Other	current-smoker	TRUE	TRUE	TRUE	TRUE	TRUE	0.047	0.045
CHIP068	panel	74	PD	M	Other	never	TRUE	TRUE	TRUE	FALSE	TRUE	0	0.022
CHIP069	panel	70	PR	M	Other	ex-smoker	TRUE	TRUE	TRUE	FALSE	TRUE	0	0.02
CHIP070	panel	60	PD	M	LUAD	current-smoker	TRUE	TRUE	TRUE	FALSE	TRUE	0	0.032
CHIP071	panel	82	PR	M	LUAD	ex-smoker	TRUE	TRUE	TRUE	TRUE	TRUE	0.034	0.043
CHIP072	panel	69	PD	M	LUSC	ex-smoker	TRUE	TRUE	TRUE	FALSE	FALSE	0	0
CHIP073	panel	83	PR	M	LUAD	ex-smoker	TRUE	TRUE	TRUE	TRUE	TRUE	0.083	0.082
CHIP074	panel	79	PR	M	LUSC	current-smoker	TRUE	TRUE	TRUE	TRUE	TRUE	0.174	0.159
CHIP075	panel	59	PD	M	LUSC	current-smoker	TRUE	TRUE	TRUE	FALSE	FALSE	0	0
CHIP076	panel	76	PD	M	LUAD	ex-smoker	TRUE	TRUE	TRUE	FALSE	TRUE	0	0.021
CHIP077	panel	67	PR	M	LUAD	ex-smoker	TRUE	TRUE	FALSE	TRUE	TRUE	0.025	0.371
CHIP078	panel	61	PR	F	LUAD	never	TRUE	TRUE	FALSE	FALSE	FALSE	0	0
CHIP079	panel	67	PR	M	LUAD	current-smoker	TRUE	TRUE	FALSE	FALSE	FALSE	0	0
CHIP080	panel	58	PR	M	LUAD	ex-smoker	TRUE	TRUE	FALSE	TRUE	TRUE	0.046	0.061
CHIP081	panel	68	PR	M	LUSC	ex-smoker	TRUE	TRUE	FALSE	TRUE	TRUE	0.188	0.174
CHIP082	panel	77	PR	M	LUSC	ex-smoker	TRUE	TRUE	FALSE	FALSE	FALSE	0	0
CHIP083	panel	56	PD	M	LUSC	current-smoker	TRUE	TRUE	FALSE	FALSE	FALSE	0	0
CHIP084	panel	62	PR	M	LUSC	current-smoker	TRUE	TRUE	FALSE	FALSE	FALSE	0	0
CHIP085	panel	68	PD	M	LUAD	ex-smoker	TRUE	TRUE	FALSE	FALSE	FALSE	0	0
CHIP086	panel	60	PR	F	LUAD	ex-smoker	TRUE	TRUE	FALSE	FALSE	FALSE	0	0
CHIP087	panel	73	PR	M	LUAD	ex-smoker	TRUE	TRUE	FALSE	TRUE	TRUE	0.021	0.023
CHIP088	panel	66	PR	F	LUSC	ex-smoker	TRUE	FALSE	FALSE	TRUE	NA	0.086	NA
CHIP089	panel	60	PR	M	LUSC	current-smoker	TRUE	FALSE	FALSE	FALSE	NA	0	NA
CHIP090	panel	82	PR	M	LUSC	never	TRUE	FALSE	FALSE	TRUE	NA	0.177	NA
CHIP091	panel	60	PR	M	LUSC	current-smoker	TRUE	FALSE	FALSE	TRUE	NA	0.025	NA
CHIP092	panel	63	PR	M	LUSC	current-smoker	TRUE	FALSE	FALSE	FALSE	NA	0	NA
CHIP093	panel	79	PR	M	LUAD	ex-smoker	TRUE	TRUE	FALSE	TRUE	FALSE	0.026	0
CHIP094	panel	76	PR	M	LUSC	ex-smoker	TRUE	FALSE	FALSE	TRUE	NA	0.22	NA
CHIP095	panel	77	PR	M	LUAD	never	TRUE	TRUE	FALSE	TRUE	FALSE	0.021	0
CHIP096	panel	61	PR	M	LUSC	ex-smoker	TRUE	FALSE	FALSE	FALSE	NA	0	NA
CHIP097	panel	65	PR	M	LUSC	current-smoker	TRUE	FALSE	FALSE	FALSE	NA	0	NA
CHIP098	panel	67	PR	M	LUAD	current-smoker	TRUE	FALSE	FALSE	TRUE	NA	0.044	NA
CHIP099	panel	68	PR	M	LUSC	current-smoker	TRUE	TRUE	FALSE	TRUE	TRUE	0.069	0.065
CHIP100	panel	52	PR	M	LUSC	current-smoker	TRUE	TRUE	TRUE	FALSE	FALSE	0	0
WES1	wes	58.9	SD	M	LUAD	current-smoker	WES	FALSE	FALSE	TRUE	NA	0.068	NA
WES2	wes	58.8	PD	F	LUAD	never	WES	FALSE	FALSE	FALSE	NA	0	NA
WES3	wes	54.1	PR	F	LUAD	current-smoker	WES	FALSE	FALSE	FALSE	NA	0	NA
WES4	wes	73.9	PD	M	LUSC	ex-smoker	WES	FALSE	FALSE	FALSE	NA	0	NA
WES5	wes	77.5	PD	M	LUSC	current-smoker	WES	FALSE	FALSE	FALSE	NA	0	NA
WES6	wes	69.3	PD	M	LUAD	ex-smoker	WES	FALSE	FALSE	FALSE	NA	0	NA
WES7	wes	68.7	PD	M	LUAD	never	WES	FALSE	FALSE	FALSE	NA	0	NA
WES8	wes	65.9	PD	F	LUAD	never	WES	FALSE	FALSE	FALSE	NA	0	NA
WES9	wes	81.8	PR	M	LUAD	current-smoker	WES	FALSE	FALSE	TRUE	NA	0.039	NA
WES10	wes	66.2	PD	M	LUSC	ex-smoker	WES	FALSE	FALSE	FALSE	NA	0	NA
WES12	wes	69.3	PD	M	LUSC	ex-smoker	WES	FALSE	FALSE	FALSE	NA	0	NA
WES14	wes	62.1	PR	M	LUSC	ex-smoker	WES	FALSE	FALSE	TRUE	NA	0.025	NA
WES15	wes	76.7	PD	M	LUAD	never	WES	FALSE	FALSE	FALSE	NA	0	NA
WES16	wes	61.6	SD	M	LUAD	current-smoker	WES	FALSE	FALSE	FALSE	NA	0	NA
WES17	wes	56.4	PD	M	LUAD	current-smoker	WES	FALSE	FALSE	FALSE	NA	0	NA
WES18	wes	57.2	PD	M	LUAD	current-smoker	WES	FALSE	FALSE	FALSE	NA	0	NA
WES19	wes	61.1	PR	F	LUAD	never	WES	FALSE	FALSE	FALSE	NA	0	NA
WES20	wes	47.5	PD	F	LUAD	never	WES	FALSE	FALSE	FALSE	NA	0	NA
WES22	wes	59.2	PR	M	LUAD	current-smoker	WES	FALSE	FALSE	FALSE	NA	0	NA
WES23	wes	52.3	SD	M	LUAD	ex-smoker	WES	FALSE	FALSE	FALSE	NA	0	NA
WES24	wes	59.2	PR	F	LUSC	never	WES	FALSE	FALSE	FALSE	NA	0	NA
WES25	wes	61.8	SD	M	LUAD	never	WES	FALSE	FALSE	FALSE	NA	0	NA
WES26	wes	66.3	PD	M	LUSC	ex-smoker	WES	FALSE	FALSE	FALSE	NA	0	NA
WES27	wes	71.7	PD	M	LUSC	ex-smoker	WES	FALSE	FALSE	TRUE	NA	0.026	NA
WES28	wes	60.6	SD	F	LUAD	never	WES	FALSE	FALSE	TRUE	NA	0.191	NA
WES29	wes	64	PD	M	LUAD	current-smoker	WES	FALSE	FALSE	FALSE	NA	0	NA
WES30	wes	65.7	PD	M	LUAD	current-smoker	WES	FALSE	FALSE	FALSE	NA	0	NA
WES31	wes	51.1	SD	M	LUAD	current-smoker	WES	FALSE	FALSE	FALSE	NA	0	NA
WES32	wes	57.5	PD	F	LUAD	never	WES	FALSE	FALSE	FALSE	NA	0	NA
WES33	wes	48	PR	M	LUAD	current-smoker	WES	FALSE	FALSE	FALSE	NA	0	NA
WES34	wes	52.7	PD	F	LUAD	never	WES	FALSE	FALSE	FALSE	NA	0	NA
WES35	wes	75.2	PR	M	LUSC	current-smoker	WES	FALSE	FALSE	FALSE	NA	0	NA
WES36	wes	56.8	SD	F	LUAD	never	WES	FALSE	FALSE	TRUE	NA	0.193	NA
WES37	wes	66.4	PR	M	LUAD	ex-smoker	WES	FALSE	FALSE	FALSE	NA	0	NA
WES38	wes	80	PR	M	LUSC	never	WES	FALSE	FALSE	TRUE	NA	0.114	NA
WES39	wes	44.4	PR	M	LUAD	current-smoker	WES	FALSE	FALSE	FALSE	NA	0	NA
WES40	wes	69.6	PR	M	LUSC	current-smoker	WES	FALSE	FALSE	FALSE	NA	0	NA
WES42	wes	54.2	PR	M	LUAD	current-smoker	WES	FALSE	FALSE	FALSE	NA	0	NA
WES43	wes	65.4	PD	M	LUAD	current-smoker	WES	FALSE	FALSE	TRUE	NA	0.04	NA
WES44	wes	75.5	PR	NA	LUAD	never	WES	FALSE	FALSE	TRUE	NA	0.321	NA
WES45	wes	70.1	PD	F	LUAD	never	WES	FALSE	FALSE	FALSE	NA	0	NA
WES46	wes	52.4	PR	F	LUAD	never	WES	FALSE	FALSE	FALSE	NA	0	NA
WES47	wes	62.5	PD	F	LUSC	never	WES	FALSE	FALSE	FALSE	NA	0	NA
WES48	wes	66.1	SD	M	LUAD	ex-smoker	WES	FALSE	FALSE	FALSE	NA	0	NA
WES49	wes	61.9	PR	F	LUAD	never	WES	FALSE	FALSE	FALSE	NA	0	NA
WES50	wes	38	SD	M	LUAD	current-smoker	WES	FALSE	FALSE	FALSE	NA	0	NA
WES51	wes	58.5	PD	M	LUAD	current-smoker	WES	FALSE	FALSE	FALSE	NA	0	NA
WES52	wes	72.9	PD	M	LUAD	ex-smoker	WES	FALSE	FALSE	TRUE	NA	0.169	NA
WES53	wes	60	SD	M	LUAD	current-smoker	WES	FALSE	FALSE	FALSE	NA	0	NA
WES54	wes	33.1	PD	F	LUAD	never	WES	FALSE	FALSE	FALSE	NA	0	NA
WES55	wes	38.1	PD	M	LUAD	never	WES	FALSE	FALSE	FALSE	NA	0	NA
WES56	wes	50.8	SD	M	LUAD	current-smoker	WES	FALSE	FALSE	FALSE	NA	0	NA
WES57	wes	58.3	PR	M	LUAD	never	WES	FALSE	FALSE	FALSE	NA	0	NA
WES58	wes	68.9	PD	M	LUSC	ex-smoker	WES	FALSE	FALSE	TRUE	NA	0.036	NA
WES60	wes	73.8	PR	M	LUSC	current-smoker	WES	FALSE	FALSE	FALSE	NA	0	NA
WES61	wes	70.8	SD	M	LUSC	current-smoker	WES	FALSE	FALSE	FALSE	NA	0	NA
WES62	wes	62.3	PR	M	LUSC	current-smoker	WES	FALSE	FALSE	FALSE	NA	0	NA
WES63	wes	59.5	PR	F	LUAD	current-smoker	WES	FALSE	FALSE	FALSE	NA	0	NA
WES64	wes	76.3	PR	F	LUAD	never	WES	FALSE	FALSE	FALSE	NA	0	NA
WES65	wes	68.6	PD	M	LUAD	ex-smoker	WES	FALSE	FALSE	FALSE	NA	0	NA
WES66	wes	62.1	PR	M	LUAD	ex-smoker	WES	FALSE	FALSE	TRUE	NA	0.065	NA
WES67	wes	65.4	SD	M	LUSC	current-smoker	WES	FALSE	FALSE	FALSE	NA	0	NA
WES68	wes	70.5	PD	M	LUSC	ex-smoker	WES	FALSE	FALSE	FALSE	NA	0	NA
WES69	wes	63.3	PD	M	LUSC	ex-smoker	WES	FALSE	FALSE	TRUE	NA	0.028	NA
WES70	wes	59.2	CR	M	LUAD	current-smoker	WES	FALSE	FALSE	FALSE	NA	0	NA
WES71	wes	54	PD	F	LUAD	never	WES	FALSE	FALSE	FALSE	NA	0	NA
WES72	wes	57	PD	M	LUAD	ex-smoker	WES	FALSE	FALSE	FALSE	NA	0	NA
WES73	wes	64.1	PD	M	LUAD	ex-smoker	WES	FALSE	FALSE	FALSE	NA	0	NA
WES74	wes	65.6	PR	M	LUAD	ex-smoker	WES	FALSE	FALSE	FALSE	NA	0	NA
WES75	wes	79.8	PD	M	LUAD	ex-smoker	WES	FALSE	FALSE	TRUE	NA	0.318	NA
WES76	wes	51.4	PR	M	LUAD	ex-smoker	WES	FALSE	FALSE	FALSE	NA	0	NA
WES79	wes	63.2	SD	M	LUAD	current-smoker	WES	FALSE	FALSE	FALSE	NA	0	NA
WES80	wes	62.1	PD	F	LUSC	never	WES	FALSE	FALSE	TRUE	NA	0.235	NA
WES81	wes	57.4	PD	M	LUSC	current-smoker	WES	FALSE	FALSE	TRUE	NA	0.054	NA
WES82	wes	55	PD	M	LUAD	current-smoker	WES	FALSE	FALSE	TRUE	NA	0.056	NA
WES83	wes	54.9	PD	F	LUSC	never	WES	FALSE	FALSE	FALSE	NA	0	NA
WES84	wes	84.5	SD	M	LUSC	current-smoker	WES	FALSE	FALSE	FALSE	NA	0	NA
WES85	wes	60.4	PD	M	LUAD	current-smoker	WES	FALSE	FALSE	FALSE	NA	0	NA
WES86	wes	61.3	PD	M	LUSC	current-smoker	WES	FALSE	FALSE	TRUE	NA	0.033	NA
WES87	wes	66.9	PR	M	LUSC	current-smoker	WES	FALSE	FALSE	FALSE	NA	0	NA
WES88	wes	45.5	PD	F	LUSC	never	WES	FALSE	FALSE	FALSE	NA	0	NA
WES89	wes	65.1	PR	M	LUSC	current-smoker	WES	FALSE	FALSE	TRUE	NA	0.033	NA
WES90	wes	68.5	CR	F	LUAD	never	WES	FALSE	FALSE	FALSE	NA	0	NA
WES91	wes	74.4	PD	M	LUAD	never	WES	FALSE	FALSE	FALSE	NA	0	NA
WES92	wes	48.9	PR	M	LUSC	current-smoker	WES	FALSE	FALSE	FALSE	NA	0	NA
WES94	wes	64.4	SD	M	LUSC	current-smoker	WES	FALSE	FALSE	TRUE	NA	0.75	NA
WES95	wes	59.5	PR	M	LUAD	current-smoker	WES	FALSE	FALSE	FALSE	NA	0	NA
WES96	wes	65.8	PD	M	LUAD	current-smoker	WES	FALSE	FALSE	TRUE	NA	0.05	NA
WES97	wes	56.8	PD	M	LUAD	ex-smoker	WES	FALSE	FALSE	FALSE	NA	0	NA
WES98	wes	73.2	SD	M	LUAD	ex-smoker	WES	FALSE	FALSE	FALSE	NA	0	NA
WES100	wes	NA	PR	NA	LUSC	current-smoker	WES	FALSE	FALSE	FALSE	NA	0	NA
WES101	wes	NA	PR	NA	LUSC	current-smoker	WES	FALSE	FALSE	TRUE	NA	0.087	NA
WES103	wes	50.7	SD	M	LUAD	ex-smoker	WES	FALSE	FALSE	FALSE	NA	0	NA
WES104	wes	68	PD	M	LUAD	current-smoker	WES	FALSE	FALSE	TRUE	NA	0.053	NA
WES105	wes	72.6	PR	M	LUSC	current-smoker	WES	FALSE	FALSE	TRUE	NA	0.134	NA
WES106	wes	58.8	PD	M	LUSC	current-smoker	WES	FALSE	FALSE	TRUE	NA	0.077	NA
WES107	wes	65.8	PR	F	LUAD	never	WES	FALSE	FALSE	FALSE	NA	0	NA
WES108	wes	55	SD	M	LUSC	current-smoker	WES	FALSE	FALSE	FALSE	NA	0	NA
WES109	wes	65.6	PD	F	LUAD	never	WES	FALSE	FALSE	TRUE	NA	0.288	NA
WES110	wes	59.2	SD	M	LUSC	ex-smoker	WES	FALSE	FALSE	FALSE	NA	0	NA
WES111	wes	74.4	PR	M	LUAD	current-smoker	WES	FALSE	FALSE	FALSE	NA	0	NA
WES112	wes	69.2	SD	M	LUAD	current-smoker	WES	FALSE	FALSE	FALSE	NA	0	NA
WES113	wes	51.9	PR	M	LUAD	current-smoker	WES	FALSE	FALSE	FALSE	NA	0	NA
WES114	wes	63.6	SD	F	LUAD	never	WES	FALSE	FALSE	FALSE	NA	0	NA
WES115	wes	61	SD	M	LUSC	ex-smoker	WES	FALSE	FALSE	FALSE	NA	0	NA
WES116	wes	42.8	PD	M	LUAD	never	WES	FALSE	FALSE	TRUE	NA	0.073	NA
WES117	wes	67.1	PR	M	LUAD	ex-smoker	WES	FALSE	FALSE	FALSE	NA	0	NA
WES118	wes	60.7	SD	M	LUAD	ex-smoker	WES	FALSE	FALSE	FALSE	NA	0	NA
WES119	wes	67.7	CR	M	LUSC	current-smoker	WES	FALSE	FALSE	TRUE	NA	0.052	NA
WES120	wes	62.5	SD	M	LUSC	current-smoker	WES	FALSE	FALSE	FALSE	NA	0	NA
WES121	wes	61	SD	M	LUAD	current-smoker	WES	FALSE	FALSE	FALSE	NA	0	NA
WES122	wes	63.2	SD	F	LUAD	never	WES	FALSE	FALSE	FALSE	NA	0	NA
WES123	wes	44.8	SD	M	LUSC	current-smoker	WES	FALSE	FALSE	FALSE	NA	0	NA
WES124	wes	66.1	PD	M	LUAD	current-smoker	WES	FALSE	FALSE	FALSE	NA	0	NA
WES125	wes	71.2	PD	M	LUAD	current-smoker	WES	FALSE	FALSE	FALSE	NA	0	NA
WES126	wes	75.4	PD	M	LUAD	current-smoker	WES	FALSE	FALSE	FALSE	NA	0	NA
WES127	wes	47	PD	F	LUSC	never	WES	FALSE	FALSE	FALSE	NA	0	NA
WES128	wes	44.4	PD	M	LUSC	ex-smoker	WES	FALSE	FALSE	TRUE	NA	0.074	NA
WES129	wes	72.8	PD	M	LUAD	ex-smoker	WES	FALSE	FALSE	FALSE	NA	0	NA
WES130	wes	63.8	SD	M	LUSC	ex-smoker	WES	FALSE	FALSE	TRUE	NA	0.069	NA
WES131	wes	81.6	PR	F	LUAD	never	WES	FALSE	FALSE	FALSE	NA	0	NA
WES132	wes	60.8	SD	M	LUAD	current-smoker	WES	FALSE	FALSE	TRUE	NA	0.056	NA
WES133	wes	56.9	PR	M	LUAD	never	WES	FALSE	FALSE	FALSE	NA	0	NA
WES134	wes	68.3	PD	M	LUAD	never	WES	FALSE	FALSE	FALSE	NA	0	NA
WES135	wes	50.7	SD	F	LUAD	never	WES	FALSE	FALSE	FALSE	NA	0	NA
WES136	wes	62.6	SD	F	LUSC	never	WES	FALSE	FALSE	FALSE	NA	0	NA
WES137	wes	57.3	PR	M	LUAD	current-smoker	WES	FALSE	FALSE	FALSE	NA	0	NA
WES138	wes	80.2	PR	M	LUSC	current-smoker	WES	FALSE	FALSE	TRUE	NA	0.156	NA
WES140	wes	63.9	PD	M	LUSC	current-smoker	WES	FALSE	FALSE	FALSE	NA	0	NA
WES141	wes	57.3	SD	M	LUAD	current-smoker	WES	FALSE	FALSE	FALSE	NA	0	NA
WES142	wes	61.8	PR	F	LUAD	never	WES	FALSE	FALSE	TRUE	NA	0.122	NA
WES143	wes	72.4	PR	F	LUAD	never	WES	FALSE	FALSE	FALSE	NA	0	NA
WES144	wes	51.5	PR	F	LUAD	never	WES	FALSE	FALSE	TRUE	NA	0.05	NA
WES145	wes	39.6	SD	M	LUAD	ex-smoker	WES	FALSE	FALSE	FALSE	NA	0	NA
WES146	wes	64.2	SD	M	LUSC	ex-smoker	WES	FALSE	FALSE	FALSE	NA	0	NA
WES147	wes	50.5	PR	M	LUAD	current-smoker	WES	FALSE	FALSE	FALSE	NA	0	NA
WES148	wes	48.7	SD	F	LUAD	never	WES	FALSE	FALSE	TRUE	NA	0.049	NA
WES149	wes	74.3	PD	M	LUAD	ex-smoker	WES	FALSE	FALSE	TRUE	NA	0.034	NA
WES150	wes	53.1	SD	F	LUAD	never	WES	FALSE	FALSE	FALSE	NA	0	NA
WES151	wes	59.8	PD	F	LUAD	never	WES	FALSE	FALSE	FALSE	NA	0	NA
WES152	wes	61.1	PD	F	LUAD	never	WES	FALSE	FALSE	FALSE	NA	0	NA
WES154	wes	72.5	SD	M	LUAD	current-smoker	WES	FALSE	FALSE	FALSE	NA	0	NA
WES155	wes	59.7	SD	F	LUAD	never	WES	FALSE	FALSE	FALSE	NA	0	NA
WES156	wes	66.7	PD	M	LUAD	ex-smoker	WES	FALSE	FALSE	TRUE	NA	0.333	NA
WES157	wes	49.2	PD	F	LUAD	never	WES	FALSE	FALSE	FALSE	NA	0	NA
WES158	wes	60.9	PD	M	LUAD	ex-smoker	WES	FALSE	FALSE	FALSE	NA	0	NA
WES159	wes	55.2	PR	M	LUAD	current-smoker	WES	FALSE	FALSE	FALSE	NA	0	NA
WES160	wes	75.7	SD	M	LUSC	current-smoker	WES	FALSE	FALSE	FALSE	NA	0	NA
WES161	wes	65	PD	M	LUSC	current-smoker	WES	FALSE	FALSE	FALSE	NA	0	NA
WES162	wes	66.5	PD	F	LUAD	never	WES	FALSE	FALSE	FALSE	NA	0	NA
WES163	wes	49.9	SD	M	LUAD	ex-smoker	WES	FALSE	FALSE	FALSE	NA	0	NA
WES164	wes	49.9	PD	F	LUAD	never	WES	FALSE	FALSE	FALSE	NA	0	NA
WES165	wes	62.2	PD	F	LUAD	never	WES	FALSE	FALSE	FALSE	NA	0	NA
WES166	wes	72.7	PR	M	LUSC	ex-smoker	WES	FALSE	FALSE	FALSE	NA	0	NA
WES167	wes	59.2	PD	M	LUAD	ex-smoker	WES	FALSE	FALSE	FALSE	NA	0	NA
WES169	wes	77.9	PR	M	LUSC	ex-smoker	WES	FALSE	FALSE	FALSE	NA	0	NA
WES170	wes	75.7	PR	F	LUAD	never	WES	FALSE	FALSE	FALSE	NA	0	NA
WES171	wes	76.4	PR	M	LUAD	ex-smoker	WES	FALSE	FALSE	TRUE	NA	0.151	NA
WES172	wes	72.6	PD	F	LUAD	never	WES	FALSE	FALSE	FALSE	NA	0	NA
WES173	wes	53.9	SD	F	LUAD	never	WES	FALSE	FALSE	FALSE	NA	0	NA
WES174	wes	48.7	SD	M	LUAD	ex-smoker	WES	FALSE	FALSE	FALSE	NA	0	NA
WES175	wes	50.8	PR	M	LUAD	ex-smoker	WES	FALSE	FALSE	FALSE	NA	0	NA
WES176	wes	82.6	PR	M	LUAD	ex-smoker	WES	FALSE	FALSE	TRUE	NA	0.311	NA
WES177	wes	56.9	PD	F	LUAD	never	WES	FALSE	FALSE	TRUE	NA	0.04	NA
WES178	wes	46.3	PD	M	LUAD	current-smoker	WES	FALSE	FALSE	FALSE	NA	0	NA
WES179	wes	67.9	PR	M	LUAD	current-smoker	WES	FALSE	FALSE	FALSE	NA	0	NA
WES180	wes	79.1	SD	M	LUSC	current-smoker	WES	FALSE	FALSE	TRUE	NA	0.171	NA
WES181	wes	68.9	PR	F	LUAD	never	WES	FALSE	FALSE	FALSE	NA	0	NA
WES185	wes	70.6	PD	M	LUSC	current-smoker	WES	FALSE	FALSE	FALSE	NA	0	NA
WES186	wes	66.6	PD	F	LUSC	never	WES	FALSE	FALSE	FALSE	NA	0	NA
WES187	wes	58.3	PD	F	LUAD	never	WES	FALSE	FALSE	FALSE	NA	0	NA
WES189	wes	55.6	PD	M	LUAD	never	WES	FALSE	FALSE	FALSE	NA	0	NA
WES190	wes	71.1	PD	F	LUAD	never	WES	FALSE	FALSE	TRUE	NA	0.046	NA
WES191	wes	55.1	SD	F	LUSC	never	WES	FALSE	FALSE	FALSE	NA	0	NA
WES192	wes	81.1	PR	M	LUSC	current-smoker	WES	FALSE	FALSE	TRUE	NA	0.166	NA
WES194	wes	68.4	PR	M	LUAD	ex-smoker	WES	FALSE	FALSE	FALSE	NA	0	NA
WES195	wes	76.1	PD	M	LUAD	ex-smoker	WES	FALSE	FALSE	FALSE	NA	0	NA
WES196	wes	51.9	PD	F	LUAD	never	WES	FALSE	FALSE	TRUE	NA	0.041	NA
WES197	wes	71.4	PR	M	LUAD	ex-smoker	WES	FALSE	FALSE	TRUE	NA	0.029	NA
WES198	wes	74.6	PD	M	LUAD	current-smoker	WES	FALSE	FALSE	FALSE	NA	0	NA

## Sheet: supplementary file 1b
# Supplementary file 1b. Information of control samples
ID	age	condition	Sex	Smoking(0 = No, 1 = Yes)	CHIP_status
normal1	73	Normal	Male	0	FALSE
normal2	71	Normal	Female	0	FALSE
normal3	68	Normal	Male	1	FALSE
normal4	66	Normal	Female	0	FALSE
normal5	65	Normal	Female	0	FALSE
normal6	64	Normal	Female	1	FALSE
normal7	64	Normal	Female	0	FALSE
normal8	63	Normal	Male	1	FALSE
normal9	62	Normal	Male	1	FALSE
normal10	62	Normal	Male	1	FALSE
normal11	62	Normal	Female	0	FALSE
normal12	62	Normal	Male	1	FALSE
normal13	61	Normal	Male	1	FALSE
normal14	61	Normal	Male	0	FALSE
normal15	60	Normal	Female	0	FALSE
normal16	59	Normal	Female	0	TRUE
normal17	57	Normal	Male	1	FALSE
normal18	59	Normal	Female	0	FALSE
normal19	59	Normal	Female	0	FALSE
normal20	58	Normal	Female	NA	FALSE
normal21	58	Normal	Male	1	FALSE
normal22	58	Normal	Male	1	FALSE
normal23	57	Normal	Female	0	FALSE
normal24	57	Normal	Female	0	FALSE
normal25	57	Normal	Female	0	FALSE
normal26	56	Normal	Female	0	TRUE
normal27	56	Normal	Female	0	FALSE
normal28	56	Normal	Male	0	FALSE
normal29	54	Normal	Female	0	FALSE
normal30	54	Normal	Female	0	TRUE
normal31	54	Normal	Female	0	FALSE
normal32	53	Normal	Male	1	FALSE
normal33	52	Normal	Male	0	TRUE
normal34	52	Normal	Female	0	FALSE
normal35	51	Normal	Female	0	FALSE
normal36	51	Normal	Female	0	FALSE
normal37	67	Normal	Female	NA	FALSE
normal38	57	Normal	Male	NA	FALSE
normal39	51	Normal	Female	NA	FALSE
normal40	54	Normal	Male	NA	TRUE
normal41	63	Normal	Male	NA	FALSE
normal42	48	Normal	Male	NA	FALSE

## Sheet: supplementary file 1c
# Supplementary file 1c. List of CHIP variants detected from targeted sequencing
variant_class	group	ID	time	chromosome	position	ref	alt	gene_name	HGVS.c	HGVS.p	results
CHIP_PD	ctrl	normal16	control	chr4	105237280	A	ATTCGGGTGACT	TET2	c.3402_3403insTCGGGTGACTT	p.Thr1135fs	frameshift_variant
CHIP	ctrl	normal26	control	chr4	105269641	G	A	TET2	c.4139G>A	p.Arg1380His	missense_variant
CHIP	ctrl	normal30	control	chr3	47122187	T	C	SETD2	c.2449A>G	p.Met817Val	missense_variant
CHIP	ctrl	normal33	control	chr16	72958682	G	T	ZFHX3	c.1464C>A	p.Asp488Glu	missense_variant
CHIP_PD	ctrl	normal40	control	chr4	105234784	ACT	A	TET2	c.908_909delCT	p.Ser303fs	frameshift_variant
CHIP_PD	cohort	CHIP002	before	chr2	25235724	C	T	DNMT3A	c.2580G>A	p.Trp860*	stop_gained
CHIP_PD	cohort	CHIP002	before	chr2	25244214	G	A	DNMT3A	c.1792C>T	p.Arg598*	stop_gained
CHIP	cohort	CHIP003	before	chr1	150963542	G	A	SETDB1	c.3473G>A	p.Arg1158His	missense_variant
CHIP_PD	cohort	CHIP006	before	chr15	90088702	C	T	IDH2	c.419G>A	p.Arg140Gln	missense_variant
CHIP	cohort	CHIP007	before	chr6	398927	C	T	IRF4	c.737C>T	p.Ala246Val	missense_variant
CHIP_PD	cohort	CHIP009	before	chr20	32433732	C	T	ASXL1	c.1534C>T	p.Gln512*	stop_gained
CHIP_PD	cohort	CHIP010	before	chr2	25234292	A	C	DNMT3A	c.2726T>G	p.Phe909Cys	missense_variant
CHIP	cohort	CHIP011	before	chr1	26779699	A	G	ARID1A	c.5801A>G	p.Lys1934Arg	missense_variant
CHIP	cohort	CHIP011	before	chr2	15945866	C	CCTGGAG	MYCN	c.1166_1171dupTGGAGC	p.Leu389_Glu390dup	disruptive_inframe_insertion
CHIP	cohort	CHIP011	before	chr3	89449304	G	T	EPHA3	c.2426G>T	p.Ser809Ile	missense_variant
CHIP	cohort	CHIP015	before	chr19	49640038	G	A	RRAS	c.61C>T	p.Pro21Ser	missense_variant
CHIP_PD	cohort	CHIP017	before	chr2	25240420	T	C	DNMT3A	c.2204A>G	p.Tyr735Cys	missense_variant
CHIP	cohort	CHIP017	before	chr3	89407320	C	T	EPHA3	c.1646C>T	p.Ala549Val	missense_variant
CHIP_PD	cohort	CHIP017	before	chr4	105237003	C	T	TET2	c.3124C>T	p.Gln1042*	stop_gained
CHIP	cohort	CHIP017	before	chr15	41760438	GT	G	MGA	c.7308delT	p.Gly2437fs	frameshift_variant
CHIP_PD	cohort	CHIP002	after	chr2	25235724	C	T	DNMT3A	c.2580G>A	p.Trp860*	stop_gained
CHIP_PD	cohort	CHIP002	after	chr2	25244214	G	A	DNMT3A	c.1792C>T	p.Arg598*	stop_gained
CHIP	cohort	CHIP003	after	chr1	150963542	G	A	SETDB1	c.3473G>A	p.Arg1158His	missense_variant
CHIP_PD	cohort	CHIP006	after	chr15	90088702	C	T	IDH2	c.419G>A	p.Arg140Gln	missense_variant
CHIP	cohort	CHIP007	after	chr6	398927	C	T	IRF4	c.737C>T	p.Ala246Val	missense_variant
CHIP	cohort	CHIP009	after	chr11	106939975	G	A	GUCY1A2	c.691C>T	p.Pro231Ser	missense_variant
CHIP_PD	cohort	CHIP009	after	chr20	32433732	C	T	ASXL1	c.1534C>T	p.Gln512*	stop_gained
CHIP_PD	cohort	CHIP010	after	chr2	25234292	A	C	DNMT3A	c.2726T>G	p.Phe909Cys	missense_variant
CHIP	cohort	CHIP011	after	chr1	26779699	A	G	ARID1A	c.5801A>G	p.Lys1934Arg	missense_variant
CHIP	cohort	CHIP011	after	chr2	15945866	C	CCTGGAG	MYCN	c.1166_1171dupTGGAGC	p.Leu389_Glu390dup	disruptive_inframe_insertion
CHIP	cohort	CHIP011	after	chr3	89449304	G	T	EPHA3	c.2426G>T	p.Ser809Ile	missense_variant
CHIP	cohort	CHIP011	after	chr17	1679148	C	A	PRPF8	c.1468G>T	p.Val490Leu	missense_variant
CHIP	cohort	CHIP012	after	chr5	38958463	C	G	RICTOR	c.2400G>C	p.Lys800Asn	missense_variant
CHIP	cohort	CHIP015	after	chr19	49640038	G	A	RRAS	c.61C>T	p.Pro21Ser	missense_variant
CHIP_PD	cohort	CHIP017	after	chr2	25240420	T	C	DNMT3A	c.2204A>G	p.Tyr735Cys	missense_variant
CHIP	cohort	CHIP017	after	chr3	89407320	C	T	EPHA3	c.1646C>T	p.Ala549Val	missense_variant
CHIP_PD	cohort	CHIP017	after	chr4	105237003	C	T	TET2	c.3124C>T	p.Gln1042*	stop_gained
CHIP	cohort	CHIP017	after	chr15	41760438	GT	G	MGA	c.7308delT	p.Gly2437fs	frameshift_variant
CHIP	cohort	CHIP018	after	chrX	77683551	C	G	ATRX	c.1705G>C	p.Asp569His	missense_variant
CHIP_PD	cohort	CHIP021	before	chr20	32434485	C	G	ASXL1	c.1773C>G	p.Tyr591*	stop_gained
CHIP	cohort	CHIP024	before	chr2	25241704	A	G	DNMT3A	c.1940T>C	p.Leu647Pro	missense_variant
CHIP_PD	cohort	CHIP024	before	chr2	25246270	C	T	DNMT3A	c.1319G>A	p.Trp440*	stop_gained
CHIP_PD	cohort	CHIP025	before	chr12	49032113	G	A	KMT2D	c.12592C>T	p.Arg4198*	stop_gained
CHIP_PD	cohort	CHIP025	before	chr17	60663385	A	T	PPM1D	c.1651A>T	p.Arg551*	stop_gained
CHIP	cohort	CHIP026	before	chr11	108229239	T	G	ATM	c.247T>G	p.Ser83Ala	missense_variant
CHIP	cohort	CHIP026	before	chr19	10782969	G	T	DNM2	c.698G>T	p.Gly233Val	missense_variant
CHIP_PD	cohort	CHIP027	before	chr12	12718001	GGCGAGCCAGC	G	CDKN1B	c.165_174delGAGCCAGCGC	p.Gln57fs	frameshift_variant
CHIP	cohort	CHIP031	before	chr19	10833087	C	T	TMED1	c.592G>A	p.Ala198Thr	missense_variant
CHIP	cohort	CHIP033	before	chr7	55201265	C	A	EGFR	c.3024C>A	p.Asp1008Glu	missense_variant
CHIP	cohort	CHIP035	before	chr2	39024102	C	CT	SOS1	c.1109dupA	p.Glu371fs	frameshift_variant
CHIP	cohort	CHIP035	before	chr11	118495888	T	G	KMT2A	c.5543T>G	p.Ile1848Ser	missense_variant
CHIP	cohort	CHIP039	before	chr2	25234289	G	A	DNMT3A	c.2729C>T	p.Ala910Val	missense_variant
CHIP	cohort	CHIP039	before	chr7	55155902	A	G	EGFR	c.962A>G	p.Asp321Gly	missense_variant
CHIP	cohort	CHIP043	before	chr7	152273755	C	T	KMT2C	c.962G>A	p.Ser321Asn	missense_variant
CHIP_PD	cohort	CHIP043	before	chr17	60656790	T	TC	PPM1D	c.1210dupC	p.Gln404fs	frameshift_variant
CHIP	cohort	CHIP044	before	chr11	108253972	T	G	ATM	c.2057T>G	p.Leu686Arg	missense_variant
CHIP_PD	cohort	CHIP045	before	chr17	60663340	AG	A	PPM1D	c.1608delG	p.Thr537fs	frameshift_variant
CHIP_PD	cohort	CHIP050	before	chr17	60663336	TA	T	PPM1D	c.1606delA	p.Arg536fs	frameshift_variant
CHIP	cohort	CHIP053	before	chr16	72959968	G	A	ZFHX3	c.178C>T	p.Arg60Cys	missense_variant
CHIP	cohort	CHIP054	before	chr17	1684541	C	T	PRPF8	c.31G>A	p.Gly11Ser	missense_variant
CHIP_PD	cohort	CHIP056	before	chr4	105235715	G	GT	TET2	c.1837dupT	p.Tyr613fs	frameshift_variant
CHIP	cohort	CHIP056	before	chrX	130015797	C	G	BCORL1	c.3025C>G	p.Leu1009Val	missense_variant
CHIP	cohort	CHIP057	before	chr1	64835475	C	A	JAK1	c.3290G>T	p.Gly1097Val	missense_variant
CHIP_PD	cohort	CHIP063	before	chr17	60663250	ACT	A	PPM1D	c.1517_1518delCT	p.Thr506fs	frameshift_variant
CHIP	cohort	CHIP064	before	chr12	11839173	T	C	ETV6	c.197T>C	p.Val66Ala	missense_variant
CHIP	cohort	CHIP067	before	chr1	43339516	C	T	MPL	c.637C>T	p.Gln213*	stop_gained
CHIP_PD	cohort	CHIP067	before	chr4	105235508	TG	T	TET2	c.1631delG	p.Gly544fs	frameshift_variant
CHIP	cohort	CHIP071	before	chr12	45891892	C	T	ARID2	c.5035C>T	p.Arg1679Trp	missense_variant
CHIP_PD	cohort	CHIP071	before	chr17	60663262	C	T	PPM1D	c.1528C>T	p.Gln510*	stop_gained
CHIP_PD	cohort	CHIP073	before	chr4	105243597	A	T	TET2	c.3685A>T	p.Lys1229*	stop_gained
CHIP_PD	cohort	CHIP073	before	chr4	105275149	C	T	TET2	c.4702C>T	p.Gln1568*	stop_gained
CHIP	cohort	CHIP073	before	chr7	152176253	T	C	KMT2C	c.9200A>G	p.Gln3067Arg	missense_variant
CHIP_PD	cohort	CHIP073	before	chr9	5073770	G	T	JAK2	c.1849G>T	p.Val617Phe	missense_variant
CHIP_PD	cohort	CHIP074	before	chr2	25234373	C	T	DNMT3A	c.2645G>A	p.Arg882His	missense_variant
CHIP_PD	cohort	CHIP074	before	chr17	60663200	C	CT	PPM1D	c.1469dupT	p.Leu490fs	frameshift_variant
CHIP	cohort	CHIP077	before	chrX	53214696	A	G	KDM5C	c.1115T>C	p.Val372Ala	missense_variant
CHIP	cohort	CHIP080	before	chr12	45893430	G	A	ARID2	c.5158G>A	p.Val1720Ile	missense_variant
CHIP	cohort	CHIP081	before	chr10	8058829	C	T	GATA3	c.766C>T	p.Arg256Trp	missense_variant
CHIP	cohort	CHIP087	before	chr22	28725054	G	A	CHEK2	c.644C>T	p.Thr215Ile	missense_variant
CHIP	cohort	CHIP088	before	chr3	128481275	C	T	GATA2	c.1187G>A	p.Arg396Gln	missense_variant
CHIP	cohort	CHIP088	before	chr4	186620816	C	T	FAT1	c.5770G>A	p.Gly1924Arg	missense_variant
CHIP	cohort	CHIP088	before	chrX	45059045	A	G	KDM6A	c.915A>G	p.Ile305Met	missense_variant
CHIP	cohort	CHIP088	before	chrX	77717134	TGTTTTGATTC	T	ATRX	c.120_129delGAATCAAAAC	p.Met40fs	frameshift_variant
CHIP_PD	cohort	CHIP090	before	chr4	105269723	CA	C	TET2	c.4223delA	p.Asn1408fs	frameshift_variant
CHIP	cohort	CHIP091	before	chr11	64769504	C	T	SF1	c.960G>A	p.Met320Ile	missense_variant
CHIP	cohort	CHIP093	before	chr2	25241675	C	T	DNMT3A	c.1969G>A	p.Val657Met	missense_variant
CHIP	cohort	CHIP094	before	chr7	55201321	C	A	EGFR	c.3080C>A	p.Pro1027His	missense_variant
CHIP	cohort	CHIP094	before	chrX	77682074	G	T	ATRX	c.3182C>A	p.Ser1061Tyr	missense_variant
CHIP_PD	cohort	CHIP095	before	chr4	105276092	GAGTGGCCGTGGCTCCA	G	TET2	c.5647_5662delGTGGCCGTGGCTCCAA	p.Val1883fs	frameshift_variant
CHIP	cohort	CHIP098	before	chr4	186619456	G	A	FAT1	c.7130C>T	p.Thr2377Met	missense_variant
CHIP	cohort	CHIP099	before	chr12	49031447	G	A	KMT2D	c.13258C>T	p.Arg4420Trp	missense_variant
CHIP_PD	cohort	CHIP021	after	chr20	32434485	C	G	ASXL1	c.1773C>G	p.Tyr591*	stop_gained
CHIP	cohort	CHIP023	after	chr9	136519509	T	G	NOTCH1	c.799A>C	p.Lys267Gln	missense_variant
CHIP_PD	cohort	CHIP023	after	chr12	49053271	C	CA	KMT2D	c.889_890insT	p.Gly297fs	frameshift_variant
CHIP_PD	cohort	CHIP023	after	chr16	3738617	G	A	CREBBP	c.4336C>T	p.Arg1446Cys	missense_variant
CHIP_PD	cohort	CHIP023	after	chr17	39791523	A	C	IKZF3	c.485T>G	p.Leu162Arg	missense_variant
CHIP_PD	cohort	CHIP023	after	chr18	63318488	G	A	BCL2	c.179C>T	p.Ala60Val	missense_variant
CHIP	cohort	CHIP024	after	chr2	25241704	A	G	DNMT3A	c.1940T>C	p.Leu647Pro	missense_variant
CHIP_PD	cohort	CHIP024	after	chr2	25246270	C	T	DNMT3A	c.1319G>A	p.Trp440*	stop_gained
CHIP	cohort	CHIP025	after	chr6	117362618	G	T	ROS1	c.3366C>A	p.Cys1122*	stop_gained
CHIP	cohort	CHIP025	after	chr11	108310213	T	A	ATM	c.5816T>A	p.Leu1939Gln	missense_variant
CHIP_PD	cohort	CHIP025	after	chr12	49032113	G	A	KMT2D	c.12592C>T	p.Arg4198*	stop_gained
CHIP_PD	cohort	CHIP025	after	chr17	60663385	A	T	PPM1D	c.1651A>T	p.Arg551*	stop_gained
CHIP	cohort	CHIP026	after	chr11	108229239	T	G	ATM	c.247T>G	p.Ser83Ala	missense_variant
CHIP_PD	cohort	CHIP027	after	chr12	12718001	GGCGAGCCAGC	G	CDKN1B	c.165_174delGAGCCAGCGC	p.Gln57fs	frameshift_variant
CHIP	cohort	CHIP033	after	chr7	55201265	C	A	EGFR	c.3024C>A	p.Asp1008Glu	missense_variant
CHIP	cohort	CHIP035	after	chr11	118495888	T	G	KMT2A	c.5543T>G	p.Ile1848Ser	missense_variant
CHIP	cohort	CHIP039	after	chr2	25234289	G	A	DNMT3A	c.2729C>T	p.Ala910Val	missense_variant
CHIP	cohort	CHIP039	after	chr7	55155902	A	G	EGFR	c.962A>G	p.Asp321Gly	missense_variant
CHIP_PD	cohort	CHIP045	after	chr17	60663340	AG	A	PPM1D	c.1608delG	p.Thr537fs	frameshift_variant
CHIP	cohort	CHIP046	after	chr4	186617776	A	G	FAT1	c.8810T>C	p.Ile2937Thr	missense_variant
CHIP_PD	cohort	CHIP050	after	chr17	60663336	TA	T	PPM1D	c.1606delA	p.Arg536fs	frameshift_variant
CHIP	cohort	CHIP050	after	chr22	40421091	G	A	MRTFA	c.937C>T	p.Pro313Ser	missense_variant
CHIP	cohort	CHIP053	after	chr16	72959968	G	A	ZFHX3	c.178C>T	p.Arg60Cys	missense_variant
CHIP	cohort	CHIP054	after	chr17	1684541	C	T	PRPF8	c.31G>A	p.Gly11Ser	missense_variant
CHIP_PD	cohort	CHIP056	after	chr4	105235715	G	GT	TET2	c.1837dupT	p.Tyr613fs	frameshift_variant
CHIP_PD	cohort	CHIP056	after	chr20	32435481	G	GC	ASXL1	c.2773dupC	p.Gln925fs	frameshift_variant
CHIP_PD	cohort	CHIP060	after	chr13	32758572	CA	C	PDS5B	c.3229delA	p.Met1077fs	frameshift_variant
CHIP_PD	cohort	CHIP063	after	chr17	60663250	ACT	A	PPM1D	c.1517_1518delCT	p.Thr506fs	frameshift_variant
CHIP	cohort	CHIP064	after	chr12	11839173	T	C	ETV6	c.197T>C	p.Val66Ala	missense_variant
CHIP_PD	cohort	CHIP066	after	chr2	25241600	T	TGGAA	DNMT3A	c.2043_2044insTTCC	p.Met682fs	frameshift_variant
CHIP_PD	cohort	CHIP067	after	chr4	105235508	TG	T	TET2	c.1631delG	p.Gly544fs	frameshift_variant
CHIP_PD	cohort	CHIP067	after	chrX	155071555	C	T	BRCC3	c.28C>T	p.Gln10*	stop_gained
CHIP	cohort	CHIP068	after	chr17	42337857	T	C	STAT3	c.551A>G	p.Asp184Gly	missense_variant&splice_region_variant
CHIP_PD	cohort	CHIP069	after	chr10	8058764	TC	T	GATA3	c.708delC	p.Ser237fs	frameshift_variant
CHIP	cohort	CHIP070	after	chr12	49631474	TC	T	PRPF40B	c.165delC	p.Met56fs	frameshift_variant
CHIP	cohort	CHIP071	after	chr12	45891892	C	T	ARID2	c.5035C>T	p.Arg1679Trp	missense_variant
CHIP_PD	cohort	CHIP071	after	chr17	60663262	C	T	PPM1D	c.1528C>T	p.Gln510*	stop_gained
CHIP_PD	cohort	CHIP073	after	chr4	105243597	A	T	TET2	c.3685A>T	p.Lys1229*	stop_gained
CHIP_PD	cohort	CHIP073	after	chr4	105275149	C	T	TET2	c.4702C>T	p.Gln1568*	stop_gained
CHIP_PD	cohort	CHIP073	after	chr9	5073770	G	T	JAK2	c.1849G>T	p.Val617Phe	missense_variant
CHIP_PD	cohort	CHIP074	after	chr2	25234373	C	T	DNMT3A	c.2645G>A	p.Arg882His	missense_variant
CHIP_PD	cohort	CHIP074	after	chr17	60663200	C	CT	PPM1D	c.1469dupT	p.Leu490fs	frameshift_variant
CHIP	cohort	CHIP076	after	chr4	186588904	G	T	FAT1	c.13455C>A	p.Asn4485Lys	missense_variant
CHIP	cohort	CHIP080	after	chr2	25241582	G	A	DNMT3A	c.2062C>T	p.Arg688Cys	missense_variant
CHIP	cohort	CHIP080	after	chr12	45893430	G	A	ARID2	c.5158G>A	p.Val1720Ile	missense_variant
CHIP	cohort	CHIP081	after	chr10	8058829	C	T	GATA3	c.766C>T	p.Arg256Trp	missense_variant
CHIP	cohort	CHIP087	after	chr14	95090518	G	C	DICER1	c.5749C>G	p.Pro1917Ala	missense_variant
CHIP	cohort	CHIP087	after	chr22	28725054	G	A	CHEK2	c.644C>T	p.Thr215Ile	missense_variant
CHIP	cohort	CHIP099	after	chr12	49031447	G	A	KMT2D	c.13258C>T	p.Arg4420Trp	missense_variant

## Sheet: supplementary file 1d
# Supplementary file 1d. List of CHIP variants detected from WES
variant_class	group	ID	chromosome	position	ref	alt	gene_name	HGVS.c	HGVS.p	results	total_reads	alt_allele_counts	calculated_VAF
CHIP	WES	WES1	chr11	108330357	T	C	ATM	c.7451T>C	p.Val2484Ala	missense_variant	225	16	0.0711111
CHIP-PD	WES	WES101	chr4	105275186	C	CT	TET2	c.4741dupT	p.Tyr1581fs	frameshift_variant	98	9	0.0918367
CHIP-PD	WES	WES102	chr11	119278266	T	A	CBL	c.1196T>A	p.Leu399His	missense_variant	134	4	0.0298507
CHIP-PD	WES	WES102	chr4	105236166	C	T	TET2	c.2287C>T	p.Gln763*	stop_gained	236	6	0.0254237
CHIP-PD	WES	WES104	chr2	25246695	G	A	DNMT3A	c.1204C>T	p.Gln402*	stop_gained	145	5	0.0344828
CHIP-PD	WES	WES105	chr4	105237093	C	T	TET2	c.3214C>T	p.Gln1072*	stop_gained	179	22	0.122905
CHIP-PD	WES	WES106	chr17	60663336	TA	T	PPM1D	c.1606delA	p.Arg536fs	frameshift_variant	303	22	0.0726073
CHIP-PD	WES	WES109	chr7	152265082	AC	A	KMT2C	c.1139delG	p.Arg380fs	frameshift_variant	761	41	0.0538765
CHIP-PD	WES	WES109	chr4	105237070	ATAAGGCTCTTACTC	A	TET2	c.3193_3206delAAGGCTCTTACTCT	p.Lys1065fs	frameshift_variant	185	5	0.027027
CHIP-PD	WES	WES109	chr4	105243701	CAA	C	TET2	c.3791_3792delAA	p.Lys1264fs	frameshift_variant	150	44	0.293333
CHIP	WES	WES116	chr7	102158600	G	A	CUX1	c.748G>A	p.Ala250Thr	missense_variant	69	5	0.0724638
CHIP-PD	WES	WES119	chr7	152265082	AC	A	KMT2C	c.1139delG	p.Arg380fs	frameshift_variant	826	42	0.0508475
CHIP-PD	WES	WES128	chr17	7674277	C	T	TP53	c.686G>A	p.Cys229Tyr	missense_variant	82	6	0.0731707
CHIP	WES	WES130	chr16	72793312	C	G	ZFHX3	c.9370G>C	p.Val3124Leu	missense_variant	83	5	0.060241
CHIP	WES	WES132	chrX	45063776	G	A	KDM6A	c.2038G>A	p.Ala680Thr	missense_variant	111	6	0.0540541
CHIP	WES	WES138	chr2	25245267	A	G	DNMT3A	c.1540T>C	p.Cys514Arg	missense_variant	120	23	0.191667
CHIP	WES	WES14	chr5	132604905	T	C	RAD50	c.2624T>C	p.Leu875Pro	missense_variant	200	4	0.02
CHIP	WES	WES142	chrX	67545385	AAGAGACTAGCCCCAG	A	AR	c.240_254delAGAGACTAGCCCCAG	p.Glu81_Arg85del	disruptive_inframe_deletion	50	5	0.1
CHIP-PD	WES	WES144	chr4	105276261	G	A	TET2	c.5814G>A	p.Trp1938*	stop_gained	139	6	0.0431655
CHIP	WES	WES148	chr12	49024890	G	C	KMT2D	c.15841C>G	p.Leu5281Val	missense_variant	147	9	0.0612245
CHIP-PD	WES	WES149	chr2	25244321	C	T	DNMT3A	c.1685G>A	p.Cys562Tyr	missense_variant	550	18	0.0327273
CHIP	WES	WES156	chr11	108229315	C	G	ATM	c.323C>G	p.Ala108Gly	missense_variant	44	15	0.340909
CHIP-PD	WES	WES171	chr2	25239140	CG	C	DNMT3A	c.2397delC	p.Gly800fs	frameshift_variant	47	7	0.148936
CHIP-PD	WES	WES176	chr4	105243597	A	T	TET2	c.3685A>T	p.Lys1229*	stop_gained	64	19	0.296875
CHIP	WES	WES177	chr20	62879970	C	T	DIDO1	c.5986G>A	p.Ala1996Thr	missense_variant	119	4	0.0336134
CHIP-PD	WES	WES180	chr17	60663200	C	CT	PPM1D	c.1469dupT	p.Leu490fs	frameshift_variant	200	38	0.19
CHIP-PD	WES	WES182	chr4	105276334	C	T	TET2	c.5887C>T	p.Gln1963*	stop_gained	109	4	0.0366972
CHIP	WES	WES190	chr7	55198783	T	C	EGFR	c.2768T>C	p.Ile923Thr	missense_variant	135	5	0.037037
CHIP-PD	WES	WES192	chr20	32435242	A	AC	ASXL1	c.2535dupC	p.Ser846fs	frameshift_variant	102	15	0.147059
CHIP	WES	WES192	chr2	29920347	C	T	ALK	c.313G>A	p.Ala105Thr	missense_variant	94	10	0.106383
CHIP-PD	WES	WES196	chr2	25241686	A	C	DNMT3A	c.1958T>G	p.Leu653Trp	missense_variant	128	5	0.0390625
CHIP-PD	WES	WES197	chr2	25244295	C	G	DNMT3A	c.1711G>C	p.Ala571Pro	missense_variant	217	5	0.0230415
CHIP	WES	WES27	chr4	186663463	G	A	FAT1	c.3416C>T	p.Thr1139Ile	missense_variant	283	6	0.0212014
CHIP	WES	WES28	chr3	41224610	C	G	CTNNB1	c.98C>G	p.Ser33Cys	missense_variant	116	5	0.0431034
CHIP	WES	WES28	chr7	55191822	T	G	EGFR	c.2573T>G	p.Leu858Arg	missense_variant	272	52	0.191176
CHIP-PD	WES	WES36	chr2	25235759	GA	G	DNMT3A	c.2544delT	p.Pro849fs	frameshift_variant	74	15	0.202703
CHIP	WES	WES36	chr4	186596932	C	T	FAT1	c.12608G>A	p.Arg4203His	missense_variant	126	4	0.031746
CHIP	WES	WES38	chr20	32807818	G	A	DNMT3B	c.2477G>A	p.Arg826His	missense_variant	137	4	0.0291971
CHIP	WES	WES38	chr2	208242069	T	C	IDH1	c.775A>G	p.Met259Val	missense_variant	41	5	0.121951
CHIP	WES	WES43	chr12	12718175	CCGCCCGGCGG	C	CDKN1B	c.341_350delCGGCGGCGCC	p.Pro114fs	frameshift_variant	132	4	0.030303
CHIP-PD	WES	WES44	chr11	119278269	T	C	CBL	c.1199T>C	p.Met400Thr	missense_variant	167	5	0.0299401
CHIP-PD	WES	WES44	chr22	28703556	AT	A	CHEK2	c.985delA	p.Ile329fs	frameshift_variant	106	33	0.311321
CHIP-PD	WES	WES52	chr4	105275244	TTATCCAAACTCTTCACACA	T	TET2	c.4798_4816delTATCCAAACTCTTCACACA	p.Tyr1600fs	frameshift_variant	264	41	0.155303
CHIP-PD	WES	WES58	chr17	60663361	TCTGGCCC	T	PPM1D	c.1629_1635delTGGCCCC	p.Gly544fs	frameshift_variant	254	9	0.0354331
CHIP-PD	WES	WES66	chr4	105243667	TG	T	TET2	c.3757delG	p.Val1253fs	frameshift_variant	150	8	0.0533333
CHIP	WES	WES69	chr19	15189102	C	T	NOTCH3	c.1265G>A	p.Gly422Asp	missense_variant	176	5	0.0284091
CHIP-PD	WES	WES75	chr4	105234745	C	A	TET2	c.866C>A	p.Ser289*	stop_gained	101	31	0.306931
CHIP-PD	WES	WES77	chr2	25240402	G	A	DNMT3A	c.2222C>T	p.Ala741Val	missense_variant	62	7	0.112903
CHIP	WES	WES77	chr4	186589167	G	T	FAT1	c.13192C>A	p.Gln4398Lys	missense_variant	87	22	0.252874
CHIP	WES	WES77	chr4	186619259	C	T	FAT1	c.7327G>A	p.Ala2443Thr	missense_variant	119	8	0.0672269
CHIP-PD	WES	WES80	chr4	105272903	GCTAA	G	TET2	c.4586_4589delCTAA	p.Ala1529fs	frameshift_variant	86	18	0.209302
CHIP-PD	WES	WES81	chr17	7674944	C	T	TP53	c.587G>A	p.Arg196Gln	missense_variant	201	10	0.0497512
CHIP	WES	WES82	chr12	12718026	GATTTTCAGA	G	CDKN1B	c.190_198delTTTCAGAAT	p.Phe64_Asn66del	conservative_inframe_deletion	176	8	0.0454545
CHIP	WES	WES86	chr12	12718066	G	C	CDKN1B	c.227G>C	p.Trp76Ser	missense_variant	249	8	0.0321285
CHIP	WES	WES89	chr4	186708407	T	A	FAT1	c.1421A>T	p.Glu474Val	missense_variant	189	5	0.026455
CHIP-PD	WES	WES9	chr11	108365359	C	T	ATM	c.9022C>T	p.Arg3008Cys	missense_variant	182	5	0.0274725
CHIP	WES	WES94	chr22	20991815	A	G	LZTR1	c.979A>G	p.Ser327Gly	missense_variant	56	42	0.75
CHIP-PD	WES	WES96	chr7	152265082	AC	A	KMT2C	c.1139delG	p.Arg380fs	frameshift_variant	854	43	0.0503513

## Sheet: supplementary file 1e
# Supplementary file 1e. Identified DEGs from annotated clusters of scRNA-seq
feature	group	avgExpr	logFC	statistic	auc	pval	padj	pct_in	pct_out
MS4A1	B	7.03508	7.00396	1.26031e+10	0.967292	0	0	93.8532	2.10434
CD79A	B	9.17607	9.10097	1.24745e+10	0.957419	0	0	92.1614	2.84098
BANK1	B	3.85008	3.81462	1.22221e+10	0.938049	0	0	88.5091	2.69798
AFF3	B	3.53127	3.45436	1.19968e+10	0.92076	0	0	86.3177	4.86001
CD74	B	99.9552	81.7874	1.1939e+10	0.916318	0	0	99.5521	91.6152
CD79B	B	3.56531	3.42278	1.18084e+10	0.9063	0	0	85.3289	10.7966
LINC00926	B	2.2866	2.27642	1.16474e+10	0.893939	0	0	79.2027	0.795894
CD37	B	14.095	10.6719	1.16093e+10	0.891016	0	0	98.0533	85.941
RALGPS2	B	2.60993	2.55196	11587035758	0.889308	0	0	80.1433	4.75465
HLA-DRA	B	24.5854	18.9337	1.15829e+10	0.888992	0	0	97.0196	51.8884
HLA-DQA1	B	5.26376	4.45613	1.15825e+10	0.888961	0	0	90.3318	23.7637
NIBAN3	B	2.28763	2.2777	1.15465e+10	0.886196	0	0	77.635	0.685409
IGHM	B	2.91135	2.82749	1.13577e+10	0.871704	0	0	75.1576	1.62765
HLA-DQB1	B	4.54512	3.50272	1.10946e+10	0.851513	0	0	89.2051	32.1441
HLA-DPB1	B	10.2443	7.06074	1.10439e+10	0.847623	0	0	95.4312	64.6884
TCL1A	B	4.46942	4.45632	1.10028e+10	0.844468	0	0	69.283	0.86918
HLA-DPA1	B	10.3531	6.6354	1.08909e+10	0.835877	0	0	94.6697	63.9651
FCRL1	B	1.62867	1.61886	1.08728e+10	0.834491	0	0	67.4121	0.756913
HVCN1	B	2.01712	1.8245	1.0842e+10	0.832124	0	0	75.1955	14.3686
HLA-DRB1	B	11.188	6.90712	1.0701e+10	0.821306	0	0	95.8826	59.6847
FCER2	B	1.80953	1.79935	1.06972e+10	0.821014	0	0	64.7004	0.75424
MEF2C	B	2.46625	2.04068	1.06875e+10	0.820269	0	0	79.7988	21.3907
BACH2	B	2.70051	2.43214	1.06841e+10	0.82001	0	0	74.2721	15.4802
GNG7	B	1.31913	1.2636	1.06512e+10	0.81748	0	0	66.275	3.69769
LTB	B	8.97195	5.88724	1.04697e+10	0.803556	0	0	91.5377	41.5478
HLA-DRB5	B	7.95676	5.04607	1.03468e+10	0.794116	0	0	91.3827	51.1595
VPREB3	B	1.34979	1.34587	1.02292e+10	0.785095	0	0	57.2477	0.309626
BLK	B	1.09682	1.0888	1.01979e+10	0.782694	0	0	57.0479	0.623707
HLA-DMA	B	2.45898	1.63132	1.01746e+10	0.780902	0	0	81.7352	31.6264
PAX5	B	1.03842	1.03343	1.01595e+10	0.779741	0	0	56.2623	0.375561
SPIB	B	1.31499	1.3074	1.01442e+10	0.778572	0	0	56.1692	0.587621
FCMR	B	2.32791	1.73837	10061682226	0.772237	0	0	77.7004	33.0544
FCRLA	B	1.10867	1.10456	1.00509e+10	0.771413	0	0	54.5292	0.30272
SWAP70	B	1.12421	1.01377	1.00291e+10	0.769733	0	0	61.0723	8.9199
PLPP5	B	1.42242	1.33098	1.00259e+10	0.769493	0	0	59.191	7.6531
IGHD	B	1.18031	1.16065	1.00256e+10	0.769466	0	0	54.1915	0.374447
HLA-DOB	B	0.932777	0.92291	1.00243e+10	0.76937	0	0	54.5808	0.88945
EAF2	B	1.05316	0.931364	9773118506	0.75009	0	0	57.2925	8.8651
CD19	B	0.870241	0.86487	9.7636e+09	0.749359	0	0	50.2291	0.403405
NCF1	B	3.08976	1.43551	9.72474e+09	0.746377	0	0	85.2117	38.3252
ADAM28	B	0.932019	0.907439	9.72019e+09	0.746028	0	0	50.8803	2.0148
SNX2	B	1.67857	1.15569	9694486978	0.744055	0	0	74.2928	33.354
CD40	B	0.896978	0.844836	9.69264e+09	0.743913	0	0	52.4756	4.39312
HLA-DMB	B	1.32984	0.982228	9.69066e+09	0.743761	0	0	66.0028	18.8832
BLNK	B	0.772491	0.758838	9.68823e+09	0.743574	0	0	49.5779	0.921304
CD22	B	0.795128	0.78191	9.57819e+09	0.735129	0	0	48.0033	1.1318
P2RX5	B	0.897909	0.871844	9577434499	0.735071	0	0	48.8268	2.18854
RUBCNL	B	0.784137	0.755711	9516908793	0.730426	0	0	48.2204	2.5024
ZCCHC7	B	1.4525	1.06768	9.50632e+09	0.729613	0	0	67.7359	28.9707
BIRC3	B	1.19629	0.944961	9.45792e+09	0.725898	0	0	60.1144	18.0104
COL19A1	B	0.804431	0.799894	9.34334e+09	0.717104	0	0	43.7205	0.340588
RPS5	B	17.1274	7.16768	9.33681e+09	0.716603	0	0	95.6517	89.9483
ADK	B	1.57361	1.12063	9323009372	0.715544	0	0	66.5403	29.6951
POU2AF1	B	0.736588	0.707566	9319768677	0.715295	0	0	43.9892	0.923086
IGKC	B	1.46263	0.761832	9.29908e+09	0.713707	0	0	45.9119	4.15879
TPD52	B	0.835785	0.704578	9.26896e+09	0.711396	0	0	51.5522	10.7131
EBF1	B	0.727526	0.722205	9.26279e+09	0.710922	0	0	42.5628	0.425012
2001-03-01	B	1.19423	0.838712	9.25814e+09	0.710565	0	0	60.614	19.295
FCHSD2	B	1.28543	0.937917	9.23969e+09	0.709149	0	0	61.4961	23.452
CYB561A3	B	0.999621	0.851025	9.21966e+09	0.707611	0	0	51.9347	13.0963
PDLIM1	B	0.86776	0.690064	9.20483e+09	0.706474	0	0	52.3412	12.0148
PKIG	B	0.618647	0.603248	9.19891e+09	0.706019	0	0	42.4663	1.42539
RPL18A	B	31.9847	11.9091	9.18419e+09	0.704889	0	0	97.4572	94.9774
HLA-DQA2	B	2.13538	1.69825	9153101665	0.702503	0	0	52.8064	15.4575
IL4R	B	1.29136	1.09407	9.12553e+09	0.700387	0	0	52.3688	16.4231
SYNGR2	B	2.04376	1.16932	9.11098e+09	0.69927	0	0	75.2128	46.9025
CD72	B	0.76777	0.730337	9085555455	0.697319	0	0	42.3216	3.40522
TSPAN3	B	0.735934	0.646908	9.08476e+09	0.697258	0	0	46.439	8.06653
CD52	B	10.4913	4.24083	9.05989e+09	0.695349	0	0	94.8145	80.5332
BCL11A	B	0.628502	0.579385	9033779667	0.693345	0	0	42.4594	4.13094
TCF4	B	0.71116	0.646406	9.01339e+09	0.691781	0	0	42.9418	5.05492
CXCR4	B	3.38959	1.74737	9006724714	0.691269	0	0	77.032	45.1815
RPS23	B	32.0442	11.0629	8963187243	0.687927	0	0	97.3159	94.7275
STX7	B	0.948799	0.683136	8.93866e+09	0.686045	0	0	54.9116	20.3453
CD24	B	0.628812	0.627092	8912031334	0.684001	0	0	36.9362	0.15459
IRF8	B	0.792509	0.63368	8.91073e+09	0.683901	0	0	47.3969	11.6593
LINC02397	B	0.547014	0.545056	8.89286e+09	0.682529	0	0	36.6571	0.163723
BTG1	B	7.31279	2.94303	8.85724e+09	0.679796	0	0	95.4347	86.3052
WDFY4	B	0.629432	0.552803	8.85384e+09	0.679535	0	0	41.729	6.3108
RPL8	B	24.2574	7.57319	8810452570	0.676205	0	0	97.1574	94.7678
PLEKHG1	B	0.545154	0.532118	8799847817	0.675391	0	0	36.1265	1.14161
SNX29	B	1.00024	0.689266	8.7762e+09	0.673576	0	0	54.6084	22.7925
SYPL1	B	0.80164	0.589582	8.7726e+09	0.673299	0	0	50.2188	17.7104
SMIM14	B	0.893016	0.692211	8.73555e+09	0.670456	0	0	48.2858	16.4467
RPS8	B	40.822	12.1295	8.7037e+09	0.668012	0	0	98.2703	96.5039
SEC62	B	1.63774	0.813389	8.67535e+09	0.665836	0	0	74.5168	51.3732
ISG20	B	1.81522	0.849034	8.67025e+09	0.665444	0	0	73.018	46.469
FOXP1	B	2.55387	1.19722	8664123622	0.664974	0	0	80.7394	60.2075
UVRAG	B	1.10474	0.642197	8.63933e+09	0.663071	0	0	61.0033	32.2599
ST6GAL1	B	1.0183	0.642976	8.59523e+09	0.659686	0	0	55.4939	26.8051
CDK14	B	0.584502	0.537298	8.58396e+09	0.658822	0	0	35.21	3.71395
RPS11	B	6.779	2.31959	8.57954e+09	0.658482	0	0	93.8635	87.1332
S100A8	CD14_Mono	106.377	104.497	4.14842e+10	0.990065	0	0	99.8297	41.908
S100A9	CD14_Mono	69.5324	67.9441	4.10583e+10	0.9799	0	0	99.4492	40.3074
LYZ	CD14_Mono	44.5169	42.207	4.0828e+10	0.974405	0	0	99.6602	37.3836
VCAN	CD14_Mono	8.03678	7.65999	39506252291	0.942859	0	0	93.4631	13.1316
FCN1	CD14_Mono	11.2163	9.86958	3.91698e+10	0.93483	0	0	97.1717	16.6055
S100A12	CD14_Mono	9.4893	9.36744	3.91181e+10	0.933596	0	0	88.9244	7.34058
CST3	CD14_Mono	22.6344	17.9054	3.90488e+10	0.931942	0	0	99.4648	30.7109
MNDA	CD14_Mono	5.94464	5.52614	3.89669e+10	0.929988	0	0	93.1233	13.2037
IFI30	CD14_Mono	20.2974	16.0578	3.89067e+10	0.928551	0	0	99.0843	30.6303
S100A6	CD14_Mono	36.8333	28.94	3.88942e+10	0.928253	0	0	99.8833	87.323
AIF1	CD14_Mono	9.67448	7.49968	3.85068e+10	0.919007	0	0	97.9525	22.6585
FTL	CD14_Mono	80.6037	58.4358	3.83022e+10	0.914123	0	0	99.9568	96.5976
CSTA	CD14_Mono	3.58482	3.35206	3.81466e+10	0.910409	0	0	88.1099	8.33533
CTSS	CD14_Mono	10.5731	8.50486	3.81082e+10	0.909494	0	0	97.6982	50.7089
CD14	CD14_Mono	4.27957	4.10566	3.80421e+10	0.907915	0	0	85.669	6.87246
TYMP	CD14_Mono	6.67773	5.71593	3.78526e+10	0.903392	0	0	93.8729	25.7109
LST1	CD14_Mono	5.36399	3.50745	3.76094e+10	0.897588	0	0	94.6243	18.5252
TYROBP	CD14_Mono	21.1585	16.2718	37553699004	0.89626	0	0	99.4717	48.7374
TSPO	CD14_Mono	7.50128	5.9503	3.7343e+10	0.891231	0	0	96.7877	58.4293
MS4A6A	CD14_Mono	3.31738	3.05442	3.73152e+10	0.890568	0	0	84.1938	8.16641
FTH1	CD14_Mono	71.5555	49.3524	3.72494e+10	0.888996	0	0	99.9628	97.7091
GABARAP	CD14_Mono	11.4176	8.3139	3.71848e+10	0.887454	0	0	98.805	80.6528
SERPINA1	CD14_Mono	5.26426	4.07279	3.70986e+10	0.885398	0	0	89.6542	12.8032
S100A11	CD14_Mono	13.5334	9.88254	3.70732e+10	0.884792	0	0	98.8448	67.649
TKT	CD14_Mono	5.87404	4.84695	3.6656e+10	0.874835	0	0	92.6157	43.1412
SPI1	CD14_Mono	3.81135	3.094	3.66508e+10	0.874711	0	0	87.9292	14.3822
NCF1	CD14_Mono	5.06839	4.38898	3.65109e+10	0.871372	0	0	88.7956	25.9704
CSF3R	CD14_Mono	2.21488	2.08463	3.63695e+10	0.867996	0	0	78.6176	6.6776
PSAP	CD14_Mono	9.86266	6.62515	3.62117e+10	0.86423	0	0	96.6399	63.941
PLXDC2	CD14_Mono	2.6657	2.34328	3.61451e+10	0.862642	0	0	82.2794	11.9489
S100A4	CD14_Mono	35.376	22.7427	3.60172e+10	0.85959	0	0	99.8729	86.4295
FCER1G	CD14_Mono	8.81383	5.96855	3.59826e+10	0.858764	0	0	96.6079	35.5006
GRN	CD14_Mono	3.52835	3.06683	3.58645e+10	0.855946	0	0	83.2453	19.4187
CYBB	CD14_Mono	3.08067	2.59542	3.58376e+10	0.855303	0	0	83.4035	14.902
NEAT1	CD14_Mono	7.65565	5.60919	35825031158	0.855003	0	0	96.0977	60.0131
LGALS3	CD14_Mono	3.90625	3.16847	3.58012e+10	0.854435	0	0	87.2392	23.3463
COTL1	CD14_Mono	8.96278	5.59561	3.56363e+10	0.850498	0	0	97.1777	53.2317
CFD	CD14_Mono	2.95041	2.337	3.54464e+10	0.845967	0	0	80.6141	11.1736
NCF2	CD14_Mono	2.36823	2.07514	3.54045e+10	0.844966	0	0	78.4187	10.3563
TALDO1	CD14_Mono	4.25665	3.36568	35403055490	0.844932	0	0	90.3667	47.752
PYCARD	CD14_Mono	3.94734	2.95453	35340140472	0.843431	0	0	91.1605	41.7926
BLVRB	CD14_Mono	2.30385	2.00047	3.51049e+10	0.837817	0	0	78.589	16.1733
RNF130	CD14_Mono	2.41844	2.02104	3.50621e+10	0.836795	0	0	81.0049	18.5122
FPR1	CD14_Mono	1.96987	1.79904	3.50524e+10	0.836564	0	0	73.9579	7.40903
CD68	CD14_Mono	2.91328	2.23787	3.50322e+10	0.836082	0	0	80.3383	13.5641
SAT1	CD14_Mono	9.68785	6.27742	3.4988e+10	0.835026	0	0	94.8466	60.015
S100A10	CD14_Mono	13.7438	9.58611	3.46086e+10	0.825972	0	0	97.5737	79.7734
LGALS2	CD14_Mono	2.96807	2.78918	3.46029e+10	0.825836	0	0	69.7279	5.5948
AP1S2	CD14_Mono	3.06895	2.47656	3.43114e+10	0.818878	0	0	81.7338	29.7584
ARHGAP26	CD14_Mono	2.34506	1.89987	3.42262e+10	0.816845	0	0	80.1281	25.3587
HCK	CD14_Mono	1.94508	1.52778	3.41035e+10	0.813918	0	0	74.9349	11.1308
TNFSF13B	CD14_Mono	1.7353	1.5214	3.40355e+10	0.812295	0	0	71.5238	10.2166
RNASEK	CD14_Mono	6.73449	4.12705	3.40069e+10	0.81161	0	0	97.1985	80.2115
TNFAIP2	CD14_Mono	1.61159	1.46136	3.39349e+10	0.809894	0	0	68.6125	7.18712
CFP	CD14_Mono	2.06871	1.67819	33928669452	0.809744	0	0	73.2618	11.6193
FCGRT	CD14_Mono	2.02642	1.69168	3.38907e+10	0.808838	0	0	74.3323	15.7518
PGD	CD14_Mono	2.13934	1.83412	3.38467e+10	0.807788	0	0	75.0361	20.6784
OAZ1	CD14_Mono	12.752	7.43307	3.38133e+10	0.806991	0	0	98.7739	90.1107
CD302	CD14_Mono	1.57793	1.39427	3.37551e+10	0.805602	0	0	69.7063	10.0494
APLP2	CD14_Mono	2.11903	1.78316	3.37057e+10	0.804424	0	0	75.3457	21.3886
CAPG	CD14_Mono	1.99441	1.7144	3.36936e+10	0.804135	0	0	72.3937	15.1482
DPYD	CD14_Mono	3.56251	2.59013	3.3683e+10	0.80388	0	0	87.0213	46.2447
SLC11A1	CD14_Mono	1.59955	1.37087	3.36822e+10	0.803861	0	0	70.2268	9.61742
NPC2	CD14_Mono	3.58505	2.53295	33671111432	0.803597	0	0	84.0589	36.7374
GSTP1	CD14_Mono	6.27492	4.12894	33646496019	0.80301	0	0	94.0632	65.5604
LGALS1	CD14_Mono	9.10233	5.90214	3.36272e+10	0.802549	0	0	95.4674	56.4379
RAB31	CD14_Mono	1.62912	1.38295	3.3547e+10	0.800636	0	0	70.8001	11.5225
NAMPT	CD14_Mono	3.73347	3.0671	3.35353e+10	0.800357	0	0	75.6932	21.8644
CD36	CD14_Mono	1.76353	1.63841	3.35177e+10	0.799937	0	0	65.4132	6.71237
IGSF6	CD14_Mono	1.89114	1.59384	3.34813e+10	0.799068	0	0	68.9445	8.78938
CLEC7A	CD14_Mono	1.62677	1.38832	33474449335	0.798904	0	0	68.8649	8.69277
JAML	CD14_Mono	1.609	1.3591	3.33627e+10	0.796238	0	0	70.6565	13.9826
GAPDH	CD14_Mono	21.8329	13.5283	3.33182e+10	0.795175	0	0	98.997	91.6845
CPVL	CD14_Mono	1.88809	1.59285	3.32759e+10	0.794165	0	0	67.6319	8.70354
CEBPD	CD14_Mono	1.78644	1.59595	3.30699e+10	0.78925	0	0	66.3462	10.579
FGL2	CD14_Mono	2.10348	1.64151	3.30462e+10	0.788684	0	0	72.9081	17.8128
VIM	CD14_Mono	22.1668	14.2736	3.30077e+10	0.787765	0	0	98.6373	85.7439
RBM47	CD14_Mono	1.43668	1.27676	3.29694e+10	0.786851	0	0	64.8183	8.23597
LYN	CD14_Mono	2.72753	1.70783	32945841087	0.786288	0	0	83.9941	33.0245
CLEC12A	CD14_Mono	1.54323	1.33166	3.29225e+10	0.785732	0	0	65.9017	9.18187
STXBP2	CD14_Mono	2.96534	2.045	3.28917e+10	0.784995	0	0	83.4511	41.9615
HLA-DRA	CD14_Mono	10.9712	5.50091	3.28316e+10	0.783561	0	0	90.8699	43.0603
ASGR1	CD14_Mono	1.11682	1.04682	3.2574e+10	0.777413	0	0	59.5248	4.45127
PTPRE	CD14_Mono	1.81091	1.41654	32562318123	0.777135	0	0	73.6699	24.7733
CTSB	CD14_Mono	2.17826	1.67898	3.25588e+10	0.77705	0	0	74.423	25.6745
H3F3A	CD14_Mono	12.4321	6.67292	3.24991e+10	0.775627	0	0	98.7808	92.2465
TRAPPC5	CD14_Mono	2.62255	1.77672	3.24091e+10	0.773479	0	0	84.2059	47.5671
PLBD1	CD14_Mono	1.5392	1.43979	3.23979e+10	0.77321	0	0	59.5957	5.86474
AP2S1	CD14_Mono	2.2875	1.52985	3.239e+10	0.773022	0	0	82.8432	42.6228
MPEG1	CD14_Mono	1.27403	1.11569	3.23621e+10	0.772356	0	0	62.0444	7.75598
GCA	CD14_Mono	1.37954	1.21112	3.23056e+10	0.771008	0	0	63.4659	11.5084
C4orf48	CD14_Mono	1.63475	1.20073	3.22981e+10	0.770829	0	0	75.7235	27.8688
LRMDA	CD14_Mono	1.32697	1.13901	3.22951e+10	0.770758	0	0	62.2554	8.51585
LILRA5	CD14_Mono	1.39591	1.10044	3.22602e+10	0.769924	0	0	63.2126	7.9928
GNAI2	CD14_Mono	2.12095	1.48296	3.22289e+10	0.769179	0	0	79.5713	36.7849
ALDH2	CD14_Mono	1.26963	1.15958	3.22249e+10	0.769081	0	0	59.0224	5.65359
CDA	CD14_Mono	1.19631	1.10831	3.21981e+10	0.768443	0	0	58.2727	4.93264
ANXA5	CD14_Mono	2.78414	1.80409	3.20737e+10	0.765473	0	0	82.225	39.4964
PLAUR	CD14_Mono	2.2311	1.91357	3.2047e+10	0.764836	0	0	62.1785	9.89923
SLC8A1	CD14_Mono	1.52062	1.20287	3.20183e+10	0.764151	0	0	63.7815	10.4924
LYN	CD16_Mono	7.22654	6.17964	1.21421e+10	0.907534	0	0	96.0915	41.9771
SAT1	CD16_Mono	26.6427	23.1602	1.20161e+10	0.898121	0	0	96.681	66.5617
LST1	CD16_Mono	20.2944	18.7612	1.18441e+10	0.885263	0	0	87.6549	33.5597
IFI30	CD16_Mono	44.0074	38.2732	1.1797e+10	0.881746	0	0	94.0384	44.0729
HCK	CD16_Mono	4.3596	3.81067	1.1713e+10	0.87546	0	0	88.4252	22.448
LILRB2	CD16_Mono	4.58567	4.19329	1.16663e+10	0.871976	0	0	84.3593	17.9286
AIF1	CD16_Mono	22.7398	19.9997	1.16455e+10	0.870416	0	0	87.6716	37.7595
TCF7L2	CD16_Mono	3.10061	2.97354	1.15825e+10	0.865708	0	0	77.6542	9.00615
SERPINA1	CD16_Mono	13.2916	11.8553	1.15763e+10	0.865246	0	0	86.4257	27.7324
PSAP	CD16_Mono	25.3563	21.8827	1.15733e+10	0.865022	0	0	93.7169	70.3964
CST3	CD16_Mono	44.1782	37.4566	1.15713e+10	0.864873	0	0	91.2117	44.4246
SPI1	CD16_Mono	7.0781	5.98605	1.15602e+10	0.864041	0	0	89.7448	28.3427
NEAT1	CD16_Mono	10.8936	7.98898	1.15167e+10	0.860794	0	0	98.3221	66.7737
TBXAS1	CD16_Mono	3.3107	2.78358	1.15024e+10	0.859724	0	0	87.6582	26.5418
MS4A7	CD16_Mono	5.52555	5.27432	1.14957e+10	0.85922	0	0	78.5585	13.438
WARS	CD16_Mono	4.83951	4.42168	1.14827e+10	0.858252	0	0	82.4067	21.8376
FCER1G	CD16_Mono	20.5684	17.3636	1.14147e+10	0.853167	0	0	90.4649	47.6097
FCN1	CD16_Mono	14.0785	11.0329	1.13869e+10	0.851091	0	0	93.8576	32.2517
CTSS	CD16_Mono	16.3331	13.0204	1.1363e+10	0.849301	0	0	93.5495	59.9821
COTL1	CD16_Mono	22.4988	18.9622	1.13499e+10	0.848324	0	0	91.9017	61.9973
SMIM25	CD16_Mono	4.36767	4.15868	1.13438e+10	0.847871	0	0	75.782	12.5159
SLC8A1	CD16_Mono	3.20648	2.77076	1.13431e+10	0.84782	0	0	83.2273	19.3995
CFD	CD16_Mono	6.75598	5.9487	1.12461e+10	0.840569	0	0	81.8005	24.3897
PILRA	CD16_Mono	3.25638	2.87594	1.12445e+10	0.840445	0	0	79.9149	18.3636
TYMP	CD16_Mono	8.11518	6.15478	1.12286e+10	0.839256	0	0	92.2232	38.8713
CYBB	CD16_Mono	4.5276	3.64183	1.12251e+10	0.838999	0	0	87.4908	27.7451
CD68	CD16_Mono	6.92103	6.0842	1.12064e+10	0.837599	0	0	81.7134	26.2572
TNFRSF1B	CD16_Mono	4.60419	3.76557	1.1195e+10	0.836749	0	0	87.6716	44.0591
MTSS1	CD16_Mono	3.28867	2.92474	1.11583e+10	0.834002	0	0	78.8465	23.9726
IFITM3	CD16_Mono	31.3096	27.8932	1.11091e+10	0.830328	0	0	87.2999	71.3933
CSF1R	CD16_Mono	2.58283	2.43191	1.10913e+10	0.828999	0	0	71.8434	9.69395
PECAM1	CD16_Mono	3.46986	3.0549	1.10414e+10	0.825269	0	0	79.3355	24.7149
TIMP1	CD16_Mono	7.76891	6.6832	1.10414e+10	0.825267	0	0	83.7698	43.3496
NPC2	CD16_Mono	7.49511	6.21859	1.1e+10	0.822169	0	0	83.2139	45.854
SLC11A1	CD16_Mono	2.35297	1.91203	1.09743e+10	0.820248	0	0	80.5312	20.5352
CLEC7A	CD16_Mono	2.51788	2.07301	1.09541e+10	0.818742	0	0	79.3623	19.514
LILRA5	CD16_Mono	3.30153	2.92235	1.09518e+10	0.818566	0	0	75.3567	17.7561
ZEB2	CD16_Mono	5.89279	4.20327	1.09295e+10	0.816905	0	0	93.9145	54.6388
CALHM6	CD16_Mono	3.51433	3.16031	1.09097e+10	0.81542	0	0	73.7491	19.1328
RNF149	CD16_Mono	3.77426	2.79592	1.09095e+10	0.815411	0	0	89.1754	52.4888
FTH1	CD16_Mono	134.533	107.077	1.08958e+10	0.814381	0	0	98.7307	98.2227
HLA-DRA	CD16_Mono	24.015	18.3606	1.08891e+10	0.813885	0	0	91.4093	52.1781
CPPED1	CD16_Mono	2.25246	1.85315	1.08832e+10	0.813443	0	0	78.381	21.3656
NAMPT	CD16_Mono	5.39108	4.24794	10880425800	0.813235	0	0	84.4497	31.5871
ASAH1	CD16_Mono	3.78291	3.0252	1.08804e+10	0.813235	0	0	83.9038	39.7057
HMOX1	CD16_Mono	3.3023	3.06651	1.08733e+10	0.8127	0	0	71.0764	14.2671
C5AR1	CD16_Mono	2.92575	2.61537	1.08698e+10	0.812438	0	0	73.1027	14.8509
LYST	CD16_Mono	3.17205	2.44569	1.08561e+10	0.811416	0	0	85.21	38.2886
TYROBP	CD16_Mono	27.7632	20.2011	1.08549e+10	0.811324	0	0	90.7763	59.0305
FAM49A	CD16_Mono	2.00218	1.69315	1.08136e+10	0.808238	0	0	75.7351	20.5937
S100A11	CD16_Mono	21.29	16.2638	1.08082e+10	0.807837	0	0	90.4046	74.1842
LRRC25	CD16_Mono	2.46597	2.27356	10808192013	0.807836	0	0	69.4923	12.2006
POU2F2	CD16_Mono	2.82293	2.26956	1.08003e+10	0.80725	0	0	80.347	29.6594
HLA-DPA1	CD16_Mono	17.8165	14.6084	1.07781e+10	0.80559	0	0	85.9971	64.4858
CFP	CD16_Mono	3.62164	3.01329	1.07749e+10	0.805345	0	0	77.3963	23.146
FGL2	CD16_Mono	3.64706	2.97366	1.07642e+10	0.804549	0	0	78.9772	27.9571
FGR	CD16_Mono	4.06765	3.06515	1.07531e+10	0.803719	0	0	86.9884	43.3253
RNF130	CD16_Mono	2.83214	2.07535	1.07484e+10	0.80337	0	0	84.0847	30.272
FTL	CD16_Mono	160.324	132.28	1.07412e+10	0.802827	0	0	96.6877	97.4586
NCF2	CD16_Mono	2.84018	2.18123	1.06898e+10	0.798987	0	0	79.7977	23.2958
RNASET2	CD16_Mono	4.92096	3.83118	1.06801e+10	0.798259	0	0	84.8282	54.3103
VSIR	CD16_Mono	4.68816	3.51269	1.06722e+10	0.797672	0	0	87.1827	53.5015
LRRFIP1	CD16_Mono	5.3162	3.41024	1.06625e+10	0.796948	0	0	94.37	71.9429
CUX1	CD16_Mono	2.70119	2.22554	10650702986	0.796065	0	0	77.9289	29.4318
PLXDC2	CD16_Mono	2.87779	2.12085	1.064e+10	0.795262	0	0	82.4134	25.4056
MAFB	CD16_Mono	2.61427	2.33039	1.06376e+10	0.795082	0	0	68.6215	12.6355
HLA-DRB1	CD16_Mono	16.581	12.6723	1.06359e+10	0.794957	0	0	90.207	59.9954
STXBP2	CD16_Mono	5.23287	4.07208	1.06042e+10	0.792588	0	0	84.4196	49.8407
ANXA5	CD16_Mono	4.69358	3.49535	1.0596e+10	0.791979	0	0	84.2354	47.5434
BID	CD16_Mono	2.2244	1.86089	1.05317e+10	0.787168	0	0	73.029	25.0137
ADGRE5	CD16_Mono	4.75122	3.31962	1.05181e+10	0.786151	0	0	89.6477	61.0673
UTRN	CD16_Mono	3.59405	2.58442	1.05159e+10	0.785987	0	0	86.6535	52.9485
RAB31	CD16_Mono	1.98627	1.49912	1.05121e+10	0.785707	0	0	76.8169	22.471
SLC7A7	CD16_Mono	2.22929	1.88477	1.051e+10	0.78555	0	0	70.3865	16.9246
STX11	CD16_Mono	2.15376	1.68539	1.0493e+10	0.784281	0	0	75.4538	24.4788
ADGRE2	CD16_Mono	1.51829	1.36742	1.04873e+10	0.783849	0	0	64.6292	9.90707
CPVL	CD16_Mono	2.57341	2.01887	1.04848e+10	0.783665	0	0	73.9936	19.5622
RHOB	CD16_Mono	3.43663	3.07001	1.04812e+10	0.783395	0	0	69.02	18.9329
FCGR3A	CD16_Mono	8.23548	7.08124	1.04741e+10	0.782867	0	0	75.2663	31.0747
IFNGR2	CD16_Mono	2.17416	1.68563	1.0456e+10	0.781515	0	0	75.9394	25.7917
PLAUR	CD16_Mono	3.07171	2.44381	1.04343e+10	0.779888	0	0	72.6104	19.2136
IGSF6	CD16_Mono	2.88408	2.34779	1.04148e+10	0.778435	0	0	71.7731	20.1183
BCL2A1	CD16_Mono	2.73099	2.33163	1.04125e+10	0.778261	0	0	70.2358	22.4658
NFKBIZ	CD16_Mono	2.97371	2.41271	1.04043e+10	0.777646	0	0	75.5777	30.0325
DUSP6	CD16_Mono	2.44353	2.00351	1.03914e+10	0.776684	0	0	70.775	19.6285
CLEC12A	CD16_Mono	2.0353	1.60155	1.03756e+10	0.775507	0	0	72.1884	19.6227
PYCARD	CD16_Mono	5.15701	3.67913	1.03519e+10	0.773731	0	0	82.0283	51.8532
HLA-DRB5	CD16_Mono	11.4738	8.80688	1.03518e+10	0.773721	0	0	84.6909	51.5305
MCTP1	CD16_Mono	1.50184	1.25793	1.03439e+10	0.773137	0	0	67.1378	14.7375
CD74	CD16_Mono	62.9622	42.4818	1.03406e+10	0.77289	0	0	97.4245	91.7421
IRAK3	CD16_Mono	1.60406	1.30454	1.03372e+10	0.772632	0	0	69.02	16.7695
C1orf162	CD16_Mono	3.91235	2.9653	1.03352e+10	0.772482	0	0	79.0843	42.1923
TCIRG1	CD16_Mono	2.35686	1.75185	1.03309e+10	0.77216	0	0	78.7461	38.0565
CD83	CD16_Mono	2.86091	2.32996	1.03297e+10	0.772075	0	0	71.197	22.0938
GPBAR1	CD16_Mono	1.63219	1.51254	1.0328e+10	0.771948	0	0	60.4361	8.13222
HLA-DPB1	CD16_Mono	12.282	9.24739	1.03062e+10	0.770312	0	0	85.9904	65.2602
DOCK2	CD16_Mono	2.27554	1.61613	1.02949e+10	0.769475	0	0	80.8226	40.7939
MT-ND2	CD16_Mono	10.3344	5.27462	1.02863e+10	0.768826	0	0	98.0005	93.4683
RAB10	CD16_Mono	2.05315	1.55801	10266365051	0.767338	0	0	75.7753	34.2433
LILRB1	CD16_Mono	1.80156	1.58641	1.02662e+10	0.767325	0	0	64.6259	16.0678
GZMH	CD4_CTL	7.92444	5.45585	3.16947e+09	0.835538	0	0	97.0395	34.873
CD3D	CD4_CTL	3.91515	2.48985	3.04308e+09	0.802218	0	0	93.6207	37.7346
CCL5	CD4_CTL	21.8558	12.1807	3.02068e+09	0.796312	0	0	99.777	57.2701
CST7	CD4_CTL	7.85272	4.37322	2.99635e+09	0.789899	0	0	99.0958	42.8602
NKG7	CD4_CTL	27.9667	15.5769	2992945750	0.789002	0	0	99.9009	53.5636
GZMA	CD4_CTL	6.1972	3.41918	2.98293e+09	0.786361	0	0	96.7298	38.8434
IL32	CD4_CTL	16.7871	8.87136	2.97485e+09	0.784231	0	0	99.5541	60.7895
CD3G	CD4_CTL	2.50316	1.62846	2956084078	0.779284	0	0	85.9408	33.6248
CD3E	CD4_CTL	6.47715	3.42635	2.9089e+09	0.766844	0	0	98.1915	49.205
FGFBP2	CD4_CTL	4.52248	2.54166	2.90822e+09	0.766667	0	0	87.1052	31.0831
KLRG1	CD4_CTL	1.60201	1.24953	2.90555e+09	0.765963	0	0	69.5404	18.8093
GZMM	CD4_CTL	2.46092	1.43862	2.87136e+09	0.75695	0	0	87.3777	40.7903
TRGV9	CD4_CTL	3.43181	3.32025	2.86542e+09	0.755384	0	0	54.5274	5.92876
PRF1	CD4_CTL	4.82014	1.94141	2.82821e+09	0.745574	0	0	92.4935	39.046
GNLY	CD4_CTL	19.1443	7.69768	2.7816e+09	0.733286	0	0	86.9565	44.4517
CTSW	CD4_CTL	4.66592	2.02833	2.75878e+09	0.727271	0	0	90.2267	43.4742
CCL4	CD4_CTL	5.24613	2.71461	2.75288e+09	0.725715	0	0	76.5143	31.7139
GZMB	CD4_CTL	4.57376	1.76376	2.73857e+09	0.721943	0	0	84.6649	35.0267
B2M	CD4_CTL	111.367	35.3058	2.73231e+09	0.720294	0	0	100	99.7738
C12orf75	CD4_CTL	1.5973	0.901589	2.70669e+09	0.713539	0	0	74.9412	34.1601
HLA-C	CD4_CTL	29.7103	9.69349	2.70422e+09	0.712887	0	0	99.9752	97.6732
HOPX	CD4_CTL	1.86436	0.94519	2.69129e+09	0.70948	0	0	73.5043	29.3554
CD99	CD4_CTL	4.46674	1.68531	2673940071	0.704905	0	0	97.4483	77.8903
LYAR	CD4_CTL	1.33234	0.828036	2.66585e+09	0.702773	0	0	66.4065	28.5767
KLRB1	CD4_CTL	2.86164	1.97825	2.65718e+09	0.700487	0	0	60.659	22.9753
LITAF	CD4_CTL	3.24972	1.34348	2.65569e+09	0.700094	0	0	92.5926	66.6844
IL2RG	CD4_CTL	3.92679	1.54609	2.64032e+09	0.696042	0	0	95.293	65.1053
CD52	CD4_CTL	10.3944	3.95315	2.63944e+09	0.695809	0	0	97.3492	81.1264
SLC9A3R1	CD4_CTL	2.39403	1.0781	2.63255e+09	0.693993	0	0	86.2257	55.718
CALM1	CD4_CTL	7.86783	2.609	2.62757e+09	0.692682	0	0	99.393	89.3745
CD2	CD4_CTL	1.89372	0.988402	2.6166e+09	0.689788	0	0	74.9783	39.5621
LCK	CD4_CTL	2.17193	0.927607	2.60289e+09	0.686174	0	0	84.4544	48.703
HCST	CD4_CTL	5.12845	1.82414	2.56785e+09	0.676938	0	0	95.8999	76.8004
IFITM1	CD4_CTL	10.3774	3.20081	2.5613e+09	0.675211	0	0	99.4178	70.937
ADGRG1	CD4_CTL	1.13229	0.621627	2551399227	0.672601	0	0	58.6151	22.7124
SAMD3	CD4_CTL	1.05438	0.57776	2543880274	0.670619	0	0	60.9315	27.1312
TRDV2	CD4_CTL	3.17453	3.1259	2538675505	0.669247	0	0	34.6216	0.928963
CTSC	CD4_CTL	2.14579	0.834732	2.5358e+09	0.668489	0	0	81.9893	53.7998
DUSP2	CD4_CTL	2.91342	1.62306	2.52371e+09	0.665302	0	0	65.0316	35.8305
HLA-B	CD4_CTL	31.7671	8.289	2.49937e+09	0.658885	0	0	99.9009	98.2042
TRBC1	CD4_CTL	2.07791	0.968431	2.49589e+09	0.657966	0	0	64.982	33.7798
PLAAT4	CD4_CTL	2.78348	0.927719	2493368012	0.657303	0	0	89.6693	64.6945
YWHAQ	CD4_CTL	1.59978	0.714183	2489854281	0.656376	0	0	74.1112	49.6579
FCRL6	CD4_CTL	0.958132	0.511198	2.48177e+09	0.654246	0	0	54.7132	22.6439
HLA-A	CD4_CTL	23.2102	5.42516	2.4782e+09	0.653304	0	0	99.8637	97.2299
PCED1B-AS1	CD4_CTL	2.50601	0.753735	2.47814e+09	0.653289	0	0	86.139	54.8418
RORA	CD4_CTL	1.07407	0.527712	2.47289e+09	0.651904	0	0	60.7457	31.0033
SYNE2	CD4_CTL	1.50142	0.609518	2.46654e+09	0.650231	0	0	71.1879	41.7544
APOBEC3G	CD4_CTL	1.16326	0.555485	2.46624e+09	0.650152	0	0	62.3188	33.7304
CXCR4	CD4_CTL	3.61439	1.89813	2.45613e+09	0.647486	0	0	69.0697	46.7384
TRBC2	CD4_CTL	2.0161	0.781426	2.44754e+09	0.645221	0	0	75.0031	47.1958
CD247	CD4_CTL	2.7836	0.679296	2.44237e+09	0.643858	0	0	84.8755	53.1782
HLA-E	CD4_CTL	10.3375	2.30508	2.42509e+09	0.639303	0	0	99.5788	95.0611
SYNE1	CD4_CTL	1.18878	0.509935	2424694854	0.639199	0	0	63.4584	36.8403
SPOCK2	CD4_CTL	1.15645	0.528181	2.4213e+09	0.638305	0	0	60.0892	32.681
PAXX	CD4_CTL	1.58491	0.59629	2421008037	0.638227	0	0	76.217	54.3455
LIME1	CD4_CTL	1.70024	0.514264	2419892158	0.637933	0	0	74.3837	44.8388
C12orf57	CD4_CTL	2.39539	0.7164	2.41527e+09	0.636716	0	0	84.38	60.0444
ITM2A	CD4_CTL	1.00248	0.503898	2412648298	0.636023	0	0	53.8709	27.5754
MYL12A	CD4_CTL	7.11656	1.73296	2.41156e+09	0.635737	0	0	98.9719	89.2826
ANXA6	CD4_CTL	1.84132	0.640714	2408672057	0.634975	0	0	77.5672	55.0378
PPP2R5C	CD4_CTL	1.45547	0.575934	2405589952	0.634163	0	0	70.7915	48.0458
TLE5	CD4_CTL	2.26025	0.654975	2.40291e+09	0.633457	0	0	84.2438	61.6463
SYTL3	CD4_CTL	1.30336	0.527744	2.39909e+09	0.632449	0	0	65.428	40.0303
MYL12B	CD4_CTL	3.60969	0.866319	2.37486e+09	0.626061	0	0	95.1939	81.3784
UBB	CD4_CTL	3.70519	0.735664	2367891729	0.624225	0	0	94.6364	80.4375
GNG2	CD4_CTL	1.5345	0.516925	2.35139e+09	0.619875	0	0	71.2746	50.1008
PFN1	CD4_CTL	18.0403	2.82629	2343025517	0.617669	4.85782e-289	5.87086e-287	99.9257	96.0852
VAMP2	CD4_CTL	1.93596	0.562495	2341874931	0.617366	0	0	83.6616	65.6433
CALR	CD4_CTL	2.09872	0.601379	2.33428e+09	0.615363	3.86211e-305	5.1088e-303	76.4771	57.9155
HSP90AA1	CD4_CTL	3.44098	0.862806	2333975347	0.615284	3.11683e-285	3.68119e-283	90.9699	77.713
CD69	CD4_CTL	3.16413	0.8923	2.33347e+09	0.615149	0	0	69.9988	47.4267
KLRD1	CD4_CTL	1.89199	0.700451	2330113125	0.614265	0	0	55.729	32.0216
RPS27	CD4_CTL	28.4714	4.60864	2.32658e+09	0.613334	3.78122e-268	3.96396e-266	99.7151	94.718
LEF1	CD4_Naive	1.70116	1.40063	18882261215	0.775246	0	0	67.6558	14.142
IL7R	CD4_Naive	4.0649	2.39547	1.88485e+10	0.773858	0	0	80.0528	23.6388
TCF7	CD4_Naive	1.71204	1.3791	1.84472e+10	0.757385	0	0	64.7246	14.7657
CCR7	CD4_Naive	1.70775	1.4167	1.82733e+10	0.750242	0	0	61.5418	12.9345
CAMK4	CD4_Naive	1.39963	1.0946	1.8258e+10	0.749616	0	0	65.2143	16.7735
TSHZ2	CD4_Naive	1.33384	1.21167	1.8084e+10	0.742472	0	0	54.1363	6.109
LTB	CD4_Naive	6.89063	3.92468	1.80785e+10	0.742245	0	0	80.658	39.6012
INPP4B	CD4_Naive	1.51035	1.17504	1.79588e+10	0.737332	0	0	63.1487	17.075
PRKCQ-AS1	CD4_Naive	1.36003	1.10112	1.78382e+10	0.732379	0	0	59.4831	15.526
MAL	CD4_Naive	1.18768	0.936263	1.75267e+10	0.719589	0	0	55.2019	11.1915
SARAF	CD4_Naive	6.11406	2.99705	16839864317	0.691391	0	0	88.2306	80.3683
PIK3IP1	CD4_Naive	1.18218	0.813503	1.6817e+10	0.690453	0	0	58.6986	23.9583
LDHB	CD4_Naive	4.45071	2.40249	1.67157e+10	0.686294	0	0	76.0043	61.3417
OXNAD1	CD4_Naive	0.862961	0.652688	1.67005e+10	0.685668	0	0	50.8104	15.0719
NOSIP	CD4_Naive	2.28648	1.34745	1.66582e+10	0.683933	0	0	68.9265	44.1577
BCL11B	CD4_Naive	1.02247	0.679579	1.66296e+10	0.682757	0	0	57.2071	22.3372
BCL2	CD4_Naive	1.14206	0.830839	1.63649e+10	0.671889	0	0	51.5432	19.0852
BACH2	CD4_Naive	0.962102	0.621448	1.63381e+10	0.670791	0	0	49.0793	14.9031
ABLIM1	CD4_Naive	1.07952	0.730477	1.63129e+10	0.669755	0	0	53.826	21.895
PCED1B	CD4_Naive	1.07493	0.704441	1.63039e+10	0.669385	0	0	55.7071	24.5103
CD27	CD4_Naive	0.856116	0.513726	1.62144e+10	0.665712	0	0	48.4465	14.7085
CD3E	CD4_Naive	4.6939	1.80416	1.61691e+10	0.663851	0	0	79.7562	45.9274
FOXP1	CD4_Naive	2.37343	1.07446	1.61607e+10	0.663509	0	0	80.3373	58.8464
RCAN3	CD4_Naive	0.723611	0.524654	1.61145e+10	0.661608	0	0	45.2016	13.3305
PCED1B-AS1	CD4_Naive	3.10954	1.53022	1.61142e+10	0.661599	0	0	75.8647	52.54
LEPROTL1	CD4_Naive	1.53798	0.830302	1.60789e+10	0.660148	0	0	65.7316	40.7607
GAS5	CD4_Naive	2.92198	1.55875	1.60356e+10	0.65837	0	0	70.718	56.0933
FLT3LG	CD4_Naive	1.16025	0.687319	1.6035e+10	0.658346	0	0	56.4623	27.6099
ITK	CD4_Naive	0.979068	0.591304	1.59502e+10	0.654863	0	0	54.0174	24.3272
CD3D	CD4_Naive	2.10068	0.720784	1.59447e+10	0.654641	0	0	69.8645	34.3716
TC2N	CD4_Naive	0.93286	0.562598	1.59356e+10	0.654263	0	0	52.7949	22.8977
SELL	CD4_Naive	2.26863	1.0461	1.59197e+10	0.65361	0	0	68.6489	43.621
RHOH	CD4_Naive	1.15737	0.627052	1.58951e+10	0.652603	0	0	59.3555	31.0922
PDE3B	CD4_Naive	0.914945	0.6122	1.58561e+10	0.651001	0	0	48.8724	20.2267
LINC00861	CD4_Naive	1.17551	0.631818	1.5841e+10	0.650379	0	0	59.3727	31.2999
SERINC5	CD4_Naive	0.753302	0.532094	1.58345e+10	0.650113	0	0	44.8791	15.9277
CD69	CD4_Naive	3.79087	1.71168	1.57055e+10	0.644816	0	0	69.2455	44.8473
NDFIP1	CD4_Naive	1.47769	0.719896	1.56015e+10	0.640548	0	0	66.6851	46.1912
ANK3	CD4_Naive	0.667333	0.54627	1.55972e+10	0.640372	0	0	35.8719	8.16375
EEF1B2	CD4_Naive	10.831	4.84347	1.54595e+10	0.634717	0	0	78.8717	87.9063
RPL32	CD4_Naive	42.5833	15.7134	1.54118e+10	0.632761	0	0	90.2514	96.7994
FHIT	CD4_Naive	0.692369	0.530615	1.53829e+10	0.631573	0	0	36.5616	11.0081
RPS12	CD4_Naive	59.4871	23.142	1.53803e+10	0.631464	0	0	92.8377	97.7431
ARHGAP15	CD4_Naive	2.72989	1.20146	1.53647e+10	0.630824	0	0	80.5166	63.4884
MAML2	CD4_Naive	1.12223	0.605062	1.5349e+10	0.630182	0	0	54.8691	31.3858
RPL30	CD4_Naive	42.7555	14.5838	1.53312e+10	0.62945	0	0	90.6048	97.0954
MT-ND4L	CD4_Naive	8.90519	1.86004	1.5281e+10	0.627387	0	0	99.0241	92.1522
C12orf57	CD4_Naive	2.73234	1.18504	1.5257e+10	0.626406	0	0	70.2714	59.0998
RPS5	CD4_Naive	16.1645	6.56635	1.5228e+10	0.625214	0	0	81.3425	91.531
RPL5	CD4_Naive	17.1992	6.22601	1.515e+10	0.62201	0	0	85.0322	93.9479
NPM1	CD4_Naive	4.5713	1.75066	1.51321e+10	0.621276	0	0	77.3699	77.2716
MALAT1	CD4_Naive	83.5225	19.9184	1.50626e+10	0.618424	0	0	99.9914	99.2837
RPS25	CD4_Naive	18.8863	6.6997	1.50602e+10	0.618324	0	0	85.5978	93.7474
TMEM123	CD4_Naive	1.22461	0.528766	1.50509e+10	0.617943	0	0	59.9883	40.3301
RPS3A	CD4_Naive	31.1955	11.1066	1.49819e+10	0.61511	0	0	88.7962	96.1917
RPS27A	CD4_Naive	36.2813	10.6725	1.49745e+10	0.614804	0	0	91.3583	97.3095
GIMAP5	CD4_Naive	1.21877	0.531227	1.49499e+10	0.613794	0	0	57.0347	36.9867
MT-CYB	CD4_Naive	18.5653	2.9791	1.49185e+10	0.612507	0	0	99.8345	98.6103
RPS6	CD4_Naive	19.766	7.01692	1.48764e+10	0.610777	0	0	86.1599	93.5202
RPL13	CD4_Naive	41.0865	13.3084	1.48277e+10	0.608779	0	0	92.8635	97.289
RPL3	CD4_Naive	16.7115	5.70316	1.47731e+10	0.606536	0	0	84.9012	91.9515
RPS3	CD4_Naive	29.9494	8.79492	1.47674e+10	0.606304	0	0	89.0634	96.2748
RPL9	CD4_Naive	13.7954	4.58821	1.47604e+10	0.606015	0	0	82.2046	92.9233
SKAP1	CD4_Naive	1.7033	0.516694	14752507877	0.605691	0	0	71.4128	48.2874
RPS14	CD4_Naive	34.7176	10.196	1.47341e+10	0.604933	0	0	89.3565	96.8268
DOCK10	CD4_Naive	1.18949	0.517456	1.4731e+10	0.604809	0	0	58.2951	40.638
RPS15A	CD4_Naive	36.1278	9.9055	1.47231e+10	0.604483	0	0	90.26	97.0375
SNHG29	CD4_Naive	3.63452	1.27858	1.47136e+10	0.604095	0	0	73.5146	74.7741
RPL11	CD4_Naive	34.154	9.25777	1.46929e+10	0.603244	0	0	90.2462	97.0063
RPL34	CD4_Naive	32.1076	8.99817	1.46699e+10	0.602299	0	0	89.2893	96.5025
RPL14	CD4_Naive	19.3821	5.24838	1.46619e+10	0.601973	0	0	86.872	95.1107
MT-CO2	CD4_Proliferating	107.625	80.2224	4.09539e+08	0.932157	0	0	99.8914	99.6214
MT-CO1	CD4_Proliferating	143.931	103.463	4.06192e+08	0.924539	0	0	100	99.7705
MT-CO3	CD4_Proliferating	82.4473	63.6785	4.06162e+08	0.924471	0	0	100	99.2491
MT-CYB	CD4_Proliferating	61.3746	45.5146	4.04868e+08	0.921525	0	0	99.8914	98.7567
STMN1	CD4_Proliferating	18.8664	18.6192	4.04748e+08	0.921252	0	0	88.0565	13.771
MT-ND4L	CD4_Proliferating	26.6634	19.43	3.94422e+08	0.897749	0	0	99.5657	92.9734
RRM2	CD4_Proliferating	8.32356	8.28191	3.94213e+08	0.897272	0	0	80.456	2.41221
HMGB2	CD4_Proliferating	16.7796	16.0953	3.92205e+08	0.892702	0	0	90.0109	40.6772
MKI67	CD4_Proliferating	4.62541	4.60093	390443363	0.888693	0	0	78.3931	1.24856
SMC4	CD4_Proliferating	3.69924	3.54869	3.81644e+08	0.868664	0	0	79.0445	12.264
SKAP1	CD4_Proliferating	5.46254	4.22137	3.78666e+08	0.861887	0	0	94.8969	51.0091
HNRNPA2B1	CD4_Proliferating	20.9294	17.4024	3.77139e+08	0.858411	0	0	96.9598	87.583
TUBA1B	CD4_Proliferating	29.4951	28.0216	3.76487e+08	0.856927	0	0	91.3138	58.9926
DDX39A	CD4_Proliferating	3.77959	3.34145	3.75523e+08	0.854733	0	0	84.3648	33.0234
MT-ND5	CD4_Proliferating	13.975	9.27058	3.7519e+08	0.853975	1.63916e-305	1.51725e-303	99.24	91.4041
DNMT1	CD4_Proliferating	3.23344	2.89629	3.72461e+08	0.847764	0	0	81.759	26.0132
TUBB	CD4_Proliferating	19.1488	18.1333	3.71711e+08	0.846057	0	0	87.6221	52.7029
DEK	CD4_Proliferating	6.4886	5.61854	3.70796e+08	0.843973	0	0	87.8393	50.1332
H2AFV	CD4_Proliferating	7.8089	7.17872	3.70449e+08	0.843185	0	0	83.4962	41.4902
ATAD2	CD4_Proliferating	2.42345	2.34049	3.67361e+08	0.836155	0	0	71.0098	7.33307
SRSF10	CD4_Proliferating	3.70467	2.9618	366977554	0.835282	0	0	88.165	48.9964
PRKCH	CD4_Proliferating	4.9772	3.91824	3.66626e+08	0.834482	0	0	91.2052	46.9028
LMNB1	CD4_Proliferating	3.3127	3.14902	3.65771e+08	0.832536	0	0	73.0727	13.0067
HMGN2	CD4_Proliferating	26.8578	24.8973	3.6478e+08	0.830281	2.9791e-276	2.44629e-274	91.5309	72.3483
EZH2	CD4_Proliferating	2.12812	2.05282	3.64586e+08	0.829839	0	0	69.5983	6.57819
NUCKS1	CD4_Proliferating	4.62866	3.92353	3.64461e+08	0.829555	0	0	84.3648	44.8478
TMPO	CD4_Proliferating	3.14224	2.79013	364153229	0.828854	0	0	78.9359	25.8057
RAD21	CD4_Proliferating	4.37676	3.80465	3.64137e+08	0.828816	0	0	83.279	39.6643
SYNE2	CD4_Proliferating	4.68838	3.79349	3.63086e+08	0.826425	0	0	86.9707	42.1652
ANP32E	CD4_Proliferating	3.962	3.66801	3.62429e+08	0.824929	0	0	75.57	23.2406
RRM1	CD4_Proliferating	2.23344	2.13217	3.62026e+08	0.824013	0	0	69.7068	8.90739
MCM7	CD4_Proliferating	3.73073	3.60778	3.61835e+08	0.823577	0	0	70.0326	10.2488
NASP	CD4_Proliferating	3.44843	3.11737	3.61053e+08	0.821798	0	0	77.0901	25.6686
ARHGAP15	CD4_Proliferating	7.06949	5.40568	3.60871e+08	0.821383	6.86379e-267	5.35803e-265	94.1368	65.4995
PTPRC	CD4_Proliferating	14.3333	9.41503	3.60865e+08	0.82137	6.18229e-252	4.30006e-250	98.5885	91.0607
RORA	CD4_Proliferating	3.38111	2.83129	3.60834e+08	0.821299	0	0	82.6276	31.407
CYTOR	CD4_Proliferating	2.6645	2.23774	3.60181e+08	0.819812	0	0	80.2389	28.5506
HMGB1	CD4_Proliferating	23.6145	20.6852	3.5995e+08	0.819287	5.28028e-252	3.6797e-250	95.114	85.6238
IDH2	CD4_Proliferating	4.83822	4.27681	3.59862e+08	0.819087	0	0	80.9989	36.5666
TYMS	CD4_Proliferating	5.89902	5.87312	358119556	0.81512	0	0	63.6265	0.903715
HNRNPR	CD4_Proliferating	3.57438	2.97618	3.58109e+08	0.815097	0	0	82.4104	40.9569
TAF15	CD4_Proliferating	2.97611	2.31946	3.58095e+08	0.815064	2.04144e-300	1.83816e-298	85.7763	43.6936
CELF2	CD4_Proliferating	4.80673	3.33076	3.57633e+08	0.814014	3.41662e-255	2.44658e-253	92.9425	67.3101
LCP1	CD4_Proliferating	9.78827	7.09213	357372514	0.81342	2.53708e-244	1.67194e-242	94.8969	77.6314
CLSPN	CD4_Proliferating	1.97611	1.95933	357001276	0.812575	0	0	63.3008	1.21208
SH3KBP1	CD4_Proliferating	3.3127	2.32736	3.56419e+08	0.81125	2.14333e-265	1.65537e-263	89.7937	55.7683
ANP32B	CD4_Proliferating	8.95874	7.5819	3.56208e+08	0.810769	1.97975e-252	1.38762e-250	87.8393	63.8504
NUSAP1	CD4_Proliferating	3.05646	3.03409	3.55914e+08	0.8101	0	0	63.0836	1.78647
NAP1L4	CD4_Proliferating	2.48426	2.01662	3.55782e+08	0.809801	0	0	80.7818	33.7423
LBR	CD4_Proliferating	2.65147	2.26032	3.55662e+08	0.809527	0	0	77.8502	29.7639
PTTG1	CD4_Proliferating	4.36482	4.27634	3.55215e+08	0.808508	0	0	65.3637	6.91171
HELLS	CD4_Proliferating	1.66884	1.62965	3.55004e+08	0.80803	0	0	63.7351	3.38867
SMCHD1	CD4_Proliferating	4.27362	3.05477	3.54886e+08	0.807761	2.43594e-252	1.70408e-250	90.8795	60.1785
FANCI	CD4_Proliferating	1.48969	1.45919	3.53875e+08	0.805459	0	0	62.8664	2.77906
DUT	CD4_Proliferating	7.31813	6.77953	3.53754e+08	0.805185	0	0	78.3931	36.5949
RALY	CD4_Proliferating	3.80022	2.95833	3.53497e+08	0.8046	1.64795e-261	1.24373e-259	86.4278	52.0981
MIR4435-2HG	CD4_Proliferating	2.4506	2.16101	3.53177e+08	0.803872	0	0	72.9642	21.0123
HNRNPA3	CD4_Proliferating	6.84148	5.56127	353076990	0.803643	6.76575e-243	4.38712e-241	87.405	62.7395
EWSR1	CD4_Proliferating	3.41694	2.68954	3.53036e+08	0.803549	3.06887e-271	2.44817e-269	84.6906	46.4605
IFI16	CD4_Proliferating	3.26059	2.54231	3.52905e+08	0.803252	3.45701e-277	2.85808e-275	84.1477	43.6479
EML4	CD4_Proliferating	2.78067	2.10527	3.5287e+08	0.803171	8.92895e-283	7.53616e-281	83.9305	41.808
CENPF	CD4_Proliferating	2.47991	2.46188	3.52726e+08	0.802844	0	0	61.3464	1.16722
TPM4	CD4_Proliferating	4.61129	3.77597	3.52528e+08	0.802393	8.18498e-278	6.78235e-276	82.519	42.4193
PCLAF	CD4_Proliferating	3.24539	3.22724	3.52509e+08	0.802351	0	0	61.1292	0.998048
PRKDC	CD4_Proliferating	2.53637	2.18316	3.52011e+08	0.801217	0	0	75.2443	27.1083
MYH9	CD4_Proliferating	5.95983	4.29616	3.51959e+08	0.801098	1.70376e-233	1.03124e-231	92.3996	67.3866
NSD2	CD4_Proliferating	1.57438	1.49327	3.51679e+08	0.800462	0	0	64.7123	7.2511
MT-ATP6	CD4_Proliferating	43.5928	29.7969	3.51177e+08	0.799318	3.24242e-217	1.7474e-215	99.4571	97.9702
HNRNPD	CD4_Proliferating	2.32573	1.95823	3.5117e+08	0.799303	0	0	75.8958	28.151
SMC3	CD4_Proliferating	2.12921	1.90247	3.51152e+08	0.799261	0	0	70.684	18.8319
ELOVL5	CD4_Proliferating	2.40608	1.93998	3.50903e+08	0.798694	0	0	78.5016	33.2025
NIBAN1	CD4_Proliferating	2.15852	1.80383	3.50501e+08	0.797779	0	0	74.9186	24.3523
LIME1	CD4_Proliferating	6.85776	5.67404	3.50223e+08	0.797147	3.74139e-257	2.71658e-255	82.519	45.266
CENPM	CD4_Proliferating	2.34202	2.30367	3.5022e+08	0.797141	0	0	61.4549	3.26478
PPM1G	CD4_Proliferating	3.28122	2.70013	3.49371e+08	0.795209	1.35965e-275	1.11146e-273	79.4788	40.0636
CDC25B	CD4_Proliferating	3.85993	3.36215	3.49108e+08	0.794609	0	0	75.6786	30.0758
YWHAQ	CD4_Proliferating	5.35505	4.466	348979998	0.794318	5.75117e-246	3.83169e-244	82.7362	50.0079
MCM3	CD4_Proliferating	2.60261	2.47144	3.48859e+08	0.794042	0	0	65.3637	11.3485
KIF22	CD4_Proliferating	2.43974	2.22698	3.48724e+08	0.793736	0	0	69.164	17.6789
NOP58	CD4_Proliferating	2.18784	1.78216	3.48449e+08	0.793109	0	0	76.4387	30.0073
EIF3A	CD4_Proliferating	2.82628	2.15037	3.48366e+08	0.79292	1.67477e-263	1.26923e-261	82.3018	42.0451
PARP1	CD4_Proliferating	2.84256	2.3945	3.48339e+08	0.792858	1.69471e-307	1.58073e-305	76.0043	31.931
XRCC5	CD4_Proliferating	4.20195	3.22133	3.48219e+08	0.792585	5.21094e-234	3.17518e-232	85.342	56.7883
SRSF4	CD4_Proliferating	2.36808	1.82021	3.47107e+08	0.790054	3.98628e-269	3.14553e-267	80.5646	39.339
HSP90AA1	CD4_Proliferating	12.494	9.9204	3.47021e+08	0.789858	2.05075e-209	1.03755e-207	92.0738	77.9096
ATXN1	CD4_Proliferating	2.83605	2.35182	3.47011e+08	0.789837	8.5362e-300	7.64831e-298	77.4159	32.0325
MT-ND1	CD4_Proliferating	16.2899	9.14724	3.46965e+08	0.789732	1.86967e-204	8.84433e-203	99.24	95.6263
H2AFZ	CD4_Proliferating	14.1205	12.9611	3.46964e+08	0.789728	2.07353e-226	1.18785e-224	82.1933	57.8396
NUDT1	CD4_Proliferating	2.68078	2.44978	3.46885e+08	0.78955	0	0	68.0782	19.2336
TPR	CD4_Proliferating	3.30945	2.59459	3.46869e+08	0.789513	3.3139e-255	2.37771e-253	81.8675	42.7574
CENPK	CD4_Proliferating	1.5038	1.37252	3.46852e+08	0.789473	0	0	65.2552	10.8031
MCM5	CD4_Proliferating	2.84148	2.69887	3.46745e+08	0.789231	0	0	64.8208	11.9022
CARHSP1	CD4_Proliferating	2.82845	2.57757	3.46647e+08	0.789007	0	0	69.164	20.2438
MBNL1	CD4_Proliferating	7.02823	4.49052	3.46312e+08	0.788245	4.01431e-207	1.9707e-205	95.9826	81.7465
SEPTIN6	CD4_Proliferating	3.443	2.56748	3.45985e+08	0.787502	6.16813e-235	3.79658e-233	84.2562	49.9854
CDC42SE2	CD4_Proliferating	3.0836	2.21367	345800007	0.78708	8.64944e-233	5.20928e-231	85.6678	51.3656
GNG2	CD4_Proliferating	3.35505	2.33324	3.45694e+08	0.786839	2.00116e-231	1.18948e-229	87.6221	50.3867
HNRNPU	CD4_Proliferating	4.46254	3.28982	345597078	0.786618	2.40859e-220	1.32552e-218	87.0793	59.1391
STAG1	CD4_Proliferating	2.50706	2.1204	3.45593e+08	0.786609	0	0	75.1357	28.4212
PDIA6	CD4_Proliferating	3.2747	2.69134	3.45492e+08	0.786379	1.55159e-269	1.227e-267	76.873	37.0016
IL7R	CD4_TCM	9.56343	8.31855	1.6272e+10	0.906383	0	0	94.8364	24.4309
LTB	CD4_TCM	14.2612	11.8368	1.62278e+10	0.903921	0	0	98.3477	39.5257
LDHB	CD4_TCM	7.09167	5.19893	15791535117	0.879622	0	0	98.1604	59.8248
RPS12	CD4_TCM	81.2947	46.1056	1.53044e+10	0.852485	0	0	99.9951	96.88
RPS27A	CD4_TCM	50.9293	26.2854	15128329372	0.84268	0	0	99.9976	96.2665
RPSA	CD4_TCM	22.2542	13.2986	15121605671	0.842305	0	0	99.8345	89.3691
RPL10	CD4_TCM	89.6573	47.3967	1.51064e+10	0.841459	0	0	99.9976	97.6484
RPL30	CD4_TCM	56.3997	28.9472	1.50629e+10	0.839034	0	0	99.9951	95.9609
RPL14	CD4_TCM	28.4331	14.9477	1.50123e+10	0.836218	0	0	99.983	93.5585
RPS25	CD4_TCM	26.5918	14.8708	1.49899e+10	0.834972	0	0	99.9051	92.0862
RPS15A	CD4_TCM	51.6133	26.4645	14981202437	0.834485	0	0	99.9951	95.8595
RPL5	CD4_TCM	23.438	12.8107	1.49716e+10	0.833952	0	0	99.9173	92.2027
EEF1A1	CD4_TCM	125.002	69.592	1.49709e+10	0.833912	0	0	99.9976	98.3091
CD3E	CD4_TCM	7.67524	4.99614	1.49388e+10	0.832124	0	0	98.8441	45.4407
RPL32	CD4_TCM	55.0107	28.7018	1.49383e+10	0.832096	0	0	99.9951	95.6295
RPS4X	CD4_TCM	32.8506	17.5259	1.49229e+10	0.831236	0	0	99.9635	93.5189
RPS3	CD4_TCM	42.4491	22.1301	1.49193e+10	0.831036	0	0	99.9878	94.9681
RPL11	CD4_TCM	47.6976	23.7171	1.483e+10	0.82606	0	0	99.9878	95.8284
RPL34	CD4_TCM	45.2715	23.0522	1.47781e+10	0.82317	0	0	99.9854	95.2172
RPL13	CD4_TCM	56.7123	29.8892	1.47513e+10	0.821678	0	0	99.9927	96.4471
RPS8	CD4_TCM	55.5701	28.6001	1.47425e+10	0.821188	0	0	99.9976	96.2926
RPLP0	CD4_TCM	26.052	14.566	1.4703e+10	0.818987	0	0	99.9051	92.1592
RPS18	CD4_TCM	38.7836	21.5192	1.46992e+10	0.818777	0	0	99.9611	93.4203
RPL36	CD4_TCM	20.8629	11.0175	1.46651e+10	0.816878	0	0	99.8005	91.6472
RPS5	CD4_TCM	20.6262	11.1937	1.46639e+10	0.816812	0	0	99.8297	89.3977
CD3D	CD4_TCM	3.7223	2.46707	1.46204e+10	0.814385	0	0	93.7997	33.4933
TPT1	CD4_TCM	40.0035	21.0781	1.45896e+10	0.812672	0	0	99.9732	95.8666
RPL18	CD4_TCM	31.3775	15.2245	1.45552e+10	0.810754	0	0	99.9878	94.4545
RPS27	CD4_TCM	45.3798	23.4559	1.45442e+10	0.810143	0	0	99.9343	94.3197
RPL19	CD4_TCM	46.7488	22.1394	1.45417e+10	0.810005	0	0	100	95.8939
RPS6	CD4_TCM	26.8648	14.512	1.45331e+10	0.809523	0	0	99.8394	91.9486
RPS7	CD4_TCM	29.6464	13.7237	1.45044e+10	0.807925	0	0	99.9878	94.5689
HINT1	CD4_TCM	5.94491	3.48117	14497579825	0.807546	0	0	97.7078	76.7693
RPS14	CD4_TCM	45.9128	22.0498	1.44806e+10	0.8066	0	0	99.9951	95.537
SARAF	CD4_TCM	7.4238	4.31403	1.44776e+10	0.806434	0	0	98.0874	79.7453
RPS3A	CD4_TCM	39.3635	19.6132	1.44617e+10	0.805547	0	0	99.9805	94.8535
RPL18A	CD4_TCM	37.4133	18.1774	1.44586e+10	0.805375	0	0	99.9878	94.6708
RPL10A	CD4_TCM	16.7439	8.91881	1.44428e+10	0.804496	0	0	99.6958	88.3296
RPS21	CD4_TCM	21.5565	10.8898	1.44295e+10	0.803754	0	0	99.764	92.1741
RPS28	CD4_TCM	38.1149	18.0631	1.44135e+10	0.802861	0	0	99.9757	94.7653
RPL3	CD4_TCM	23.0936	12.4649	1.43992e+10	0.802068	0	0	99.798	90.2774
RPL6	CD4_TCM	26.6877	12.5723	1.43829e+10	0.80116	0	0	99.944	94.0626
IL32	CD4_TCM	18.0679	10.9433	1.43659e+10	0.800213	0	0	99.0972	57.9022
FXYD5	CD4_TCM	8.50303	4.58039	1.43616e+10	0.79997	0	0	99.1386	86.7307
EEF1B2	CD4_TCM	13.0754	7.11165	1.436e+10	0.799885	0	0	99.4622	85.6198
RPL35A	CD4_TCM	27.5508	12.8133	1.42991e+10	0.796488	0	0	99.9489	93.846
RPL28	CD4_TCM	57.8608	25.8438	1.4271e+10	0.794924	0	0	99.9976	96.828
RPL39	CD4_TCM	39.6762	18.6679	1.42672e+10	0.794712	0	0	99.9781	94.6584
RPS23	CD4_TCM	37.619	17.4679	1.42204e+10	0.792107	0	0	99.9684	94.4064
AQP3	CD4_TCM	1.93437	1.70447	1.42187e+10	0.792014	0	0	67.5995	11.3653
RPL13A	CD4_TCM	17.1059	8.75521	1.42171e+10	0.791923	0	0	99.7834	91.7547
RPL9	CD4_TCM	17.9028	8.90445	1.42127e+10	0.79168	0	0	99.7445	90.8586
RPLP2	CD4_TCM	27.7462	12.7881	1.4198e+10	0.790859	0	0	99.9854	94.8322
RPL12	CD4_TCM	31.3511	14.2967	1.41942e+10	0.790648	0	0	99.9927	94.8905
RPL29	CD4_TCM	31.1258	14.2714	1.41752e+10	0.78959	0	0	99.9781	94.172
RPL22	CD4_TCM	15.9593	7.52486	1.41728e+10	0.789453	0	0	99.8321	91.2168
NPM1	CD4_TCM	6.09266	3.34741	1.41654e+10	0.789043	0	0	97.6445	75.3681
NOSIP	CD4_TCM	3.22845	2.3259	1.41643e+10	0.788982	0	0	84.823	43.6207
PCED1B-AS1	CD4_TCM	4.14398	2.60277	1.4101e+10	0.785455	0	0	92.7874	51.8506
LIME1	CD4_TCM	3.0037	1.97922	14093386972	0.785032	0	0	88.2321	41.3028
RPL7A	CD4_TCM	28.8979	12.664	1.40896e+10	0.784821	0	0	99.9805	94.4781
MAL	CD4_TCM	1.6411	1.39611	1.40844e+10	0.78453	0	0	67.67	11.7215
RPS15	CD4_TCM	31.3779	13.6964	1.40769e+10	0.784115	0	0	99.9732	95.0203
FLT3LG	CD4_TCM	1.82463	1.3876	1.40635e+10	0.783369	0	0	76.9266	26.8012
INPP4B	CD4_TCM	1.69697	1.33376	1.40503e+10	0.782633	0	0	72.3616	17.991
RPL37	CD4_TCM	29.8783	13.8366	1.40432e+10	0.782233	0	0	99.8808	93.8273
RPL24	CD4_TCM	14.8991	6.75249	1.40192e+10	0.780902	0	0	99.8783	91.462
RPL17	CD4_TCM	16.9413	8.20843	1.40126e+10	0.780532	0	0	99.6983	91.473
RPL8	CD4_TCM	28.7456	12.6929	1.39814e+10	0.778793	0	0	99.9684	94.4373
RPL23A	CD4_TCM	17.0245	8.21501	1.3975e+10	0.778437	0	0	99.6399	90.1599
EEF1G	CD4_TCM	8.92714	4.59378	1.397e+10	0.778157	0	0	98.8052	84.3663
RPS29	CD4_TCM	10.5412	5.69434	1.39662e+10	0.777945	0	0	98.1725	83.3543
RPLP1	CD4_TCM	75.4032	34.3366	1.39405e+10	0.776518	0	0	99.9927	97.9078
RPL4	CD4_TCM	9.28047	4.9058	1.39371e+10	0.776325	0	0	98.4645	84.1376
CD3G	CD4_TCM	2.22161	1.44352	1.39334e+10	0.776118	0	0	84.0589	29.8473
GSTK1	CD4_TCM	4.6154	2.74547	1.39216e+10	0.775462	0	0	94.1355	70.9965
RPS16	CD4_TCM	16.8791	7.92336	1.39148e+10	0.775081	0	0	99.7567	91.0797
RACK1	CD4_TCM	18.1889	8.14345	1.38844e+10	0.773393	0	0	99.8929	92.1194
RPL21	CD4_TCM	21.7362	9.91195	1.38329e+10	0.770522	0	0	99.7469	92.587
RPS19	CD4_TCM	36.0134	16.5235	1.38292e+10	0.770315	0	0	99.9538	94.6321
TCF7	CD4_TCM	1.81158	1.43464	1.38253e+10	0.770099	0	0	69.1349	16.2838
RPL36A	CD4_TCM	13.5041	6.58472	1.37933e+10	0.768314	0	0	99.3308	88.9657
GAS5	CD4_TCM	3.44	2.06519	13772540394	0.76716	0	0	90.3638	54.8111
RPS13	CD4_TCM	35.2947	14.563	1.36963e+10	0.762912	0	0	99.9976	94.8038
RPS4Y1	CD4_TCM	6.621	3.37825	1.36401e+10	0.75978	0	0	94.8315	76.7482
SPOCK2	CD4_TCM	1.78674	1.25769	13603583172	0.757748	0	0	75.9362	29.1185
EEF2	CD4_TCM	9.65297	5.04648	1.35733e+10	0.756062	0	0	97.3014	82.8333
RPS20	CD4_TCM	6.18503	3.23435	1.35265e+10	0.753453	0	0	96.1893	77.3727
TLE5	CD4_TCM	3.43672	1.99162	1.35224e+10	0.753226	0	0	91.0232	59.3004
IFITM1	CD4_TCM	13.2256	6.55885	1.35047e+10	0.752241	0	0	99.197	68.8049
LEF1	CD4_TCM	1.53396	1.1635	1.34772e+10	0.75071	0	0	66.0762	16.3612
HSPA8	CD4_TCM	8.21278	4.32718	1.34661e+10	0.750091	0	0	96.1747	78.0567
EEF1D	CD4_TCM	9.84859	4.02133	1.34562e+10	0.749539	0	0	99.6009	90.7803
RPL35	CD4_TCM	12.178	5.31001	1.3452e+10	0.749306	0	0	99.4063	89.7497
RPL41	CD4_TCM	73.8051	32.7417	1.3445e+10	0.748913	0	0	99.9611	96.9072
CD52	CD4_TCM	11.7717	5.75888	1.34342e+10	0.748312	0	0	98.8052	79.7632
CAMK4	CD4_TCM	1.33931	0.986251	1.34187e+10	0.747451	0	0	67.1761	18.4632
RPL38	CD4_TCM	8.45098	4.05574	1.33834e+10	0.745481	0	0	97.6688	84.0181
C12orf57	CD4_TCM	3.35226	1.81743	1.33055e+10	0.741144	0	0	90.5852	57.6211
TRAT1	CD4_TCM	1.04185	0.876777	1.329e+10	0.740281	0	0	58.0533	11.0022
GZMK	CD4_TEM	6.72192	6.20265	1.45113e+09	0.918151	0	0	89.8799	8.81839
IL7R	CD4_TEM	11.0655	9.16923	1.40798e+09	0.890848	0	0	95.2553	30.03
IL32	CD4_TEM	18.7718	10.7813	1.27626e+09	0.807506	0	0	99.8498	61.1748
LTB	CD4_TEM	9.38589	5.98538	1.25069e+09	0.791328	0	0	91.982	44.2508
CD3E	CD4_TEM	6.88138	3.79918	1.23806e+09	0.783336	0	0	99.3093	49.6867
CD3D	CD4_TEM	3.10541	1.64954	1.20628e+09	0.763232	0	0	92.8529	38.2985
RPS3	CD4_TEM	36.2556	14.1323	1.19535e+09	0.756316	0	0	99.97	95.3677
LYAR	CD4_TEM	1.77868	1.26923	1.19121e+09	0.753696	0	0	73.4835	28.9051
CD2	CD4_TEM	2.33934	1.42727	1.19087e+09	0.75348	0	0	84.2342	39.8511
RPS27	CD4_TEM	39.7985	15.9691	1.17921e+09	0.746105	0	0	99.97	94.7662
RPS27A	CD4_TEM	41.8438	15.0447	1.17865e+09	0.745752	0	0	100	96.5634
RPS12	CD4_TEM	62.2778	23.2867	1.1768e+09	0.744576	0	0	100	97.1278
PCED1B-AS1	CD4_TEM	3.72252	1.97125	1.17671e+09	0.744524	0	0	91.982	55.1135
RPS25	CD4_TEM	21.1261	8.18355	1.17101e+09	0.740913	0	0	99.8498	92.7087
LDHB	CD4_TEM	4.35375	2.02813	1164743778	0.73695	0	0	93.8739	62.9052
RPSA	CD4_TEM	16.5892	6.53575	1.15673e+09	0.731878	0	0	99.7898	90.2021
RPL30	CD4_TEM	44.9381	15.1019	1.15486e+09	0.730694	0	0	100	96.2819
RPL14	CD4_TEM	22.4901	7.77368	1.14738e+09	0.725963	0	0	99.9399	94.07
CD3G	CD4_TEM	1.89069	0.995418	1.14525e+09	0.724617	0	0	80.3904	34.1866
RPS15A	CD4_TEM	40.7171	13.3861	1.14228e+09	0.722737	0	0	100	96.1885
RPLP0	CD4_TEM	20.1318	7.44531	1.13937e+09	0.720894	0	0	99.97	92.7751
EEF1A1	CD4_TEM	94.5847	33.4238	1.13404e+09	0.717523	0	0	100	98.4434
RPL3	CD4_TEM	18.5255	6.87297	1.13089e+09	0.715528	0	0	99.9399	91.0339
BTG1	CD4_TEM	7.83724	3.31185	1.12989e+09	0.714899	0	0	98.1982	86.78
ZFP36L2	CD4_TEM	7.48408	3.72384	1129374709	0.714572	0	0	95.045	80.9731
RPS4X	CD4_TEM	25.0255	8.25138	1.12844e+09	0.713983	0	0	100	94.0315
RPL10	CD4_TEM	67.5324	21.3453	1.12756e+09	0.713421	0	0	99.97	97.8355
RPS18	CD4_TEM	29.3453	10.3025	1.12627e+09	0.71261	0	0	99.9399	93.9409
CXCR4	CD4_TEM	4.36036	2.63037	1.12512e+09	0.711882	0	0	80.6907	46.88
LIME1	CD4_TEM	2.23303	1.04566	1124390211	0.711418	0	0	84.5946	45.0624
RPL23A	CD4_TEM	14.6568	5.17702	1122874665	0.710459	0	0	99.8498	90.9128
RPS14	CD4_TEM	37.0985	11.4192	1.11769e+09	0.707177	0	0	100	95.8917
RPS29	CD4_TEM	8.77838	3.4661	1.11605e+09	0.706139	0	0	98.3183	84.5323
RPS21	CD4_TEM	17.2261	5.66258	1.11316e+09	0.70431	0	0	99.7898	92.7778
HINT1	CD4_TEM	4.47147	1.72041	1.11167e+09	0.703369	0	0	96.6667	78.4426
RPL13	CD4_TEM	42.8889	13.5906	1.11058e+09	0.702679	0	0	100	96.7292
GIMAP5	CD4_TEM	1.70781	0.962512	1.10678e+09	0.700274	0	0	73.964	39.1771
RPS19	CD4_TEM	31.4715	10.635	1.10583e+09	0.699672	0	0	99.97	95.0554
RPL36	CD4_TEM	15.8991	5.14229	1.10489e+09	0.699083	0	0	99.9099	92.2951
SPOCK2	CD4_TEM	1.45435	0.8229	1.10328e+09	0.698064	0	0	70.8108	32.8796
RPL5	CD4_TEM	16.9108	5.21845	1.10317e+09	0.69799	0	0	99.97	92.8162
RPL34	CD4_TEM	34.5589	10.4302	1.10182e+09	0.697136	0	0	100	95.5965
DNAJB1	CD4_TEM	2.61111	1.64199	1.10014e+09	0.696074	0	0	72.1622	40.5843
EEF1B2	CD4_TEM	9.66426	3.11071	1.09672e+09	0.69391	0	0	99.0991	86.7238
AQP3	CD4_TEM	1.16366	0.792735	1.09471e+09	0.69264	0	0	54.0541	15.9348
RPL32	CD4_TEM	39.9378	11.2395	1.09311e+09	0.691629	0	0	99.97	95.977
RPS28	CD4_TEM	30.3201	8.77634	1.09237e+09	0.691158	0	0	99.97	95.18
PBXIP1	CD4_TEM	1.18919	0.743059	1.09068e+09	0.690088	0	0	63.3634	28.1203
RPS7	CD4_TEM	23.5865	6.52932	1.08818e+09	0.688507	0	0	100	95
RPL10A	CD4_TEM	12.5165	3.95215	1.08773e+09	0.688226	0	0	99.7297	89.2337
B2M	CD4_TEM	104.625	28.1644	1.08586e+09	0.687037	7.60368e-304	2.97418e-301	100	99.776
RPS5	CD4_TEM	14.5562	4.19037	1.08568e+09	0.686926	2.74073e-304	1.08369e-301	99.8498	90.2276
LCK	CD4_TEM	2.17267	0.919084	1.08564e+09	0.686898	0	0	84.6246	49.059
CD69	CD4_TEM	4.84324	2.57428	1.0851e+09	0.68656	0	0	79.5195	47.5854
RPL7A	CD4_TEM	23.9598	6.68361	1.08479e+09	0.686362	6.49836e-302	2.51479e-299	100	94.9157
SARAF	CD4_TEM	5.31321	1.84538	1083877469	0.685785	1.7813e-305	7.12069e-303	96.2763	81.2175
RPS23	CD4_TEM	29.8093	8.21345	1.07919e+09	0.682817	1.52611e-290	5.49655e-288	100	94.8487
RPL6	CD4_TEM	21.0423	5.88703	1.07842e+09	0.682329	3.81797e-289	1.36163e-286	100	94.5302
MT-CYB	CD4_TEM	22.2613	6.35786	1.07796e+09	0.682041	2.9645e-288	1.04699e-285	99.97	98.7504
DUSP2	CD4_TEM	3.1991	1.89453	1.07728e+09	0.681611	0	0	68.1081	36.1007
CXCR3	CD4_TEM	0.728829	0.587754	1.07637e+09	0.681037	0	0	44.6847	8.75623
FLT3LG	CD4_TEM	1.27808	0.72681	1075751778	0.680644	0	0	64.955	30.8736
RPS3A	CD4_TEM	29.23	7.84807	1.07568e+09	0.680598	1.37964e-283	4.73464e-281	100	95.2613
RPL41	CD4_TEM	62.5363	18.7887	1.07568e+09	0.680596	1.84157e-283	6.20287e-281	99.9399	97.1504
TXNIP	CD4_TEM	11.8859	4.36825	1.07513e+09	0.68025	1.63502e-283	5.55861e-281	98.979	90.6199
RPLP2	CD4_TEM	22.0778	6.06232	1.07464e+09	0.679941	1.206e-281	4.02482e-279	99.97	95.2423
RPL36A	CD4_TEM	10.873	3.41124	1.07376e+09	0.679384	8.58924e-281	2.78974e-278	99.3093	89.7906
RPL19	CD4_TEM	35.6889	9.24034	1.07154e+09	0.677977	2.02712e-275	6.35693e-273	100	96.2206
RPS6	CD4_TEM	19.0664	5.50413	1.07112e+09	0.677715	6.39092e-275	1.98703e-272	99.8799	92.5762
C12orf57	CD4_TEM	2.81982	1.13665	1070606967	0.677389	2.82523e-295	1.04871e-292	87.958	60.2625
RPL13A	CD4_TEM	12.8937	3.81679	1.06908e+09	0.676423	2.65359e-271	7.97765e-269	99.5495	92.3952
CD52	CD4_TEM	9.31201	2.82366	1.06665e+09	0.674883	1.86123e-268	5.41647e-266	98.1682	81.2828
INPP4B	CD4_TEM	1.09459	0.621028	1.0665e+09	0.674792	0	0	58.018	22.4178
RPL11	CD4_TEM	34.8952	8.9378	1.06649e+09	0.674787	1.02472e-265	2.91221e-263	100	96.1593
ITM2A	CD4_TEM	1.17508	0.672671	1.06449e+09	0.673521	0	0	60.9309	27.7886
CD6	CD4_TEM	1.08438	0.665344	1.06291e+09	0.672521	0	0	58.018	25.1312
CNN2	CD4_TEM	2.45826	0.929627	1.06285e+09	0.67248	1.05933e-280	3.41019e-278	85.3453	61.0366
TC2N	CD4_TEM	1.05075	0.616515	1.06266e+09	0.672359	0	0	59.6697	26.2931
RPL35A	CD4_TEM	21.4486	5.64886	1.06259e+09	0.672319	1.78409e-258	4.95418e-256	100	94.3313
RPL28	CD4_TEM	45.4102	11.2495	1.06168e+09	0.67174	1.44542e-256	3.92388e-254	100	97.0802
IL2RG	CD4_TEM	3.65315	1.25508	1061116859	0.671384	3.26134e-268	9.41571e-266	93.6036	65.4188
RPL17	CD4_TEM	13.2883	3.87663	1.06103e+09	0.671331	6.25171e-256	1.6722e-253	99.7297	92.1272
GIMAP7	CD4_TEM	3.10811	1.29729	1059849186	0.670582	6.81095e-271	2.03083e-268	86.2162	62.2133
NPM1	CD4_TEM	4.42823	1.40494	1.05912e+09	0.670121	1.0498e-257	2.89308e-255	95.9459	77.1526
GZMA	CD4_TEM	3.76336	0.934099	1.05891e+09	0.669985	0	0	81.1712	39.531
TPT1	CD4_TEM	28.4739	7.7905	1.05761e+09	0.669165	4.39322e-249	1.13342e-246	99.9399	96.1936
RPL18	CD4_TEM	23.2234	5.80179	1.05687e+09	0.6687	8.72613e-248	2.23543e-245	100	94.8947
RPL18A	CD4_TEM	27.7417	6.99162	1.05505e+09	0.667545	2.23956e-244	5.58004e-242	100	95.0938
RPS8	CD4_TEM	38.5009	9.13554	1.05496e+09	0.667491	3.7599e-244	9.17946e-242	100	96.5874
CD5	CD4_TEM	0.886787	0.578876	1053173261	0.666358	0	0	51.0811	18.2674
TOMM7	CD4_TEM	4.5048	1.48083	1.05252e+09	0.665947	2.96906e-244	7.29768e-242	96.3363	81.9056
TRADD	CD4_TEM	0.995495	0.590603	1.05094e+09	0.664945	0	0	58.3183	28.1965
RPL9	CD4_TEM	13.2832	3.54394	1.05059e+09	0.664724	9.90011e-237	2.30857e-234	99.7898	91.5653
RPS15	CD4_TEM	24.8492	6.03209	1.04963e+09	0.664113	1.40831e-234	3.182e-232	99.9399	95.4147
RPL39	CD4_TEM	30.0228	7.46134	1.04916e+09	0.663817	1.05963e-233	2.3794e-231	100	95.0816
RPL35	CD4_TEM	10.0883	2.78317	1.04544e+09	0.661467	6.84537e-228	1.48223e-225	99.4294	90.5179
PEBP1	CD4_TEM	1.33123	0.59329	1.0447e+09	0.660999	2.21055e-281	7.31028e-279	71.8018	43.1638
RPL36AL	CD4_TEM	4.24505	1.28573	1.041e+09	0.658653	1.38956e-223	2.92185e-221	96.6366	83.0063
SYNE2	CD4_TEM	1.61532	0.718117	1.03928e+09	0.657565	2.89939e-270	8.50573e-268	71.1111	42.049
CD8B	CD8_Naive	6.44401	5.96156	4.44898e+09	0.960701	0	0	98.6254	12.6239
RPS12	CD8_Naive	101.885	64.0579	4.19829e+09	0.906568	0	0	100	97.0875
LDHB	CD8_Naive	7.87326	5.65047	4.10562e+09	0.886557	0	0	99.3734	62.3547
RPL32	CD8_Naive	66.5502	38.572	4.10305e+09	0.886003	0	0	100	95.9204
RPS27A	CD8_Naive	58.1257	31.8818	4.08287e+09	0.881645	0	0	100	96.5152
RPL14	CD8_Naive	33.323	18.9446	4.08098e+09	0.881238	0	0	100	93.9864
RPL10	CD8_Naive	103.902	58.7829	4.0781e+09	0.880615	0	0	100	97.805
RPL30	CD8_Naive	64.5723	35.3629	4.07505e+09	0.879956	0	0	100	96.2297
RPL5	CD8_Naive	27.9061	16.5193	4.07383e+09	0.879694	0	0	99.9899	92.7154
CD8A	CD8_Naive	3.4905	2.83194	4.07029e+09	0.878928	0	0	90.944	16.7823
IL7R	CD8_Naive	8.37457	6.55005	4.06805e+09	0.878445	0	0	96.6748	29.0853
RPS5	CD8_Naive	26.362	16.3046	4.06114e+09	0.876952	0	0	99.9798	90.0899
RPSA	CD8_Naive	25.9921	16.2291	4.05967e+09	0.876636	0	0	99.9798	90.0636
RPS3	CD8_Naive	49.3884	27.7409	4.05707e+09	0.876074	0	0	100	95.3025
RPS4X	CD8_Naive	38.3921	22.0162	4.04558e+09	0.873594	0	0	100	93.9478
RPL34	CD8_Naive	53.3731	29.7883	4.03805e+09	0.871966	0	0	99.9899	95.535
RPS3A	CD8_Naive	48.4137	27.5473	4.02301e+09	0.868719	0	0	100	95.1948
RPS8	CD8_Naive	65.3686	36.6993	4.01555e+09	0.867108	0	0	100	96.5395
RPL13	CD8_Naive	67.1995	38.6057	4.00648e+09	0.86515	0	0	100	96.6833
RPS25	CD8_Naive	30.3271	17.6938	4.00599e+09	0.865044	0	0	100	92.6054
EEF1B2	CD8_Naive	16.6621	10.3001	4.00489e+09	0.864806	0	0	99.8787	86.5337
RPS14	CD8_Naive	54.2961	29.1405	4.00226e+09	0.864239	0	0	100	95.8341
RPS15A	CD8_Naive	57.6333	30.8476	4.00194e+09	0.864169	0	0	100	96.1351
NOSIP	CD8_Naive	4.40348	3.37072	3995133597	0.8627	0	0	93.9458	46.1744
RPL19	CD8_Naive	54.5988	28.6796	3990636916	0.861729	0	0	100	96.1676
RPLP0	CD8_Naive	30.9472	18.5938	3.98343e+09	0.860173	0	0	99.9899	92.6738
RPL12	CD8_Naive	38.7132	20.8613	3980896502	0.859626	0	0	100	95.2305
RPL18	CD8_Naive	36.3096	19.2459	3.98015e+09	0.859463	0	0	100	94.8231
EEF1A1	CD8_Naive	140.373	80.649	3.97825e+09	0.859054	0	0	100	98.4216
RPS28	CD8_Naive	45.1704	24.0636	3.96731e+09	0.856692	0	0	100	95.1121
RPS21	CD8_Naive	25.5031	14.194	3.95914e+09	0.854928	0	0	99.9697	92.6757
RPL11	CD8_Naive	52.6894	27.2335	3.95895e+09	0.854887	0	0	100	96.1054
RPS18	CD8_Naive	45.346	26.7858	3.95195e+09	0.853376	0	0	100	93.8555
RPL10A	CD8_Naive	19.9627	11.6112	3.93883e+09	0.850541	0	0	99.909	89.0828
RPS23	CD8_Naive	45.1275	23.9706	3.93679e+09	0.850102	0	0	100	94.7765
RPS6	CD8_Naive	31.6158	18.3961	3.93353e+09	0.849397	0	0	99.9596	92.4721
RPL35A	CD8_Naive	31.9205	16.4212	3.92676e+09	0.847935	0	0	99.9899	94.252
LTB	CD8_Naive	10.8239	7.53777	3.92041e+09	0.846564	0	0	98.0999	43.4521
RPL7A	CD8_Naive	34.0249	17.0552	3.90601e+09	0.843454	0	0	100	94.8444
RPL36	CD8_Naive	23.3595	12.8325	3.90518e+09	0.843276	0	0	99.9191	92.1881
RPL18A	CD8_Naive	43.1168	22.7898	3.90363e+09	0.842941	0	0	100	95.025
RPLP2	CD8_Naive	32.2263	16.5104	3.90331e+09	0.842872	0	0	100	95.1754
RPL28	CD8_Naive	66.8846	33.3356	3.9028e+09	0.842761	0	0	100	97.0393
RPL39	CD8_Naive	45.4809	23.3508	3.89551e+09	0.841187	0	0	99.9899	95.0128
RPL3	CD8_Naive	26.658	15.2737	3.89086e+09	0.840184	0	0	99.9495	90.9088
RPS13	CD8_Naive	43.1644	21.6283	3.88628e+09	0.839194	0	0	100	95.15
RPL22	CD8_Naive	18.6301	9.75052	3.88611e+09	0.839158	0	0	99.9697	91.7882
RPL9	CD8_Naive	20.9891	11.4624	3.8835e+09	0.838594	0	0	99.9697	91.4461
RPS27	CD8_Naive	50.177	26.7909	3.8704e+09	0.835766	0	0	99.9596	94.6934
RPS15	CD8_Naive	35.9961	17.4991	3864616356	0.834516	0	0	99.9899	95.3501
RPS7	CD8_Naive	32.5381	15.7617	3.86398e+09	0.83438	0	0	99.9899	94.9301
RPL29	CD8_Naive	35.6834	17.974	3.86181e+09	0.83391	0	0	100	94.5586
NPM1	CD8_Naive	7.37983	4.43864	3.85993e+09	0.833505	0	0	98.9792	76.8249
RPL6	CD8_Naive	29.711	14.8215	3.8593e+09	0.833369	0	0	99.9798	94.4539
GAS5	CD8_Naive	4.604	3.11613	3.85472e+09	0.832379	0	0	95.5326	57.0718
RPS4Y1	CD8_Naive	8.69638	5.27231	3.8424e+09	0.829719	0	0	96.7657	77.9128
CD3E	CD8_Naive	8.06752	5.06366	3.84136e+09	0.829495	0	0	99.5452	48.9858
RPL8	CD8_Naive	33.5129	16.7148	3.82805e+09	0.82662	0	0	100	94.8053
RPL37	CD8_Naive	34.0674	17.192	3.81707e+09	0.824248	0	0	99.9394	94.2296
RPL21	CD8_Naive	25.2443	12.8334	3.81366e+09	0.823512	0	0	99.8989	93.0611
SARAF	CD8_Naive	8.23883	4.85872	3812015515	0.823158	0	0	98.5749	80.9577
RPL41	CD8_Naive	87.6995	44.7473	3.80401e+09	0.821429	0	0	100	97.11
RPLP1	CD8_Naive	86.2976	43.1724	3.80307e+09	0.821226	0	0	100	98.0466
EEF1G	CD8_Naive	10.3578	5.74845	3.7972e+09	0.819959	0	0	99.6463	85.311
RPS19	CD8_Naive	41.8005	21.3315	3.79052e+09	0.818517	0	0	99.9899	94.9861
RPL36A	CD8_Naive	16.093	8.78944	3.78891e+09	0.818168	0	0	99.7372	89.6481
RPL13A	CD8_Naive	19.008	10.1138	3.77621e+09	0.815426	0	0	99.9191	92.2871
TPT1	CD8_Naive	41.3681	21.0665	3.76911e+09	0.813893	0	0	99.9899	96.14
RPS16	CD8_Naive	19.1243	9.6879	3.76887e+09	0.81384	0	0	99.9495	91.654
RPL24	CD8_Naive	16.4433	7.87919	3.76814e+09	0.813683	0	0	99.9394	92.0217
RPL17	CD8_Naive	18.9592	9.72175	3.76388e+09	0.812764	0	0	99.909	92.0168
RACK1	CD8_Naive	20.6763	10.1406	3.76131e+09	0.812208	0	0	99.9697	92.636
SNHG29	CD8_Naive	5.81029	3.36893	3759522067	0.811822	0	0	98.4334	74.118
RPL23A	CD8_Naive	19.1646	9.8528	3.75951e+09	0.81182	0	0	99.8686	90.787
LEF1	CD8_Naive	2.04356	1.60632	3.72748e+09	0.804904	0	0	78.3808	19.4151
CD3D	CD8_Naive	3.73752	2.31815	3.71599e+09	0.802422	0	0	95.0475	37.487
PCED1B-AS1	CD8_Naive	4.6506	2.94659	3.7079e+09	0.800675	0	0	95.0778	54.5311
RPL4	CD8_Naive	10.279	5.59836	3.70695e+09	0.80047	0	0	99.3228	85.0745
C12orf57	CD8_Naive	4.1607	2.52181	3.6863e+09	0.796011	0	0	95.3608	59.7176
EEF1D	CD8_Naive	11.1894	5.12242	3.68316e+09	0.795332	0	0	99.8383	91.3632
TCF7	CD8_Naive	2.04437	1.57671	3.67728e+09	0.794063	0	0	76.7738	19.6454
FAU	CD8_Naive	28.2185	11.5373	3.67461e+09	0.793486	0	0	100	95.1517
RPS29	CD8_Naive	11.2397	6.0281	3.67138e+09	0.79279	0	0	99.0904	84.3227
HINT1	CD8_Naive	5.70366	3.00277	3.64809e+09	0.78776	0	0	98.5749	78.1467
NACA	CD8_Naive	18.5473	7.9641	3.64424e+09	0.786929	0	0	99.9596	92.7885
NELL2	CD8_Naive	1.47332	1.36247	3.64341e+09	0.78675	0	0	62.8664	6.83313
RPL38	CD8_Naive	9.71185	5.07291	3.64152e+09	0.786342	0	0	98.9084	84.9019
RPL7	CD8_Naive	10.49	4.91779	3.61497e+09	0.780608	0	0	99.7372	89.0048
RPL26	CD8_Naive	30.9929	13.468	3.6135e+09	0.780291	0	0	99.9596	94.2845
RPL35	CD8_Naive	13.5631	6.37043	3.61045e+09	0.779633	0	0	99.7271	90.3867
LINC02446	CD8_Naive	3.09268	2.87298	3.60063e+09	0.777511	0	0	61.5019	8.09985
RPL31	CD8_Naive	9.21781	4.37132	3597212308	0.776774	0	0	99.5452	87.671
FLT3LG	CD8_Naive	1.83252	1.30317	3.59571e+09	0.77645	0	0	79.3309	30.0918
CCR7	CD8_Naive	2.11532	1.68729	3.57392e+09	0.771744	0	0	69.9919	17.7514
PRKCQ-AS1	CD8_Naive	1.63392	1.26763	3.57242e+09	0.77142	0	0	71.3362	19.7931
RPS20	CD8_Naive	6.66394	3.50778	3.57109e+09	0.771133	0	0	97.5136	78.599
IL32	CD8_Naive	16.2002	8.30663	3.54906e+09	0.766376	0	0	99.808	60.6333
HSP90AB1	CD8_Naive	4.97716	2.63987	3547556268	0.766051	0	0	96.604	73.7607
MAL	CD8_Naive	1.48393	1.14255	3.54464e+09	0.765421	0	0	68.587	15.4316
HNRNPA1	CD8_Naive	7.40712	3.68141	3.53839e+09	0.764073	0	0	97.9179	81.9407
STMN1	CD8_Proliferating	16.4279	16.1649	2.81535e+08	0.989562	0	0	98.9933	13.8079
HMGN2	CD8_Proliferating	29.1275	27.153	2.78897e+08	0.98029	0	0	99.8322	72.351
PFN1	CD8_Proliferating	105.302	90.1527	2.77823e+08	0.976518	0	0	100	96.1452
ACTB	CD8_Proliferating	343.898	287.65	2.75799e+08	0.969403	0	0	100	99.2884
HMGB1	CD8_Proliferating	22.6762	19.7316	2.75766e+08	0.969287	0	0	100	85.6241
HMGB2	CD8_Proliferating	15.2735	14.5764	2.75186e+08	0.967247	0	0	98.6577	40.7
CFL1	CD8_Proliferating	50.8473	42.4252	2.75172e+08	0.967197	0	0	99.8322	93.5796
ACTG1	CD8_Proliferating	74.7584	64.4255	2.74284e+08	0.964077	0	0	100	92.9451
GAPDH	CD8_Proliferating	79.7953	68.3024	2.74006e+08	0.963099	0	0	100	93.4458
HNRNPA2B1	CD8_Proliferating	24.8742	21.3402	2.73964e+08	0.962953	0	0	99.6644	87.586
RAN	CD8_Proliferating	12.0252	10.6685	2.73917e+08	0.962787	0	0	99.4966	64.8078
CD99	CD8_Proliferating	15.7282	12.9344	2.73426e+08	0.96106	0	0	99.6644	78.1938
PPIA	CD8_Proliferating	36.9899	31.0255	2.73296e+08	0.960605	0	0	100	90.5507
CALM1	CD8_Proliferating	26.5067	21.2303	2.73235e+08	0.960389	0	0	100	89.5307
ARHGDIB	CD8_Proliferating	30.4866	24.6787	2.72939e+08	0.959351	0	0	99.6644	91.7925
PSMB9	CD8_Proliferating	13.9799	11.6023	2.72524e+08	0.957892	0	0	99.4966	77.1609
CORO1A	CD8_Proliferating	29.9866	25.0067	2.72053e+08	0.956237	0	0	99.4966	88.5402
IL32	CD8_Proliferating	58.3993	50.3966	2.71923e+08	0.955778	0	0	99.1611	61.3972
ARPC2	CD8_Proliferating	21.7617	17.583	2.71812e+08	0.955387	0	0	99.6644	88.4384
H2AFV	CD8_Proliferating	7.30872	6.67303	2.71561e+08	0.954505	0	0	97.651	41.5011
PPP1CA	CD8_Proliferating	11.1393	9.35884	2.71019e+08	0.952601	0	0	99.1611	70.6376
CHCHD2	CD8_Proliferating	14.5755	12.0532	2.70688e+08	0.951437	0	0	99.4966	80.8855
PSMB8	CD8_Proliferating	9.94966	8.47409	2.70534e+08	0.950895	0	0	99.3289	65.6573
COX6C	CD8_Proliferating	10.4195	8.53389	2.70494e+08	0.950756	0	0	98.8255	73.6664
PSME2	CD8_Proliferating	15.6728	13.2966	2.70024e+08	0.949103	0	0	99.4966	73.1134
PSME1	CD8_Proliferating	16.7232	13.2719	2.69716e+08	0.948022	0	0	99.4966	84.4079
SUB1	CD8_Proliferating	12.7383	10.8362	269495502	0.947246	0	0	98.9933	72.8314
COX8A	CD8_Proliferating	11.6326	9.60821	2.69435e+08	0.947032	0	0	99.3289	72.6261
COX6A1	CD8_Proliferating	11.5201	9.28386	2.69354e+08	0.946749	0	0	99.6644	78.7226
IDH2	CD8_Proliferating	6.82383	6.26198	2.69262e+08	0.946425	0	0	95.9732	36.5782
CD3D	CD8_Proliferating	10.2752	8.81881	2.69154e+08	0.946044	0	0	98.6577	38.6037
H2AFZ	CD8_Proliferating	13.0906	11.9211	2.69022e+08	0.945584	0	0	98.3221	57.8361
PPIB	CD8_Proliferating	13.7701	11.2677	2.68933e+08	0.945268	0	0	98.9933	77.2721
RAC2	CD8_Proliferating	19.6829	15.7443	2.6888e+08	0.945083	0	0	99.1611	83.4101
GZMA	CD8_Proliferating	26.406	23.5997	2.68646e+08	0.944261	0	0	97.651	39.749
CALM3	CD8_Proliferating	8.17282	6.95273	2.68278e+08	0.942966	0	0	98.8255	59.3423
CNN2	CD8_Proliferating	13.2181	11.6976	2.67714e+08	0.940983	0	0	98.1544	61.1598
ANP32B	CD8_Proliferating	8.47315	7.09055	2.6696e+08	0.938333	0	0	98.6577	63.8532
SLC25A5	CD8_Proliferating	12.6812	10.8641	2.669e+08	0.938123	0	0	99.6644	66.4385
C12orf75	CD8_Proliferating	5.95302	5.24863	2.66297e+08	0.936005	0	0	96.6443	34.7717
HNRNPA1	CD8_Proliferating	19.0973	15.3145	2.66251e+08	0.935844	2.7214e-301	3.40194e-299	98.9933	82.2506
ATP5MC3	CD8_Proliferating	8.55369	7.16999	2.66155e+08	0.935506	0	0	98.3221	64.1391
CLIC1	CD8_Proliferating	16.3742	12.4291	2.65911e+08	0.934647	1.60578e-299	1.92149e-297	99.8322	83.0198
SEM1	CD8_Proliferating	5.33725	4.47767	2.65139e+08	0.931935	0	0	97.8188	51.3541
MYL6	CD8_Proliferating	27.354	20.3085	2.65046e+08	0.931608	8.59492e-293	9.41739e-291	100	93.3942
PTMA	CD8_Proliferating	52.604	39.5516	2.65036e+08	0.931572	1.0238e-291	1.10842e-289	100	96.5841
FABP5	CD8_Proliferating	5.49329	5.34393	2.64136e+08	0.92841	0	0	88.9262	10.5667
ATP5F1B	CD8_Proliferating	8.93289	7.46318	2.64095e+08	0.928263	0	0	98.6577	64.494
PSMA2	CD8_Proliferating	5.6745	4.89373	2.6406e+08	0.928141	0	0	95.9732	48.8317
DEK	CD8_Proliferating	6.59732	5.72357	2.63995e+08	0.927912	0	0	97.4832	50.1469
B2M	CD8_Proliferating	207.888	131.394	2.63906e+08	0.927601	5.32202e-286	5.4078e-284	100	99.7773
LCK	CD8_Proliferating	6.9094	5.65646	2.63883e+08	0.92752	0	0	97.8188	49.2463
CAPZB	CD8_Proliferating	9.03691	6.93063	2.63722e+08	0.926953	2.64223e-296	3.03207e-294	98.4899	77.9454
CD3G	CD8_Proliferating	6.09899	5.20327	2.63535e+08	0.926297	0	0	97.1477	34.4303
RPLP0	CD8_Proliferating	54.8054	42.1195	2.63465e+08	0.926051	1.99616e-284	2.00039e-282	99.8322	92.8165
PARK7	CD8_Proliferating	7.08557	5.84068	2.63375e+08	0.925734	0	0	97.3154	63.1034
SLC9A3R1	CD8_Proliferating	7.57718	6.25084	2.63197e+08	0.925108	0	0	97.8188	56.1813
SNRPB	CD8_Proliferating	6.23322	5.37306	2.63067e+08	0.92465	0	0	96.1409	51.4693
DBI	CD8_Proliferating	7.28356	5.96438	2.63046e+08	0.924575	6.49273e-307	8.61993e-305	97.651	62.0116
TUBA1B	CD8_Proliferating	20.9933	19.4901	2.62912e+08	0.924107	0	0	97.4832	59.0069
SRP14	CD8_Proliferating	10.8993	8.16002	2.62642e+08	0.923159	1.00886e-286	1.0367e-284	99.6644	83.7038
LIME1	CD8_Proliferating	7.8406	6.65424	2.6261e+08	0.923046	0	0	96.8121	45.2735
CDK2AP2	CD8_Proliferating	5.97651	5.2544	2.62111e+08	0.92129	0	0	94.6309	41.915
PSMB3	CD8_Proliferating	6.42617	5.25388	2.62089e+08	0.921212	3.87694e-307	5.16599e-305	97.1477	59.5979
NPM1	CD8_Proliferating	15.3205	12.3027	2.62085e+08	0.921199	3.81906e-284	3.81665e-282	99.1611	77.2562
PSMA5	CD8_Proliferating	4.69631	4.02761	2.61846e+08	0.92036	0	0	95.1342	43.6144
CD3E	CD8_Proliferating	13.6661	10.5706	2.6174e+08	0.919988	0	0	98.9933	49.9713
HSP90AA1	CD8_Proliferating	14.0067	11.4282	2.61611e+08	0.919532	2.5187e-283	2.50335e-281	99.1611	77.9104
HNRNPA3	CD8_Proliferating	7.72148	6.43859	2.61565e+08	0.91937	1.57801e-299	1.8945e-297	97.4832	62.7437
COX5A	CD8_Proliferating	7.00168	5.77435	2.61436e+08	0.918917	7.01217e-303	8.82635e-301	96.9799	59.8853
TMSB4X	CD8_Proliferating	141.738	103.465	2.61235e+08	0.91821	1.04047e-273	9.01171e-272	100	98.7676
NUCKS1	CD8_Proliferating	5.3406	4.63369	2.61228e+08	0.918188	0	0	94.6309	44.8619
COX7A2	CD8_Proliferating	7.00839	5.5096	2.61121e+08	0.917811	2.29737e-291	2.47986e-289	97.651	68.1376
ATP5MG	CD8_Proliferating	13.2735	9.71744	2.61024e+08	0.917471	6.61814e-277	5.98876e-275	99.4966	85.3868
PSMA7	CD8_Proliferating	8.02181	6.37113	2.6085e+08	0.916857	1.43836e-287	1.48645e-285	97.8188	70.5339
SUMO2	CD8_Proliferating	8.46812	6.33098	2.60775e+08	0.916595	2.76824e-281	2.6782e-279	98.8255	78.1299
PSMB2	CD8_Proliferating	4.42617	3.86865	2.6071e+08	0.916366	0	0	93.1208	38.9056
LDHB	CD8_Proliferating	11.5856	9.25736	2.60682e+08	0.916267	3.35629e-289	3.56994e-287	99.6644	63.0754
NDUFB9	CD8_Proliferating	5.83221	4.71384	2.60423e+08	0.915356	5.96175e-299	7.04126e-297	97.8188	60.0468
MYL12B	CD8_Proliferating	9.48826	6.73866	2.604e+08	0.915276	4.9689e-276	4.4194e-274	99.3289	81.5896
YWHAB	CD8_Proliferating	11.3138	8.22922	2.60288e+08	0.914881	1.18324e-274	1.02727e-272	98.9933	84.2267
RPSA	CD8_Proliferating	39.3926	29.3302	2.59992e+08	0.913841	9.18465e-269	7.525e-267	99.8322	90.257
TUBB	CD8_Proliferating	10.7282	9.68989	2.59951e+08	0.913699	1.85131e-307	2.48506e-305	95.6376	52.7166
SNRPD2	CD8_Proliferating	8.81208	6.70171	2.59661e+08	0.912679	3.0625e-276	2.73721e-274	98.3221	75.9071
ENO1	CD8_Proliferating	9.19128	7.47735	2.59619e+08	0.91253	4.17819e-282	4.09677e-280	98.4899	68.9029
IL2RG	CD8_Proliferating	10.3674	7.97057	2.59577e+08	0.912384	1.91241e-279	1.78379e-277	98.6577	65.5739
COTL1	CD8_Proliferating	26.5621	21.8682	2.59331e+08	0.911519	1.4368e-279	1.34361e-277	98.8255	63.8218
PSMD8	CD8_Proliferating	4.37416	3.65443	2.59315e+08	0.911464	0	0	94.7987	46.5403
SNRPG	CD8_Proliferating	5.05537	4.31378	2.59307e+08	0.911436	0	0	94.4631	46.8053
ATP5MF	CD8_Proliferating	6.76174	5.36705	2.5923e+08	0.911164	4.51334e-286	4.59893e-284	97.8188	63.9977
CCL5	CD8_Proliferating	54.9581	45.1334	2.59126e+08	0.9108	1.14621e-285	1.16143e-283	97.9866	57.9381
PLAAT4	CD8_Proliferating	9.40604	7.54402	2.59126e+08	0.910799	6.01174e-280	5.66552e-278	97.3154	65.0762
LDHA	CD8_Proliferating	8.73993	7.49171	2.58896e+08	0.909989	3.31683e-290	3.54871e-288	96.9799	58.8416
JPT1	CD8_Proliferating	5.14262	4.45195	2.58817e+08	0.909711	0	0	95.1342	42.0181
RTRAF	CD8_Proliferating	4.54866	3.76362	2.5878e+08	0.909583	0	0	95.6376	48.9268
TMA7	CD8_Proliferating	11.6124	8.27168	2.58591e+08	0.908919	5.2228e-266	4.13021e-264	99.3289	86.3917
LCP1	CD8_Proliferating	12	9.30179	2.58544e+08	0.908754	6.96411e-269	5.71858e-267	98.4899	77.6387
ATP5F1A	CD8_Proliferating	5.94128	4.82605	2.58412e+08	0.90829	3.73725e-292	4.08258e-290	96.4765	56.6732
PSMA4	CD8_Proliferating	4.40268	3.84459	2.58381e+08	0.908179	0	0	93.1208	35.8387
ATP5F1C	CD8_Proliferating	5.18792	4.26334	2.58315e+08	0.907948	2.06518e-300	2.53801e-298	95.8054	52.9948
GZMK	CD8_TCM	9.56511	9.15202	3.46729e+09	0.945252	0	0	92.9249	7.99681
CD8B	CD8_TCM	4.96552	4.43201	3.2636e+09	0.889722	0	0	88.0672	13.1818
CD8A	CD8_TCM	4.8171	4.16795	3.23799e+09	0.882741	0	0	88.8106	17.1477
CCL5	CD8_TCM	35.8286	26.3783	3.14829e+09	0.858287	0	0	99.8206	57.2938
CD3E	CD8_TCM	8.1365	5.11126	3.0064e+09	0.819603	0	0	99.5001	49.2115
DUSP2	CD8_TCM	5.98142	4.74104	3.00363e+09	0.818849	0	0	86.0677	35.4982
CD3D	CD8_TCM	4.42592	3.00766	2.99462e+09	0.816392	0	0	94.9372	37.745
IL32	CD8_TCM	20.1912	12.3269	2.98928e+09	0.814937	0	0	99.5258	60.8123
LYAR	CD8_TCM	2.48987	2.0043	2.97617e+09	0.811362	0	0	80.7229	28.3609
GZMA	CD8_TCM	7.65945	4.90372	2.8494e+09	0.776804	0	0	90.4383	38.9812
CD3G	CD8_TCM	2.52102	1.64568	2821980154	0.769328	0	0	84.709	33.6754
LIME1	CD8_TCM	3.26455	2.10424	2.81301e+09	0.766881	0	0	88.1441	44.6275
GZMM	CD8_TCM	2.6838	1.66437	2.80875e+09	0.765721	0	0	87.1315	40.8212
KLRK1	CD8_TCM	2.59959	1.71461	2.799e+09	0.763063	0	0	81.979	32.3071
CST7	CD8_TCM	7.35606	3.8658	2792616819	0.761323	0	0	95.2448	42.9565
CD2	CD8_TCM	2.59972	1.70555	2.79044e+09	0.760729	0	0	83.4786	39.4415
LCK	CD8_TCM	3.04025	1.8098	2.77962e+09	0.757779	0	0	90.0282	48.6311
KLRG1	CD8_TCM	1.59882	1.24557	2.67972e+09	0.730545	0	0	62.3943	18.9571
CMC1	CD8_TCM	2.25237	1.63224	2.67076e+09	0.728103	0	0	68.1364	28.8368
NKG7	CD8_TCM	20.1537	7.62527	2.65858e+09	0.724781	0	0	97.1418	53.6361
PCED1B-AS1	CD8_TCM	3.40784	1.6701	2.64102e+09	0.719993	0	0	90.5409	54.7868
CD27	CD8_TCM	1.67265	1.28896	2.62717e+09	0.716219	0	0	59.4591	18.1278
RPS15A	CD8_TCM	41.4046	14.2124	2.62654e+09	0.716047	0	0	99.9872	96.1525
THEMIS	CD8_TCM	1.28531	0.935955	2.60697e+09	0.710712	0	0	59.8821	19.3664
PLAAT4	CD8_TCM	3.85927	2.02083	2602070600	0.709376	0	0	91.0536	64.686
CNN2	CD8_TCM	3.54217	2.04037	2.59669e+09	0.707909	0	0	86.8752	60.78
STK17A	CD8_TCM	1.72584	1.08711	2.58889e+09	0.705782	0	0	71.9303	37.8175
HCST	CD8_TCM	5.57434	2.27637	2587265069	0.70534	0	0	97.3725	76.787
B2M	CD8_TCM	109.616	33.5061	2584794825	0.704667	0	0	100	99.7739
IL2RG	CD8_TCM	4.24942	1.87318	2.57961e+09	0.703253	0	0	95.1423	65.1252
DNAJB1	CD8_TCM	2.44578	1.48954	2.56725e+09	0.699883	0	0	73.2504	40.2659
ITM2A	CD8_TCM	1.56332	1.07375	2.56679e+09	0.699758	0	0	63.7657	27.4264
CXCR3	CD8_TCM	0.838887	0.70523	2.56229e+09	0.698533	0	0	47.6544	8.3652
ZFP36L2	CD8_TCM	6.83274	3.0971	2.56136e+09	0.698278	0	0	95.4114	80.8331
SAMD3	CD8_TCM	1.29236	0.819359	2.55258e+09	0.695885	0	0	64.3681	27.0937
RPS27	CD8_TCM	34.7392	10.9777	2.54867e+09	0.694819	0	0	99.859	94.7185
FYN	CD8_TCM	2.14971	1.1393	2541448115	0.692849	0	0	80.5306	52.57
CXCR4	CD8_TCM	4.05088	2.34077	2.53653e+09	0.691508	0	0	77.5442	46.6107
HLA-A	CD8_TCM	26.3088	8.57201	2.5352e+09	0.691146	0	0	99.9487	97.23
LAT	CD8_TCM	1.69303	0.925341	2.53132e+09	0.690088	0	0	74.1348	40.4269
SH2D1A	CD8_TCM	0.913484	0.738025	2.52713e+09	0.688945	0	0	49.5129	13.3334
TC2N	CD8_TCM	1.16073	0.734181	2520717528	0.687198	0	0	61.4586	25.946
CD69	CD8_TCM	4.29172	2.03809	2513109378	0.685124	0	0	80.2743	47.2692
RPSA	CD8_TCM	14.7126	4.69023	2.51292e+09	0.685073	0	0	99.6539	90.1132
ISG20	CD8_TCM	2.0173	1.01615	2.51213e+09	0.684856	0	0	77.98	47.585
RPS29	CD8_TCM	8.16098	2.87143	2.51051e+09	0.684416	0	0	98.2953	84.4016
SEPTIN1	CD8_TCM	1.83953	0.931982	2.50755e+09	0.683608	0	0	77.7621	47.6663
CD99	CD8_TCM	4.48423	1.70213	2.5064e+09	0.683295	0	0	96.8085	77.9122
TRBC2	CD8_TCM	2.57819	1.35238	2500117095	0.681582	0	0	78.121	47.1601
CTSW	CD8_TCM	3.64201	0.98626	2.49915e+09	0.681318	0	0	85.5678	43.5784
RPS3	CD8_TCM	30.3498	8.2629	2.49792e+09	0.680984	0	0	99.9615	95.324
GIMAP5	CD8_TCM	1.59715	0.859177	2.49451e+09	0.680053	0	0	70.546	38.9029
SIT1	CD8_TCM	0.883876	0.650059	2.48063e+09	0.67627	0	0	49.9744	15.7358
TIGIT	CD8_TCM	1.04832	0.786434	2.47892e+09	0.675803	0	0	49.5129	15.4042
GYPC	CD8_TCM	1.94835	0.972375	2473031187	0.674198	0	0	76.6983	49.1573
PPP2R5C	CD8_TCM	1.75506	0.880168	2.46553e+09	0.672152	0	0	74.7757	47.9928
PRKCH	CD8_TCM	1.98898	0.937781	2457454315	0.669951	0	0	76.3779	46.5005
CALM1	CD8_TCM	7.60715	2.34249	2.45728e+09	0.669903	0	0	99.2822	89.3821
C12orf75	CD8_TCM	1.50487	0.807106	2.45699e+09	0.669824	0	0	66.5086	34.3235
RPS12	CD8_TCM	50.1169	11.1455	2.44764e+09	0.667274	0	0	99.9872	97.1007
CLEC2D	CD8_TCM	1.31684	0.716072	2443538333	0.666157	0	0	65.6627	35.8122
TRAC	CD8_TCM	0.961164	0.627685	2.44066e+09	0.665374	0	0	52.9223	21.0363
CBLB	CD8_TCM	1.16034	0.687716	2439030886	0.664928	0	0	59.6386	29.6095
RPL23A	CD8_TCM	13.1541	3.69863	2.43767e+09	0.664557	0	0	99.5129	90.8334
PDCD4	CD8_TCM	1.41759	0.761252	2.4362e+09	0.664158	0	0	68.1107	41.5321
GBP5	CD8_TCM	1.56421	0.95892	2.43614e+09	0.664141	0	0	62.2533	33.1675
HINT1	CD8_TCM	4.16291	1.42309	2432700224	0.663203	0	0	94.6296	78.3031
HLA-B	CD8_TCM	31.6844	8.20016	2.41948e+09	0.659598	0	0	99.9615	98.2042
HLA-C	CD8_TCM	26.6589	6.58594	2.41947e+09	0.659596	0	0	99.8846	97.6761
LDHB	CD8_TCM	3.35376	1.03083	2418469121	0.659323	0	0	88.6055	62.6981
C12orf57	CD8_TCM	2.62945	0.953933	2.4179e+09	0.659168	0	0	86.4266	60.0245
CD96	CD8_TCM	1.1938	0.644778	2.41584e+09	0.658607	0	0	62.1123	32.4282
SKAP1	CD8_TCM	2.05678	0.820875	2.41003e+09	0.657022	0	0	79.8385	50.6166
OPTN	CD8_TCM	1.08459	0.611349	2.4096e+09	0.656905	0	0	59.5488	30.4239
GIMAP4	CD8_TCM	2.56819	1.15598	2.40565e+09	0.655827	0	0	80.8639	59.2113
ACAP1	CD8_TCM	1.45988	0.684606	2403634956	0.655279	0	0	71.6996	45.7256
RAC2	CD8_TCM	6.03832	2.11467	2.40114e+09	0.654598	0	0	97.1418	83.2022
SLC9A3R1	CD8_TCM	2.23545	0.916271	2400542843	0.654436	0	0	80.8382	55.8249
BTG1	CD8_TCM	6.65137	2.1378	2.40025e+09	0.654356	0	0	96.911	86.6928
SARAF	CD8_TCM	4.96514	1.50908	2399230774	0.654078	0	0	95.1679	81.0926
MYL12A	CD8_TCM	7.44117	2.06195	2.39879e+09	0.653959	0	0	99.1925	89.2845
ARL4C	CD8_TCM	1.44143	0.667864	2.39755e+09	0.653621	0	0	68.7644	40.5483
RPS25	CD8_TCM	16.7142	3.77623	2.39752e+09	0.653611	0	0	99.7052	92.6432
ZBTB38	CD8_TCM	0.876826	0.535199	2.39362e+09	0.652548	0	0	53.1659	24.6581
IL7R	CD8_TCM	3.83133	1.90226	2.39133e+09	0.651925	0	0	59.536	30.0023
LITAF	CD8_TCM	2.95091	1.03894	2.39003e+09	0.651569	0	0	89.0413	66.7583
RHOH	CD8_TCM	1.17867	0.581763	2.38792e+09	0.650994	0	0	62.7531	34.0534
CCL4	CD8_TCM	3.22058	0.653887	2.38512e+09	0.650231	0	0	63.0608	31.963
BIN1	CD8_TCM	1.19905	0.611333	2.3847e+09	0.650117	0	0	63.8811	36.7702
ZAP70	CD8_TCM	1.51038	0.665086	2.38417e+09	0.649973	0	0	70.828	41.6137
LAG3	CD8_TCM	0.719303	0.543725	2.38346e+09	0.64978	0	0	41.1817	11.4438
CLDND1	CD8_TCM	0.983722	0.673143	2.38294e+09	0.649638	0	0	49.577	22.4688
LBH	CD8_TCM	1.30608	0.632575	2.37926e+09	0.648635	0	0	65.1243	37.7533
RPS7	CD8_TCM	21.9991	4.9777	2.37725e+09	0.648085	0	0	99.9487	94.9533
UBC	CD8_TCM	8.76698	2.35805	2.37534e+09	0.647564	0	0	98.8721	91.8379
DENND2D	CD8_TCM	1.26416	0.758837	2.37514e+09	0.647511	0	0	57.5493	31.3657
SYNE2	CD8_TCM	1.56857	0.677429	2.37309e+09	0.646952	0	0	69.6616	41.7967
RPL3	CD8_TCM	15.3126	3.67211	2.3721e+09	0.646681	0	0	99.4489	90.9574
PTPRC	CD8_TCM	7.05204	2.1507	2371381091	0.646486	0	0	98.0902	90.9588
CD8A	CD8_TEM	4.90555	4.48239	12472379895	0.890796	0	0	86.0738	13.5611
GZMH	CD8_TEM	9.36815	7.28528	1.2336e+10	0.881057	0	0	96.8167	31.6484
CD8B	CD8_TEM	3.55064	3.1515	12017439947	0.858303	0	0	80.3834	9.77248
CCL5	CD8_TEM	27.878	19.2604	1.19285e+10	0.851953	0	0	99.2983	55.0881
CD3D	CD8_TEM	4.37868	3.1157	1.1686e+10	0.834631	0	0	93.6685	34.8183
NKG7	CD8_TEM	33.3652	22.1663	1.16204e+10	0.829948	0	0	99.0814	51.2059
CD3G	CD8_TEM	2.81283	2.04475	1.14304e+10	0.816376	0	0	87.8632	30.763
GZMA	CD8_TEM	6.92686	4.37828	1.1371e+10	0.812137	0	0	95.8279	35.8895
CST7	CD8_TEM	8.27017	5.04791	1.12995e+10	0.807027	0	0	97.3015	40.055
IL32	CD8_TEM	16.8439	9.39455	1.11079e+10	0.793342	0	0	98.319	58.8557
CD3E	CD8_TEM	6.71497	3.85945	1.09995e+10	0.7856	0	0	97.2792	46.7157
FGFBP2	CD8_TEM	4.8401	3.01405	1.09931e+10	0.785147	0	0	86.8074	28.184
CTSW	CD8_TEM	5.4145	2.93518	1.08642e+10	0.775936	0	0	93.5728	40.8024
KLRK1	CD8_TEM	2.40793	1.59991	1.08618e+10	0.775765	0	0	82.8395	29.6276
GZMB	CD8_TEM	5.58448	2.93735	1.07728e+10	0.769411	0	0	88.852	32.1455
KLRG1	CD8_TEM	1.52697	1.23435	1.07709e+10	0.769276	0	0	67.8352	16.2848
GZMM	CD8_TEM	2.49967	1.55507	1.07203e+10	0.765657	0	0	85.9016	38.4657
PRF1	CD8_TEM	5.05974	2.29902	1.06559e+10	0.761059	0	0	91.962	36.2975
C12orf75	CD8_TEM	1.84441	1.21304	1.06055e+10	0.757461	0	0	78.9417	31.7536
KLRD1	CD8_TEM	2.6846	1.58522	1.05313e+10	0.752159	0	0	81.2414	28.995
CD2	CD8_TEM	2.22994	1.39975	1.04644e+10	0.747384	0	0	81.0022	37.2932
CCL4	CD8_TEM	5.07263	2.67042	1.03215e+10	0.737177	0	0	76.8269	29.3569
FCRL6	CD8_TEM	1.32777	0.933432	1.03035e+10	0.735895	0	0	67.0792	20.1043
B2M	CD8_TEM	112.192	38.0295	1.02668e+10	0.733272	0	0	99.9649	99.7644
CD99	CD8_TEM	4.75758	2.08442	1.02311e+10	0.730722	0	0	96.3733	76.9463
LITAF	CD8_TEM	3.41826	1.59388	1.01354e+10	0.723883	0	0	93.0337	65.303
HLA-C	CD8_TEM	29.8169	10.3129	1.01309e+10	0.723566	0	0	99.6491	97.5761
CD52	CD8_TEM	10.8536	4.65062	1.00272e+10	0.71616	0	0	96.4339	80.3451
IL2RG	CD8_TEM	4.1207	1.83419	1.00261e+10	0.716077	0	0	94.6509	63.5769
SLC9A3R1	CD8_TEM	2.53137	1.28128	9.98989e+09	0.713493	0	0	85.6081	54.1712
GNLY	CD8_TEM	19.1376	8.0917	9.92348e+09	0.70875	0	0	80.5301	42.6873
LCK	CD8_TEM	2.30914	1.1228	9.90283e+09	0.707275	0	0	84.6448	46.8261
LYAR	CD8_TEM	1.31651	0.854255	9.90226e+09	0.707234	0	0	65.2643	26.6851
HCST	CD8_TEM	5.53973	2.35936	9.87638e+09	0.705386	0	0	94.6158	75.895
SAMD3	CD8_TEM	1.22669	0.792283	9.83293e+09	0.702283	0	0	64.0554	25.1502
THEMIS	CD8_TEM	1.23601	0.93254	9830688375	0.702122	0	0	56.1577	17.4915
ADGRG1	CD8_TEM	1.27505	0.806804	9.82268e+09	0.70155	0	0	61.813	20.6166
LIME1	CD8_TEM	2.15786	1.03082	9.7657e+09	0.697481	0	0	80.1856	42.8915
APOBEC3G	CD8_TEM	1.40602	0.844235	9722634998	0.694405	0	0	67.3057	31.8902
IFITM1	CD8_TEM	10.8132	3.83405	9.63396e+09	0.688072	0	0	97.2888	69.6019
PLAAT4	CD8_TEM	3.10931	1.32478	9.6082e+09	0.686232	0	0	89.0721	63.4347
CALM1	CD8_TEM	7.68814	2.55269	9.59871e+09	0.685554	0	0	97.8852	88.9582
HLA-A	CD8_TEM	24.4312	7.01462	9511752352	0.679344	0	0	99.5758	97.1129
SYNE1	CD8_TEM	1.40525	0.768183	9.45273e+09	0.675128	0	0	67.1462	35.1941
HOPX	CD8_TEM	1.60464	0.716498	9.45011e+09	0.674941	0	0	65.4046	27.6229
SKAP1	CD8_TEM	2.1141	0.925497	9.43006e+09	0.673509	0	0	81.1713	48.9822
CTSC	CD8_TEM	2.15728	0.890535	9426425988	0.673249	0	0	80.881	52.4083
TGFBR3	CD8_TEM	0.980033	0.641276	9.41112e+09	0.672156	0	0	54.346	20.6424
HLA-B	CD8_TEM	32.6211	9.63496	9.4095e+09	0.672041	0	0	99.6906	98.1305
LAT	CD8_TEM	1.4337	0.696604	9.38738e+09	0.670461	0	0	70.6006	38.8976
CLEC2D	CD8_TEM	1.22707	0.657761	9.29965e+09	0.664195	0	0	64.3233	34.3322
SYNE2	CD8_TEM	1.60751	0.754819	9.29333e+09	0.663744	0	0	71.2609	40.2151
PRSS23	CD8_TEM	0.848011	0.522484	9.28288e+09	0.662997	0	0	50.2249	16.8741
ZNF683	CD8_TEM	1.02338	0.936296	9.27861e+09	0.662692	0	0	36.3083	4.08956
PRKCH	CD8_TEM	1.88358	0.874429	9.24734e+09	0.660459	0	0	74.4155	45.0628
PPP2R5C	CD8_TEM	1.54713	0.704046	9222469039	0.658682	0	0	73.1141	46.6972
LINC02446	CD8_TEM	1.19042	0.975219	9.20033e+09	0.657101	0	0	38.3114	7.1621
PAXX	CD8_TEM	1.68023	0.729383	9200322774	0.657101	0	0	77.1172	53.1423
TRBC2	CD8_TEM	2.13783	0.952424	9.1794e+09	0.655607	0	0	74.3198	45.7943
PYHIN1	CD8_TEM	1.05866	0.569407	9.17485e+09	0.655281	0	0	58.0651	27.3739
PLEK	CD8_TEM	2.58285	0.887952	9147984887	0.653363	0	0	84.6129	57.226
CX3CR1	CD8_TEM	1.29926	0.65755	9144766135	0.653133	0	0	58.668	28.2794
YWHAQ	CD8_TEM	1.55363	0.702027	9126956784	0.651861	0	0	72.3103	48.5097
APMAP	CD8_TEM	1.0688	0.50396	9.1053e+09	0.650314	0	0	61.6216	31.9083
ANXA6	CD8_TEM	1.94562	0.785724	9103870046	0.650212	0	0	77.6435	53.8581
PCED1B-AS1	CD8_TEM	2.40005	0.679627	9095791491	0.649635	0	0	84.9925	53.291
ZAP70	CD8_TEM	1.41227	0.595153	9.08907e+09	0.649155	0	0	69.8319	40.1432
MYL12A	CD8_TEM	7.30261	2.02239	9.06443e+09	0.647395	0	0	96.9315	88.9208
TRG-AS1	CD8_TEM	0.929221	0.576788	9.05109e+09	0.646442	0	0	50.4609	23.0085
MYL12B	CD8_TEM	3.7809	1.09471	9.0472e+09	0.646164	0	0	93.7642	80.7587
TPST2	CD8_TEM	1.05528	0.513794	9.02048e+09	0.644256	0	0	61.0507	34.2135
ITGB1	CD8_TEM	1.70116	0.76434	8.98174e+09	0.641489	0	0	67.6406	44.7453
PFN1	CD8_TEM	19.2891	4.31009	8.97825e+09	0.64124	0	0	99.0463	95.9467
ARL4C	CD8_TEM	1.30452	0.556564	8969394849	0.640608	0	0	66.1351	39.2451
GNG2	CD8_TEM	1.61944	0.634772	8.94569e+09	0.638915	0	0	72.6165	48.9029
ARL6IP1	CD8_TEM	1.40857	0.567719	8934598930	0.638122	0	0	71.9371	49.5895
C12orf57	CD8_TEM	2.3702	0.726776	8.92988e+09	0.637785	0	0	82.9702	58.8749
PTPRC	CD8_TEM	6.6476	1.83128	8.92707e+09	0.637584	0	0	97.8852	90.5972
HLA-E	CD8_TEM	10.1699	2.2458	8.91438e+09	0.636678	0	0	99.209	94.8516
AC243829.2	CD8_TEM	0.756435	0.579575	8.90397e+09	0.635935	0	0	35.1727	7.95587
ITM2A	CD8_TEM	0.975025	0.500783	8878646030	0.634126	0	0	52.3269	26.3132
SYTL3	CD8_TEM	1.31297	0.565542	8873021657	0.633724	0	0	63.8449	38.8176
DUSP2	CD8_TEM	2.34053	1.09456	8.84101e+09	0.631438	0	0	58.8817	34.7402
VAMP2	CD8_TEM	1.9889	0.648471	8.83699e+09	0.631151	0	0	83.3307	64.7274
TRGV2	CD8_TEM	0.806322	0.763178	8.82927e+09	0.630599	0	0	28.0182	2.03448
TBC1D10C	CD8_TEM	1.51628	0.565385	8.82716e+09	0.630449	0	0	72.9578	50.2489
CCL4L2	CD8_TEM	1.26669	0.658548	8.82442e+09	0.630253	0	0	42.7801	16.6437
SEPTIN7	CD8_TEM	2.09177	0.64171	8.79289e+09	0.628001	0	0	84.1281	66.5234
GBP5	CD8_TEM	1.1044	0.517389	8.77789e+09	0.62693	0	0	56.2151	32.0577
HBB	Erythrocyte	4430.97	4419.87	9.63912e+08	0.926395	0	0	89.1632	24.666
SLC25A37	Erythrocyte	17.7357	17.4589	9.53623e+08	0.916507	0	0	86.4655	17.9177
SLC25A39	Erythrocyte	10.9236	10.6061	9.44038e+08	0.907294	0	0	86.5112	24.5405
HBA1	Erythrocyte	91.7334	91.5053	9.39744e+08	0.903168	0	0	81.07	1.41498
HBA2	Erythrocyte	120.43	120.137	935771559	0.89935	0	0	80.2469	1.08814
SNCA	Erythrocyte	10.7961	10.6721	9.34654e+08	0.898276	0	0	81.4358	6.8
DCAF12	Erythrocyte	4.96616	4.84552	9.11597e+08	0.876116	0	0	78.5551	10.1231
ADIPOR1	Erythrocyte	5.8738	5.46916	9.11082e+08	0.875621	0	0	83.5391	29.7922
STRADB	Erythrocyte	3.55921	3.48096	8.9961e+08	0.864596	0	0	75.583	6.71256
BNIP3L	Erythrocyte	8.40786	7.78105	894944115	0.860111	0	0	82.8075	36.9052
FAM210B	Erythrocyte	2.78326	2.70014	8.86381e+08	0.851881	0	0	73.5711	7.17476
TRIM58	Erythrocyte	3.04527	2.98277	8.83227e+08	0.84885	0	0	71.8336	3.55491
BCL2L1	Erythrocyte	3.86648	3.66025	8.81036e+08	0.846744	0	0	76.2231	16.5758
RNF10	Erythrocyte	3.07636	2.74424	8.77768e+08	0.843603	0	0	80.567	26.3378
GYPC	Erythrocyte	6.49017	5.5236	8.77065e+08	0.842928	0	0	85.9168	49.44
HBD	Erythrocyte	22.4166	22.3673	8.76012e+08	0.841916	0	0	68.8615	0.900024
UBB	Erythrocyte	29.663	26.8037	8.75343e+08	0.841273	0	0	89.9406	80.6348
FKBP8	Erythrocyte	4.33745	3.54537	8.69377e+08	0.835539	0	0	85.6424	49.42
ALAS2	Erythrocyte	24.9428	24.8845	8.67019e+08	0.833273	0	0	66.8953	0.406713
FBXO7	Erythrocyte	3.43118	3.04061	8.63632e+08	0.830018	0	0	78.8294	30.1317
TENT5C	Erythrocyte	3.04527	2.65549	8.58163e+08	0.824762	0	0	78.738	22.3985
DMTN	Erythrocyte	1.97577	1.9201	8.50752e+08	0.817639	0	0	66.0265	3.79179
MKRN1	Erythrocyte	3.1797	2.86218	8.48848e+08	0.815809	0	0	74.8514	24.9907
MPP1	Erythrocyte	3.10517	2.81352	8.46439e+08	0.813494	0	0	72.2451	17.9059
RIOK3	Erythrocyte	3.03658	2.53502	8.25445e+08	0.793317	0	0	76.6804	34.4882
GMPR	Erythrocyte	1.68541	1.62759	8.23895e+08	0.791828	0	0	61.2254	4.09425
CA1	Erythrocyte	20.8811	20.8423	8.14789e+08	0.783076	0	0	56.8358	0.316122
FECH	Erythrocyte	1.97714	1.92926	8.10866e+08	0.779305	0	0	58.5277	4.38473
BLVRB	Erythrocyte	4.67032	3.90073	8.09542e+08	0.778033	0	0	74.8971	31.0756
NCOA4	Erythrocyte	4.4257	3.80858	8.09505e+08	0.777998	0	0	73.6626	35.7368
AHSP	Erythrocyte	7.06356	7.04907	8.04558e+08	0.773243	0	0	54.824	0.222379
YBX3	Erythrocyte	1.7316	1.49303	8.00853e+08	0.769683	0	0	65.7979	16.1117
BPGM	Erythrocyte	1.91038	1.83197	8.0059e+08	0.76943	0	0	58.299	7.01901
GUK1	Erythrocyte	4.8834	3.35531	792361320	0.761521	0	0	86.7398	68.6396
BSG	Erythrocyte	4.107	3.24901	7.90347e+08	0.759585	0	0	78.2807	51.5219
LGALS3	Erythrocyte	6.08825	4.60486	7.87975e+08	0.757306	0	0	77.5492	38.6285
SELENBP1	Erythrocyte	2.71742	2.71188	7.73865e+08	0.743745	0	0	48.8797	0.153227
HBM	Erythrocyte	7.43667	7.42216	7.67688e+08	0.737809	0	0	47.7366	0.211449
MAP2K3	Erythrocyte	2.00229	1.62174	7.63011e+08	0.733314	0	0	66.1637	28.5624
R3HDM4	Erythrocyte	1.59717	1.22278	7.60599e+08	0.730995	0	0	65.9351	28.2198
RNF11	Erythrocyte	1.49063	1.22471	7.57668e+08	0.728178	0	0	60.6767	20.9982
SLC4A1	Erythrocyte	1.99909	1.99464	755072686	0.725684	0	0	45.2675	0.141456
GABARAPL2	Erythrocyte	2.73251	1.98091	7.50615e+08	0.721399	0	0	73.2053	49.4362
PSMF1	Erythrocyte	1.87883	1.33306	742538327	0.713637	0	0	69.0901	38.8696
ISCA1	Erythrocyte	1.24874	1.01806	7.42182e+08	0.713295	0	0	57.2016	19.5359
GLUL	Erythrocyte	2.25286	1.64765	7.36474e+08	0.707809	0	0	65.7522	32.9425
2008-03-01	Erythrocyte	0.85048	0.78577	7.34124e+08	0.705551	0	0	45.9991	6.00927
EPB41	Erythrocyte	1.7348	1.13564	7.33312e+08	0.70477	0	0	70.5075	38.9184
PRDX2	Erythrocyte	2.94102	2.33031	7.32864e+08	0.70434	0	0	65.3406	37.5337
NFIX	Erythrocyte	0.744856	0.730553	7.30906e+08	0.702458	0	0	41.6095	1.3204
PITHD1	Erythrocyte	1.77549	1.5197	7.29218e+08	0.700836	0	0	55.3727	21.8887
TMOD1	Erythrocyte	0.677183	0.655269	7.19172e+08	0.69118	0	0	39.9634	2.059
HEMGN	Erythrocyte	0.891632	0.879254	716195125	0.68832	0	0	38.4545	0.924826
EIF1AY	Erythrocyte	3.28715	3.01905	7.15625e+08	0.687771	0	0	51.166	21.0402
C9orf78	Erythrocyte	2.07362	1.40927	7.14126e+08	0.686331	4.10785e-247	2.0139e-245	68.1756	44.5546
HBQ1	Erythrocyte	0.758573	0.746668	7.13453e+08	0.685684	0	0	37.9515	0.924196
BAG1	Erythrocyte	1.16827	0.822142	7.12764e+08	0.685022	0	0	58.4362	26.7872
HAGH	Erythrocyte	1.00777	0.772972	7.08938e+08	0.681345	0	0	52.4463	20.0738
ASCC2	Erythrocyte	0.917695	0.707056	7.07672e+08	0.680129	0	0	51.166	18.2741
GSPT1	Erythrocyte	0.946502	0.74835	7.0555e+08	0.678088	0	0	49.6113	16.5414
RPIA	Erythrocyte	0.863283	0.660841	6.90971e+08	0.664077	0	0	47.4166	17.6133
DPM2	Erythrocyte	0.828532	0.638188	6.90534e+08	0.663657	0	0	46.7764	16.7906
CCNDBP1	Erythrocyte	1.92364	1.42145	6.89417e+08	0.662584	9.07275e-209	3.8023e-207	58.1619	36.4676
GLRX5	Erythrocyte	0.77412	0.695793	6.84878e+08	0.658222	0	0	37.8144	7.17938
EIF1B	Erythrocyte	1.41244	0.884998	6.83803e+08	0.657189	1.91267e-190	7.09249e-189	61.0425	38.3111
PHOSPHO1	Erythrocyte	0.749428	0.747814	680823394	0.654325	0	0	30.9556	0.099629
EIF2AK1	Erythrocyte	0.983996	0.69033	6.80501e+08	0.654015	1.9856e-250	9.93536e-249	50.2058	23.1925
TCP11L2	Erythrocyte	0.741655	0.602357	6.80427e+08	0.653943	0	0	41.3352	12.0507
TUBB2A	Erythrocyte	0.747142	0.700853	6.79848e+08	0.653387	0	0	33.9278	3.72537
EMC3	Erythrocyte	0.976223	0.648034	6.77748e+08	0.651369	2.58319e-220	1.12943e-218	52.492	26.5959
RAD23A	Erythrocyte	1.80841	1.16515	6.76576e+08	0.650243	1.04464e-162	3.23412e-161	62.3228	43.9229
OPTN	Erythrocyte	1.20256	0.722643	6.76314e+08	0.64999	4.1762e-195	1.59913e-193	56.5615	30.7814
NPRL3	Erythrocyte	0.69273	0.537489	6.76214e+08	0.649895	0	0	41.9753	13.6876
EPB42	Erythrocyte	0.639232	0.637908	673294528	0.647089	0	0	29.4925	0.0775593
MYL4	Erythrocyte	0.67947	0.66846	6.7094e+08	0.644826	0	0	29.5839	0.667136
IFI27	Erythrocyte	2.47279	2.38827	6.70491e+08	0.644395	0	0	30.6356	1.92154
PRDX6	Erythrocyte	1.9209	1.16353	6.68699e+08	0.642672	1.86239e-141	4.94513e-140	63.6488	47.6115
CISD2	Erythrocyte	0.746685	0.556185	6.68025e+08	0.642024	2.32711e-281	1.32686e-279	42.524	16.1416
PDZK1IP1	Erythrocyte	0.621856	0.60114	667307642	0.641335	0	0	29.5839	1.43474
ATP6V0C	Erythrocyte	3.30544	1.1726	6.60113e+08	0.634421	1.08846e-109	2.20831e-108	80.9328	71.9372
STMP1	Erythrocyte	1.51806	0.807427	6.5072e+08	0.625393	5.51665e-112	1.14805e-110	61.6369	45.3188
TESC	Erythrocyte	0.812986	0.511282	6.50011e+08	0.624711	2.00836e-175	6.82785e-174	44.4444	21.2285
STOM	Erythrocyte	0.962506	0.570869	6.47408e+08	0.62221	7.91284e-144	2.14171e-142	48.0567	26.5045
CA2	Erythrocyte	0.707362	0.641142	6.47322e+08	0.622127	0	0	28.6237	4.51946
GYPB	Erythrocyte	0.598994	0.598004	6.44138e+08	0.619067	0	0	23.8683	0.058222
JAZF1	Erythrocyte	0.935071	0.508482	6.42124e+08	0.617131	1.99891e-121	4.53614e-120	50.4344	30.332
SEC62	Erythrocyte	1.75354	0.88385	6.35383e+08	0.610653	1.34694e-82	2.04498e-81	64.3347	52.7254
CDK6	HSPC	5.18519	4.97317	5.5066e+07	0.853667	1.25084e-110	9.68122e-108	77.037	15.9919
SOX4	HSPC	5.22222	5.13636	5.47491e+07	0.848753	8.98543e-253	2.51433e-249	72.5926	6.03746
SSBP2	HSPC	2.98519	2.74539	5.33702e+07	0.827376	1.99152e-85	1.03494e-82	74.8148	18.3158
STMN1	HSPC	4.16296	3.88094	5.17512e+07	0.802278	3.48795e-91	2.01399e-88	68.1481	13.8988
ELMO1	HSPC	4.02963	3.46023	5.12909e+07	0.795143	2.55823e-43	5.67443e-41	82.2222	37.6094
ETV6	HSPC	3.13333	2.67012	5.0781e+07	0.787238	1.54588e-49	3.98825e-47	74.8148	27.2594
FAM30A	HSPC	2.28148	2.24156	5.05808e+07	0.784134	0	0	58.5185	2.18389
ANKRD28	HSPC	2.15556	1.98385	5.05068e+07	0.782987	7.1976e-85	3.68771e-82	65.1852	12.9822
RNF220	HSPC	1.91852	1.81968	4.98612e+07	0.772978	4.58086e-107	3.47162e-104	60.7407	9.14681
DDAH2	HSPC	2.15556	1.988	4.9786e+07	0.771812	3.35725e-76	1.42008e-73	62.2222	13.4485
MSI2	HSPC	2.67407	2.49055	4.97793e+07	0.771709	1.93292e-68	6.89351e-66	63.7037	15.3326
PRSS57	HSPC	3.24444	3.19451	4.90983e+07	0.761152	6.37892e-275	2.10951e-271	54.0741	3.00973
EGFL7	HSPC	2.22222	2.2052	48973030	0.759209	0	0	52.5926	1.33336
SNHG7	HSPC	2.96296	2.68967	4.89156e+07	0.758319	8.42385e-49	2.08459e-46	63.7037	20.9172
NRIP1	HSPC	1.47407	1.36371	4.86929e+07	0.754867	2.29659e-92	1.36956e-89	57.7778	9.27845
SPINT2	HSPC	1.92593	1.651	4.84946e+07	0.751792	5.05343e-48	1.23375e-45	63.7037	19.9694
GIHCG	HSPC	4.76296	4.71503	4.84511e+07	0.751118	1.00615e-181	1.74289e-178	52.5926	4.29055
CD82	HSPC	2.15556	1.89638	4.8388e+07	0.75014	4.41944e-52	1.1821e-49	62.2222	17.6323
H2AFY	HSPC	3.1037	2.4161	4.82061e+07	0.74732	2.31446e-30	3.0069e-28	75.5556	38.5867
TSC22D1	HSPC	1.88148	1.70139	4.80276e+07	0.744553	1.20224e-82	5.91e-80	56.2963	9.59865
CAT	HSPC	2.8963	2.53647	4.78238e+07	0.741393	1.21734e-36	2.11881e-34	65.9259	26.1837
GNAQ	HSPC	1.94074	1.50349	4.76569e+07	0.738806	3.04568e-36	5.22607e-34	68.1481	25.596
AUTS2	HSPC	1.57778	1.453	4.76173e+07	0.738192	2.66381e-80	1.21127e-77	54.8148	9.35588
ARMH1	HSPC	1.19259	1.05986	4.73609e+07	0.734218	9.69595e-71	3.56272e-68	54.8148	10.4234
KDM5B	HSPC	1.04444	0.935166	4.72257e+07	0.732122	1.82395e-74	7.29119e-72	54.0741	9.6357
ATP8B4	HSPC	1.86667	1.7631	4.72223e+07	0.732069	1.34183e-85	7.07417e-83	52.5926	8.21884
ITGA4	HSPC	3.48889	2.33611	4.71708e+07	0.73127	2.33214e-23	2.08443e-21	82.2222	52.2493
P2RX1	HSPC	1.06667	0.933413	4.71591e+07	0.731089	8.56684e-76	3.58202e-73	54.0741	9.33914
RERE	HSPC	1.82963	1.50962	4.70697e+07	0.729702	4.3394e-35	6.95393e-33	63.7037	24.2702
MT-CYB	HSPC	32.0444	16.1013	4.69972e+07	0.728579	3.44974e-20	2.49983e-18	98.5185	98.7589
RNF130	HSPC	2.81481	1.92892	4.6937e+07	0.727645	9.79478e-28	1.12046e-25	72.5926	33.6227
BEX3	HSPC	1.57778	1.37926	4.68676e+07	0.72657	1.22961e-55	3.46742e-53	55.5556	12.8099
NUCB2	HSPC	2.14815	1.81081	4.67962e+07	0.725464	1.52885e-34	2.4286e-32	61.4815	23.5266
MYL6B	HSPC	0.866667	0.812089	4.67389e+07	0.724575	1.97623e-130	2.1144e-127	48.8889	4.83218
SNHG29	HSPC	25.7185	23.214	4.65304e+07	0.721342	1.42415e-19	9.71975e-18	77.037	74.6206
LRBA	HSPC	1.97037	1.51935	4.64471e+07	0.720051	1.31224e-27	1.48246e-25	67.4074	31.0355
YWHAE	HSPC	1.87407	1.34068	4.6399e+07	0.719306	1.67156e-25	1.6751e-23	68.8889	35.2842
ITM2C	HSPC	1.75556	1.61475	4.63712e+07	0.718875	4.55308e-102	3.12505e-99	48.1481	5.96232
SEPTIN6	HSPC	3.0963	2.21646	4.63438e+07	0.718449	1.5943e-21	1.26078e-19	72.5926	50.0451
ST8SIA6	HSPC	1.04444	0.994863	4.62141e+07	0.716439	1.62426e-137	1.90599e-134	46.6667	4.22568
CCDC18-AS1	HSPC	1.42222	1.03211	4.61966e+07	0.716168	7.43155e-28	8.55499e-26	64.4444	29.008
APEX1	HSPC	3.25185	2.75484	4.61244e+07	0.715048	9.674e-25	9.33451e-23	62.963	34.9916
ANP32B	HSPC	5.13333	3.74294	4.611e+07	0.714825	2.50043e-19	1.66896e-17	74.0741	63.8937
PNISR	HSPC	2.95556	1.93818	4.6032e+07	0.713616	7.53428e-20	5.33219e-18	76.2963	56.9239
ZBTB20	HSPC	2.2	1.55049	4.59929e+07	0.71301	1.33937e-22	1.13308e-20	69.6296	40.0586
TAOK3	HSPC	2.46667	1.6444	4.59799e+07	0.712808	9.25934e-21	6.83219e-19	75.5556	48.7693
SNHG8	HSPC	3.57037	2.96317	4.58798e+07	0.711256	4.14474e-23	3.64187e-21	63.7037	36.9558
HMGA1	HSPC	2.8963	2.54065	4.58395e+07	0.710632	9.73199e-29	1.17615e-26	58.5185	25.5621
ATP2C1	HSPC	0.948148	0.829314	4.57141e+07	0.708687	8.48196e-56	2.41053e-53	50.3704	10.5963
AMD1	HSPC	1.4963	1.22233	4.56817e+07	0.708185	4.28151e-31	5.66358e-29	57.7778	22.1143
ZFAS1	HSPC	7.08148	5.74915	4.5605e+07	0.706997	3.49394e-18	2.16155e-16	73.3333	61.3892
LSM2	HSPC	1.88148	1.48831	4.55994e+07	0.706909	4.61433e-25	4.54893e-23	60	30.2882
TCF4	HSPC	0.955556	0.85179	4.54855e+07	0.705144	2.11568e-74	8.36546e-72	47.4074	7.34423
EBPL	HSPC	1.35556	1.21819	4.54752e+07	0.704984	8.23485e-48	1.99706e-45	49.6296	12.2158
IP6K2	HSPC	1.11111	0.86775	4.54562e+07	0.70469	1.01846e-31	1.41407e-29	57.037	20.5861
ARID1B	HSPC	1.54074	1.10864	4.54462e+07	0.704534	3.9396e-24	3.71272e-22	64.4444	30.9832
GAS5	HSPC	9.66667	8.11658	4.5435e+07	0.704361	6.87779e-18	4.14228e-16	70.3704	57.8644
UBE2E1	HSPC	0.992593	0.679826	4.54069e+07	0.703925	1.07856e-27	1.22609e-25	62.2222	24.739
MBOAT7	HSPC	1.04444	0.911124	4.53633e+07	0.703249	1.83617e-51	4.8755e-49	49.6296	10.9665
AFF3	HSPC	1.44444	1.1581	4.53502e+07	0.703045	1.71572e-56	4.95339e-54	50.3704	9.79496
TAF1D	HSPC	1.91111	1.33473	4.53106e+07	0.702432	8.61827e-21	6.3981e-19	68.1481	39.4875
IL18	HSPC	1.13333	1.05205	4.52422e+07	0.701371	6.25736e-81	2.95615e-78	45.1852	6.43029
IQGAP2	HSPC	2.21481	1.49682	4.52296e+07	0.701176	1.25841e-19	8.66992e-18	72.5926	43.1967
DNAJB6	HSPC	1.64444	1.13116	45172899	0.700298	4.78709e-21	3.6584e-19	67.4074	37.2618
FLT3	HSPC	0.918519	0.884351	4.51592e+07	0.700084	3.48175e-191	7.45034e-188	42.2222	2.538
SLC40A1	HSPC	1.55556	1.43052	4.51301e+07	0.699634	8.17363e-60	2.49859e-57	46.6667	8.84732
MT-CO3	HSPC	39	20.1142	4.50972e+07	0.699123	1.08229e-15	5.34197e-14	98.5185	99.2508
OLA1	HSPC	1.80741	1.40654	4.50472e+07	0.698349	5.95424e-23	5.14483e-21	60.7407	30.7534
FOXP1	HSPC	3.18519	1.75633	4.5024e+07	0.69799	9.7991e-17	5.39276e-15	82.963	61.4482
CLNS1A	HSPC	1.92593	1.44888	4.49907e+07	0.697472	3.46134e-21	2.66201e-19	61.4815	34.9025
NFE2	HSPC	1.82963	1.62842	4.49557e+07	0.69693	1.51744e-43	3.40741e-41	48.8889	12.4244
NREP	HSPC	0.725926	0.708007	4.49363e+07	0.69663	2.93561e-279	1.18654e-275	40.7407	1.65356
LUC7L3	HSPC	1.75556	1.20868	4.48944e+07	0.69598	6.57514e-20	4.6807e-18	66.6667	38.2333
ILF2	HSPC	1.82963	1.30342	4.48369e+07	0.695089	8.06253e-20	5.68393e-18	66.6667	38.1891
IMPDH2	HSPC	2.63704	2.36764	4.47891e+07	0.694347	2.42535e-28	2.86452e-26	52.5926	20.9536
ISYNA1	HSPC	0.77037	0.702064	4.47372e+07	0.693543	1.33434e-78	5.7785e-76	43.7037	6.10066
PNN	HSPC	1.65185	1.1178	4.4724e+07	0.693338	1.6949e-19	1.15244e-17	66.6667	37.9861
PEBP1	HSPC	2.34815	1.60653	4.46485e+07	0.692169	5.45332e-18	3.31731e-16	68.1481	43.3563
HMGN1	HSPC	3.02222	1.98571	4.46143e+07	0.691638	1.98805e-16	1.05576e-14	69.6296	53.9476
IGFBP7	HSPC	1.51852	1.20286	4.46121e+07	0.691604	3.41501e-31	4.58405e-29	53.3333	17.6532
MT-ND3	HSPC	11.163	5.7397	4.46117e+07	0.691597	9.85156e-15	4.49086e-13	94.8148	92.5951
MEF2C	HSPC	1.65185	1.10268	4.46015e+07	0.691439	3.04152e-24	2.88129e-22	61.4815	24.9271
SNHG6	HSPC	4.31111	3.155	4.45904e+07	0.691267	5.04433e-16	2.56282e-14	68.8889	57.8849
NME4	HSPC	1.2963	1.11144	4.45093e+07	0.69001	5.50709e-34	8.44738e-32	49.6296	15.5597
SLC39A3	HSPC	1.25926	1.11564	4.45019e+07	0.689895	1.61577e-39	3.09353e-37	47.4074	12.8848
TMEM14C	HSPC	1.84444	1.54486	4.4501e+07	0.689882	3.76917e-26	3.99741e-24	54.0741	22.0381
COMMD7	HSPC	1.24444	0.84558	4.44428e+07	0.688979	8.02333e-21	5.98084e-19	61.4815	31.218
PLAGL1	HSPC	0.711111	0.628678	4.44071e+07	0.688426	3.82979e-66	1.30202e-63	43.7037	6.96689
CHD9	HSPC	1.1037	0.782754	4.43899e+07	0.688159	5.66583e-24	5.31201e-22	58.5185	24.4527
SYPL1	HSPC	1.2963	1.04873	4.43674e+07	0.687811	8.13866e-28	9.33943e-26	52.5926	19.6751
ST13	HSPC	3.00741	2.14662	4.43493e+07	0.687529	3.17477e-16	1.65694e-14	67.4074	50.7207
FHL1	HSPC	1.16296	1.09012	4.43319e+07	0.68726	2.36199e-79	1.03521e-76	42.2222	5.62579
AKR1C3	HSPC	0.977778	0.859724	44326935	0.687183	1.12739e-60	3.62931e-58	44.4444	7.55708
BZW2	HSPC	1.06667	0.902761	4.42788e+07	0.686437	1.02356e-35	1.6848e-33	48.1481	13.9683
TAFA2	HSPC	0.792593	0.734583	4.42715e+07	0.686324	1.33561e-89	7.36145e-87	41.4815	4.8799
HSD17B11	HSPC	1.99259	1.43007	4.42171e+07	0.685481	4.87432e-18	2.98507e-16	63.7037	37.9608
ZNF428	HSPC	1.39259	0.992448	4.41886e+07	0.685038	6.52332e-20	4.65292e-18	58.5185	31.5514
VAV3	HSPC	1.43704	1.18911	4.41206e+07	0.683984	1.03807e-27	1.18376e-25	51.8519	18.7427
MLLT10	HSPC	0.792593	0.538106	4.40994e+07	0.683656	2.91444e-25	2.89668e-23	56.2963	21.2694
LINC02256	HSPC	0.962963	0.766677	4.40668e+07	0.68315	1.4168e-30	1.85392e-28	50.3704	16.2949
KLRB1	MAIT	9.09292	8.20716	8.1457e+08	0.946219	0	0	96.958	23.3333
GZMK	MAIT	6.16095	5.61973	8.02808e+08	0.932556	0	0	93.4735	9.06385
IL7R	MAIT	11.9989	10.0769	7.91512e+08	0.919435	0	0	98.5066	30.2262
KLRG1	MAIT	2.39934	2.03344	7.40677e+08	0.860384	0	0	85.5088	19.4162
TRAV1-2	MAIT	2.61228	2.54743	740217357	0.85985	0	0	73.7832	2.09369
SPOCK2	MAIT	2.40929	1.77883	6.93685e+08	0.805797	0	0	85.1217	32.9465
LYAR	MAIT	2.10564	1.59338	6.92896e+08	0.80488	0	0	81.9137	29.0156
NCR3	MAIT	1.8573	1.59498	6.87898e+08	0.799075	0	0	71.958	16.469
DUSP2	MAIT	5.8573	4.55677	6.83049e+08	0.793442	0	0	83.2412	36.1456
CD3E	MAIT	6.86726	3.77285	6.73764e+08	0.782656	0	0	98.9491	49.8467
IL32	MAIT	16.62	8.58696	6.72852e+08	0.781597	0	0	100	61.2978
LTB	MAIT	7.91925	4.49404	6.67938e+08	0.775888	0	0	93.4181	44.3979
SLC4A10	MAIT	1.09569	1.08831	664284832	0.771645	0	0	54.7566	0.500269
ALOX5AP	MAIT	2.04259	1.29779	6.57704e+08	0.764001	0	0	83.2412	37.0863
GZMA	MAIT	5.27821	2.45171	6.54224e+08	0.759958	0	0	95.4646	39.6099
CD3D	MAIT	3.02212	1.56067	6.51864e+08	0.757217	0	0	92.2013	38.4753
AQP3	MAIT	1.47124	1.09894	6.50559e+08	0.755701	0	0	66.3717	16.0099
RPLP0	MAIT	21.0288	8.32185	6.48702e+08	0.753544	1.23287e-304	8.15418e-302	100	92.798
MT-CYB	MAIT	25.057	9.14386	6.45293e+08	0.749583	4.45875e-295	2.84554e-292	99.8894	98.7546
RPS12	MAIT	58.6825	19.6033	6.35222e+08	0.737886	5.09861e-268	2.76824e-265	100	97.137
MT-ND4L	MAIT	12.0713	4.81872	6.35206e+08	0.737867	5.23977e-269	2.93242e-266	99.4469	92.9616
CD8A	MAIT	2.27489	1.56362	6.34828e+08	0.737427	0	0	65.708	18.1376
CXCR4	MAIT	4.56305	2.82542	6.33836e+08	0.736275	0	0	84.6239	46.9732
CD69	MAIT	6.53595	4.26519	6.28344e+08	0.729895	5.4135e-293	3.39529e-290	85.7301	47.6639
RPS3	MAIT	32.7102	10.5282	6.2465e+08	0.725605	2.34571e-241	1.12276e-238	100	95.3823
RPS27A	MAIT	38.4823	11.6223	6.23034e+08	0.723727	2.3647e-237	1.07526e-234	100	96.5744
ZFP36L2	MAIT	7.78208	4.01106	6.2198e+08	0.722502	9.27421e-239	4.27048e-236	95.4646	81.0165
RPSA	MAIT	15.4463	5.36768	6.20608e+08	0.720909	5.07563e-232	2.27946e-229	99.8894	90.2324
RPL3	MAIT	18.2345	6.55888	6.19969e+08	0.720167	2.61695e-230	1.16094e-227	99.6681	91.0634
CCL5	MAIT	13.8053	3.93932	6.17593e+08	0.717408	1.98538e-242	9.75977e-240	98.4513	57.8344
TC2N	MAIT	1.33352	0.898385	6.17372e+08	0.71715	0	0	66.6482	26.3733
EEF1A1	MAIT	91.2821	30.0019	6.16271e+08	0.715872	4.63241e-221	1.93693e-218	100	98.4484
RORA	MAIT	1.45409	0.90223	6.13621e+08	0.712793	0	0	70.1327	31.359
RPL10	MAIT	65.2782	19.0143	6.13251e+08	0.712363	5.184e-214	2.04977e-211	100	97.8422
CD3G	MAIT	1.75719	0.858229	6.13082e+08	0.712167	3.40493e-297	2.21181e-294	79.7566	34.3367
RPS4X	MAIT	23.8982	7.09343	6.10434e+08	0.709091	1.07628e-207	4.12126e-205	100	94.0505
GPR65	MAIT	1.20299	0.811246	6.09873e+08	0.70844	0	0	65.2102	27.8487
CST7	MAIT	4.80586	1.25725	6.07887e+08	0.706132	5.48109e-245	2.73131e-242	95.5752	43.6135
RPL13	MAIT	41.661	12.3145	6.07661e+08	0.705869	2.76437e-201	1.0056e-198	100	96.7396
GBP5	MAIT	1.5885	0.971222	6.06169e+08	0.704137	7.62026e-282	4.33129e-279	70.1327	33.5037
RPL5	MAIT	16.4475	4.73665	6.02529e+08	0.699908	3.36776e-190	1.09383e-187	100	92.8389
MT-CO3	MAIT	25.8225	6.95725	5.99672e+08	0.69659	7.65279e-184	2.31988e-181	99.8341	99.2483
BTG1	MAIT	7.48175	2.94442	5.98134e+08	0.694803	2.89034e-182	8.61818e-180	97.7323	86.8183
RPL17	MAIT	13.7389	4.3166	5.96979e+08	0.693461	2.21782e-178	6.45421e-176	99.7235	92.1515
ARL4C	MAIT	1.62168	0.840397	5.96838e+08	0.693298	5.27339e-226	2.28369e-223	75.885	40.8765
RPL34	MAIT	33.1034	8.93588	5.96386e+08	0.692773	9.03437e-177	2.58774e-174	100	95.6106
CTSW	MAIT	3.50221	0.833511	5.94388e+08	0.690452	1.70306e-208	6.59065e-206	89.6571	44.0915
PDCD4	MAIT	1.56416	0.8988	5.94153e+08	0.690179	1.85376e-218	7.66297e-216	71.4049	41.8541
CXCR6	MAIT	0.691925	0.669165	594140717	0.690164	0	0	39.3805	1.40882
RPL14	MAIT	20.1659	5.41584	5.93943e+08	0.689935	8.89523e-172	2.45138e-169	100	94.0886
RPS25	MAIT	17.8385	4.85728	5.92108e+08	0.687803	4.68771e-168	1.24471e-165	99.8894	92.7314
RPS21	MAIT	15.9812	4.39482	5.91846e+08	0.687498	1.47823e-167	3.89664e-165	99.9447	92.7997
RPL6	MAIT	20.8003	5.62529	5.91199e+08	0.686748	4.05357e-166	1.05326e-163	100	94.5477
RPL30	MAIT	39.3971	9.49161	5.91088e+08	0.686618	9.0565e-166	2.33651e-163	100	96.2938
RPL10A	MAIT	12.1604	3.58205	5.90567e+08	0.686014	3.15032e-165	8.07037e-163	99.5575	89.268
ERN1	MAIT	0.82135	0.63785	5.88989e+08	0.684181	0	0	49.7235	14.6567
FKBP11	MAIT	0.909292	0.593165	5.88679e+08	0.68382	0	0	55.7522	20.9275
RPS19	MAIT	28.7871	7.90638	5.87511e+08	0.682463	1.31932e-158	3.26482e-156	100	95.071
PCED1B-AS1	MAIT	2.79757	1.03648	587408157	0.682344	7.04738e-175	1.97202e-172	89.1593	55.2421
LINC01871	MAIT	0.793695	0.614354	5.8731e+08	0.68223	0	0	48.3407	12.6128
MT-ND5	MAIT	6.97566	2.26191	5.87223e+08	0.682129	1.72035e-159	4.28638e-157	98.7832	91.3913
RPL32	MAIT	37.6106	8.86749	5.86133e+08	0.680863	7.83798e-156	1.88823e-153	100	95.9897
PARP8	MAIT	1.48894	0.792785	5.85854e+08	0.680538	3.41243e-195	1.16013e-192	72.5111	42.6344
PBXIP1	MAIT	1.12887	0.680138	5.85515e+08	0.680145	1.06777e-245	5.47075e-243	61.6704	28.2394
RPS18	MAIT	26.0177	6.92924	5.85251e+08	0.679838	3.6422e-154	8.439e-152	99.8894	93.9602
EEF1B2	MAIT	9.00996	2.44397	5.85112e+08	0.679677	1.00114e-154	2.34958e-152	99.6681	86.7611
CALM1	MAIT	7.62555	2.33148	5.85021e+08	0.67957	1.09561e-154	2.55481e-152	99.3363	89.5065
GZMM	MAIT	1.75442	0.710512	5.83223e+08	0.677482	3.91447e-188	1.26015e-185	78.7611	41.436
IL2RG	MAIT	3.64878	1.24668	5.81969e+08	0.676026	5.33819e-155	1.2692e-152	95.2987	65.5025
RPS5	MAIT	13.6399	3.25727	5.81831e+08	0.675865	8.63109e-148	1.91447e-145	99.8341	90.2584
RPS27	MAIT	32.8191	8.9122	5.81183e+08	0.675113	3.11344e-146	6.82274e-144	99.8341	94.7833
RPL41	MAIT	58.7882	14.9662	5.81169e+08	0.675097	3.73987e-146	8.14641e-144	100	97.1591
CD2	MAIT	1.72235	0.803371	5.80784e+08	0.674649	6.77304e-186	2.08799e-183	73.5066	40.0337
RPS15A	MAIT	35.6079	8.21465	5.79058e+08	0.672644	3.59817e-142	7.65443e-140	100	96.2007
CD96	MAIT	1.1969	0.639779	5.78699e+08	0.672227	5.98744e-204	2.24541e-201	65.3208	32.7897
FLT3LG	MAIT	1.08573	0.531408	5.74684e+08	0.667563	6.30599e-200	2.24895e-197	64.2146	30.9854
RPS29	MAIT	7.64657	2.31891	5.74334e+08	0.667156	1.69634e-134	3.26496e-132	98.1195	84.5771
RPS7	MAIT	22.1471	5.06362	5.73992e+08	0.66676	7.61147e-133	1.44965e-130	100	95.016
LCK	MAIT	2.01549	0.758363	5.73551e+08	0.666248	1.08983e-152	2.50916e-150	82.7434	49.1799
HSP90AB1	MAIT	3.76051	1.37377	5.72602e+08	0.665145	1.20914e-134	2.33962e-132	92.3673	74.1647
LBH	MAIT	1.34956	0.668259	5.7118e+08	0.663493	1.21595e-168	3.2765e-166	68.3075	38.0857
ZBTB16	MAIT	0.660951	0.504549	5.70228e+08	0.662387	0	0	43.3075	11.4778
MT-ATP6	MAIT	19.2716	5.4388	5.70181e+08	0.662333	4.6971e-126	8.50082e-124	99.7788	97.9662
RPS23	MAIT	27.6803	6.05011	5.68558e+08	0.660447	4.32187e-123	7.41588e-121	100	94.8652
RPS6	MAIT	17.6305	4.04525	5.68303e+08	0.660151	9.34705e-123	1.59633e-120	99.7235	92.6001
RPS3A	MAIT	27.3042	5.88984	5.68202e+08	0.660033	1.80701e-122	3.05738e-120	100	95.2764
RPL18A	MAIT	26.5763	5.79943	5.67842e+08	0.659615	7.68546e-122	1.27659e-119	100	95.1095
RPL19	MAIT	33.4215	6.93476	5.67545e+08	0.659271	2.67889e-121	4.38964e-119	100	96.2327
RPS14	MAIT	32.323	6.58908	5.66924e+08	0.658549	3.18898e-120	5.13299e-118	100	95.9048
HCST	MAIT	4.65874	1.32864	5.66299e+08	0.657823	1.3684e-121	2.26265e-119	96.7367	77.0485
NPM1	MAIT	4.151	1.12217	5.65791e+08	0.657233	5.29097e-121	8.63092e-119	95.6858	77.2136
RPL28	MAIT	43.3324	9.12785	5.65762e+08	0.657199	3.38045e-118	5.3234e-116	100	97.0895
RPL23A	MAIT	12.6173	3.11322	5.64696e+08	0.655961	1.21515e-116	1.88904e-114	99.3363	90.9433
CNN2	MAIT	2.27157	0.739259	5.63434e+08	0.654495	7.87832e-124	1.36471e-121	84.292	61.1183
MT-CO1	MAIT	49.2942	8.66034	5.6247e+08	0.653375	1.30823e-112	1.95039e-110	99.8894	99.7704
GNLY	NK_CD56high	96.0225	85.0387	1.48249e+09	0.937433	0	0	98.4694	44.7954
CTSW	NK_CD56high	13.6717	11.077	1.4471e+09	0.915056	0	0	99.5198	43.8759
KLRC1	NK_CD56high	4.55312	4.38161	1.43122e+09	0.905016	0	0	84.7239	6.40302
KLRD1	NK_CD56high	6.42977	5.2631	1.43054e+09	0.904581	0	0	98.1092	31.9609
IL2RB	NK_CD56high	4.08133	3.71553	1.42698e+09	0.902331	0	0	90.2161	20.8179
XCL2	NK_CD56high	4.30222	4.15295	1.42527e+09	0.901251	0	0	84.3938	7.83701
IFITM2	NK_CD56high	15.3289	10.7714	1.41436e+09	0.894351	0	0	99.6098	81.6919
CD7	NK_CD56high	9.79292	8.15248	1.40761e+09	0.890082	0	0	94.2677	47.5344
IFITM1	NK_CD56high	23.5024	16.3859	1.38825e+09	0.877845	0	0	99.8199	71.2187
KLRF1	NK_CD56high	3.08043	2.63717	1.38375e+09	0.874998	0	0	88.5654	19.5851
GZMK	NK_CD56high	6.05252	5.52858	1.38202e+09	0.873901	0	0	81.8427	8.87447
CMC1	NK_CD56high	4.38415	3.76362	1.37771e+09	0.87118	0	0	88.5054	29.0639
KLRK1	NK_CD56high	4.2605	3.37104	1.36658e+09	0.864137	0	0	93.3673	32.695
XCL1	NK_CD56high	3.39136	3.31608	1.36424e+09	0.862662	0	0	75.3301	5.02992
HOPX	NK_CD56high	4.9955	4.08887	1.36338e+09	0.862117	0	0	91.2065	29.6722
TRDC	NK_CD56high	3.16327	2.84581	1.34324e+09	0.849379	0	0	79.982	14.4136
JAK1	NK_CD56high	5.64076	3.92357	1.32828e+09	0.839921	0	0	96.6387	72.361
NKG7	NK_CD56high	37.9241	25.4486	1321842842	0.835851	0	0	99.91	54.0264
MATK	NK_CD56high	2.19328	1.8517	1.32116e+09	0.835421	0	0	81.3625	20.5874
DUSP2	NK_CD56high	6.91897	5.64052	1.30462e+09	0.824961	0	0	87.0348	35.9677
GZMA	NK_CD56high	9.98259	7.19699	1.30226e+09	0.823466	0	0	92.7371	39.4497
SELL	NK_CD56high	6.12575	4.80981	1.29418e+09	0.81836	0	0	87.7851	46.3693
SH2D1B	NK_CD56high	1.71008	1.47667	1.29161e+09	0.81673	0	0	74.1597	12.3046
SRGN	NK_CD56high	12.3457	6.86825	1.28318e+09	0.811406	0	0	99.3697	86.2123
PRF1	NK_CD56high	7.36825	4.48801	1.26703e+09	0.801189	0	0	95.4982	39.5588
HCST	NK_CD56high	7.54472	4.23914	1.24723e+09	0.788671	0	0	97.8992	76.9772
IFITM3	NK_CD56high	8.20648	3.069	1.22895e+09	0.777112	0	0	97.2089	72.2127
STK17A	NK_CD56high	2.32773	1.68298	1.22786e+09	0.776421	0	0	81.2125	38.0736
CD300A	NK_CD56high	1.95348	1.4538	1.22039e+09	0.771696	0	0	76.6507	30.0015
ID2	NK_CD56high	3.09154	1.97004	1.21658e+09	0.769292	0	0	86.6146	44.3711
NCAM1	NK_CD56high	1.26501	1.15131	1.21128e+09	0.765937	0	0	59.7839	8.15052
NCR1	NK_CD56high	1.12815	0.973792	1.21127e+09	0.76593	0	0	62.7551	10.9995
GZMB	NK_CD56high	9.54532	6.75259	1.20586e+09	0.762509	0	0	83.8235	35.5284
SAMD3	NK_CD56high	1.76381	1.2864	1.20482e+09	0.761851	0	0	74.7599	27.3718
PLAC8	NK_CD56high	3.34784	2.14578	1.1968e+09	0.756782	0	0	86.0444	50.9338
CD63	NK_CD56high	2.66056	1.59061	1.19559e+09	0.756018	0	0	87.2449	50.0415
IL2RG	NK_CD56high	5.0018	2.6132	1194977765	0.755629	0	0	96.0984	65.4012
CST7	NK_CD56high	6.73169	3.20064	1.19459e+09	0.755382	0	0	97.569	43.4326
FCER1G	NK_CD56high	6.9886	2.71804	1.1938e+09	0.754886	0	0	96.1885	49.9646
CD2	NK_CD56high	2.98019	2.07263	1.1917e+09	0.753556	0	0	79.5918	39.8835
TPST2	NK_CD56high	1.80192	1.23535	1.18792e+09	0.751168	0	0	77.3409	35.6835
ZFP36L2	NK_CD56high	7.77731	4.01914	1.18345e+09	0.748341	0	0	97.419	80.9563
MAP3K8	NK_CD56high	2.05132	1.44639	1.18121e+09	0.746922	0	0	74.1897	31.497
CLIC3	NK_CD56high	2.54862	1.832	1.17469e+09	0.742799	0	0	69.5978	23.4145
KLRB1	NK_CD56high	3.12815	2.22687	1.17465e+09	0.742774	0	0	70.048	23.2858
TXK	NK_CD56high	1.39886	1.02676	1.17291e+09	0.741674	0	0	68.2473	23.2179
EIF3G	NK_CD56high	3.57203	1.98458	1.17261e+09	0.741488	0	0	91.4766	68.8637
KLRC2	NK_CD56high	2.27041	1.70062	1.16306e+09	0.735449	0	0	63.7155	16.813
AC092821.3	NK_CD56high	1.503	1.0366	1.16297e+09	0.735392	0	0	71.5786	30.9511
UBB	NK_CD56high	5.16327	2.19663	1161581738	0.734512	0	0	97.2989	80.5607
RAC2	NK_CD56high	7.16867	3.23304	1.15969e+09	0.733315	0	0	98.2293	83.3258
HSH2D	NK_CD56high	1.29622	0.956068	1.15956e+09	0.733233	0	0	66.3265	24.2044
CHST12	NK_CD56high	1.34844	0.932534	1159276008	0.733054	0	0	70.078	27.375
LY6E	NK_CD56high	5.10234	2.53078	1157860694	0.732159	0	0	94.5078	71.6917
H3F3B	NK_CD56high	12.6158	5.014	1.15366e+09	0.729502	0	0	99.5198	94.2537
HLA-A	NK_CD56high	28.9397	11.1407	1.15204e+09	0.728479	0	0	99.97	97.2555
CD247	NK_CD56high	3.98289	1.88022	1151700707	0.728264	0	0	91.7767	53.4463
NCALD	NK_CD56high	1.06573	0.850051	1.14994e+09	0.72715	0	0	58.7335	14.9591
APOBEC3G	NK_CD56high	1.67017	1.0604	1.14876e+09	0.726402	0	0	74.0996	33.9333
SYTL3	NK_CD56high	2.06753	1.29201	1.14815e+09	0.726019	0	0	77.581	40.1987
MCTP2	NK_CD56high	1.18187	0.879578	1.14136e+09	0.721727	0	0	62.3049	20.8919
SEPTIN7	NK_CD56high	2.95168	1.46978	1.13844e+09	0.71988	0	0	91.2065	67.513
CXCR3	NK_CD56high	0.984694	0.845418	1.13781e+09	0.719479	0	0	51.8007	8.70612
PTGDR	NK_CD56high	1.009	0.783474	1.13617e+09	0.718445	0	0	57.503	14.8255
ZAP70	NK_CD56high	1.98739	1.13918	1.13524e+09	0.717853	0	0	79.4118	41.8286
LITAF	NK_CD56high	3.70768	1.79124	1.13341e+09	0.716697	0	0	91.6567	66.9498
ARL4C	NK_CD56high	1.94628	1.16997	1.13297e+09	0.716418	0	0	76.8607	40.7572
CCL5	NK_CD56high	23.5498	13.7649	1132021849	0.71582	0	0	87.3649	57.7818
LINC00299	NK_CD56high	1.02851	0.791065	1.1273e+09	0.712831	0	0	56.1525	14.2544
IER2	NK_CD56high	7.07863	4.35233	1.12644e+09	0.71229	0	0	93.0372	73.2774
APMAP	NK_CD56high	1.46459	0.872771	1.12625e+09	0.712172	0	0	72.3589	33.5871
RHOC	NK_CD56high	1.69778	0.903095	1125940889	0.711975	0	0	74.1897	34.3831
BTG1	NK_CD56high	8.03962	3.51566	1.12439e+09	0.710997	0	0	97.9892	86.7814
ARPC5L	NK_CD56high	1.5009	0.920794	1.12034e+09	0.708435	0	0	72.0888	36.8078
IL18RAP	NK_CD56high	0.730792	0.675219	1.12006e+09	0.708254	0	0	45.7083	4.4819
GPR65	NK_CD56high	1.2443	0.855452	1.11848e+09	0.707258	0	0	64.6759	27.7325
RUNX3	NK_CD56high	1.27911	0.838774	1.11785e+09	0.706856	0	0	66.7167	29.7069
CD96	NK_CD56high	1.45078	0.897493	1.11684e+09	0.706218	0	0	70.3181	32.6501
ATP8B4	NK_CD56high	0.766206	0.666794	1.11518e+09	0.705167	0	0	48.1993	7.95078
CBLB	NK_CD56high	1.39556	0.918105	1.11343e+09	0.704066	0	0	65.9664	29.8479
ANXA6	NK_CD56high	2.46218	1.25953	1.11328e+09	0.703966	0	0	83.9436	55.2181
PDCD4	NK_CD56high	1.64736	0.985469	1.10994e+09	0.701858	0	0	73.7395	41.7429
CALM1	NK_CD56high	8.28511	3.00315	1.10951e+09	0.701582	0	0	99.2497	89.4756
CLDND1	NK_CD56high	1.19208	0.87662	1.1094e+09	0.701518	0	0	59.0936	22.6573
IRF1	NK_CD56high	3.7377	1.8582	1.10936e+09	0.701492	0	0	88.4154	64.7461
EVL	NK_CD56high	3.40186	1.51643	1.10674e+09	0.699836	0	0	91.8067	64.0262
XBP1	NK_CD56high	1.59034	0.916144	1.10631e+09	0.699558	0	0	71.3685	37.4995
SLC38A1	NK_CD56high	1.30222	0.800101	1103251739	0.697628	0	0	68.0672	32.7178
PFN1	NK_CD56high	22.6297	7.41967	1.10094e+09	0.696166	0	0	99.94	96.1234
PLAAT4	NK_CD56high	3.53872	1.67899	1.10036e+09	0.695799	0	0	89.1657	64.9475
AGK	NK_CD56high	0.830132	0.689053	1.09983e+09	0.695465	0	0	49.4898	12.0749
ISG20	NK_CD56high	2.02701	1.01636	1.09405e+09	0.691809	0	0	78.5714	47.8671
CAPN12	NK_CD56high	0.610444	0.56174	1092722364	0.690969	0	0	42.0768	4.28258
GZMM	NK_CD56high	2.36375	1.32639	1.09259e+09	0.690888	0	0	73.8896	41.3503
AREG	NK_CD56high	2.006	1.73875	1.09039e+09	0.689494	0	0	47.0888	10.6369
CD69	NK_CD56high	6.64466	4.38835	1.08951e+09	0.68894	0	0	78.6615	47.5913
BHLHE40	NK_CD56high	1.48379	1.04529	1.08679e+09	0.687216	0	0	58.7935	24.4724
RPSA	NK_CD56high	14.9961	4.93151	1085552511	0.686436	6.43771e-303	1.12589e-300	99.5198	90.204
MIF	NK_CD56high	4.05042	1.56197	1.08226e+09	0.684354	6.79712e-304	1.19449e-301	94.7179	77.8808
ACAP1	NK_CD56high	1.61104	0.830382	1080069667	0.682969	0	0	75.6002	45.9429
PRF1	NK_CD56low	9.7606	8.71043	3.55397e+10	0.925898	0	0	95.9651	24.7253
GZMB	NK_CD56low	9.57328	8.56342	3.54348e+10	0.923165	0	0	94.8098	19.8458
NKG7	NK_CD56low	37.8031	31.9852	3.54318e+10	0.923085	0	0	98.6929	42.2943
GNLY	NK_CD56low	38.5758	34.3367	3.53246e+10	0.920294	0	0	95.1936	31.5747
CST7	NK_CD56low	10.6556	9.03241	3.50317e+10	0.912663	0	0	96.2638	29.5548
CTSW	NK_CD56low	7.93086	6.68823	3.47942e+10	0.906475	0	0	95.8026	30.2573
CD247	NK_CD56low	6.01015	4.95274	3.46861e+10	0.903659	0	0	96.1766	42.1735
KLRD1	NK_CD56low	3.77349	3.2686	3.43107e+10	0.893879	0	0	90.9277	16.5221
FGFBP2	NK_CD56low	6.72334	5.97677	3.41619e+10	0.890002	0	0	88.6209	16.6496
GZMA	NK_CD56low	7.77499	6.28154	3.39367e+10	0.884134	0	0	94.3398	25.0047
GZMH	NK_CD56low	6.93235	5.55967	3.34345e+10	0.871052	0	0	91.9283	20.7026
CCL5	NK_CD56low	24.7358	18.892	3.33872e+10	0.86982	0	0	96.0836	47.6349
SPON2	NK_CD56low	4.41812	4.10735	3.32439e+10	0.866086	0	0	81.0839	14.1351
FCGR3A	NK_CD56low	3.89123	2.91823	3.24324e+10	0.844945	0	0	84.9993	19.9307
HOPX	NK_CD56low	2.87499	2.46704	3.21246e+10	0.836925	0	0	79.8708	16.5754
KLRF1	NK_CD56low	1.72519	1.60694	3.19457e+10	0.832263	0	0	71.522	6.08195
CCL4	NK_CD56low	8.1483	7.08493	3.1459e+10	0.819584	0	0	79.768	19.6167
CLIC3	NK_CD56low	2.53588	2.29743	3.11507e+10	0.811552	0	0	70.6702	10.9814
ADGRG1	NK_CD56low	1.69174	1.4887	3.09645e+10	0.806702	0	0	70.4744	10.5035
KLRK1	NK_CD56low	2.25642	1.70855	3.09482e+10	0.806277	0	0	80.4337	20.2591
GZMM	NK_CD56low	2.44037	1.77255	3.05979e+10	0.797151	0	0	83.0479	30.3068
TTC38	NK_CD56low	1.40719	1.24536	3.0472e+10	0.793871	0	0	67.6252	11.1874
S1PR5	NK_CD56low	1.35932	1.20974	3.04345e+10	0.792894	0	0	66.6167	9.35269
LITAF	NK_CD56low	3.74064	2.30407	3.02413e+10	0.787861	0	0	92.2064	60.3049
TRBC1	NK_CD56low	3.01676	2.40481	29922756101	0.779562	0	0	72.8751	23.8252
FCRL6	NK_CD56low	1.36374	1.15499	2.98796e+10	0.778437	0	0	66.2809	11.4737
APMAP	NK_CD56low	1.5518	1.21314	2.97035e+10	0.773851	0	0	72.3484	23.3968
CD7	NK_CD56low	3.59714	2.41619	2.93748e+10	0.765286	0	0	83.3201	38.2234
IFITM1	NK_CD56low	12.6268	6.86264	2.92656e+10	0.762441	0	0	96.3206	64.6503
KLRC2	NK_CD56low	2.15618	2.00244	2.92005e+10	0.760744	0	0	57.331	6.21739
PRSS23	NK_CD56low	1.19584	1.06325	2.91296e+10	0.758897	0	0	59.0992	8.18084
KLRB1	NK_CD56low	2.53094	2.05281	2.91254e+10	0.75879	0	0	63.5982	12.7448
CX3CR1	NK_CD56low	1.7184	1.31445	2.86825e+10	0.747249	0	0	66.7832	20.3503
TRDC	NK_CD56low	1.14577	1.02819	2.84375e+10	0.740868	0	0	52.7939	4.56446
C12orf75	NK_CD56low	1.523	1.03276	2.84265e+10	0.740581	0	0	70.7789	25.0843
PYHIN1	NK_CD56low	1.29137	0.972608	28396672975	0.739804	0	0	65.3224	19.621
SLC9A3R1	NK_CD56low	2.4707	1.44544	2.83905e+10	0.739643	0	0	83.561	48.8065
ZAP70	NK_CD56low	1.73539	1.11818	28306433708	0.737453	0	0	75.9064	32.9006
IL2RB	NK_CD56low	1.15761	0.974053	2.8254e+10	0.736087	0	0	57.2282	11.5381
IFITM2	NK_CD56low	7.42124	3.54647	2.82234e+10	0.735289	0	0	93.7299	78.5792
PLAAT4	NK_CD56low	3.2452	1.74711	2.81246e+10	0.732717	0	0	87.8455	58.9393
IL2RG	NK_CD56low	3.96692	1.98408	2.80757e+10	0.731441	0	0	91.7844	58.5032
PRKCH	NK_CD56low	2.04842	1.24876	2.79997e+10	0.729462	0	0	78.3551	38.4637
MATK	NK_CD56low	0.994899	0.814457	27931155782	0.727676	0	0	56.2432	11.4362
SH2D1B	NK_CD56low	0.94286	0.889161	2.78557e+10	0.725711	0	0	48.0619	3.1353
SH2D2A	NK_CD56low	1.12465	0.877276	2.78268e+10	0.724956	0	0	59.764	16.8803
CHST12	NK_CD56low	1.03393	0.777711	2.78075e+10	0.724455	0	0	61.2317	18.5524
SYNE1	NK_CD56low	1.47687	1.00395	2.7789e+10	0.723973	0	0	69.0253	28.6653
GNG2	NK_CD56low	1.96466	1.19338	2.76916e+10	0.721434	0	0	77.7559	43.0398
C1orf21	NK_CD56low	0.826122	0.691091	2.7626e+10	0.719725	0	0	52.9916	9.48946
HCST	NK_CD56low	5.38808	2.61088	2.75818e+10	0.718573	0	0	92.3591	72.9823
PTGDR	NK_CD56low	0.768385	0.683439	2.73146e+10	0.711613	0	0	48.0913	6.16337
LINC00299	NK_CD56low	0.849268	0.771081	2.72678e+10	0.710395	0	0	47.1494	5.68601
RHOC	NK_CD56low	1.42258	0.790528	2.71895e+10	0.708354	0	0	66.0273	26.1361
SYTL3	NK_CD56low	1.5624	0.989278	2.71616e+10	0.707627	0	0	69.5589	32.5509
PLEK	NK_CD56low	2.82216	1.35954	2.71202e+10	0.706548	0	0	85.34	51.8702
HLA-C	NK_CD56low	27.6481	9.49705	2.71181e+10	0.706493	0	0	99.0934	97.3367
TGFBR3	NK_CD56low	0.939991	0.711135	2.69881e+10	0.703106	0	0	54.2459	14.3216
CTSC	NK_CD56low	2.09658	0.981062	2.68736e+10	0.700124	0	0	80.1567	47.2424
APOBEC3G	NK_CD56low	1.28844	0.853717	2.68723e+10	0.70009	0	0	63.0724	26.3703
GNPTAB	NK_CD56low	0.977794	0.738789	2.68592e+10	0.699749	0	0	56.0082	18.8962
SKAP1	NK_CD56low	2.02578	0.987495	2.68049e+10	0.698334	0	0	80.421	43.1234
HLA-A	NK_CD56low	24.4316	8.33638	2.66568e+10	0.694475	0	0	98.9347	96.8232
SAMD3	NK_CD56low	1.02833	0.689232	2.65577e+10	0.691893	0	0	57.4318	19.6226
SYNE2	NK_CD56low	1.57712	0.858338	2.65334e+10	0.691261	0	0	70.727	34.5128
SPN	NK_CD56low	1.39341	0.823085	2.63901e+10	0.687527	0	0	66.555	33.0366
TPST2	NK_CD56low	1.12131	0.694544	2.63561e+10	0.686642	0	0	62.7121	28.7073
DHRS7	NK_CD56low	1.44838	0.798207	2.63345e+10	0.68608	0	0	72.1868	42.6564
CMC1	NK_CD56low	1.51421	1.10318	2.62799e+10	0.684656	0	0	55.2984	22.4612
TRBC2	NK_CD56low	1.95368	0.897617	2.62411e+10	0.683647	0	0	75.3415	40.144
NCR1	NK_CD56low	0.575141	0.526503	26236141651	0.683516	0	0	40.1674	3.53151
B2M	NK_CD56low	98.5339	27.8222	2.61835e+10	0.682144	0	0	99.8815	99.7493
TBX21	NK_CD56low	0.72976	0.626901	2.61771e+10	0.681979	0	0	43.1096	7.11064
CALM1	NK_CD56low	7.28237	2.51743	2.61155e+10	0.680372	0	0	96.2226	87.7286
ARL4C	NK_CD56low	1.3876	0.767055	2.60865e+10	0.679617	0	0	67.1778	33.8971
ARPC5L	NK_CD56low	1.12524	0.685115	2.60386e+10	0.678369	0	0	62.0786	30.2528
RAC2	NK_CD56low	5.59071	2.07621	2.60006e+10	0.677379	0	0	93.3588	80.7313
NCR3	NK_CD56low	0.747511	0.609374	2.59998e+10	0.67736	0	0	44.1758	9.20608
TFDP2	NK_CD56low	0.762119	0.568969	2.59888e+10	0.677071	0	0	49.2525	15.0661
C5orf56	NK_CD56low	1.09238	0.664795	2.59817e+10	0.676888	0	0	61.9807	30.4257
CD300A	NK_CD56low	1.01472	0.642117	2.594e+10	0.675801	0	0	56.7533	23.1448
ITGB2	NK_CD56low	5.43823	1.94254	2.58466e+10	0.673368	0	0	92.9965	77.6939
STAT4	NK_CD56low	0.986371	0.624264	2.58128e+10	0.672487	0	0	56.5418	23.3765
EVL	NK_CD56low	2.74748	1.08288	2.58111e+10	0.672444	0	0	86.9007	58.0559
PDIA3	NK_CD56low	2.23195	1.02021	25781549822	0.671673	0	0	80.7588	57.8122
CCL4L2	NK_CD56low	1.79724	1.45732	2.57044e+10	0.669662	0	0	44.7897	11.1749
RUNX3	NK_CD56low	0.900299	0.577527	2.56972e+10	0.669477	0	0	55.1809	23.112
TXK	NK_CD56low	0.840114	0.586099	2.56821e+10	0.669082	0	0	49.5736	16.4546
RASSF1	NK_CD56low	0.985343	0.601853	2.56807e+10	0.669045	0	0	58.9582	28.3784
IGFBP7	NK_CD56low	0.907877	0.75273	2.56142e+10	0.667313	0	0	42.8697	10.813
CD99	NK_CD56low	3.83821	1.30779	2.56141e+10	0.66731	0	0	91.7854	74.5341
PLEKHF1	NK_CD56low	0.615382	0.503245	2.55979e+10	0.666889	0	0	41.6929	8.81413
MCTP2	NK_CD56low	0.736437	0.54433	2.5571e+10	0.666187	0	0	46.5668	14.2814
AC092821.3	NK_CD56low	0.982572	0.647263	2.54745e+10	0.663673	0	0	54.4916	24.9137
SEPTIN7	NK_CD56low	2.20991	0.912822	2.54723e+10	0.663618	0	0	83.6941	63.3255
EFHD2	NK_CD56low	1.33426	0.675483	2.54015e+10	0.661771	0	0	66.6383	36.8765
PTPN4	NK_CD56low	0.902707	0.543322	2.53269e+10	0.659827	0	0	55.6274	25.5031
NFATC2	NK_CD56low	0.820757	0.551698	2.53032e+10	0.659211	0	0	49.4982	18.8366
ABI3	NK_CD56low	0.986107	0.538397	25282808998	0.65868	0	0	55.2279	24.0995
STMN1	NK_Proliferating	19.533	19.2872	4.36154e+08	0.988452	0	0	98.7027	13.7497
PTMA	NK_Proliferating	54.0778	41.0555	4.2142e+08	0.95506	0	0	100	96.5817
TUBA1B	NK_Proliferating	26.9914	25.5133	4.20667e+08	0.953354	0	0	98.5946	58.9782
MCM7	NK_Proliferating	4.24541	4.12349	4.19602e+08	0.95094	0	0	92.5405	10.2047
TUBB	NK_Proliferating	17.4432	16.4247	4.12959e+08	0.935884	0	0	97.1892	52.684
GZMA	NK_Proliferating	19.2097	16.4057	4.11478e+08	0.932529	0	0	99.1351	39.7061
DUT	NK_Proliferating	6.69189	6.15213	4.10308e+08	0.929876	0	0	94.5946	36.5631
HMGB2	NK_Proliferating	9.3773	8.67883	4.0971e+08	0.928522	0	0	95.5676	40.666
H2AFZ	NK_Proliferating	9.60108	8.433	4.09374e+08	0.92776	0	0	98.3784	57.808
PPIA	NK_Proliferating	22.5676	16.5966	4.08806e+08	0.926472	0	0	99.8919	90.5444
HMGB1	NK_Proliferating	15.6984	12.7538	4.08474e+08	0.925719	0	0	99.5676	85.6151
PFN1	NK_Proliferating	57.8043	42.6251	4.08065e+08	0.924794	0	0	99.8919	96.1428
HMGN2	NK_Proliferating	14.4973	12.5131	408012117	0.924673	0	0	98.2703	72.3351
DEK	NK_Proliferating	5.7827	4.91132	4.05567e+08	0.919132	0	0	96.5405	50.116
HNRNPA2B1	NK_Proliferating	14.8054	11.2666	4.04812e+08	0.917421	0	0	99.6757	87.5776
GZMB	NK_Proliferating	21.4162	18.6124	4.04736e+08	0.917249	0	0	98.2703	35.7441
PCNA	NK_Proliferating	3.44108	3.32818	4.04106e+08	0.915821	0	0	86.4865	9.50198
TPI1	NK_Proliferating	9.59892	7.43125	4.04015e+08	0.915616	0	0	99.4595	74.2161
CALM1	NK_Proliferating	17.853	12.5744	4.03925e+08	0.915411	0	0	99.7838	89.5239
CTSW	NK_Proliferating	14.8865	12.2383	4.03867e+08	0.915279	0	0	99.4595	44.1568
SNRPB	NK_Proliferating	5.04216	4.1834	4.03323e+08	0.914046	0	0	95.5676	51.4396
NKG7	NK_Proliferating	58.0854	45.5206	4.03151e+08	0.913658	0	0	99.8919	54.2579
CFL1	NK_Proliferating	29.3492	20.9147	4.0264e+08	0.912499	0	0	99.5676	93.5758
MCM5	NK_Proliferating	2.93514	2.79273	4.01241e+08	0.909328	0	0	86.4865	11.8597
HSP90AA1	NK_Proliferating	10.8119	8.23509	3.99156e+08	0.904603	0	0	98.9189	77.8962
IDH2	NK_Proliferating	4.33838	3.77603	3.98798e+08	0.903792	0	0	92.8649	36.5432
RAN	NK_Proliferating	6.55892	5.19902	3.96772e+08	0.899199	0	0	97.2973	64.7882
MCM3	NK_Proliferating	2.48649	2.35512	3.94698e+08	0.8945	0	0	84	11.3119
CHCHD2	NK_Proliferating	8.87135	6.34632	3.94588e+08	0.894251	0	0	99.4595	80.8728
TYMS	NK_Proliferating	6.12757	6.10216	393570564	0.891945	0	0	78.8108	0.873745
NASP	NK_Proliferating	3.12973	2.79808	3.93386e+08	0.891525	0	0	88.1081	25.6468
C12orf75	NK_Proliferating	4.22486	3.52074	3.93253e+08	0.891225	0	0	93.6216	34.7349
NUCKS1	NK_Proliferating	4.4227	3.7172	3.93002e+08	0.890657	0	0	93.4054	44.83
HNRNPA3	NK_Proliferating	5.85297	4.5709	392953014	0.890545	0	0	97.4054	62.7199
PRF1	NK_Proliferating	14.9059	12.0177	3.92851e+08	0.890315	0	0	98.0541	39.8361
RALY	NK_Proliferating	4.15243	3.31125	3.92388e+08	0.889265	0	0	95.5676	52.0801
DNMT1	NK_Proliferating	2.74486	2.40679	3.92243e+08	0.888935	0	0	88.973	25.9987
GAPDH	NK_Proliferating	40.3016	28.7792	3.91461e+08	0.887164	0	0	99.8919	93.4415
SLBP	NK_Proliferating	3.04432	2.74577	3.90155e+08	0.884203	0	0	86.2703	24.184
CST7	NK_Proliferating	13.4551	9.92097	3.88751e+08	0.881021	0	0	99.5676	43.7019
CRIP1	NK_Proliferating	21.4681	15.7786	3.87868e+08	0.879021	0	0	99.8919	81.6279
CD247	NK_Proliferating	8.92973	6.82717	3.87297e+08	0.877726	0	0	97.0811	53.6295
HNRNPF	NK_Proliferating	5.49297	4.37633	3.86897e+08	0.87682	0	0	94.7027	58.0194
RAC2	NK_Proliferating	12.9632	9.02254	3.86868e+08	0.876755	0	0	99.2432	83.3991
SUMO2	NK_Proliferating	6.79784	4.66182	3.86036e+08	0.874869	0	0	98.2703	78.1168
CARHSP1	NK_Proliferating	2.58162	2.33029	3.85991e+08	0.874767	0	0	84.4324	20.2137
SLC9A3R1	NK_Proliferating	5.48	4.1539	3.85797e+08	0.874329	0	0	96.1081	56.1559
DBI	NK_Proliferating	5.3027	3.9838	385177593	0.872924	0	0	95.4595	61.9912
PSMB9	NK_Proliferating	7.95135	5.57012	3.85031e+08	0.872592	0	0	99.4595	77.1455
GZMH	NK_Proliferating	11.2714	8.7275	3.84804e+08	0.872077	0	0	97.4054	35.8038
HMGN1	NK_Proliferating	4.39459	3.36404	3.84415e+08	0.871195	0	0	94.7027	53.8731
GNLY	NK_Proliferating	79.0984	67.6527	3.8404e+08	0.870346	0	0	93.6216	45.0756
HOPX	NK_Proliferating	5.37405	4.44752	3.83887e+08	0.87	0	0	91.4595	29.9822
HLA-C	NK_Proliferating	47.6703	27.5431	3.83049e+08	0.868099	0	0	99.8919	97.7079
PAXX	NK_Proliferating	4.2227	3.23026	3.82872e+08	0.867698	0	0	93.7297	54.6393
MIF	NK_Proliferating	8.47892	5.99118	3.82772e+08	0.867472	0	0	97.9459	77.9595
ANP32B	NK_Proliferating	5.85946	4.47668	3.82377e+08	0.866576	0	0	96.6486	63.8331
UBB	NK_Proliferating	9.75243	6.78361	382170494	0.866109	0	0	98.4865	80.6428
RANBP1	NK_Proliferating	2.54703	2.22564	3.81992e+08	0.865705	0	0	85.1892	25.9212
CD99	NK_Proliferating	8.38486	5.58578	3.81801e+08	0.865272	0	0	98.7027	78.1809
KLRD1	NK_Proliferating	5.62595	4.43116	3.81461e+08	0.864501	0	0	94.4865	32.3017
PPDPF	NK_Proliferating	8.71351	5.89679	3.81139e+08	0.863772	0	0	99.027	80.4845
DNAJC9	NK_Proliferating	1.77622	1.64911	3.8104e+08	0.863547	0	0	79.027	11.1799
SLC25A5	NK_Proliferating	7.13514	5.3148	3.8067e+08	0.862709	0	0	97.1892	66.4203
B2M	NK_Proliferating	161.799	85.3069	3.80392e+08	0.862079	0	0	100	99.7772
LDHA	NK_Proliferating	5.46703	4.21762	3.80259e+08	0.861776	0	0	94.9189	58.8193
ARPC5L	NK_Proliferating	2.99027	2.40841	3.79556e+08	0.860184	0	0	90.1622	36.9507
CLSPN	NK_Proliferating	1.86919	1.85221	379406594	0.859845	0	0	72.7568	1.19322
YWHAQ	NK_Proliferating	4.15784	3.2665	3.78546e+08	0.857894	0	0	92.3243	49.989
H2AFV	NK_Proliferating	4.18162	3.54446	3.78388e+08	0.857538	0	0	89.1892	41.4788
COX8A	NK_Proliferating	6.81081	4.78375	3.77138e+08	0.854703	0	0	97.8378	72.6106
FEN1	NK_Proliferating	1.84432	1.80081	3.76993e+08	0.854375	0	0	73.0811	3.85932
CCL5	NK_Proliferating	35.6303	25.7993	3.76535e+08	0.853336	0	0	96.8649	57.9127
RPA3	NK_Proliferating	2.18054	1.94213	3.76518e+08	0.8533	0	0	80.6486	19.5117
ACTB	NK_Proliferating	165.528	109.132	3.76227e+08	0.852639	1.40602e-301	1.31145e-299	100	99.2879
SIVA1	NK_Proliferating	2.65081	2.1764	3.75555e+08	0.851115	0	0	86.4865	35.6579
PPP1CA	NK_Proliferating	6.0573	4.27347	3.75274e+08	0.85048	0	0	97.5135	70.6212
MCM4	NK_Proliferating	1.51892	1.49139	3.74664e+08	0.849097	0	0	71.3514	2.29652
CCND3	NK_Proliferating	5.62595	3.89892	3.74303e+08	0.848278	0	0	96.3243	70.274
ENO1	NK_Proliferating	6.36	4.64574	3.74239e+08	0.848134	0	0	96.4324	68.8865
DHFR	NK_Proliferating	1.94162	1.89423	3.73662e+08	0.846827	0	0	71.7838	3.94359
CTSC	NK_Proliferating	4.45838	3.13929	3.73618e+08	0.846727	0	0	96.1081	54.1948
PA2G4	NK_Proliferating	3.27243	2.55475	3.7336e+08	0.846141	0	0	90.1622	46.5431
TMEM106C	NK_Proliferating	1.88432	1.7838	3.73268e+08	0.845933	0	0	74.3784	9.17453
NCL	NK_Proliferating	5.75351	4.0922	3.73192e+08	0.845761	1.69258e-306	1.61604e-304	96.973	69.1298
PDIA3	NK_Proliferating	5.25405	3.83172	3.72048e+08	0.843168	0	0	94.4865	62.6541
CENPX	NK_Proliferating	2.13405	1.87183	371975637	0.843004	0	0	80.3243	22.0648
NUDT1	NK_Proliferating	1.91243	1.67996	3.71954e+08	0.842955	0	0	79.4595	19.2111
PGAM1	NK_Proliferating	3.87568	2.78331	3.7182e+08	0.842652	0	0	93.5135	55.856
ARPC2	NK_Proliferating	11.3157	7.12884	3.71758e+08	0.84251	4.58297e-288	4.00757e-286	99.027	88.4319
GSTP1	NK_Proliferating	9.08541	5.95186	3.71601e+08	0.842155	1.82944e-293	1.6432e-291	98.3784	72.407
COX6A1	NK_Proliferating	6.28649	4.04647	3.71124e+08	0.841074	5.01391e-292	4.47036e-290	98.3784	78.7106
TMEM109	NK_Proliferating	2.05189	1.72756	3.70828e+08	0.840404	0	0	82.1622	25.687
IL2RG	NK_Proliferating	7.11568	4.71799	3.70776e+08	0.840285	5.5484e-295	5.03327e-293	97.9459	65.5525
NDUFB2	NK_Proliferating	4.46919	3.06271	3.706e+08	0.839886	2.68825e-301	2.49465e-299	95.027	65.2045
PCLAF	NK_Proliferating	2.46162	2.44198	370367673	0.83936	0	0	68.5405	0.983173
HLA-A	NK_Proliferating	42.493	24.664	3.70335e+08	0.839286	1.67459e-279	1.38133e-277	100	97.2691
RRM2	NK_Proliferating	5.00541	4.95739	3.68903e+08	0.836041	0	0	68.5405	2.43466
SNRPD1	NK_Proliferating	2.3773	1.92024	3.68289e+08	0.834649	0	0	85.5135	34.5282
ATP5MC3	NK_Proliferating	4.51243	3.12584	368179509	0.834401	1.62136e-293	1.45991e-291	95.4595	64.1211
PRKCH	OTHER_T	3.88991	2.8331	6.35063e+08	0.815461	0	0	90.7034	46.8381
CBLB	OTHER_T	2.27462	1.79691	6.05678e+08	0.777728	0	0	75.841	29.9427
SKAP1	OTHER_T	3.46116	2.21945	5.93695e+08	0.762341	0	0	88.318	50.9658
SYNE1	OTHER_T	2.27829	1.59629	5.93271e+08	0.761797	0	0	79.5719	37.1448
RABGAP1L	OTHER_T	3.20673	2.07204	5.88275e+08	0.755382	0	0	87.0336	56.505
KLF12	OTHER_T	1.82385	1.37071	5.86127e+08	0.752624	0	0	72.3547	29.0254
PARP8	OTHER_T	2.45015	1.75701	5.85543e+08	0.751874	0	0	78.1651	42.6258
SYNE2	OTHER_T	2.61407	1.71774	5.83854e+08	0.749705	0	0	82.2018	42.1144
FYN	OTHER_T	2.75535	1.73227	5.7468e+08	0.737925	1.61892e-277	1.95005e-275	83.6697	52.9213
STAT4	OTHER_T	1.72416	1.23287	5.74325e+08	0.737469	0	0	71.1927	30.3239
LRBA	OTHER_T	1.57125	1.12365	5.72318e+08	0.734892	0	0	70.3364	30.9109
TGFBR3	OTHER_T	1.4263	1.04907	5.65155e+08	0.725695	0	0	64.526	22.7101
RORA	OTHER_T	1.87951	1.32878	5.58649e+08	0.71734	7.90445e-301	1.06496e-298	68.318	31.3793
ATXN1	OTHER_T	1.66972	1.18502	5.57378e+08	0.715708	2.19465e-294	2.85124e-292	67.8287	31.9974
ARHGAP15	OTHER_T	3.87278	2.20611	5.5578e+08	0.713656	1.51887e-209	1.36088e-207	87.2783	65.4801
PITPNC1	OTHER_T	1.98349	1.39373	5.55393e+08	0.713159	2.08406e-261	2.32552e-259	69.9694	37.741
PIP4K2A	OTHER_T	1.48807	1.05948	5.54397e+08	0.71188	3.69758e-292	4.73616e-290	65.9327	30.7207
UTRN	OTHER_T	2.49235	1.32581	551592347	0.708279	3.61205e-210	3.24433e-208	83.6697	54.9558
PPP2R5C	OTHER_T	2.00612	1.12069	5.41917e+08	0.695855	1.28792e-195	1.08201e-193	77.0642	48.3317
ANKRD44	OTHER_T	2.40856	1.29767	5.40681e+08	0.694268	5.6607e-181	4.3906e-179	81.7125	58.1424
ATP8A1	OTHER_T	0.950459	0.698486	5.37618e+08	0.690335	0	0	55.0459	19.4618
PPP1R16B	OTHER_T	1.01713	0.773993	5.2625e+08	0.675738	1.08477e-297	1.42973e-295	50.581	17.7791
MACF1	OTHER_T	1.53456	0.888533	5.26164e+08	0.675627	1.19016e-171	8.71113e-170	68.6239	40.5734
SAMD3	OTHER_T	1.33394	0.850477	5.24479e+08	0.673463	4.37527e-209	3.91055e-207	59.4495	27.5932
NCALD	OTHER_T	0.931498	0.712334	5.2387e+08	0.672682	0	0	48.0734	15.1517
RAP1GAP2	OTHER_T	1.3792	0.83208	5.23033e+08	0.671608	9.94548e-181	7.68125e-179	62.8746	33.7802
TNIK	OTHER_T	1.04159	0.696696	5.22889e+08	0.671423	6.80553e-224	6.447e-222	55.5963	24.3229
MALAT1	OTHER_T	95.4128	29.4926	5.2224e+08	0.670589	9.11768e-126	4.64529e-124	100	99.3674
SYTL3	OTHER_T	1.72722	0.945927	5.21945e+08	0.67021	3.02266e-160	2.06295e-158	69.1743	40.3607
TOX	OTHER_T	1.0893	0.840983	5.2065e+08	0.668548	2.26023e-301	3.07942e-299	47.4618	15.7683
IQGAP2	OTHER_T	1.54251	0.826915	5.18866e+08	0.666257	2.43296e-149	1.5103e-147	69.6636	43.1141
FOXN3	OTHER_T	1.94373	0.973931	5.1668e+08	0.663449	3.94729e-132	2.15278e-130	75.474	53.7205
RUNX1	OTHER_T	1.36697	0.821848	5.15287e+08	0.661661	2.4975e-156	1.63109e-154	61.896	35.6231
PYHIN1	OTHER_T	1.25015	0.726036	5.14933e+08	0.661206	7.41346e-174	5.52622e-172	59.5107	29.2836
SLFN12L	OTHER_T	0.748012	0.551328	5.14775e+08	0.661003	8.31008e-279	1.0043e-276	46.2997	15.556
CNOT6L	OTHER_T	1.09358	0.753431	5.14265e+08	0.660348	9.57653e-188	7.77601e-186	54.0673	26.0331
PPP2R2B	OTHER_T	0.877676	0.655733	5.14224e+08	0.660296	3.45783e-276	4.09725e-274	46.1774	15.5426
MBNL1	OTHER_T	4.24954	1.70903	5.1341e+08	0.65925	5.41159e-113	2.48871e-111	91.5596	81.7403
THEMIS	OTHER_T	1.45872	1.09784	5.12197e+08	0.657693	3.70565e-219	3.44758e-217	47.8287	19.9323
CELF2	OTHER_T	2.56453	1.08585	5.11392e+08	0.65666	9.94673e-114	4.60346e-112	84.3425	67.3012
CDC42SE2	OTHER_T	1.80917	0.938181	510656262	0.655715	2.22488e-122	1.10115e-120	72.3547	51.3599
STK39	OTHER_T	0.669113	0.506012	5.10509e+08	0.655525	1.55935e-295	2.04044e-293	43.3028	13.3504
ARAP2	OTHER_T	0.922936	0.593451	5.10089e+08	0.654987	6.15428e-184	4.88809e-182	52.6606	24.2788
CDK17	OTHER_T	0.965749	0.669959	5.0901e+08	0.6536	1.81262e-189	1.4918e-187	50.8257	22.7575
SIK3	OTHER_T	1.7841	0.951719	5.08695e+08	0.653196	2.61188e-126	1.34769e-124	68.0122	43.1263
CHST11	OTHER_T	1.27829	0.695188	5.06825e+08	0.650796	8.30253e-135	4.65364e-133	61.4679	36.2076
CEMIP2	OTHER_T	1.17859	0.747639	5.06143e+08	0.649919	1.47394e-153	9.43969e-152	54.8624	28.6815
SMYD3	OTHER_T	1.1156	0.766696	5.05867e+08	0.649564	1.45706e-170	1.05584e-168	50.581	24.4278
TC2N	OTHER_T	1.21651	0.780653	5.04479e+08	0.647783	4.76e-157	3.13685e-155	52.9052	26.4351
TNRC6B	OTHER_T	1.41223	0.725641	5.04226e+08	0.647458	7.12465e-117	3.37026e-115	66.7278	44.4376
CD96	OTHER_T	1.28379	0.726734	5.0366e+08	0.646731	1.27723e-134	7.12604e-133	59.0214	32.8231
LINC01934	OTHER_T	0.923547	0.75462	5.01287e+08	0.643683	2.38288e-282	2.94837e-280	39.2049	11.7025
MT-CO1	OTHER_T	50.5003	9.8674	5.00868e+08	0.643146	3.79809e-89	1.35587e-87	100	99.7701
PRKCQ	OTHER_T	0.88318	0.542924	5.00571e+08	0.642765	1.50992e-156	9.87886e-155	50.8257	24.1999
SLC38A1	OTHER_T	1.11437	0.608758	4.9975e+08	0.64171	5.66687e-126	2.90343e-124	58.3486	32.8771
ATP2B4	OTHER_T	0.918654	0.537541	4.99684e+08	0.641626	2.7888e-143	1.6713e-141	52.9664	26.9083
ARID1B	OTHER_T	1.02018	0.589792	4.99493e+08	0.64138	7.89747e-131	4.23726e-129	55.107	30.9099
VPS13B	OTHER_T	0.985933	0.570025	4.99476e+08	0.641358	3.08961e-133	1.70031e-131	54.8012	29.9985
DOCK10	OTHER_T	1.48807	0.755834	4.99294e+08	0.641125	1.59274e-108	7.03145e-107	65.3823	42.7031
P2RY8	OTHER_T	1.4367	0.755145	4.986e+08	0.640233	2.03831e-109	9.07561e-108	62.9358	40.9559
ZBTB20	OTHER_T	1.42813	0.78086	4.97774e+08	0.639173	2.86531e-109	1.27111e-107	61.4067	39.9937
MT-ND4L	OTHER_T	9.60367	2.34082	4.97381e+08	0.638668	4.33073e-84	1.46548e-82	99.0214	92.9654
STAG1	OTHER_T	0.919878	0.530948	4.96809e+08	0.637934	1.89336e-131	1.0234e-129	52.9052	28.4275
FAM172A	OTHER_T	0.932722	0.567301	4.96727e+08	0.637828	4.2941e-134	2.3812e-132	51.6208	27.5485
NCOA1	OTHER_T	0.995719	0.562381	495868486	0.636726	1.13867e-124	5.72911e-123	54.6177	29.9702
BCL11B	OTHER_T	0.978593	0.55514	4.95466e+08	0.636209	1.12136e-133	6.19933e-132	52.0489	26.4811
ARL15	OTHER_T	0.906422	0.559789	4.95382e+08	0.636102	7.85926e-141	4.64117e-139	49.1743	24.6325
RNF19A	OTHER_T	0.948012	0.563919	4.93403e+08	0.63356	6.3351e-126	3.23669e-124	51.1927	27.5233
ITGAL	OTHER_T	1.29297	0.584579	4.92625e+08	0.632561	1.93336e-96	7.65285e-95	64.4037	42.2578
PIK3R5	OTHER_T	1.2263	0.585311	4.90998e+08	0.630472	2.83255e-95	1.09384e-93	62.263	40.9622
IKZF3	OTHER_T	0.907034	0.506	4.90446e+08	0.629763	1.58873e-121	7.79935e-120	50.6422	26.5376
EPB41	OTHER_T	1.21713	0.614879	4.90152e+08	0.629386	4.13346e-96	1.62204e-94	59.8165	38.9917
EML4	OTHER_T	1.37125	0.694171	4.88961e+08	0.627856	1.57514e-90	5.73564e-89	61.6514	41.8213
MAPRE2	OTHER_T	1.48563	0.899715	4.88474e+08	0.627231	5.0881e-97	2.02505e-95	55.4128	35.8629
KLRG1	OTHER_T	0.913761	0.54203	4.87592e+08	0.626098	8.06384e-143	4.80882e-141	44.2202	19.5819
DENND4A	OTHER_T	0.951682	0.517597	485903467	0.62393	2.38546e-103	9.97425e-102	51.5596	29.7128
RNF213	OTHER_T	2.3633	0.856248	4.85699e+08	0.623668	9.59918e-72	2.76039e-70	81.0398	65.3367
GNG2	OTHER_T	1.77248	0.748734	4.85603e+08	0.623544	1.98733e-77	6.14215e-76	69.419	50.3933
BCAS3	OTHER_T	0.886239	0.546878	4.82724e+08	0.619847	3.05157e-110	1.37215e-108	45.8716	24.4686
ITGA4	OTHER_T	2.03119	0.880766	4.8245e+08	0.619496	1.76653e-71	5.05992e-70	69.3578	52.1991
MT-CYB	OTHER_T	20.1578	4.22455	4.8225e+08	0.619239	1.7529e-62	4.44667e-61	99.9388	98.7548
ARIH1	OTHER_T	0.915596	0.503642	4.8134e+08	0.618071	9.1262e-97	3.62824e-95	49.6024	28.3882
JCHAIN	Plasmablast	485.611	485.474	5.05841e+08	0.983083	0	0	96.9416	7.40071
MZB1	Plasmablast	62.9101	62.8662	5.05565e+08	0.982546	0	0	96.6636	3.17443
HSP90B1	Plasmablast	82.0723	80.8002	5.02177e+08	0.975962	0	0	98.5171	59.6373
SEC11C	Plasmablast	25.7516	25.3829	4.99562e+08	0.97088	0	0	96.2929	28.3537
ITM2C	Plasmablast	29.3976	29.3225	4.98653e+08	0.969112	0	0	94.3466	5.77428
PPIB	Plasmablast	83.1548	80.8208	4.98044e+08	0.967929	0	0	98.8879	77.2503
SPCS2	Plasmablast	12.5301	11.8744	4.96637e+08	0.965195	0	0	97.0343	44.5444
ISG20	Plasmablast	20.6951	19.7219	4.96245e+08	0.964433	0	0	97.2196	47.97
TXNDC5	Plasmablast	17.5236	17.4978	4.95555e+08	0.963092	0	0	92.8638	2.28992
UBE2J1	Plasmablast	18.8378	18.3622	4.95466e+08	0.962919	0	0	95.3661	31.9687
POU2AF1	Plasmablast	8.41335	8.36023	4.94908e+08	0.961834	0	0	93.0491	3.33569
SSR4	Plasmablast	52.8795	51.0652	4.937e+08	0.959486	0	0	97.8684	73.8995
SSR3	Plasmablast	15.43	14.9008	4.92596e+08	0.957342	0	0	95.088	35.7032
SUB1	Plasmablast	41.0519	39.2249	4.92172e+08	0.956517	0	0	97.9611	72.8072
GNG7	Plasmablast	6.20389	6.08537	4.91931e+08	0.956049	0	0	92.9564	7.30425
FKBP11	Plasmablast	15.6645	15.3809	4.91283e+08	0.954789	0	0	93.5125	20.8953
SEC61B	Plasmablast	22.1455	20.7487	4.90921e+08	0.954087	0	0	97.0343	65.4352
MYDGF	Plasmablast	18.3012	17.8349	4.905e+08	0.953267	0	0	94.7173	34.072
PDIA4	Plasmablast	14.5709	14.3231	4.90471e+08	0.953212	0	0	93.4198	20.2022
DERL3	Plasmablast	18.3244	18.3112	490049731	0.952393	0	0	90.6395	1.1328
LMAN1	Plasmablast	11.3503	11.0604	4.89805e+08	0.951917	0	0	93.7905	23.4798
XBP1	Plasmablast	21.9296	21.2971	4.89632e+08	0.951581	0	0	94.6247	37.6069
EAF2	Plasmablast	7.13531	6.97269	4.88795e+08	0.949954	0	0	92.5857	11.623
CD79A	Plasmablast	15.5097	14.9157	4.88267e+08	0.948927	0	0	94.81	8.06902
TENT5C	Plasmablast	7.58573	7.20005	4.87098e+08	0.946657	0	0	94.2539	22.4942
SPCS1	Plasmablast	17.6877	16.6216	487020420	0.946505	0	0	95.8295	60.0273
SDF2L1	Plasmablast	9.92493	9.63128	4.83947e+08	0.940531	0	0	92.0297	22.1403
RABAC1	Plasmablast	11.6719	10.6541	4.83296e+08	0.939267	0	0	96.1075	57.8171
HSPA5	Plasmablast	25.0315	23.9739	4.83233e+08	0.939144	0	0	94.9954	49.5929
HM13	Plasmablast	11.7507	11.1131	4.83027e+08	0.938744	0	0	93.6979	40.8633
PDIA6	Plasmablast	13.2493	12.6894	4.82061e+08	0.936866	0	0	93.2345	36.9513
SELENOS	Plasmablast	5.92308	5.61769	4.8203e+08	0.936807	0	0	92.3077	24.2614
OSTC	Plasmablast	8.89249	8.39671	4.81847e+08	0.936451	0	0	93.0491	35.5149
HERPUD1	Plasmablast	12.24	11.6268	4.81568e+08	0.935908	0	0	93.6979	38.6115
SPCS3	Plasmablast	10.8387	10.4153	4.81451e+08	0.93568	0	0	92.4004	31.4233
TXNDC11	Plasmablast	6.76182	6.57811	481341422	0.935468	0	0	90.1761	15.2745
CALR	Plasmablast	23.1418	21.6832	4.80008e+08	0.932876	0	0	95.8295	58.144
MIF	Plasmablast	19.7516	17.2913	4.78581e+08	0.930104	0	0	97.5904	77.9539
SEC61G	Plasmablast	11.0788	10.1261	4.78458e+08	0.929865	0	0	94.0686	55.1235
TMEM258	Plasmablast	11.7804	10.6169	4.78409e+08	0.92977	0	0	94.9954	60.1642
TMBIM6	Plasmablast	15.2521	13.5474	4.77095e+08	0.927216	0	0	96.5709	72.0406
MANF	Plasmablast	7.85542	7.62992	4.76992e+08	0.927015	0	0	89.5273	18.3562
CD27	Plasmablast	11.329	10.949	4.76922e+08	0.926879	0	0	90.3614	18.6406
ERLEC1	Plasmablast	6.59778	6.34878	476888404	0.926814	0	0	90.0834	20.6613
KDELR2	Plasmablast	7.07229	6.69616	4.76876e+08	0.926789	0	0	91.6589	29.3227
PEBP1	Plasmablast	10.4291	9.70894	4.76561e+08	0.926177	0	0	93.7905	43.2493
TRAM1	Plasmablast	6.33272	5.76457	4.76428e+08	0.925919	0	0	93.1418	39.8028
DAD1	Plasmablast	9.34291	8.40202	4.76069e+08	0.925221	0	0	94.532	55.3948
TMED9	Plasmablast	7.45598	6.93706	4.76015e+08	0.925117	0	0	92.493	37.5161
P4HB	Plasmablast	13.8981	13.0278	475810451	0.924719	0	0	94.532	50.0609
LMAN2	Plasmablast	9.02688	8.35562	4.75678e+08	0.924462	0	0	93.0491	44.8388
TMED10	Plasmablast	7.35681	6.77267	4.75123e+08	0.923383	0	0	92.6784	40.6463
PLPP5	Plasmablast	3.93976	3.77602	4.75094e+08	0.923327	0	0	88.5079	10.6068
CD59	Plasmablast	4.11121	4.01354	4.75028e+08	0.923197	0	0	87.1177	8.19631
IGHA1	Plasmablast	192.422	192.292	4.74293e+08	0.92177	0	0	85.1715	3.42062
RPN2	Plasmablast	11.38	10.7793	4.73772e+08	0.920758	0	0	92.0297	40.9931
TPD52	Plasmablast	3.84986	3.68419	4.73754e+08	0.920722	0	0	88.3225	13.023
DDOST	Plasmablast	8.62373	8.07536	4.73617e+08	0.920457	0	0	92.493	38.3343
VOPP1	Plasmablast	5.7924	5.37456	4.73575e+08	0.920375	0	0	91.3809	30.3569
AQP3	Plasmablast	10.2845	9.93049	4.73384e+08	0.920003	0	0	89.1566	16.0353
PRDX4	Plasmablast	7.29379	7.13874	472965513	0.91919	0	0	87.2104	13.7137
RPN1	Plasmablast	9.90454	9.283	4.72071e+08	0.917452	0	0	92.3077	42.02
SSR2	Plasmablast	12.2725	10.5749	4.72002e+08	0.917317	0	0	95.9222	70.7824
ZBP1	Plasmablast	4.86376	4.6519	4.71447e+08	0.916238	0	0	88.0445	16.8502
KRTCAP2	Plasmablast	8.4393	7.19032	4.70756e+08	0.914896	0	0	95.3661	64.8133
PIM2	Plasmablast	10.4977	10.1252	4.70426e+08	0.914255	0	0	89.4347	23.0883
RPL36AL	Plasmablast	14.8795	11.9382	4.70258e+08	0.913928	0	0	97.0343	83.0697
RPLP0	Plasmablast	74.4717	61.873	4.68953e+08	0.911391	0	0	98.9805	92.8113
COX5A	Plasmablast	8.31789	7.09939	4.68336e+08	0.910193	0	0	94.6247	59.853
SERP1	Plasmablast	14.6627	12.3573	4.6823e+08	0.909986	0	0	96.3855	73.8348
SEL1L3	Plasmablast	3.97961	3.87952	4.67899e+08	0.909343	0	0	84.7081	8.12564
NME2	Plasmablast	14.988	12.5987	4.67598e+08	0.908758	0	0	96.5709	73.5489
COPE	Plasmablast	8.38554	7.30775	4.67093e+08	0.907777	0	0	94.532	57.9978
DNAJB11	Plasmablast	4.63948	4.45397	4.67051e+08	0.907696	0	0	86.469	16.012
SEC61A1	Plasmablast	4.48285	4.22469	4.66753e+08	0.907116	0	0	87.7665	21.589
CD38	Plasmablast	9.97498	9.7549	4.66742e+08	0.907095	0	0	85.6348	13.9064
COX7A2	Plasmablast	9.2595	7.77138	466304179	0.906244	0	0	94.7173	68.1144
CPNE5	Plasmablast	2.82762	2.7898	4.65982e+08	0.905618	0	0	82.3911	2.81962
KDELR1	Plasmablast	5.69694	5.0722	4.64599e+08	0.902929	0	0	91.0102	42.2333
ZNF706	Plasmablast	5.25023	4.60344	4.644e+08	0.902543	0	0	91.8443	41.6323
ERGIC3	Plasmablast	5.78128	5.14907	4.63778e+08	0.901334	0	0	91.2882	42.3121
B4GALT3	Plasmablast	3.41983	3.24644	4.62759e+08	0.899354	0	0	84.8934	15.4853
OST4	Plasmablast	11.2549	8.95782	4.62509e+08	0.898869	0	0	96.2002	79.8655
SELENOK	Plasmablast	5.53753	4.87503	4.62392e+08	0.898641	0	0	91.8443	43.8133
ARF4	Plasmablast	5.44022	5.019	4.62012e+08	0.897903	0	0	88.1372	31.6707
CRELD2	Plasmablast	4.01761	3.85874	4.61187e+08	0.896299	0	0	84.2447	13.785
RPL22L1	Plasmablast	6.7025	5.95491	4.60823e+08	0.895591	0	0	91.0102	45.1466
ATP5MG	Plasmablast	17.4764	13.9397	4.60803e+08	0.895553	0	0	97.127	85.3779
CYBA	Plasmablast	23.2678	18.6311	4.60638e+08	0.895233	0	0	97.9611	84.0993
RPLP1	Plasmablast	153.81	110.04	4.60422e+08	0.894812	0	0	99.9073	98.0829
UQCRH	Plasmablast	11.114	9.48071	460381425	0.894733	0	0	95.088	68.626
MEF2C	Plasmablast	4.80445	4.26459	4.59976e+08	0.893945	0	0	90.2688	24.7896
ELL2	Plasmablast	4.25857	4.10764	4.59797e+08	0.893598	0	0	83.0399	11.1445
MT-CO2	Plasmablast	103.729	76.3441	4.59023e+08	0.892093	0	0	99.4439	99.6223
NDUFV2	Plasmablast	4.99073	4.34009	4.5899e+08	0.89203	0	0	91.3809	43.684
DERL1	Plasmablast	3.82576	3.53756	4.58876e+08	0.891808	0	0	86.747	23.938
REEP5	Plasmablast	4.56905	3.82294	4.58767e+08	0.891596	0	0	92.8638	46.2742
UBE2G1	Plasmablast	3.91381	3.62133	4.58083e+08	0.890266	0	0	86.3763	24.1303
NDUFB11	Plasmablast	7.44486	5.96564	4.5795e+08	0.890008	0	0	95.088	67.8938
EDF1	Plasmablast	7.59685	5.97813	4.57681e+08	0.889485	0	0	95.5514	71.7969
PPBP	Platelet	28.2256	27.3367	8.13942e+09	0.965108	0	0	97.8256	23.0691
TUBB1	Platelet	6.29281	6.12539	7726933453	0.916198	0	0	86.8828	7.67729
NRGN	Platelet	4.28049	3.98105	7.57206e+09	0.897834	0	0	87.6567	16.889
CAVIN2	Platelet	3.9515	3.80169	7.5254e+09	0.892302	0	0	83.0463	8.3333
PF4	Platelet	4.43395	4.26926	7.49278e+09	0.888434	0	0	82.4523	8.89487
CLU	Platelet	3.82654	3.59911	7.40601e+09	0.878145	0	0	82.4469	11.8631
SPARC	Platelet	3.32948	3.19248	7.37039e+09	0.873921	0	0	79.3951	7.73147
GNG11	Platelet	3.16997	3.06682	7.35693e+09	0.872326	0	0	78.3052	6.29349
MYL9	Platelet	4.10681	3.9373	7.3124e+09	0.867045	0	0	78.3542	8.01019
MPIG6B	Platelet	2.70338	2.62439	7.11753e+09	0.843939	0	0	71.9128	4.74585
GP9	Platelet	3.19575	3.12056	7.09124e+09	0.840822	0	0	70.8883	4.12966
HIST1H2AC	Platelet	3.7661	3.46642	6.9633e+09	0.825653	0	0	76.218	18.5064
TREML1	Platelet	1.82594	1.76005	6.84985e+09	0.8122	0	0	65.673	4.30655
ACRBP	Platelet	2.80512	2.71315	6.62919e+09	0.786036	0	0	61.2698	5.77456
GP1BB	Platelet	1.81106	1.73621	6.58183e+09	0.780421	0	0	59.6131	4.42818
TAGLN2	Platelet	9.44463	5.7366	6567106331	0.778675	0	0	98.2398	83.2823
CMTM5	Platelet	1.64387	1.60236	6.56487e+09	0.77841	0	0	57.842	2.75673
ITGA2B	Platelet	1.52981	1.47561	6.55587e+09	0.777343	0	0	58.2834	3.48519
CTSA	Platelet	2.61362	2.02577	6.54207e+09	0.775706	0	0	78.6049	35.0377
F13A1	Platelet	1.94905	1.68898	6.50421e+09	0.771218	0	0	65.3134	13.171
PTGS1	Platelet	1.37161	1.29703	6.41852e+09	0.761057	0	0	56.7902	5.82069
BEX3	Platelet	1.44932	1.30034	6.41761e+09	0.760949	0	0	60.7466	10.9086
GRAP2	Platelet	1.76785	1.43861	6.31386e+09	0.748647	0	0	67.7766	23.9207
RGS18	Platelet	2.00807	1.83542	6.24055e+09	0.739954	0	0	57.079	11.8877
TPM4	Platelet	3.07014	2.31647	6201134671	0.735281	0	0	75.7057	41.1706
VCL	Platelet	1.90087	1.53687	6.18628e+09	0.73352	0	0	65.4005	25.2442
TUBA4A	Platelet	2.73891	2.065	6.15187e+09	0.72944	0	0	73.8474	39.8358
PGRMC1	Platelet	1.10191	0.970766	6.12954e+09	0.726792	0	0	54.2561	11.1459
RGS10	Platelet	3.23744	2.20338	6.10604e+09	0.724005	0	0	80.8501	50.9123
TLN1	Platelet	3.32251	2.2862	6.10418e+09	0.723785	0	0	80.0599	50.7261
PDLIM1	Platelet	1.24065	1.06182	6.06365e+09	0.718979	0	0	54.6812	12.8579
NCOA4	Platelet	2.31253	1.74498	6.01831e+09	0.713603	0	0	68.5232	34.6082
TSC22D1	Platelet	2.01041	1.90289	6.00668e+09	0.712223	0	0	48.5995	8.05523
ITGB3	Platelet	0.883978	0.853917	5970818861	0.707972	0	0	43.5804	2.24607
TMEM40	Platelet	1.337	1.30922	5.96884e+09	0.707737	0	0	43.1281	1.85595
PF4V1	Platelet	1.13466	1.07597	5.93204e+09	0.703374	0	0	44.1853	4.11269
CALM3	Platelet	2.69357	1.5233	5.91857e+09	0.701777	0	0	83.406	58.4327
SNCA	Platelet	1.00474	0.865157	5.91778e+09	0.701683	0	0	45.455	5.61181
PTCRA	Platelet	1.34191	1.3145	5.91079e+09	0.700853	0	0	41.6839	1.76979
LIMS1	Platelet	2.01924	1.5088	5907476721	0.700461	0	0	64.3924	30.6043
AP003068.2	Platelet	0.899128	0.857218	5.902e+09	0.699811	0	0	42.9319	3.47997
KIF2A	Platelet	2.08616	1.45051	5.89852e+09	0.699399	0	0	71.0627	40.9702
MPP1	Platelet	1.5667	1.31258	5.88761e+09	0.698106	0	0	53.3733	16.7484
PARVB	Platelet	1.38294	1.15412	5852040840	0.693888	0	0	52.267	16.563
HIST1H3H	Platelet	1.36234	1.285	5.8469e+09	0.693278	0	0	43.4605	5.72452
MAX	Platelet	2.01003	1.42691	5838568057	0.69229	0	0	68.8065	40.8521
OST4	Platelet	4.44496	2.21264	5.82799e+09	0.691036	0	0	92.4305	79.4022
MMD	Platelet	1.13559	1.06357	5.82663e+09	0.690875	0	0	43.2371	6.03762
RUFY1	Platelet	1.25635	1.11449	5.81144e+09	0.689074	0	0	47.3733	11.8072
RSU1	Platelet	1.48213	1.04493	5.80745e+09	0.688601	0	0	63.3188	32.5486
CCL5	Platelet	13.6894	3.96054	5801932123	0.687946	0	0	94.9264	56.5132
AP001189.1	Platelet	0.669864	0.635075	5.78533e+09	0.685978	0	0	39.8365	2.92688
ILK	Platelet	1.71722	1.2666	5762909862	0.68332	0	0	61.782	32.3515
TPM1	Platelet	0.882398	0.798438	5.74739e+09	0.681479	0	0	42.2943	6.96516
RNF11	Platelet	1.0436	0.802897	5.71122e+09	0.677191	0	0	51.7711	19.9584
PRKAR2B	Platelet	0.678856	0.628938	5.68372e+09	0.67393	0	0	38.4087	3.99672
MAP3K7CL	Platelet	0.998365	0.854808	5.67807e+09	0.67326	0	0	43.733	10.2991
ESAM	Platelet	0.831717	0.811775	5.65916e+09	0.671018	0	0	35.5913	1.55352
ACTN1	Platelet	1.09548	0.834729	5.64494e+09	0.669331	0	0	50.1308	18.6324
DMTN	Platelet	0.669755	0.629468	5.63859e+09	0.668579	0	0	36.3161	2.78937
CD9	Platelet	0.796076	0.735696	5.59433e+09	0.66333	0	0	36.6431	4.39685
C2orf88	Platelet	0.721744	0.690432	5.57212e+09	0.660698	0	0	34.4469	2.56048
FHL1	Platelet	0.629864	0.578941	5.5504e+09	0.658121	0	0	35.6022	4.43971
HIST1H2BJ	Platelet	0.835913	0.788866	5.54576e+09	0.657571	0	0	34.8229	3.7093
GMPR	Platelet	0.601853	0.558006	5.5449e+09	0.657469	0	0	34.4741	3.15316
SEPTIN5	Platelet	0.548447	0.535662	5.53517e+09	0.656316	0	0	32.2452	1.06266
TRIM58	Platelet	0.72267	0.672338	5.53303e+09	0.656063	0	0	33.7766	2.67318
SMIM3	Platelet	0.719019	0.638787	5.52042e+09	0.654567	0	0	37.1117	6.99475
NAP1L1	Platelet	2.56589	1.25578	5.49441e+09	0.651483	0	0	77.9346	57.8577
FERMT3	Platelet	1.94114	1.13968	5.46077e+09	0.647494	0	0	67.6894	46.8664
TIMP1	Platelet	2.12463	0.646231	5.44775e+09	0.645951	0	0	72.5831	44.8083
CLEC1B	Platelet	0.651826	0.635775	5.42617e+09	0.643391	0	0	29.8256	1.25348
CYB5R3	Platelet	0.986975	0.623496	5.4212e+09	0.642802	0	0	52.9864	28.3291
STOM	Platelet	1.12638	0.761358	5.40215e+09	0.640543	0	0	50.6594	25.6426
MGLL	Platelet	0.550082	0.501877	5.40105e+09	0.640414	0	0	31.4605	3.54655
OAZ1	Platelet	9.55019	2.52983	5.397e+09	0.639933	0	0	97.9891	91.9761
THBS1	Platelet	0.62654	0.558317	5.39097e+09	0.639217	0	0	31.4877	3.73323
PLA2G12A	Platelet	0.603106	0.520742	5384224136	0.638418	0	0	34.3651	7.41141
YWHAH	Platelet	0.906649	0.628939	5.38181e+09	0.638132	0	0	45.5695	19.9353
CD151	Platelet	0.794005	0.519581	5.34432e+09	0.633687	0	0	45.5368	20.4671
CA2	Platelet	0.625068	0.57811	5.28441e+09	0.626582	0	0	28.7575	3.66643
NT5C3A	Platelet	1.28207	0.932943	5267387073	0.624564	0	0	47.8692	27.1061
ARHGAP18	Platelet	0.648992	0.508296	5261297931	0.623842	0	0	35.455	11.647
WBP2	Platelet	0.986866	0.567332	5.24944e+09	0.622436	0	0	52.7248	32.1796
MFSD1	Platelet	0.873787	0.529041	5.24466e+09	0.62187	0	0	46.9482	24.6487
RAB27B	Platelet	0.617384	0.535187	5.20679e+09	0.617379	0	0	29.891	6.95667
TUBA1C	Platelet	0.922071	0.645079	5.20248e+09	0.616868	0	0	42.1962	21.2904
IL32	Treg	29.9216	22.1074	2.23998e+09	0.872382	0	0	99.9816	61.0011
CD27	Treg	2.1636	1.7791	2.08791e+09	0.813156	0	0	77.4752	18.1278
CD3D	Treg	4.1417	2.7051	2.05849e+09	0.801697	0	0	93.9455	38.043
LTB	Treg	8.92455	5.54539	2.05501e+09	0.800342	0	0	95.6386	43.9962
LDHB	Treg	5.73077	3.43001	2.05163e+09	0.799026	0	0	96.4851	62.7373
FOXP3	Treg	1.58649	1.57277	2030060107	0.790626	0	0	58.8149	0.865364
ISG20	Treg	3.19507	2.20237	2011812322	0.783519	0	0	87.5046	47.6278
CD3E	Treg	7.24696	4.18588	2.0105e+09	0.783008	0	0	98.8406	49.4711
TLE5	Treg	4.23537	2.64915	1.99512e+09	0.777017	0	0	93.6511	61.6643
LIME1	Treg	3.37431	2.20472	1.98525e+09	0.773175	0	0	88.94	44.8364
FCMR	Treg	2.4113	1.73594	1.98201e+09	0.771913	0	0	80.714	35.2486
CD3G	Treg	2.36529	1.47991	1.9603e+09	0.763457	0	0	85.2043	33.9255
PBXIP1	Treg	1.75837	1.3221	1.94314e+09	0.756775	0	0	72.6537	27.8565
TIGIT	Treg	1.61115	1.3518	1942877759	0.756672	0	0	64.0596	15.4079
SPOCK2	Treg	1.97534	1.35354	1.92353e+09	0.749138	0	0	76.9783	32.6398
AQP3	Treg	1.71163	1.35053	1.91456e+09	0.745644	0	0	63.6548	15.6546
SKAP1	Treg	2.98031	1.75091	1.91197e+09	0.744633	0	0	88.2959	50.6658
STAM	Treg	1.00147	0.894333	1.90997e+09	0.743855	0	0	56.2385	9.43435
LCK	Treg	2.94921	1.70864	1.90945e+09	0.743651	0	0	88.3327	48.858
ARID5B	Treg	1.63066	1.17779	1906391749	0.742462	0	0	71.3839	28.9629
HSPA8	Treg	9.09109	4.88903	1.8952e+09	0.738102	0	0	95.7306	79.4291
EVL	Treg	3.97019	2.09804	1.89174e+09	0.736756	0	0	93.5591	63.8824
CD52	Treg	12.4082	5.968	1.88609e+09	0.734554	0	0	99.1903	81.1958
RTKN2	Treg	1.13526	1.10758	1.88135e+09	0.732708	0	0	48.0493	1.76374
[truncated: 379 more rows]

## Sheet: supplementary file 1f
# Supplementary file 1f. GSEA results related to myeloid lineage, related to figure 3C.
pathway	pval	padj	log2err	ES	NES	size	cluster	group	time
EPITHELIAL MESENCHYMAL TRANSITION	0.0191895	0.119935	0.352488	-0.538394	-1.51282	24	CD14_Mono	Negative	Before
EPITHELIAL MESENCHYMAL TRANSITION	0.256536	0.557687	0.10592	-0.393291	-1.17013	23	CD16_Mono	Negative	Before
EPITHELIAL MESENCHYMAL TRANSITION	0.0756371	0.291285	0.287805	-0.402347	-1.40116	23	cDC	Negative	Before
HYPOXIA	0.00576797	0.0576797	0.407018	-0.542126	-1.64809	35	CD14_Mono	Negative	Before
HYPOXIA	0.113707	0.371901	0.16318	-0.391169	-1.301	41	CD16_Mono	Negative	Before
HYPOXIA	0.0184329	0.0921646	0.352488	-0.389676	-1.58373	43	cDC	Negative	Before
INTERFERON ALPHA RESPONSE	0.319366	0.508942	0.0728939	-0.379206	-1.12198	31	CD14_Mono	Negative	Before
INTERFERON ALPHA RESPONSE	0.00361952	0.0435547	0.431708	0.502155	1.81206	39	CD16_Mono	Negative	Before
INTERFERON ALPHA RESPONSE	0.592375	0.701425	0.0908241	-0.242498	-0.915443	31	cDC	Negative	Before
OXIDATIVE PHOSPHORYLATION	0.00180748	0.0451871	0.45506	-0.479823	-1.62339	76	CD14_Mono	Negative	Before
OXIDATIVE PHOSPHORYLATION	0.884393	0.948723	0.0363783	-0.20181	-0.761973	87	CD16_Mono	Negative	Before
OXIDATIVE PHOSPHORYLATION	0.0130049	0.0921646	0.38073	0.325108	1.44606	113	cDC	Negative	Before
P53 PATHWAY	0.0102506	0.0733017	0.38073	-0.527661	-1.59306	34	CD14_Mono	Negative	Before
P53 PATHWAY	0.00139545	0.0232574	0.45506	-0.561411	-1.83921	37	CD16_Mono	Negative	Before
P53 PATHWAY	0.00507611	0.0634514	0.407018	-0.438792	-1.71578	37	cDC	Negative	Before
TNFA SIGNALING VIA NFKB	1.98914e-08	9.94572e-07	0.733762	-0.659755	-2.14496	56	CD14_Mono	Negative	Before
TNFA SIGNALING VIA NFKB	0.0114996	0.0821401	0.38073	-0.444037	-1.58297	62	CD16_Mono	Negative	Before
TNFA SIGNALING VIA NFKB	4.58792e-09	2.29396e-07	0.761461	-0.596761	-2.58087	57	cDC	Negative	Before
UV RESPONSE UP	0.081448	0.266362	0.164406	-0.451033	-1.37116	35	CD14_Mono	Negative	Before
UV RESPONSE UP	0.710863	0.883213	0.0510114	-0.259924	-0.850265	38	CD16_Mono	Negative	Before
UV RESPONSE UP	0.264331	0.515464	0.152145	-0.284126	-1.111	37	cDC	Negative	Before
EPITHELIAL MESENCHYMAL TRANSITION	0.0604752	0.230558	0.271289	-0.483794	-1.46408	24	CD14_Mono	Negative	After
EPITHELIAL MESENCHYMAL TRANSITION	0.0831135	0.319667	0.176694	-0.520763	-1.39064	23	CD16_Mono	Negative	After
EPITHELIAL MESENCHYMAL TRANSITION	0.00044178	0.00736301	0.498493	-0.627232	-2.08259	22	cDC	Negative	After
HYPOXIA	0.00030609	0.00765226	0.498493	-0.605351	-1.95897	33	CD14_Mono	Negative	After
HYPOXIA	0.00435837	0.0446621	0.407018	-0.53469	-1.61702	45	CD16_Mono	Negative	After
HYPOXIA	0.00431722	0.0308373	0.407018	-0.460384	-1.7886	44	cDC	Negative	After
INTERFERON ALPHA RESPONSE	0.076779	0.230558	0.222056	0.432755	1.36887	31	CD14_Mono	Negative	After
INTERFERON ALPHA RESPONSE	0.699482	0.913679	0.115734	0.238257	0.881071	36	CD16_Mono	Negative	After
INTERFERON ALPHA RESPONSE	0.238325	0.425581	0.109684	0.355538	1.18657	30	cDC	Negative	After
OXIDATIVE PHOSPHORYLATION	1	1	0.0512184	-0.107058	-0.412621	82	CD14_Mono	Negative	After
OXIDATIVE PHOSPHORYLATION	0.277149	0.602499	0.0802023	-0.341573	-1.13084	82	CD16_Mono	Negative	After
OXIDATIVE PHOSPHORYLATION	1.01193e-06	2.52981e-05	0.643552	0.469812	1.99262	113	cDC	Negative	After
P53 PATHWAY	0.00177016	0.0295027	0.45506	-0.549587	-1.78408	34	CD14_Mono	Negative	After
P53 PATHWAY	0.00197021	0.0446621	0.431708	-0.586823	-1.70549	36	CD16_Mono	Negative	After
P53 PATHWAY	0.00090878	0.0113598	0.477271	-0.490665	-1.83268	37	cDC	Negative	After
TNFA SIGNALING VIA NFKB	8.05417e-15	4.02709e-13	0.986546	-0.778311	-2.82085	52	CD14_Mono	Negative	After
TNFA SIGNALING VIA NFKB	7.97407e-11	3.98704e-09	0.839089	-0.693531	-2.24819	70	CD16_Mono	Negative	After
TNFA SIGNALING VIA NFKB	4.01192e-16	2.00596e-14	1.0377	-0.7523	-3.06775	58	cDC	Negative	After
UV RESPONSE UP	0.0257086	0.128543	0.352488	-0.461006	-1.5258	36	CD14_Mono	Negative	After
UV RESPONSE UP	0.029476	0.210543	0.352488	-0.511593	-1.49574	37	CD16_Mono	Negative	After
UV RESPONSE UP	0.00307894	0.0293997	0.431708	-0.478416	-1.81813	39	cDC	Negative	After
EPITHELIAL MESENCHYMAL TRANSITION	0.000948575	0.00526986	0.477271	0.643327	1.65866	26	CD14_Mono	VAF>=0.1	Before
EPITHELIAL MESENCHYMAL TRANSITION	0.00657683	0.0350764	0.407018	0.600177	1.57281	23	CD16_Mono	VAF>=0.1	Before
EPITHELIAL MESENCHYMAL TRANSITION	0.00179747	0.00817034	0.45506	0.642683	1.6967	25	cDC	VAF>=0.1	Before
HYPOXIA	3.52197e-05	0.000440246	0.557332	0.635174	1.72531	44	CD14_Mono	VAF>=0.1	Before
HYPOXIA	1.29201e-06	3.10082e-05	0.643552	0.635756	1.81684	50	CD16_Mono	VAF>=0.1	Before
HYPOXIA	1.33268e-08	3.33171e-07	0.74774	0.715169	2.06473	46	cDC	VAF>=0.1	Before
INTERFERON ALPHA RESPONSE	1.51307e-05	0.000252179	0.593325	-0.520676	-2.58694	25	CD14_Mono	VAF>=0.1	Before
INTERFERON ALPHA RESPONSE	NA	NA	NA	NA	NA	NA	CD16_Mono	VAF>=0.1	Before
INTERFERON ALPHA RESPONSE	0.642857	0.73515	0.237794	-0.217706	-0.899132	28	cDC	VAF>=0.1	Before
OXIDATIVE PHOSPHORYLATION	0.952048	0.952048	0.0102389	0.26173	0.740307	85	CD14_Mono	VAF>=0.1	Before
OXIDATIVE PHOSPHORYLATION	0.758242	0.891759	0.025763	0.296252	0.885657	90	CD16_Mono	VAF>=0.1	Before
OXIDATIVE PHOSPHORYLATION	1	1	0.00288973	0.139483	0.424448	107	cDC	VAF>=0.1	Before
P53 PATHWAY	0.000303948	0.00217106	0.498493	0.614224	1.65603	39	CD14_Mono	VAF>=0.1	Before
P53 PATHWAY	0.00646458	0.0350764	0.407018	0.532659	1.49657	42	CD16_Mono	VAF>=0.1	Before
P53 PATHWAY	2.66837e-05	0.000333547	0.57561	0.647482	1.85171	43	cDC	VAF>=0.1	Before
TNFA SIGNALING VIA NFKB	6.71648e-19	3.35824e-17	1.12391	0.77011	2.16406	74	CD14_Mono	VAF>=0.1	Before
TNFA SIGNALING VIA NFKB	6.2014e-09	2.97667e-07	0.761461	0.616332	1.83098	81	CD16_Mono	VAF>=0.1	Before
TNFA SIGNALING VIA NFKB	1.98591e-21	9.92955e-20	1.19534	0.790346	2.36037	76	cDC	VAF>=0.1	Before
UV RESPONSE UP	0.000785436	0.00490898	0.477271	0.595667	1.60599	39	CD14_Mono	VAF>=0.1	Before
UV RESPONSE UP	3.7549e-05	0.000600784	0.557332	0.613414	1.72236	41	CD16_Mono	VAF>=0.1	Before
UV RESPONSE UP	0.000259231	0.0016202	0.498493	0.632468	1.76301	36	cDC	VAF>=0.1	Before
EPITHELIAL MESENCHYMAL TRANSITION	0.00139742	0.00776343	0.45506	0.644695	1.64129	25	CD14_Mono	VAF>=0.1	After
EPITHELIAL MESENCHYMAL TRANSITION	0.159794	0.495745	0.10673	0.503915	1.24021	23	CD16_Mono	VAF>=0.1	After
EPITHELIAL MESENCHYMAL TRANSITION	0.0165907	0.0592525	0.352488	0.576958	1.56558	21	cDC	VAF>=0.1	After
HYPOXIA	0.000239713	0.00199761	0.518848	0.618084	1.66615	41	CD14_Mono	VAF>=0.1	After
HYPOXIA	0.0124171	0.155214	0.38073	0.528792	1.39151	46	CD16_Mono	VAF>=0.1	After
HYPOXIA	0.000831974	0.00507792	0.477271	0.564241	1.75772	47	cDC	VAF>=0.1	After
INTERFERON ALPHA RESPONSE	0.229897	0.359214	0.0852885	0.448818	1.17528	30	CD14_Mono	VAF>=0.1	After
INTERFERON ALPHA RESPONSE	0.218402	0.546958	0.0870516	0.450235	1.16224	36	CD16_Mono	VAF>=0.1	After
INTERFERON ALPHA RESPONSE	0.0129098	0.0496532	0.38073	0.534634	1.57433	33	cDC	VAF>=0.1	After
OXIDATIVE PHOSPHORYLATION	0.937876	0.976954	0.0120227	0.253727	0.727082	83	CD14_Mono	VAF>=0.1	After
OXIDATIVE PHOSPHORYLATION	0.084	0.387841	0.151149	0.44717	1.21947	87	CD16_Mono	VAF>=0.1	After
OXIDATIVE PHOSPHORYLATION	1.96806e-07	3.2801e-06	0.690132	-0.431339	-2.01678	100	cDC	VAF>=0.1	After
P53 PATHWAY	0.0582822	0.153374	0.186433	0.497621	1.33256	37	CD14_Mono	VAF>=0.1	After
P53 PATHWAY	0.0010351	0.0258776	0.45506	0.602363	1.55955	38	CD16_Mono	VAF>=0.1	After
P53 PATHWAY	0.000215428	0.00179523	0.518848	0.599467	1.82025	40	cDC	VAF>=0.1	After
TNFA SIGNALING VIA NFKB	2.549e-12	1.2745e-10	0.898671	0.709499	2.02331	73	CD14_Mono	VAF>=0.1	After
TNFA SIGNALING VIA NFKB	0.000802201	0.0258776	0.477271	0.541504	1.46443	75	CD16_Mono	VAF>=0.1	After
TNFA SIGNALING VIA NFKB	3.46516e-17	1.73258e-15	1.06721	0.770506	2.54454	72	cDC	VAF>=0.1	After
UV RESPONSE UP	0.0480082	0.150026	0.206588	0.498061	1.33916	39	CD14_Mono	VAF>=0.1	After
UV RESPONSE UP	0.298583	0.668073	0.0706196	0.430708	1.11512	38	CD16_Mono	VAF>=0.1	After
UV RESPONSE UP	0.000954769	0.00507792	0.477271	0.579335	1.73896	38	cDC	VAF>=0.1	After

## Sheet: supplementary file 1g
# Supplementary file 1g. Identified DEGs from each cluster by VAF bin
cluster	gene_name	vaf_bin	time	avgExpr	avg_log2FC	statistic	auc	pval	p_val_adj	pct_in	pct_out
CD8_TEM	ZFP36	VAF>=0.1	After	2.043106070260375	0.8948572348287351	2.48545e+07	0.7614461701445843	0	0	95.0045	77.58339006126617
CD14_Mono	NFKBIA	VAF>=0.1	Before	2.122635348432744	0.7695656582014831	121621657.60351562	0.722642	0	0	95.31450577663672	81.4634
CD14_Mono	ZFP36	VAF>=0.1	Before	2.2036118570416234	0.6732524497210162	123691995.53710938	0.7349433897558576	0	0	98.3633	89.99851884766348
CD14_Mono	NFKBIA	VAF>=0.1	After	1.9223943789041658	0.5854529951078709	221625357.46166992	0.6765527104996835	0	0	91.92853724676982	82.0397
NK_CD56low	TSC22D3	VAF>=0.1	After	1.750637489035844	0.5839012260320988	203009559.75439453	0.6853153773936923	0	0	92.3303	77.68006863471513
CD14_Mono	TMEM176B	VAF>=0.1	After	1.2063599260772444	0.5523815647845899	232452641.60107422	0.7096050133397639	0	0	84.25586217897592	53.695410877636164
NK_CD56low	ZFP36	VAF>=0.1	After	1.7997488560997261	0.5510707398011119	196350107.01220703	0.6628345376993986	0	0	91.82825484764543	79.7879
CD14_Mono	FOS	VAF>=0.1	Before	3.2065320958187002	0.5450974990912258	118645451.97363281	0.7049582333438621	0	0	99.29396662387676	98.55772791231578
CD14_Mono	PLAUR	VAF>=0.1	After	1.2452791323909767	0.5294564584225044	220932692.37939453	0.674438	0	0	78.0188	59.495923757032955
NK_CD56low	DUSP2	VAF>=0.1	After	1.1169545978703488	0.5216718167549201	193857901.8623047	0.6544214042739868	0	0	67.29570637119113	45.041531802051246
NK_CD56low	CD8A	VAF>=0.1	After	0.7280694957155299	0.5072109345115079	197560227.1640625	0.6669196357093833	0	0	50.06925207756233	20.793198923682876
NK_CD56low	EIF1	VAF>=0.1	Before	2.5420524074022928	0.4815742366072109	93985566.89111328	0.7430131835928159	0	0	99.96674426338544	99.28208054010365
CD14_Mono	IL1B	VAF>=0.1	After	0.9028278701467185	0.46891898392844256	210385393.55566406	0.6422406257562124	0	0	56.292869676184395	30.474222069123897
CD14_Mono	CCL3	VAF>=0.1	After	0.7918844560794491	0.453102	201963139.81689453	0.6165301264670411	0	0	45.12681448396874	24.727293604317374
NK_CD56low	TNFAIP3	VAF>=0.1	After	0.9881574535757132	0.4411569879745678	192321323.68554688	0.649234	0	0	67.38227146814404	44.54237023749171
NK_CD56low	CD3D	VAF>=0.1	After	0.6934081118778086	0.43152142947847183	1.86289e+08	0.6288711760797604	0	0	42.86703601108034	19.55699411145342
NK_CD56low	CXCR4	VAF>=0.1	After	0.9028689257242953	0.43097707190506357	192051263.02539062	0.6483225911056228	0	0	63.27908587257618	38.52708341457708
NK_CD56low	HLA-DRB5	VAF>=0.1	After	1.0240507520310391	0.4284938492393855	191022097.91845703	0.6448483573083973	0	0	69.87534626038781	51.780212923604886
CD14_Mono	TMEM176A	VAF>=0.1	After	0.883317	0.4248233517224377	222671757.2788086	0.6797470409709788	0	0	73.05790397192534	42.68764113752057
CD14_Mono	CCL3L1	VAF>=0.1	After	0.6561217906699556	0.42134261255303185	2.0609e+08	0.6291279486058025	0	0	43.340245653214225	19.694186091016956
CD14_Mono	SOD2	VAF>=0.1	After	1.1948761618212962	0.40361993898308046	214916977.10351562	0.6560741291389875	0	0	81.71957249960121	66.98817315420828
CD14_Mono	CXCL8	VAF>=0.1	After	0.6643934172388631	0.39731511335384156	205891502	0.6285221842046765	0	0	44.07401499441697	19.466452329008305
NK_CD56low	GZMH	VAF>=0.1	After	2.233967982937766	0.39324454057157165	195690412.6220703	0.6606075553322234	0	0	97.55886426592798	92.36633779199002
CD14_Mono	BCL2A1	VAF>=0.1	After	0.8374021010354045	0.39302228215820295	216916824.55810547	0.6621790362285233	0	0	67.8418	44.863551115704055
CD14_Mono	RPS26	VAF>=0.1	After	2.135272727102211	0.37421860711066257	218789890.04101562	0.6678969177197034	0	0	99.47360025522411	97.06242584299767
NK_CD56low	CD8B	VAF>=0.1	After	0.4549670643176435	0.3714114286045175	1.86746e+08	0.6304146564353742	0	0	33.01592797783934	7.861794641812581
NK_CD56low	PPP1R15A	VAF>=0.1	After	0.8447945041744429	0.366151	189932681.1533203	0.6411707272379615	0	0	64.94113573407202	41.87107592715361
NK_CD56low	HSPA8	VAF>=0.1	After	1.8227448279284477	0.3574237793607673	193603015.4013672	0.6535609639509732	0	0	98.64958448753463	91.72678703739811
CD14_Mono	G0S2	VAF>=0.1	After	0.47930238663947067	0.35640017720356026	201763905	0.6159219250548033	0	0	32.54107513159993	10.114058253913576
CD14_Mono	CCL4L2	VAF>=0.1	Before	0.4458180435812936	0.35371553459363814	100805919	0.5989606966530615	0	0	26.82926829268293	7.803821373028216
NK_CD56low	SRSF7	VAF>=0.1	After	1.0074591291963453	0.3521499095223781	192802925.8466797	0.6508600385571998	0	0	80.22853185595568	61.52166283196194
NK_CD56low	EEF2	VAF>=0.1	After	1.5691105349770913	0.34660508120037137	195424040.8984375	0.659708	0	0	97.64542936288089	88.25605428382015
NK_CD56low	MYADM	VAF>=0.1	After	0.6214982608074149	0.3264339324132706	191260606.45996094	0.6456535093974423	0	0	56.492382271468145	30.214873454743984
CD14_Mono	VIM	VAF>=0.1	After	3.0332923169072057	0.3222337031733007	217385978.9765625	0.6636112175325282	0	0	99.984048492582545	99.8622
NK_CD56low	DNAJB1	VAF>=0.1	After	0.6262085048570656	0.32122210501032256	188943943.09326172	0.6378329662103905	0	0	56.146121883656505	33.685606208321964
CD14_Mono	SRGN	VAF>=0.1	After	2.157016772199467	0.3126034525464547	218216928.2133789	0.6661478449514057	0	0	99.72882437390334	98.16282007119072
NK_CD56low	RPL3	VAF>=0.1	After	2.465565418024029	0.29808996752807637	194319158.7158203	0.655979	0	0	99.96537396121884	99.57688258004134
CD14_Mono	H3F3B	VAF>=0.1	After	2.236287195448717	0.27658036131310415	211218191.93652344	0.6447828980319271	0	0	99.92024246291274	99.28426531940138
NK_CD56low	RPS18	VAF>=0.1	After	2.624614970372888	0.27630680148480735	192831942.59179688	0.6509579926715516	0	0	100	99.84401201107515
CD8_TEM	TRAV24	VAF>=0.1	Before	0.2794026858255418	0.27142423089654305	6658391	0.6272403591244171	0	0	26.126126126126124	0.644122
CD14_Mono	B2M	VAF>=0.1	After	3.813017149436956	0.2712173392709203	213459785.01953125	0.6516257787091012	0	0	100	100
CD14_Mono	CLU	VAF>=0.1	After	0.47012482810816825	0.26533006288188277	205900932.98901367	0.6285509740564019	0	0	45.90843834742383	21.007004248478587
CD14_Mono	DUSP2	VAF>=0.1	After	0.4607471573149153	0.25423136573776384	199594582.16503906	0.6092996627796233	0	0	40.89966501834424	20.126688865924137
NK_CD56low	TYROBP	VAF>=0.1	After	1.2730818540941704	-0.704612	91805914.15136719	0.30991646294752967	0	0	68.00554016620498	96.28358616386538
CD8_TEM	CXCR4	VAF>=0.1	After	1.5205097046076583	0.7671212753666934	2.40562e+07	0.7369900383503293	5.556840537701351e-308	4.163462772872737e-304	85.95859585958596	54.70388019060586
NK_CD56low	KLF6	VAF>=0.1	After	1.3941398758362682	0.40748779602308594	191754806.0234375	0.647322	4.932592693380308e-305	2.173967691479527e-302	88.64265927977839	73.62243107280739
NK_CD56low	DUSP1	VAF>=0.1	After	1.6189133607029742	0.5430887467933028	191264409.53320312	0.6456663477316438	2.6959831314094625e-303	1.1542659206905942e-300	83.65650969529086	63.453964044768554
NK_CD56low	RPS26	VAF>=0.1	After	2.1061392172026125	0.369818	192069321.56396484	0.6483835527381349	1.8688213707842696e-302	7.778968955889522e-300	98.9612	95.9755
NK_CD56low	EIF1	VAF>=0.1	After	2.298533538457345	0.2786687113145039	191987592.24121094	0.6481076526192686	8.151609287718212e-301	3.301401761525876e-298	99.93074792243767	99.39944624263933
NK_CD56low	JUN	VAF>=0.1	Before	1.9124709891703227	0.8248943752824756	88353299.20288086	0.6984866750627469	1.0095281499589124e-301	5.042593109044767e-298	87.62886597938144	67.3822
CD14_Mono	NAMPT	VAF>=0.1	After	1.4948984429321512	0.4025670152621563	209968144.41601562	0.6409668949899501	2.2378475103364502e-299	1.5968640448757954e-296	87.82899984048493	73.43361273778083
CD14_Mono	LILRB2	VAF>=0.1	After	0.9029261472626561	0.30113305708299243	208212930.66015625	0.6356087778609643	3.212557409578546e-295	2.0058405326056044e-292	75.33896953262084	60.61928273433613
NK_CD56low	FOS	VAF>=0.1	Before	2.2884324905406284	0.9395873572424722	8.80261e+07	0.6959000888675485	1.330269778676717e-295	4.983523158367651e-292	89.75723312271367	63.82826986164598
NK_CD56low	NR4A2	VAF>=0.1	After	0.7749321142902855	0.3423298318190284	185886069.51635742	0.6275102612751466	2.9969316086119767e-294	1.1818163198697493e-291	58.46606648199446	35.20843895020083
CD14_Mono	SERPINB1	VAF>=0.1	After	1.3399438827620125	0.30370051583995883	209381670.03466797	0.6391765726329608	5.546847187126304e-293	3.3247802039635063e-290	91.06715584622746	82.07027213227695
CD14_Mono	SERPINA1	VAF>=0.1	After	1.7563148969814135	0.32467387684613036	209650386.5234375	0.6399968797986895	1.9287657526704816e-291	1.0834089890370293e-288	95.91641410113255	89.66394917135531
CD14_Mono	FOSB	VAF>=0.1	After	1.488354569686651	0.4298350922467038	209044966.0576172	0.6381487209876493	1.306820086099166e-289	6.993821067927144e-287	84.46323177540278	69.18130669422436
NK_CD56low	H3F3B	VAF>=0.1	Before	2.388086256541762	0.391031	88117852.45605469	0.6966253250415403	1.1317131636605683e-286	3.3917443514907233e-283	99.86697705354175	99.13469310131697
NK_CD56low	IL32	VAF>=0.1	After	2.5122865995015973	0.5105600072838672	190632176.14746094	0.6435320676421988	1.9715834175766494e-282	7.205896954240511e-280	90.7202	83.4009
NK_CD56low	PPP1R15A	VAF>=0.1	Before	1.0212713705204741	0.500996	85942817.78466797	0.6794303504399176	1.007239024516313e-281	2.5155794637294917e-278	73.36215497173264	45.0221
CD14_Mono	VIM	VAF>=0.1	Before	3.1123617619224073	0.39166195767266565	116131901.17089844	0.6900234144878519	6.9038333888543195e-280	1.4779134761711712e-276	100	99.82966748130046
CD14_Mono	SOCS3	VAF>=0.1	Before	0.5769080625317822	0.3392650268117771	109280857.15136719	0.6493164189121334	4.088843038865415e-279	7.65891411717478e-276	52.66367137355584	26.36451159001703
CD8_TEM	DUSP1	VAF>=0.1	After	1.9352026622546108	0.8677363994531109	2.37242e+07	0.7268179183473147	5.281766395036402e-272	2.638242314320683e-268	90.05400540054005	63.26752893124574
CD14_Mono	KLF6	VAF>=0.1	After	1.6243793220282399	0.3557734442458287	207798019.43798828	0.6343421840235555	1.982151619964894e-269	9.282044382866855e-267	94.1139	85.13223868029242
CD8_TEM	TSC22D3	VAF>=0.1	After	2.0580348295370072	0.7123688300449058	2.38011e+07	0.7291731947190635	2.610198563268098e-269	9.778456367643112e-266	96.48964896489649	83.15861130020423
CD14_Mono	PPP1R15A	VAF>=0.1	After	0.96606	0.30767215501867573	206182798.97021484	0.6294114224985992	1.9114001885621294e-266	8.679494492607123e-264	76.75865369277398	60.22314081218663
NK_CD56low	HLA-DPB1	VAF>=0.1	After	1.2583807185514537	0.31560270885309316	188788937.23339844	0.6373097007076282	5.414621053733911e-266	1.886932476516341e-263	88.52146814404432	77.80290917599345
NK_CD56low	FCER1G	VAF>=0.1	After	0.5747598641307103	-0.434753	108215072.5180664	0.3653101526456519	2.1149349569398157e-264	7.202795529487077e-262	39.12742382271468	63.25312950902781
CD14_Mono	DUSP1	VAF>=0.1	Before	2.3481635814138375	0.47672556998285853	115204820.37695312	0.6845149585985191	9.908630499777884e-265	1.6497869782130177e-261	98.58793324775354	95.02332814930016
NK_CD56low	TUBA4A	VAF>=0.1	After	0.6010155988988601	0.2736898865341695	183829112.8251953	0.6205664303895879	8.64198131898337e-264	2.815219349238387e-261	55.88642659279779	36.33935186990602
CD8_TEM	NR4A2	VAF>=0.1	After	0.9129588553039738	0.5186373041198107	22894402	0.7013962730514032	3.427174078728296e-264	1.0271240713948704e-260	70.43204320432042	35.38461538461539
NK_CD56low	ZFP36	VAF>=0.1	Before	2.0181166585733057	0.6980087667518706	86935746.86669922	0.68728	8.537335179818308e-263	1.8275995381368195e-259	94.24675756568008	80.0575
CD14_Mono	ACTB	VAF>=0.1	Before	4.165528188761778	0.29583541368892563	115084764.7109375	0.6838016212660767	9.405570182840058e-262	1.4094246918985827e-258	100	100
NK_CD56low	DUSP1	VAF>=0.1	Before	1.9584361359721292	0.7358936401318277	86563361.20605469	0.6843361243617402	1.4637368150757655e-259	2.741762021738793e-256	91.25374127036913	67.23006703751247
CD8_TEM	MYADM	VAF>=0.1	After	0.8952888376929005	0.48575353227141904	2.30166e+07	0.7051395353966983	2.450618373515422e-259	6.120419387854766e-256	73.8074	40.84411164057182
NK_CD56low	FOSB	VAF>=0.1	Before	0.6465981411228093	0.3546236291408599	82589663.841796875	0.6529216250198124	4.089622208120644e-258	6.8092209765208725e-255	57.00033255736614	29.273047116436075
NK_CD56low	RPS19	VAF>=0.1	After	2.918282933650611	0.25870655142335197	188669676.62402344	0.6369071032653161	2.6731881658692423e-256	8.34535930532304e-254	100	99.96490270249191
NK_CD56low	COTL1	VAF>=0.1	After	0.6052153861291307	0.29852739786705274	182049617.17822266	0.6145592466276464	3.2276568817811165e-255	9.483615367350986e-253	50.25969529085873	31.899543735132397
CD8_TEM	PPP1R15A	VAF>=0.1	After	1.0178395489421117	0.5190851803034455	2.31043e+07	0.7078275203286156	2.3636794565157104e-255	5.05996237941256e-252	78.12781278127812	44.58815520762423
CD16_Mono	ZFP36	VAF>=0.1	Before	2.411425876748831	0.8370206907389754	13590455	0.7914315235781337	1.221814196067471e-254	1.8308885728071053e-250	99.18896999188969	90.71587563725139
CD8_TEM	DUSP2	VAF>=0.1	After	1.4657090054946746	0.708766	23315061	0.7142836441574723	2.8074057202805307e-250	5.258621839800469e-247	83.03330333033303	57.263444520081684
CD16_Mono	DUSP1	VAF>=0.1	Before	2.6643214676016975	0.7550582555162617	13530931	0.7879651812070015	6.300865110732929e-248	3.147282122811098e-244	99.10786699107868	95.97903353198822
NK_CD56low	HSP90AA1	VAF>=0.1	After	1.4541578269258844	0.2964028939124199	187461875.94628906	0.6328298352870037	1.8094145554771337e-246	5.115863606382047e-244	95.49861495844875	86.48754045938463
CD14_Mono	GLUL	VAF>=0.1	After	0.7792124487644092	0.270212	203496721.8046875	0.6212116713159614	7.742070640072107e-246	3.2226369039300145e-243	68.38411229861222	52.47062425842998
NK_CD56low	CD69	VAF>=0.1	After	1.1662449695055814	0.3722834013204338	186461104.99023438	0.6294514538636706	1.1685444423141537e-245	3.242710827421776e-243	77.40650969529086	59.536715672893195
CD8_TEM	JUNB	VAF>=0.1	After	2.0054384502035836	0.6863537304599152	2.34651e+07	0.7188803989316562	2.8627792738115505e-246	4.766527490896232e-243	95.27452745274528	84.67665078284547
CD14_Mono	JUNB	VAF>=0.1	Before	1.978306818952159	0.43448632039857604	113875328.4272461	0.6766154876915462	7.391394458642334e-244	1.0069095087523216e-240	97.78562259306803	92.58127823446641
CD14_Mono	PLAC8	VAF>=0.1	After	0.7296607322157355	0.26854763100815665	202277850.2763672	0.6174908388007624	1.942010443547772e-242	7.658164867516675e-240	64.14101132557026	44.94392773758947
CD14_Mono	NFKBIZ	VAF>=0.1	Before	0.9452253091782797	0.42860524769152875	111756343.95507812	0.6640250720866179	5.013257293335698e-242	6.2603050450529536e-239	71.21309370988446	48.89469006887359
NK_CD56low	CD3E	VAF>=0.1	After	1.3062104698509351	0.42630098405948313	185767702.64013672	0.6271106808783109	1.713295181215999e-240	4.504162857986271e-238	73.80540166204986	55.018913543657135
NK_CD56low	JUNB	VAF>=0.1	After	1.658255274402861	0.3900137767836651	186872216.02539062	0.6308392737995873	1.3632108737673915e-237	3.4623245666787055e-235	92.41689750692521	83.75190110361503
CD14_Mono	NAMPT	VAF>=0.1	Before	1.6310117500973706	0.5284597095402268	113273265.39550781	0.6730381968291017	3.1950858026644354e-238	3.682950827148197e-235	91.20667522464699	72.85788343331112
CD16_Mono	FOS	VAF>=0.1	Before	3.1149174767477543	0.9101537710013283	13432415	0.7822281644568763	9.523769406573169e-238	3.567842113937473e-234	99.67558799675588	92.99202987003662
NK_CD56low	NR4A2	VAF>=0.1	Before	1.0118755413231244	0.5076111895841434	83559476.53393555	0.6605885853809657	1.1242584175762764e-235	1.68470123873805e-232	65.21449950116394	41.14249037227214
NK_CD56low	UBC	VAF>=0.1	Before	2.254800381822903	0.3458791474828593	85697681.88378906	0.6774924017510946	3.816866762810082e-234	5.199613494609917e-231	99.86697705354175	98.31217610421719
CD14_Mono	CCL4	VAF>=0.1	Before	0.5527501266599745	0.4258347612569334	1.00162e+08	0.595137	7.745183298657229e-232	7.737438115358572e-229	28.11296534017972	10.364363474783381
CD8_TEM	FOS	VAF>=0.1	After	2.0642661544161296	0.9292234025319992	23095517	0.7075576618247257	5.4737271718913365e-232	8.202380167079167e-229	87.17371737173717	58.33219877467665
NK_CD56low	LY6E	VAF>=0.1	After	1.4274078317408312	0.3056387215200238	186178973.93847656	0.6284990418272927	1.8827346423887294e-230	4.625045674786084e-228	93.40373961218836	82.7165
NK_CD56low	YPEL5	VAF>=0.1	After	0.6373238151041469	0.25630046082553193	182251656.63085938	0.6152412871379537	1.987331495551612e-230	4.8032520098130496e-228	58.708448753462605	39.68334438248255
CD14_Mono	MYADM	VAF>=0.1	After	0.9488881241727448	0.2715742263205685	203187448.6044922	0.6202675572295883	3.892659511259444e-229	1.38884530419578e-226	77.76359866007337	61.599112029701075
CD14_Mono	PPP1R15A	VAF>=0.1	Before	1.090207458513489	0.4081020370974754	112004477.9428711	0.6654994151377612	8.054650039662712e-229	7.543683177771609e-226	80.13478818998716	62.158409242390576
CD8_TEM	EIF1	VAF>=0.1	After	2.399427656054703	0.3669720739120552	2.32272e+07	0.7115922126589787	8.54721812580894e-229	1.1643642146840633e-225	99.86498649864987	99.46221919673248
CD14_Mono	ATP2B1	VAF>=0.1	After	0.931863	0.28016452198779207	202772482.9663086	0.6190007972771496	3.3910730067629756e-226	1.1046788914422433e-223	74.78066677301005	59.98583840471543
CD4_TCM	EIF1	VAF>=0.1	Before	2.5909891280877018	0.4636963174281008	23778856.978515625	0.7477945440613242	6.138715826811449e-227	9.198865666476957e-223	100	99.72261401034321
NK_CD56low	BHLHE40	VAF>=0.1	After	0.6076877659307947	0.25189977612075015	181036996.33691406	0.6111408626123435	1.8138770084755756e-223	4.247022964376016e-221	55.384349030470915	36.36275006824474
CD8_TEM	TNFAIP3	VAF>=0.1	After	1.2763322788727132	0.603996	2.28221e+07	0.6991805596488853	6.215186531928479e-222	7.761214181745688e-219	79.47794779477948	52.654867256637175
CD14_Mono	FOSB	VAF>=0.1	Before	1.731642928172957	0.5186394303969415	112318922.50683594	0.667368	2.714776495892146e-221	2.3929956347614006e-218	88.86392811296534	76.89957787158409
NK_CD56low	NFKBIA	VAF>=0.1	Before	1.3428116384212445	0.5681599875192207	84226911.31347656	0.6658650640658458	1.4302330963428725e-220	1.7860035790581621e-217	79.9468	57.83530642323967
NK_CD56low	HLA-DPA1	VAF>=0.1	After	1.2194611994999842	0.2941177596969696	184931221.40039062	0.6242869052039394	1.0456719627821121e-218	2.4106760557369155e-216	85.28393351800554	76.98397223413798
CD14_Mono	ZFP36	VAF>=0.1	After	1.872817674291293	0.35201678319157037	203428097.77246094	0.6210021836673456	1.3314752452216015e-217	3.836953182624173e-215	96.45876535332589	89.77303172962834
CD8_TEM	RGS1	VAF>=0.1	After	0.4078902066690989	0.2932495550899335	20535847	0.6291392345497313	3.51042933582607e-215	4.0464448921041276e-212	37.03870387038704	12.137508509189924
CD14_Mono	RPS2	VAF>=0.1	After	1.6185085883308437	-0.252251	124804363.31542969	0.38098858023430165	2.57949266299813e-210	7.027945010004905e-208	97.38395278353804	98.53599724423012
CD8_TEM	BTG2	VAF>=0.1	After	0.796539	0.42373653055235333	22169805	0.6791974125935398	8.559559386675739e-210	9.161785529238282e-207	66.92169216921691	36.11980939414568
CD4_TCM	NR4A2	VAF>=0.1	Before	0.8772530511804342	0.5536387653586192	22239199	0.6993755709754974	1.2542832019765028e-210	9.397716890808947e-207	63.61204013377927	30.789844851904093
NK_CD56low	FOS	VAF>=0.1	After	1.697656406616184	0.5220137495690174	183537514.11450195	0.6195820576304524	9.969344642651149e-209	2.0464469790428419e-206	77.82202216066482	58.93811176539406
NK_CD56low	DDX5	VAF>=0.1	After	1.6938982651200336	0.28283512730598814	184470096.18432617	0.6227302484541032	1.2416266741761732e-208	2.5142940152067507e-206	98.16481994459834	90.74406270717155
CD14_Mono	IFI6	VAF>=0.1	After	0.7599974328468502	0.27006160321620476	1.99327e+08	0.6084826541712093	9.098074256152513e-207	2.3107566564143288e-204	62.322539479980854	44.93627282121943
CD4_TCM	PPP1R15A	VAF>=0.1	Before	1.3207562327392401	0.652902	23094781	0.7262818075610128	4.375640363030228e-207	2.185632361333599e-203	83.01003344481606	55.22802068641279
CD14_Mono	MAP3K8	VAF>=0.1	Before	0.6912644566948455	0.325012	108106032.72753906	0.6423359393696463	3.1028709653369065e-206	2.214120067408264e-203	61.23234916559692	37.75642449825965
CD8_TEM	SRSF7	VAF>=0.1	After	1.2312681697403016	0.4578575684957633	2.27347e+07	0.6965039962556501	3.388434441415497e-206	3.3850460069740814e-203	88.43384338433843	69.61878829135466
CD14_Mono	ID2	VAF>=0.1	After	0.7884717156489129	0.27162451021778333	199119254.23242188	0.6078486356730162	2.270265139060203e-203	5.577036575215925e-201	62.88084223959164	45.18123014506067
CD14_Mono	SRGN	VAF>=0.1	Before	2.1645865773023694	0.2954326575196027	111204670.00830078	0.6607471791338528	3.806541156186226e-202	2.592773601156845e-199	99.64698331193838	98.67066577797526
CD14_Mono	MTRNR2L12	VAF>=0.1	Before	1.855543522119303	0.49968411471480567	111139638.32617188	0.660361	4.013607339366408e-202	2.6149524339306795e-199	97.52888318356868	83.1167
NK_CD56low	SUB1	VAF>=0.1	After	1.1496900203933746	0.25073173437074336	183294974.19873047	0.6187632965134338	4.56300103720495e-201	8.766226992630278e-199	87.9675	78.52825332449402
NK_CD56low	HLA-DRA	VAF>=0.1	After	0.8266073007995035	0.3373539558204621	180784587.29296875	0.6102887855012052	1.4207411256373385e-200	2.694912122490572e-198	59.15858725761773	44.074406270717155
NK_CD56low	NFKBIA	VAF>=0.1	After	1.0557407830345424	0.3578990718554893	182166275.14794922	0.6149530581340891	2.2424985335117496e-200	4.1486222869967365e-198	70.44667590027701	53.97184416799906
CD8_TEM	SERTAD1	VAF>=0.1	After	0.538957	0.32360453583724413	2.14644e+07	0.6575866895743352	2.3250547482500874e-200	2.1775590876579726e-197	53.55535553555355	24.894486044928524
CD8_TEM	RGCC	VAF>=0.1	After	0.5375539727068994	0.35643325657852126	2.09763e+07	0.6426316542477938	8.616106046217102e-200	7.594844064856663e-197	44.86948694869487	18.168822328114366
CD14_Mono	BCL2A1	VAF>=0.1	Before	0.8068640507124408	0.34165966713037216	108788164.14257812	0.6463889742669396	6.570074962641092e-199	4.102190554799032e-196	68.51732991014121	45.62319484558987
NK_CD56low	DDX5	VAF>=0.1	Before	1.824809004086439	0.36331624947188423	83829428.98535156	0.6627227240256542	3.676740309264408e-198	4.238150271871319e-195	98.437	92.4832
CD8_TEM	NFKBIA	VAF>=0.1	After	1.2172387804862799	0.5658504383824056	22401375	0.6862918252342594	9.369421612135058e-195	7.800043492102435e-192	78.08280828082809	53.1858
CD8_TEM	YPEL5	VAF>=0.1	After	0.7758374767373669	0.3849351848903618	2.20852e+07	0.6766043537641715	4.0508889480439545e-193	3.194872151917824e-190	69.93699369936994	42.04220558202859
NK_CD56low	RPL41	VAF>=0.1	After	3.532327362417278	0.28020653089104064	182953631.5888672	0.6176109993517532	1.7398785383622808e-189	2.9967907927998595e-187	100	99.74456966813555
NK_CD56low	CD74	VAF>=0.1	After	2.3138795928175693	0.33642998783368894	182871759.23046875	0.6173346163761839	3.0401082163700893e-189	5.11865411486582e-187	98.18213296398892	97.47494442927895
NK_CD56low	TSC22D3	VAF>=0.1	Before	1.8109972041022402	0.48923384849473983	83287275.44238281	0.6584366698656147	2.5041025969753178e-188	2.5015984943783426e-185	95.51047555703359	82.34441116340989
NK_CD56low	MALAT1	VAF>=0.1	After	3.9778553036431954	-0.302429	1.13486e+08	0.38310461542695284	3.844932509930992e-187	6.401812629035101e-185	99.96537396121884	100
CD4_TCM	FOS	VAF>=0.1	Before	2.7438444423456634	1.044075531844437	23011672	0.7236682060401936	3.572432648645494e-187	1.0706580647990545e-183	93.84615384615384	74.75317348377996
CD8_TEM	FOS	VAF>=0.1	Before	2.6645146401702875	1.45059	8.5173e+06	0.8023552914857263	1.9034165214047747e-187	1.4261348286625275e-183	95.10939510939511	60.759771629336846
CD8_TEM	RPS26	VAF>=0.1	After	2.3438168162840958	0.5142230442717748	22543528	0.6906468454878163	2.779566124342457e-186	2.0825899186635858e-183	99.18991899189919	96.88223281143635
CD14_Mono	COTL1	VAF>=0.1	Before	2.2321654096578465	0.27453053991384513	110009770.03564453	0.6536474162711888	1.0456968417749213e-184	6.267906869598878e-182	99.87163029525033	98.94097607938977
NK_CD56low	GADD45B	VAF>=0.1	Before	0.8688071594459726	0.38503478557339893	81740668.39990234	0.6462097986511034	2.230756014986665e-184	2.0892424302859484e-181	67.57565680079813	49.29396662387677
CD14_Mono	CCDC200	VAF>=0.1	Before	0.8426789132325628	0.444575	106431065.20800781	0.6323837488403412	1.4064841901815127e-183	8.106217534565372e-181	57.09242618741976	35.658742501666296
CD4_TCM	ZFP36	VAF>=0.1	Before	2.013732291931776	0.9078070730814127	22885413.196289062	0.7196976348457894	1.92965064940151e-183	4.8193024968802715e-180	87.55852842809364	72.81617301363423
CD14_Mono	TXNIP	VAF>=0.1	After	1.1315011527389331	-0.291386	127714179.48046875	0.3898713364137404	1.5416522564151192e-181	3.0802212083174083e-179	80.6508	91.90875339686913
CD16_Mono	JUNB	VAF>=0.1	Before	2.3245162507120765	0.6324165237648751	12788494	0.7447298335993771	4.692774189662703e-180	1.406424424641912e-176	98.54014598540147	94.38500753931213
NK_CD56low	IFITM2	VAF>=0.1	After	1.7496496996109663	-0.279762	114508144.86425781	0.3865541731494825	4.846240592221224e-177	7.564678674420318e-175	94.11357340720221	98.08914713567056
B	HLA-DRB5	VAF>=0.1	After	2.493000796579522	0.6995182537261031	13349801	0.7414375460906109	9.791027786464898e-176	1.467185513801765e-171	97.89303079416531	91.58385306010555
NK_CD56low	SRSF7	VAF>=0.1	Before	1.05291	0.3589041009609769	81997949.27490234	0.6482437607618258	1.9927750643662102e-174	1.6589852410848699e-171	80.64516129032258	65.60880521085912
NK_CD56low	MT2A	VAF>=0.1	After	0.9023701523374299	0.25834463552333764	179810771.65039062	0.6070013992548988	1.1877634182427592e-171	1.7798634822367745e-169	72.99168975069253	57.45232617088484
NK_CD56low	JUNB	VAF>=0.1	Before	1.8024819516396282	0.4949575809260205	82345608.115234375	0.6509922157672476	1.7201162618758665e-171	1.3566285360110454e-168	93.48187562354506	83.91812865497076
CD14_Mono	PLAUR	VAF>=0.1	Before	1.1496489324267458	0.4218236002167355	108123891.54248047	0.6424420514744196	6.115769653039025e-171	3.3942521574366587e-168	76.18741976893453	59.57564985558764
NK_CD56low	ANXA1	VAF>=0.1	After	1.5711919123358291	0.2564596839472746	180835142.53027344	0.6104594488018626	6.515455521296807e-170	9.479038930741034e-168	94.71952908587258	89.70284288109815
CD14_Mono	PLBD1	VAF>=0.1	After	0.8779179235023412	0.2527863443952889	1.97274e+08	0.6022167047625138	2.83612774345313e-169	5.120406534415078e-167	70.95230499282182	58.02809354307804
CD8_TEM	TUBA4A	VAF>=0.1	After	0.9080543254885228	0.39507898501227956	2.19249e+07	0.6716934099808892	4.717078753695327e-169	3.2129738692783855e-166	75.60756075607561	53.30156569094622
CD16_Mono	EIF1	VAF>=0.1	Before	2.484349599545705	0.4313108028442172	1.2658e+07	0.737133	4.1863285496585736e-169	1.0455355552772288e-165	99.67558799675588	99.31787175989086
CD8_TEM	DNAJB1	VAF>=0.1	After	0.9423634969356227	0.41769872129548624	21901401	0.6709745481015086	2.5844786739227766e-168	1.6838440403796873e-165	75.11251125112511	51.19809394145677
CD8_TEM	H3F3B	VAF>=0.1	After	2.294523110019577	0.3215098512773298	22185494	0.6796780631092381	1.1825569424799588e-165	7.383589909609242e-163	99.86498649864987	99.22396187882913
CD14_Mono	ANXA1	VAF>=0.1	After	1.7860795039683328	0.25525777273074546	198046104.46557617	0.6045726459945466	2.878571167496472e-163	4.792820993881626e-161	96.76184399425746	92.96704558502698
NK_CD56low	SRSF2	VAF>=0.1	Before	0.7548650168084204	0.30278539969644525	80486663.98730469	0.6362961295456854	7.336186038213331e-162	5.496637389131338e-159	68.27402726970402	48.80901440593353
CD14_Mono	TNFAIP3	VAF>=0.1	Before	0.6536382974121752	0.30029957450500644	1.04645e+08	0.6217730579212916	2.148016211056584e-161	1.1495722472386753e-158	54.62130937098845	33.4537
CD4_TCM	CSRNP1	VAF>=0.1	Before	0.6148038560708589	0.3682889805435442	21189734	0.6663721258606891	3.1899524153304227e-161	6.828776706246627e-158	56.38795986622074	26.850023507287258
CD8_TEM	CD69	VAF>=0.1	After	1.310967231765215	0.4766815070759006	21955293	0.6726255913542342	1.3120600836018953e-159	7.86448814110976e-157	86.72367236723673	64.11844792375766
CD8_TEM	AC020916.1	VAF>=0.1	After	0.49523719756706736	0.28004578344874015	20679117	0.6335284753798729	3.6148722065459593e-159	2.083417692888123e-156	47.65976597659766	21.266167460857726
CD8_TEM	TUBB4B	VAF>=0.1	After	0.7085762282583337	0.34810187946150645	21459784	0.65744510461937955	1.5220400650252028e-158	8.447322360889876e-156	64.0864	39.823008849557525
NK_CD56low	KLF6	VAF>=0.1	Before	1.5015270933651446	0.4051505221467575	81476827.212890625	0.6441239732758987	8.695290372529043e-158	6.204710772968938e-155	91.22048553375457	79.18271287976037
CD4_TCM	DUSP1	VAF>=0.1	Before	2.0575751928697517	0.7442466440825968	22351613	0.7029107525004993	4.77300644291918e-155	8.94043769339299e-152	89.83277591973244	74.21720733427362
NK_CD56low	SERTAD1	VAF>=0.1	Before	0.5326561664264864	0.27770691821852955	7.79322e+07	0.6161012779115249	7.316820925964369e-153	4.983752798889821e-150	47.75523777851679	29.097133076593924
CD8_TEM	KLF6	VAF>=0.1	After	1.6789893299914727	0.4601951312649082	2.19162e+07	0.6714285298509429	2.0557220627390162e-152	1.1001783967908628e-149	94.32943294329434	84.00272294077604
CD14_Mono	MYADM	VAF>=0.1	Before	1.0428910450457687	0.31308	106833292.92578125	0.6347736739205416	8.738016287586716e-151	4.3646391356495644e-148	81.09756097560977	64.66896245278826
CD14_Mono	ACTG1	VAF>=0.1	Before	2.1907823247424294	0.2596386496630321	107481384.8671875	0.6386244557453661	9.577970657894464e-151	4.6298674293080176e-148	99.87163029525033	99.06687402799378
Platelet	FOSB	VAF>=0.1	Before	0.6096661143687323	0.43661445104198604	3.20327e+06	0.7556702293144911	1.509892719265059e-150	2.2625742398186907e-146	71.51898734177216	19.076372581907638
CD4_Naive	NR4A2	VAF>=0.1	Before	0.7539561329756566	0.37339146970553205	34027083	0.6577801132294555	4.3382274326916636e-150	3.250416903944229e-146	65.78799775659002	34.52590218178058
CD8_TEM	HSPA8	VAF>=0.1	After	1.9182801767627917	0.39713905998649546	2.18592e+07	0.6696824532691527	2.3633537082613313e-148	1.2212019075274502e-145	99.27992799279927	92.34853641933289
CD14_Mono	LGALS1	VAF>=0.1	Before	2.275836256766282	0.2937682691893202	107294620.02441406	0.6375147510628674	3.8676405897734934e-148	1.8111435699298686e-145	99.80744544287549	98.45960157002148
CD14_Mono	JUN	VAF>=0.1	Before	1.882184482012102	0.46217849982176906	107140495.9116211	0.6365989885076001	3.576464886202517e-147	1.5762743035219035e-144	90.2439	80.1081
CD8_TEM	ZNF331	VAF>=0.1	After	0.5000024376317544	0.28363961632417667	2.05709e+07	0.6302122809285694	1.0827287171555439e-146	5.233770911798653e-144	47.16471647164717	22.716133424098025
CD14_Mono	UBC	VAF>=0.1	Before	1.8431326863364175	0.27751089992871214	107082042.16796875	0.6362516726419515	1.61291799874982e-146	6.905593203218872e-144	99.42233632862644	96.4045
CD4_Naive	PPP1R15A	VAF>=0.1	Before	1.0598455614958822	0.45076360551494776	34727028.42236328	0.6713108110908196	1.451928654151045e-147	7.25238362748447e-144	81.49186763881099	50.67383586668045
CD8_TEM	BHLHE40	VAF>=0.1	After	0.6514464190516408	0.3260940558731544	2.11042e+07	0.6465517637536388	1.766861344266868e-146	8.273880388699692e-144	59.67596759675967	34.41116405718176
CD14_Mono	DUSP1	VAF>=0.1	After	2.1184839435724356	0.29043590095924676	196227302.67626953	0.5990204145418353	8.166472969152778e-146	1.2116296776510334e-143	98.10177061732334	93.57752516553757
CD8_TEM	FOSB	VAF>=0.1	After	0.6044142366299663	0.3014319178389079	2.09337e+07	0.6413268300962159	8.145534444109953e-146	3.6988131407572014e-143	56.975697569756974	29.82300884955752
CD16_Mono	NAMPT	VAF>=0.1	Before	1.781681093521734	0.6192219230532792	12337131	0.7184449956909481	9.438660726211961e-146	2.0205475854612322e-142	96.5126	78.20061750556474
CD14_Mono	AC007952.4	VAF>=0.1	Before	0.5515645286520048	0.2572729648401815	103382652.01123047	0.6142709265959635	1.0611140571126633e-144	4.416887262731461e-142	52.118100128369704	33.10005184033178
CD8_TEM	NR4A2	VAF>=0.1	Before	1.116137924572995	0.6972464634042738	7.85532e+06	0.7399945117336422	1.826370810074815e-144	9.1227221963237e-141	74.00257400257401	37.73971600058557
CD16_Mono	COTL1	VAF>=0.1	Before	2.8137556680095024	0.4807963455468838	12338020	0.7184967660418643	2.4077883255241078e-143	4.510088507247344e-140	99.18896999188969	97.50125655202126
CD4_TCM	FOSB	VAF>=0.1	Before	0.8778810207825014	0.4545857063542139	21475666	0.6753640799216319	4.95959097594064e-143	7.43194707744705e-140	67.49163879598662	40.01410437235543
CD4_TCM	CD69	VAF>=0.1	Before	1.7416792224711453	0.6365229401732322	22032889.994628906	0.692888	3.295804248748084e-141	4.489784242499094e-138	88.49498327759197	74.09496944052655
CD8_TEM	EIF1	VAF>=0.1	Before	2.5742387455040214	0.5075650221123977	8161394	0.7688277398422326	1.9451573996381294e-141	7.287045908394343e-138	100	99.61206265554091
CD8_TEM	FOSB	VAF>=0.1	Before	0.8409895182074387	0.5340330875383414	7.6868e+06	0.7241196118007712	8.333448078683176e-141	2.497534389181348e-137	69.88416988416989	30.917874396135264
CD8_TEM	JUNB	VAF>=0.1	Before	2.278359527304395	0.9591528743981204	8142375	0.7670360931230497	1.0937233736937176e-140	2.7315741258000597e-137	96.78249678249678	82.05972771190162
CD14_Mono	MT-ATP6	VAF>=0.1	Before	2.5259409087248277	0.2993710511319758	106619503.06689453	0.6335033941186566	1.7047522430956645e-139	6.904246584537441e-137	99.90372272143773	99.14463452566096
CD8_TEM	MALAT1	VAF>=0.1	After	3.847598409876364	-0.385285	1.09316e+07	0.3349017560026935	2.6006881156818292e-139	1.1462150415733003e-136	100	100
CD8_TEM	SRGN	VAF>=0.1	After	1.9431808395388845	0.28957920666401593	2.16711e+07	0.6639188818101092	5.670663713686859e-139	2.427854164274217e-136	99.05490549054905	97.5357
CD4_Naive	ZFP36	VAF>=0.1	Before	1.5251872958888117	0.539343	34846918.623046875	0.6736284176214986	3.712577575990949e-139	1.390824374405609e-135	89.73639932697701	75.86943783821046
CD14_Mono	KLF4	VAF>=0.1	Before	0.9738527327162356	0.3139054664407389	105568657.25488281	0.6272595609600354	1.1564761965347404e-137	4.560472580282391e-135	74.39024390243902	58.864696734059095
CD8_TEM	JUN	VAF>=0.1	Before	2.2503478017434246	1.1149179977832888	8.08923e+06	0.7620300989866208	3.708823772099699e-138	7.93953203213057e-135	90.991	68.7235
CD4_Naive	DUSP2	VAF>=0.1	Before	0.6545168934924622	0.32940057438153925	3.34338e+07	0.6463115950169049	2.7231541853630886e-138	8.161293093533176e-135	60.12338754907459	30.858580636266502
CD8_TEM	NFKBIA	VAF>=0.1	Before	1.4986385904055788	0.819665	7.98798e+06	0.7524916691583359	9.352860771682015e-137	1.7519077332956873e-133	85.71428571428571	55.13102034841165
CD14_Mono	GADD45B	VAF>=0.1	Before	0.6091447800567946	0.26320193125034175	103383520.6015625	0.6142760875178175	5.608313648405964e-136	2.1548866672144452e-133	55.39152759948652	36.87699029845219
NK_CD56low	HLA-DRB1	VAF>=0.1	After	1.0704538598638214	0.28216894064464526	176673506.52685547	0.596411	2.010048925072513e-135	2.2311543068304894e-133	74.54986149584487	64.43083882541045
CD16_Mono	PPP1R15A	VAF>=0.1	Before	1.0650427118750039	0.4769653160356825	12075097	0.7031856119654384	2.020880533941191e-136	3.364766089012083e-133	83.86050283860503	56.932577008688156
CD4_TCM	JUNB	VAF>=0.1	Before	2.554369401288243	0.7110594298821367	21970539	0.6909267846276493	1.9369663190065244e-135	2.4187866908593973e-132	93.9799	88.99388810531265
CD14_Mono	S100A9	VAF>=0.1	After	3.9010853233930964	0.31017377674842894	194933716.42578125	0.5950715014117828	4.606588885015826e-134	6.218894994771366e-132	99.9681	99.79714471619397
NK_CD56low	CD69	VAF>=0.1	Before	1.2459991842914586	0.41691423064574673	79704071.41503906	0.6301092583290778	3.0683744131069563e-134	1.999112633930771e-131	77.78516794146991	61.86944325583607
NK_CD56low	MT-CO1	VAF>=0.1	Before	3.9518179383740613	0.2607234488593102	80222741.93359375	0.63421	5.761763764733789e-134	3.59750125060566e-131	100	99.95721009841677
B	EIF1	VAF>=0.1	Before	2.506722733518076	0.6643975065550685	6245274	0.7875724626304119	1.5457703196424723e-132	2.316336823984245e-128	100	98.34487148881993
NK_CD56low	MTRNR2L12	VAF>=0.1	Before	2.114219429123472	0.4313901790765844	79977844.541015625	0.6322736017345889	7.191692157598377e-131	4.1449041146773724e-128	99.00232790156302	88.99110920933771
CD16_Mono	LAPTM5	VAF>=0.1	Before	1.715809795432234	0.36514116522830653	12132298.776367188	0.7065167211167993	9.976038509537225e-131	1.4949093706541532e-127	99.10786699107868	94.7871
NK_CD56low	EEF2	VAF>=0.1	Before	1.5451710821661955	0.2816136889763643	79819996.19042969	0.6310257143261998	4.304228779182867e-130	2.388846972446491e-127	97.1733	89.47843864403556
CD16_Mono	NFKBIA	VAF>=0.1	Before	1.7178385191741146	0.654206	1.21106e+07	0.7052530775260714	6.97553747382492e-130	9.502584458660584e-127	91.322	73.66984993178718
NK_CD56low	HOPX	VAF>=0.1	After	0.8903566155016485	-0.250304	119789567.93066406	0.40438308941484863	1.327439958446378e-128	1.3813672067582622e-126	68.68074792243767	79.5305
CD14_Mono	TAGAP	VAF>=0.1	Before	0.6161000552938378	0.25903660147421503	103025892.1484375	0.6121511588474414	5.841086094060225e-129	2.0840160742736302e-126	55.905006418485236	38.05080352514256
CD14_Mono	IL1B	VAF>=0.1	Before	0.8927988283964489	0.3816508383317786	102517488.36523438	0.60913	6.095155518271036e-128	2.1240908242160808e-125	53.337612323491655	34.17944160556913
B	FOS	VAF>=0.1	Before	2.4106204352040934	1.345363995642665	6123397	0.7722029257569286	7.198378361435805e-129	5.393384987305777e-125	91.44215530903328	54.834089281451426
CD8_TEM	TRBV19	VAF>=0.1	Before	0.48919008101685735	0.4314359589337981	6236001	0.5874499570151744	5.875365862727778e-128	9.78248416144175e-125	20.334620334620336	3.1181379007465964
NK_CD56low	RPS19	VAF>=0.1	Before	3.0474459069055504	0.3071566677227593	79777637.337890625	0.6306908417822608	2.787141336962907e-127	1.4916183190853273e-124	99.96674426338544	99.72186563970902
NK_CD56low	HSP90AB1	VAF>=0.1	Before	1.1724704184035715	0.2949038331309727	79419236.83300781	0.6278574673723072	6.832712863731703e-127	3.5306276642420543e-124	86.2986	76.18979698568916
CD14_Mono	ID2	VAF>=0.1	Before	0.8561991407164798	0.33660912023022194	103794819.52929688	0.6167199112013101	1.2647337402140533e-126	4.120007629805997e-124	62.58023106546855	45.8046
CD4_Naive	FOSB	VAF>=0.1	Before	0.8588073826849751	0.37352625308821485	33843659.71533203	0.6542343438504636	2.522094150743536e-127	4.724197606111486e-124	74.31295569265284	44.180195084961916
CD14_Mono	AC020916.1	VAF>=0.1	Before	0.9724402643312627	0.30182815341965574	104623698.70117188	0.6216448804010598	3.498358935472819e-126	1.0921439301679206e-123	75.1605	58.10005184033178
CD4_TCM	RPS19	VAF>=0.1	Before	3.519881445096115	0.3336271209822157	2.17644e+07	0.684443	3.8321890061434224e-126	4.4173347890045526e-123	100	99.9953
CD14_Mono	CD83	VAF>=0.1	Before	0.8490619364489096	0.3007836724774745	103871464.67382812	0.6171753153047488	9.103290381140258e-124	2.6747609090467993e-121	65.69319640564827	49.46493371843294
CD14_Mono	DDX5	VAF>=0.1	Before	1.2423162303951352	0.2502126703729415	104890079.19628906	0.6232276391171444	2.190761192201754e-123	6.313183935604478e-121	92.93966623876764	84.25535066281567
CD8_TEM	ZFP36	VAF>=0.1	Before	2.1352454054270584	0.92723	7.95311e+06	0.7492065281920355	1.438582137796292e-123	2.1557153334877435e-120	93.95109395109395	76.5993
CD4_TCM	KLF6	VAF>=0.1	Before	1.665435214094443	0.5006357291528458	21641941.822265625	0.6805931013507059	3.056739450820906e-123	3.053682711370085e-120	92.44147157190635	81.56088387400095
CD16_Mono	RPS26	VAF>=0.1	After	1.9039682087774925	0.44818912362163377	1.21428e+07	0.6961965111900336	4.97137849403633e-123	7.449610673313441e-119	98.38709677419355	94.70737533592117
CD4_TCM	MT-CO3	VAF>=0.1	Before	2.908598323991972	0.34925372915255304	2.1637e+07	0.6804367009291274	6.6164860827776104e-121	6.196752746901406e-118	100	99.6756
NK_CD56low	YPEL5	VAF>=0.1	Before	0.6820528919256174	0.27928695616908916	7.76262e+07	0.6136825453430972	2.0478020060859204e-120	9.589472831624223e-118	59.02893249085467	41.79147054628441
CD8_TEM	GADD45B	VAF>=0.1	Before	1.0408641217417296	0.6067137319400695	7717892	0.7270485241499735	1.5074571772431722e-120	2.0535678000899033e-117	75.03217503217503	45.78392621870883
CD8_TEM	HSP90AA1	VAF>=0.1	After	1.5454165215501299	0.31809953520392376	21261382.50390625	0.6513668471515506	6.205881381120286e-120	2.4472403288444078e-117	96.12961296129613	89.74132062627638
CD8_TEM	DDIT4	VAF>=0.1	After	0.7382148069322592	0.32328402125656797	2.08402e+07	0.6384619520495276	1.755478706894841e-119	6.745089339184407e-117	64.0864	42.362151123213074
CD4_TCM	DUSP2	VAF>=0.1	Before	0.8621746174708931	0.45699829404317716	2.08195e+07	0.6547283453857318	3.4540693945522524e-119	2.8755127709647504e-116	60.468227424749166	35.28913963328632
CD8_TEM	PPP1R15A	VAF>=0.1	Before	1.1416267969621847	0.621692	7729885	0.7281783006420688	2.3077621743309975e-119	2.881818015195833e-116	79.40797940797941	46.23773971600059
NK_CD56low	SRSF5	VAF>=0.1	Before	1.0997217119567826	0.2615285004700919	78832920.59472656	0.6232222801918944	8.873599341718834e-119	4.0294207919895973e-116	85.33422015297639	76.2445
CD4_TCM	TNFAIP3	VAF>=0.1	Before	1.251268446466734	0.5494981037629586	21290731	0.6695482669861771	5.805891417471488e-119	4.5140627315664905e-116	75.51839464882943	52.5717
CD4_TCM	GADD45B	VAF>=0.1	Before	0.7273922752824048	0.38739744872684906	20886305.512695312	0.6568299444377453	6.02477508383916e-119	4.5140627315664905e-116	61.87290969899666	38.49553361542078
B	DUSP1	VAF>=0.1	Before	2.138741185622147	1.0277436392618073	6087764	0.767709	5.538228775236421e-119	2.7663452732305924e-115	96.19651347068145	65.97437733747115
CD8_TEM	TRBV7-3	VAF>=0.1	Before	0.4246971508794957	0.38534301439208346	6.03694e+06	0.5686973911611592	1.0925431184313647e-117	1.2593660484379999e-114	15.572715572715573	1.9470062948323819
CD14_Mono	IFITM3	VAF>=0.1	After	1.8715277124900545	0.25944317945621553	192637468.91992188	0.5880617779222854	4.4528837460246414e-116	4.633782148206892e-114	95.82070505662786	90.46771539020936
CD14_Mono	SLC2A3	VAF>=0.1	Before	0.7189609083342681	0.2836359589713915	102550734.45019531	0.6093279041340033	2.5568731708074586e-116	6.605990424922375e-114	58.440308087291406	41.977708657335405
CD4_TCM	JUN	VAF>=0.1	Before	2.0651203325168233	0.7339713893749191	21451394	0.6746007770770143	1.596891487644137e-115	1.0877008610157907e-112	83.87959866220736	73.39915373765868
CD14_Mono	IER3	VAF>=0.1	Before	0.5998584988033012	0.2836470806397764	101227778.07910156	0.6014672658150181	5.635362164518766e-115	1.4312864751748086e-112	47.81771501925546	32.8501
CD8_TEM	RPL3	VAF>=0.1	After	2.63864	0.26240817508923486	2.1195e+07	0.6493337403856111	1.1414431907234489e-114	4.2761315532477205e-112	100	99.63921034717494
CD4_TCM	LMNA	VAF>=0.1	Before	0.6599859487574445	0.3768731339624286	2.032e+07	0.6390199426705222	1.1966541623920573e-114	7.796462010193469e-112	51.30434782608696	26.455101081335215
NK_CD56low	TUBA1A	VAF>=0.1	Before	0.7504520760758103	0.2740533097470782	77722821.00927734	0.614446	2.1226728095078395e-114	8.59682487850675e-112	65.48054539408048	48.77335615461418
B	PPP1R15A	VAF>=0.1	Before	1.2318168734693355	0.7314424666738747	5902068	0.7442918003873249	5.813253421231531e-115	2.1777900629288624e-111	78.92234548335975	43.52669690459139
CD14_Mono	RETN	VAF>=0.1	Before	0.8301153348537389	0.3431978287452289	102283884.18408203	0.6077423541694892	1.9257555270872787e-113	4.7307289464594875e-111	57.73427471116817	41.209360882766795
B	ZFP36	VAF>=0.1	Before	1.7891755366584825	0.8741802991430699	6046040	0.7624476703443237	1.7764940228202877e-114	5.3241525863924024e-111	93.34389857369256	69.90530755152383
CD14_Mono	MT-CO1	VAF>=0.1	Before	3.6469376970873726	0.2867368961740837	104389005.63476562	0.6202503995615534	3.2228972375719664e-113	7.789534694357405e-111	100	99.80189587499075
NK_CD56low	TYROBP	VAF>=0.1	Before	1.5894384710889942	-0.398853	47682107.84082031	0.37695612123369304	2.0254735047352285e-113	7.987294860120368e-111	84.56933821084137	96.15841772452812
NK_CD56low	BTG2	VAF>=0.1	Before	0.77767	0.31243276072566195	77201835.044921875	0.610328	1.1456815618296873e-112	4.2920095510044664e-110	58.663119388094444	41.7106
CD16_Mono	BCL2A1	VAF>=0.1	Before	1.2671443802735378	0.4603254158992012	1.1837e+07	0.6893210286448438	4.311328966818381e-113	4.61466175484096e-110	87.0235	67.58813814891937
NK_CD56low	TNFAIP3	VAF>=0.1	Before	0.9032163465503343	0.32546275514018763	77528012.75683594	0.6129061884876266	2.5503221082914595e-112	9.099184950654172e-110	64.88194213501829	45.87077449721866
Platelet	NAMPT	VAF>=0.1	Before	0.3835813066767536	0.2807850129963687	2917764	0.6883171478435153	6.801042726947533e-113	5.095681263165439e-109	51.0549	12.68030862126803
B	JUNB	VAF>=0.1	Before	2.246506101629298	1.025572773617827	6.04376e+06	0.7621604617633005	3.5331017516551185e-112	8.82392162475866e-109	95.4041	75.44362218508793
CD4_Naive	JUN	VAF>=0.1	Before	1.949527946696814	0.6078614760424019	33987939.00463867	0.6570234176966345	6.048245281119253e-112	1.0070328393063556e-108	93.49411104879417	79.86075207665529
CD8_TEM	LAIR2	VAF>=0.1	Before	0.6609893686625579	0.4089336755882221	7.31503e+06	0.6890978593877145	1.9828727098992423e-111	2.1223819684171536e-108	61.261261261261254	26.39437856829161
CD16_Mono	H3F3B	VAF>=0.1	Before	2.229487580475934	0.3531409518685742	1.18681e+07	0.691132	8.058506119151394e-111	8.050447613032243e-108	99.91889699918897	98.81525095138939
CD4_TCM	RPL41	VAF>=0.1	Before	4.173450101669542	0.354564	2.13644e+07	0.6718660226141676	1.04205087061409e-109	6.246052918460856e-107	100	99.98119417019275
B	RPS26	VAF>=0.1	After	2.2956163700920498	0.6860763184864564	1.243e+07	0.6903498215580374	1.083375114426094e-110	8.117188044837509e-107	96.43435980551054	89.94585703515867
CD16_Mono	TSC22D3	VAF>=0.1	Before	1.6288436421516934	0.4306973421633262	1.18263e+07	0.6886983868090777	2.0098117818873309e-109	1.8823143469738534e-106	97.16139497161394	87.78631435341423
CD14_Mono	KLF6	VAF>=0.1	Before	1.6544490873797344	0.3032330616431367	103855364.00097656	0.6170796495906378	9.249622562140561e-109	2.1000847589950954e-106	94.28754813863928	87.57128045619493
CD4_TCM	MT-ATP6	VAF>=0.1	Before	2.647675282790657	0.44991482728285437	21340801	0.6711228621340843	5.737980361543657e-109	3.30706291222045e-106	99.93311036789298	97.56464503996239
CD4_TCM	UBC	VAF>=0.1	Before	2.077005127184226	0.31579837734666527	21295026.165527344	0.6696833408187877	6.214700669734507e-108	3.4491588717026515e-105	99.19732441471571	98.07710390220969
CD4_TCM	MTRNR2L12	VAF>=0.1	Before	2.0493988220497408	0.5635972222744245	21293290.306640625	0.669629	7.507034093022846e-108	4.017603781569549e-105	98.92976588628763	82.41654913023038
B	CD69	VAF>=0.1	Before	1.926528003113314	1.0158839629784882	5943511	0.7495180507598133	1.668783030007014e-107	3.572387672093587e-104	87.00475435816165	57.41227023155885
CD14_Mono	TSC22D3	VAF>=0.1	Before	1.3766080438350212	0.27945813070478964	103468732.91308594	0.6147823953416021	8.244551952668468e-106	1.8439494180707013e-103	91.46341463414635	82.99822261719618
CD14_Mono	ANXA1	VAF>=0.1	Before	1.838340451795809	0.2831437457234427	103598388.37353516	0.6155527719790646	1.2456339163345772e-105	2.7051919183005275e-103	96.53401797175867	93.68658816559284
NK_CD56low	HLA-DRB5	VAF>=0.1	Before	0.8537198152280032	0.298883	77238961.77001953	0.6106210642814394	8.785207704335816e-106	2.8618769010754826e-103	65.1812	48.79950553891504
CD4_Naive	EIF1	VAF>=0.1	Before	2.450964946574226	0.3276866796926816	33819976.81201172	0.6537765278564321	4.450957100777735e-106	6.669759215515436e-103	100	99.45541653741427
NK_CD56low	HSPA5	VAF>=0.1	Before	1.0193933527891768	0.2877856049017661	77762891.60302734	0.6147630489082214	6.6637492865769495e-105	2.04604295490578e-102	77.08679747256402	64.27756382826986
NK_CD56low	HSP90AA1	VAF>=0.1	Before	1.4493046348249776	0.25108827740181017	78063825.21142578	0.617142	7.200075766082442e-105	2.157862707094908e-102	94.28001330229463	89.43089430894308
Platelet	FOSB	VAF>=0.1	After	0.46019328527206654	0.2946340133083716	3.87452e+06	0.6785119748105185	5.012600833480915e-106	7.511382348971152e-102	55.12265512265512	18.567961165048544
NK_CD56low	IFNG	VAF>=0.1	Before	0.5369279222214052	0.26772210939374946	74781128.318359375	0.5911903929766137	3.646397514971288e-104	1.0713973874871518e-101	41.170601928832724	25.169970997955595
CD4_Naive	MTRNR2L12	VAF>=0.1	Before	2.402637101757764	0.557849	33760610.10449219	0.6526289055464546	1.453611473777375e-104	1.8151973278794972e-101	99.38306225462703	88.19839382345846
CD16_Mono	NR4A1	VAF>=0.1	Before	1.1177815453962328	0.4837303978479264	11623196	0.6768694439683786	6.82625520382081e-104	5.6828574571808246e-101	77.69667477696674	55.42471458318374
CD14_Mono	SERPINB1	VAF>=0.1	Before	1.2527199271073166	0.25090489703518104	103161492.84863281	0.6129568604437498	3.1107236655398647e-103	6.299215422718226e-101	88.22207958921695	81.04125009257203
CD8_TEM	DUSP1	VAF>=0.1	Before	2.0176845053140937	0.8584081853003953	7.70663e+06	0.7259880339590484	7.664784379093399e-104	7.657119594714306e-101	92.53539253539253	66.01522471087688
NK_CD56low	IER2	VAF>=0.1	Before	1.4088234881687103	0.33902106643460383	77907517.45361328	0.6159064043959653	4.302441242415711e-103	1.19392744477036e-100	87.03026272031926	81.61698283649503
CD4_TCM	NFKBIA	VAF>=0.1	Before	1.309426600160147	0.4986631936171596	21044069.06640625	0.6617912731014131	6.254807901079312e-103	3.232010220609431e-100	79.19732441471572	66.22943112364833
CD16_Mono	FOSB	VAF>=0.1	Before	1.308381989215407	0.5131933530623901	1.16417e+07	0.6779486723467302	3.3454651869322282e-102	2.638515569798918e-99	84.75263584752636	59.3164
CD8_TEM	CSRNP1	VAF>=0.1	Before	0.504959	0.3422061618609874	7.00815e+06	0.6601886565654682	7.671721083398856e-102	7.185046277170741e-99	48.26254826254826	18.803981847460108
NK_CD56low	CCL4	VAF>=0.1	After	1.6430610255076261	0.3704477636729866	173087200.89648438	0.5843041113329851	2.542035370067126e-100	1.8581658546563845e-98	84.40096952908587	77.21405451780214
B	NFKBIA	VAF>=0.1	Before	1.6018033601757018	0.7488753759353289	5916996	0.7461743249526437	1.164415424704263e-101	2.1810956423991726e-98	90.96671949286846	68.44911275562983
CD4_TCM	GIMAP7	VAF>=0.1	Before	0.8641919157931086	-0.3658	10720194.196289062	0.3371273370501283	8.957917707417143e-101	4.474479894854863e-98	76.38795986622074	88.8811
CD4_Naive	GADD45B	VAF>=0.1	Before	0.5797729588299563	0.2823980107456474	3.2339e+07	0.6251483738583236	4.183207105015684e-101	4.821950651435387e-98	54.62703309029725	31.751283907214006
CD14_Mono	FOS	VAF>=0.1	After	2.9009970575742594	0.2753103994148418	190483842.79589844	0.5814874327828174	4.509991348298464e-99	3.9064867256793344e-97	99.60121231456372	97.73223102537605
B	FOSB	VAF>=0.1	Before	0.9044853496983729	0.5624628113836809	5603253	0.7066091518084304	6.641709177710742e-100	1.1058445780888385e-96	66.40253565768622	30.34137025543089
CD8_TEM	H3F3B	VAF>=0.1	Before	2.4002658789401847	0.44484372379409076	7691023	0.7245173839376738	2.500276274129341e-99	2.20391999810754e-96	99.74259974259975	99.01185770750988
Platelet	DUSP2	VAF>=0.1	Before	0.6361553497961714	0.4026024334216593	3.03281e+06	0.7154560929959127	1.6918387951944252e-99	8.450734781996154e-96	66.66666666666666	21.793581572179356
B	PABPC1	VAF>=0.1	After	2.0458969682134236	0.41342284040976507	1.2251e+07	0.6804091341135557	2.4066231677087763e-99	1.2021082722705338e-95	99.67585089141005	93.45486944006579
CD8_TEM	ZFP36L2	VAF>=0.1	After	1.7023833738251835	0.33000554869941223	2.07932e+07	0.6370247924266984	8.461022228192505e-98	2.817520401988104e-95	95.99459945994599	90.30633083730429
CD16_Mono	UBC	VAF>=0.1	Before	1.9362759496957607	0.36105624190626573	1.16586e+07	0.6789304455144427	1.0104925427132344e-97	7.571115376278909e-95	98.62124898621249	96.50319523228261
CD8_Naive	CSRNP1	VAF>=0.1	Before	0.8679212534543661	0.6496789012297327	1112414	0.7927422665131182	1.710288876557507e-98	2.5628678815214245e-94	76.86567164179104	23.357524828113064
CD4_TCM	PTGER4	VAF>=0.1	Before	0.5856921821527437	0.2811399311338786	2.02233e+07	0.6359800337435709	1.5259769676307203e-96	7.376375761273014e-94	57.324414715719065	33.19699106723084
CD8_TEM	GADD45B	VAF>=0.1	After	0.7479903390249394	0.2932175594530739	20433457	0.626002	3.7161542370202156e-96	1.184820664718041e-93	64.98649864986498	47.07283866575902
CD14_Mono	CCL3L1	VAF>=0.1	Before	0.5582222306166608	0.2582681237512981	98020511	0.5824105780420402	1.8696105829830076e-95	3.2202430558621112e-93	38.18998716302953	23.089313485892024
Platelet	NR4A2	VAF>=0.1	Before	0.5158244666835916	0.3469367209265062	2959293	0.6981140755020899	1.3224560428799237e-96	4.954250950638914e-93	58.86075949367089	18.047635021804766
CD16_Mono	NR4A2	VAF>=0.1	Before	0.6889811582906988	0.3368005041234608	11217304	0.6532325808929204	1.130975552841317e-95	8.070318409203397e-93	62.61151662611517	34.558770733108354
CD4_TCM	RGS1	VAF>=0.1	Before	0.4525137835406925	0.2737202325249627	19309010	0.6072273508466555	3.0840306223773486e-95	1.4441937148851427e-92	37.257525083612045	16.732487070992008
CD4_TCM	YPEL5	VAF>=0.1	Before	0.9072442829218201	0.39514537616179557	20624532.770263672	0.6485977477114176	4.8107823945787435e-95	2.184532550992802e-92	68.56187290969899	50.3244
CD8_TEM	SRSF2	VAF>=0.1	After	0.745407	0.261996	20463213	0.6269140086234628	1.146631893805338e-94	3.5065875364638755e-92	70.79207920792079	51.96732471068755
B	NR4A2	VAF>=0.1	Before	0.8082830908789516	0.5199150637210275	5475360	0.6904809555174124	6.784613818384624e-95	1.0166743806849358e-91	60.063391442155314	25.551046391342403
CD4_Naive	TNFAIP3	VAF>=0.1	Before	0.9929025855364132	0.35589326338260485	32884481.920410156	0.6356924054024664	1.2522390435525512e-94	1.2509868045089987e-91	77.17330342120022	48.68851893978562
B	TUBA1A	VAF>=0.1	Before	1.0939636722705601	0.6199665916606826	5.73214e+06	0.7228627614622706	1.0387162700150822e-94	1.4150148460160005e-91	75.91125198098257	45.92185883663563
CD16_Mono	RPS16	VAF>=0.1	After	2.0377297022673164	0.32709927897311286	1.17339e+07	0.672753	3.06154934793264e-95	2.2938658489385304e-91	99.76958525345621	97.7008
CD14_Mono	MT-ND5	VAF>=0.1	Before	1.5452485980744863	0.2653910512530264	102308970.47363281	0.6078914099155687	4.210911084684661e-93	7.011166955999961e-91	95.08985879332478	89.32459453454787
CD4_TCM	SLC2A3	VAF>=0.1	Before	1.06336	0.3847583397498704	20740575.274169922	0.6522470379770815	2.8720693289877596e-93	1.2658223204376936e-90	78.99665551839465	62.17207334273625
CD4_Naive	FOS	VAF>=0.1	Before	2.3937560542614325	0.6214602604787169	3.33124e+07	0.6439646671240012	1.475044362549327e-93	1.381471235800104e-90	96.74705552439708	81.94602419605005
CD16_Mono	PTMA	VAF>=0.1	Before	2.5867920019558577	0.2854955029214823	1.15978e+07	0.6753910190146268	2.952993927770903e-93	2.0113915458021354e-90	99.83779399837795	99.2389
CD4_Naive	NFKBIA	VAF>=0.1	Before	1.1161095272608186	0.35516420702715323	3.30865e+07	0.6395973814675956	7.001454637629743e-93	6.171576337934218e-90	84.9131	66.13587012718438
CD4_Naive	PCBP1	VAF>=0.1	After	1.2688605710980734	0.31815579822148077	26567091.540039062	0.6493209549166741	9.022750434003158e-94	6.760295762676866e-90	96.12015018773467	83.26042805811592
CD4_TCM	MT-CO2	VAF>=0.1	Before	3.1459339810956406	0.26966033382744836	20903746	0.6573784107186941	2.140393880019841e-92	9.163943512027804e-90	100	99.8637
B	CD83	VAF>=0.1	Before	1.255132021868464	0.678815	5724991	0.7219611598157174	3.740388493863034e-92	4.670810131711463e-89	78.76386687797148	47.12341847696347
CD4_Naive	UBC	VAF>=0.1	Before	1.842595335471619	0.30434367305827537	33222272.614257812	0.6422222628353521	8.218242769555318e-92	6.841687105654802e-89	99.38306225462703	96.12932133871024
CD4_Naive	KLF6	VAF>=0.1	Before	1.3806598859153874	0.3692663838333192	33148909.89819336	0.6408040826263787	8.924420962877233e-92	7.038549901511334e-89	90.91418956814358	77.53076207217454
CD16_Mono	SOCS3	VAF>=0.1	Before	0.40448959291612063	0.25537949773037893	10643232	0.6198018622301864	2.890315898589435e-91	1.883103640885334e-88	40.22708840227088	17.627629783873054
CD14_Mono	MT-CYB	VAF>=0.1	Before	2.4741823448095115	0.2746289145998695	102126251.99365234	0.606806	6.220060333255707e-90	9.320760409383675e-88	99.61489088575097	98.23372583870251
CD8_Naive	NR4A2	VAF>=0.1	Before	1.1896463395773382	0.8437607860373455	1.1373e+06	0.8104786181772573	1.5437588007665037e-91	1.1566612814743028e-87	83.95522388059702	32.06646294881589
CD16_Mono	EEF1A1	VAF>=0.1	Before	3.6642552915738333	0.3204165187030741	1.15538e+07	0.6728286486989191	2.5833378718965857e-90	1.5484527204148135e-87	100	99.83485316292095
B	TSC22D3	VAF>=0.1	Before	2.077491865633763	0.7572103947462512	5.83747e+06	0.7361449760819251	1.3800814627493772e-90	1.590809286099955e-87	97.30586370839937	82.12779501869977
CD14_Mono	S100A12	VAF>=0.1	After	2.0461946381543705	0.2752901974662272	189026912.8984375	0.5770398827261607	4.2903162300654146e-89	3.280121872833175e-87	92.02424629127452	88.27458185019329
CD14_Mono	RPS26	VAF>=0.1	Before	1.530357653981522	-0.26194	66351257.775390625	0.39424069514166954	1.0295812336853611e-88	1.469359503502394e-86	97.91399229781771	97.58016737021403
Platelet	TNFAIP3	VAF>=0.1	Before	0.6514604415462708	0.39819933875343416	3.01423e+06	0.711074	9.837248028995101e-90	2.948223234289832e-86	68.77637130801688	24.097059152409706
B	EEF2	VAF>=0.1	After	2.1068934376425106	0.40895209467920957	1.20869e+07	0.6712952590499216	1.2692021763945905e-89	4.754748653318235e-86	99.59481361426256	93.92776368994585
NK_CD56low	GNLY	VAF>=0.1	Before	3.0883289777122673	-0.344169	49510819	0.3914131974125067	2.3014290206977426e-88	4.9981034601674884e-86	93.21582973062853	96.63386107545287
CD16_Mono	PABPC1	VAF>=0.1	Before	2.0446709053116923	0.29285456015348466	1.15114e+07	0.6703600357116423	1.325048125716424e-88	7.63686390917716e-86	99.59448499594485	98.37725281826668
CD4_TCM	GIMAP5	VAF>=0.1	Before	0.5226772867051572	-0.298159	11166826.73803711	0.35117298181014317	1.1970015414757556e-87	4.8478562429768103e-85	58.32775919732441	76.29995298542548
CD16_Mono	PLAUR	VAF>=0.1	Before	1.2784602662086082	0.47873507284618655	1.14302e+07	0.6656332687339517	1.0840183433836462e-87	6.016301805779236e-85	83.04947283049474	67.43017160910462
CD8_TEM	IER2	VAF>=0.1	After	1.2364929453691267	0.2993342901842694	20493364.981445312	0.627838	2.921678752899057e-87	8.419491560036993e-85	88.74887488748875	78.14159292035399
NK_CD56low	MT-ATP6	VAF>=0.1	Before	2.8141176838689277	0.28979388747639767	76871882.396484375	0.6077190781256544	4.355439895998059e-87	9.192431949511398e-85	99.96674426338544	99.1466
CD8_Naive	ZFP36	VAF>=0.1	Before	2.2908274040031213	1.4022583500842467	1195205	0.8517418161294369	1.907956688456213e-88	9.530243658838785e-85	93.65671641791045	66.32925897631779
CD14_Mono	S100A8	VAF>=0.1	After	4.467445414657755	0.2572515698374067	1.88687e+08	0.5760011897051474	2.268723635433259e-86	1.6747203781757333e-84	99.90429095549528	99.81436827802656
CD4_TCM	IER2	VAF>=0.1	Before	1.1259901960153462	0.4068042382270074	20581572.58959961	0.6472467412798848	1.528086659588812e-86	5.871379126650859e-84	78.32775919732441	65.7029
CD8_TEM	EEF2	VAF>=0.1	After	1.6160474103541158	0.2850797966919141	20512105.661132812	0.6284118913940248	2.5675080976883827e-86	7.259265819596305e-84	98.24482448244825	90.04084411164057
CD8_Naive	PPP1R15A	VAF>=0.1	Before	1.5551766343433961	0.9871291542225181	1.17194e+06	0.8351656300240585	2.7249739389130313e-87	1.0208433618652944e-83	91.4179	49.5607
B	JUN	VAF>=0.1	Before	2.0816837101434063	0.9249946326592844	5.77976e+06	0.728867	1.1182034363674908e-86	1.1968770352833464e-83	92.55150554675119	70.44640725710192
Platelet	MYADM	VAF>=0.1	Before	0.5273788853985213	0.33806319427243736	2.96043e+06	0.6983828900429395	6.376981048534747e-87	1.3651294430327598e-83	62.0253	21.234485072123448
CD8_TEM	IER2	VAF>=0.1	Before	1.476591316843265	0.5654872062573757	7.49074e+06	0.7056503614474628	2.7585158073177996e-86	2.296464409592068e-83	88.93178893178893	76.5993
CD16_Mono	H3F3A	VAF>=0.1	Before	2.313145011971539	0.2762569098769059	11470389	0.6679708252817044	6.4243985028166906e-86	3.43820041302529e-83	99.7567	99.02347957205428
CD4_Naive	DUSP1	VAF>=0.1	Before	1.733076440266048	0.4458541778043421	32970909.12109375	0.6373631361510222	4.7572545377434526e-86	3.564372962404282e-83	93.49411104879417	78.47171957398407
B	HLA-A	VAF>=0.1	After	2.59967	0.3184961905794119	12028800	0.6680701798037844	4.025741100324067e-86	1.2065146077671229e-82	100	99.65046946747995
CD16_Mono	TAGAP	VAF>=0.1	Before	0.6861973937493254	0.3216434553784716	11122180	0.6476930951105204	1.0500789173366936e-84	5.426011233203571e-82	63.017031630170315	38.90285057801393
CD4_TCM	HSPA8	VAF>=0.1	After	2.078157932677606	0.3702508340367032	12978415.57421875	0.6744480997271296	4.9216358554533685e-86	7.375071329396873e-82	99.46332737030411	95.48570764582848
CD4_TCM	TXNIP	VAF>=0.1	Before	1.7020420483451844	-0.337194	1.1128e+07	0.3499520464115615	2.273143726564546e-84	8.308063107943834e-82	95.7191	97.54113775270334
CD4_TCM	BTG2	VAF>=0.1	Before	0.8617646141702466	0.34823019632105534	20330597.14892578	0.6393540967596354	1.3275673968928014e-83	4.736570819628245e-81	68.89632107023411	50.43253408556653
CD16_Mono	SRSF5	VAF>=0.1	Before	1.0993561747937963	0.34213798408539775	11338738.553222656	0.6603042450478024	5.586817750898288e-83	2.7906154665736947e-80	88.72668288726683	72.90155812450635
CD8_TEM	SERTAD1	VAF>=0.1	Before	0.6253760005551652	0.3839518354473844	7051291	0.6642527149773526	4.090551339536323e-83	3.0648455911475897e-80	55.08365508365508	27.71922119748207
CD16_Mono	ACTB	VAF>=0.1	Before	4.1582310445813855	0.3544553925641445	11422914	0.6652061487803016	1.1365486164529766e-82	5.493929360499308e-80	100	99.91383643282832
CD16_Mono	HLA-DQB1	VAF>=0.1	Before	0.46816588892607824	-0.401216	5823409	0.3391225280749332	1.392555456325391e-82	6.5210760978237455e-80	47.12084347120843	68.93803403460903
CD16_Mono	DDX5	VAF>=0.1	Before	1.3677490455688797	0.3217443492947829	11368004.169921875	0.662009	2.2425013046609634e-82	1.0182994560710466e-79	94.64720194647201	86.7954
NK_CD56low	CALR	VAF>=0.1	Before	1.1731576352394946	0.25682102571455345	76217485.49902344	0.6025456718442513	7.274914943615447e-82	1.4157740315594476e-79	84.66910542068507	73.69134217657965
CD8_TEM	KLF6	VAF>=0.1	Before	1.8431043454930907	0.5530329457544876	7.46271e+06	0.7030097573575834	3.050811446149841e-82	2.1769718819312078e-79	94.46589446589446	86.55394524959742
NK_CD56low	HSPA8	VAF>=0.1	Before	1.7655670809067177	0.26030079553589847	76358763.97705078	0.6036625643119412	1.9290258800253257e-81	3.705955488740962e-79	97.77186564682407	91.6393
B	HLA-DQA2	VAF>=0.1	After	1.2105312973516722	0.488348	1.18029e+07	0.6555247862101002	1.8675643191231126e-82	4.664241887009974e-79	72.6094	51.2919
B	CD74	VAF>=0.1	After	4.665131923716929	0.2742548223875101	1.1965e+07	0.6645267497437143	2.3148988015097535e-82	4.955536934374808e-79	99.10858995137764	99.10218627921321
CD8_Naive	RGS1	VAF>=0.1	Before	0.45344575893567146	0.3795700104631801	950680	0.6774850204668027	3.5101648386588235e-82	1.0519964021460494e-78	42.91044776119403	7.906799083269672
CD8_TEM	BTG2	VAF>=0.1	Before	0.8483910417229521	0.454675	7.20673e+06	0.6788955810694941	3.238404222439852e-81	2.2057948760573266e-78	66.15186615186616	38.4204
CD16_Mono	NFKBIZ	VAF>=0.1	Before	1.270181754615403	0.4210746432313839	11327990	0.6596783098709986	1.0018862337575839e-80	4.415666239075704e-78	85.40145985401459	70.0725
CD16_Mono	LILRB2	VAF>=0.1	Before	1.5354586664004921	0.36871221853533753	1.13594e+07	0.661507	1.4301736881357008e-80	6.123186490489565e-78	92.94403892944038	84.04537947871042
B	CD37	VAF>=0.1	After	2.823187942579454	0.30676038160274244	1.19273e+07	0.6624333098920795	1.8657998836934845e-80	3.494876407143358e-77	99.27066450567261	98.7184
CD4_TCM	SRSF7	VAF>=0.1	Before	1.0860608076702285	0.319112	20393672.622070312	0.6413376864134267	1.5410357569142898e-79	5.131649070524585e-77	83.87959866220736	73.56370474847202
CD16_Mono	HLA-DQA2	VAF>=0.1	Before	0.8083115279250787	0.3398270109814349	1.10278e+07	0.6421943442667772	2.4378622190939472e-79	1.0147601486978555e-76	66.66666666666666	36.77748258777914
CD8_Naive	FOSB	VAF>=0.1	Before	1.234782211551637	0.803531	1.13483e+06	0.8087198413965315	6.4320221725093965e-80	1.6063975375842217e-76	86.94029850746269	41.673032849503436
CD4_TCM	ICOS	VAF>=0.1	Before	0.5757495374285562	0.2703162225704982	1.979e+07	0.6223536376544287	5.3519247700180844e-79	1.743447666928717e-76	54.04682274247492	33.04654442877292
CD16_Mono	FTL	VAF>=0.1	After	4.347862547046729	0.4263969333953952	11488013	0.6586562167031541	6.131052652262846e-80	3.062460799805292e-76	100	99.75365780830099
B	CSRNP1	VAF>=0.1	Before	0.447247	0.3033575853410393	5.14928e+06	0.64936	4.997551346668732e-79	4.9925537953220636e-76	45.00792393026941	17.03668337709875
CD16_Mono	SRGN	VAF>=0.1	Before	2.0126843708081266	0.3034173982422548	1.13369e+07	0.6601993036218107	1.4719130285474303e-78	5.961247765617092e-76	99.51338199513383	97.70230487542185
CD4_TCM	MT-CO1	VAF>=0.1	Before	3.5014073976402207	0.276019	20499879	0.6446776514097297	2.52373085000796e-78	8.046405699440273e-76	100	99.88246356370475
CD14_Mono	CCL3	VAF>=0.1	Before	0.7526086101608217	0.3352024693035287	97542138.75292969	0.5795682233747044	1.0992580016689518e-77	1.2023635879568789e-75	41.495507060333765	28.393690291046436
CD8_TEM	JUN	VAF>=0.1	After	1.7103532155422334	0.4724523516106587	2.02875e+07	0.6215295985010346	5.256539059715892e-78	1.3350718272854684e-75	85.1935	73.43771272974813
CD16_Mono	MYADM	VAF>=0.1	Before	0.8566902027148872	0.3322684360242375	1.1169e+07	0.6504186672354999	4.402787171178487e-78	1.7362043621081483e-75	75.26358475263585	51.446829898757805
CD8_TEM	UBC	VAF>=0.1	Before	2.287753555432697	0.36194672726465726	7.41521e+06	0.6985345499838254	4.2994934634828427e-78	2.801213458708278e-75	99.74259974259975	98.4409
CD4_TCM	HLA-A	VAF>=0.1	After	2.9298242359887463	0.255195	1.28409e+07	0.6673012951815869	7.726417182914009e-79	3.859345382865547e-75	100	99.971
CD16_Mono	TMSB4X	VAF>=0.1	Before	3.661456332736719	0.2952425354710062	1.13294e+07	0.6597599835685914	1.8894999450894264e-77	7.260040173632065e-75	100	99.86357435197817
CD16_Mono	ARL4A	VAF>=0.1	Before	0.6267230425197777	0.283071	10995686	0.6403267972828544	2.6030660235627025e-77	9.751736090771775e-75	62.36820762368208	38.62999928197027
CD16_Mono	TMEM176B	VAF>=0.1	After	1.017884881626872	0.37801514013766013	1.13183e+07	0.6489262276058286	4.2367490152552326e-78	1.5871920998399916e-74	76.65130568356375	53.33681696028665
B	KLF6	VAF>=0.1	Before	1.289495157618771	0.5694895172101531	5636299	0.710776	2.5211268556838094e-77	2.3611928707763678e-74	86.84627575277337	59.31407654969364
CD8_Naive	TNFAIP3	VAF>=0.1	Before	1.6293574573261047	1.0212309947474005	1.14492e+06	0.8159060265897403	1.531374333714624e-77	3.2782349129590917e-74	89.92537313432835	49.86631016042781
CD8_TEM	TNFAIP3	VAF>=0.1	Before	1.259956252206225	0.5688388119017349	7.29682e+06	0.6873826112956548	5.734036318187425e-77	3.580188926168273e-74	79.92277992277992	52.92782901478553
B	YPEL5	VAF>=0.1	Before	0.9710944708413757	0.5439960660250109	5525108	0.6967545241183958	4.329452607182236e-77	3.786684876243834e-74	70.20602218700476	42.36492400732076
B	CDKN1A	VAF>=0.1	Before	0.4241894179687572	0.30139325176259946	5.01088e+06	0.6319063575179983	4.5485704219145145e-77	3.786684876243834e-74	38.193343898573694	12.779501869976922
CD16_Mono	RPS19	VAF>=0.1	Before	3.095965099017105	0.35224249839159505	1.13143e+07	0.6588833234305795	1.1743131429837735e-76	4.291971328685816e-74	99.91889699918897	98.98757808573275
CD4_TCM	CSRNP1	VAF>=0.1	After	0.4846246777573059	0.28290690862733137	1.20099e+07	0.6241164846508468	1.8210561127077854e-77	6.822131462231541e-74	45.08050089445438	22.734138972809667
CD4_TCM	MT-CYB	VAF>=0.1	Before	2.8965460869723025	0.2785125525810983	20427761	0.6424096934932773	5.0063548575029604e-76	1.531025051830242e-73	100	99.67089797837329
NK_CD56low	DUSP2	VAF>=0.1	Before	0.8759570362455084	0.26418684685279925	7.49374e+07	0.5924261900041466	1.5771733596795933e-75	2.7165451488274375e-73	63.18589956767542	46.438929301573715
CD4_Naive	TXNIP	VAF>=0.1	Before	1.6308373980103463	-0.310423	1.91627e+07	0.37043514063255994	5.727869861752462e-76	3.731831733841767e-73	97.70050476724622	98.85913211319064
CD8_TEM	TUBA1A	VAF>=0.1	After	0.7669876808211865	0.2502038561560739	20018636	0.6132938821451921	2.324109475898422e-75	5.709308278088173e-73	68.36183618361837	52.14431586113002
CD4_TCM	TSC22D3	VAF>=0.1	Before	1.8244318207110528	0.41187528709148036	20384133.685546875	0.641038	2.7255050912150574e-75	8.168338758371526e-73	93.4448	87.25905030559473
CD4_Naive	TUBA1A	VAF>=0.1	Before	0.915881	0.3128027946650699	32215523.955566406	0.622761	1.4978714426665024e-75	9.352334820148975e-73	74.98597868760515	54.87195395167683
CD16_Mono	MTRNR2L12	VAF>=0.1	Before	1.9653910535914203	0.5140729017054881	11268179	0.6561952542369723	7.634427525485953e-75	2.7238546778430236e-72	97.97242497972425	82.55905794499893
B	UBC	VAF>=0.1	Before	1.963919352390988	0.4867962960962635	5.66382e+06	0.7142465040315762	1.0098070718897736e-74	7.964188932772768e-72	98.09825673534073	92.6156
CD16_Mono	H3F3A	VAF>=0.1	After	2.2439577448701007	0.2666489929027578	11390597	0.6530709467346788	5.289476767947933e-75	1.5852561873539956e-71	99.84639016897081	98.96984174380412
CD16_Mono	SARAF	VAF>=0.1	Before	1.1103250423612527	0.30934584546614485	11192025.323242188	0.6517604931916274	5.5650513772650714e-74	1.9393556950771416e-71	89.37550689375506	75.22079414087743
CD16_Mono	PSAP	VAF>=0.1	Before	2.8308799568657874	0.35095679572934335	1.12633e+07	0.655909	6.300965876364998e-74	2.145908492212034e-71	99.59448499594485	98.47777697996698
CD8_Naive	EIF1	VAF>=0.1	Before	2.6285342491159853	0.6277036870378203	1.16131e+06	0.8275874970069439	9.062087277619928e-74	1.697442223189183e-70	100	99.46524064171123
Platelet	DUSP1	VAF>=0.1	Before	1.4034386229440106	0.5889469315809274	3125104	0.7372298348990395	2.3529501846000087e-73	4.4073698145288916e-70	93.24894514767934	71.22889410712288
CD16_Mono	FCER1G	VAF>=0.1	Before	2.6596618183347718	0.35136468894608486	1.1236e+07	0.6543225243945213	1.71707675021303e-72	5.71786557820939e-70	98.94566098945661	96.09391828821713
Platelet	ZFP36	VAF>=0.1	Before	1.3770644656277562	0.5568913615114455	3.12231e+06	0.7365713041480242	4.1994568498591137e-73	6.992095655015424e-70	94.09282700421942	75.98121435759812
NK_CD56low	JUN	VAF>=0.1	After	1.3963769063586418	0.2643287979113731	168845739.60546875	0.5699858760298311	8.397600809345742e-71	4.112354513988429e-69	77.51038781163435	68.09850641500604
CD16_Mono	ASAH1	VAF>=0.1	Before	1.354818390859413	0.320546	11183872.099609375	0.6512856953867129	1.3993286651785705e-71	4.5584652277610604e-69	92.13300892133009	82.04925683923314
B	RPS3A	VAF>=0.1	After	3.3490421865337567	0.2543368647841304	1.17723e+07	0.6538260080618511	2.7703734792814777e-72	4.6126718430036604e-69	99.91896272285251	99.79439380439997
CD8_TEM	CD69	VAF>=0.1	Before	1.3426350989327003	0.5392622942935136	7267147	0.6845869961811991	2.1357611260592297e-71	1.2801752189599021e-68	84.68468468468468	62.88244766505636
CD16_Mono	CHMP1B	VAF>=0.1	Before	0.6247086834826899	0.3022236698272437	10843830	0.6314835594777566	5.518889171478204e-71	1.7229282132208517e-68	57.33982157339822	35.61427443096144
CD16_Mono	PFN1	VAF>=0.1	Before	2.7031860159418066	0.2734891899129388	1.12004e+07	0.6522480998272128	1.1804027894132925e-70	3.6098644488486096e-68	99.83779399837795	99.28197027356933
B	HLA-DRA	VAF>=0.1	After	3.2497577052984394	0.29557075452418813	11752260	0.6527113636689298	2.939514460356434e-71	4.404862418844116e-68	98.05510534846029	97.7589
CD16_Mono	FCGR3A	VAF>=0.1	Before	1.863180154898852	0.4899101639462482	1.11787e+07	0.6509862193615172	2.264589195880517e-70	6.78697382005391e-68	89.53771289537713	76.13269189344439
CD4_TCM	TUBA1A	VAF>=0.1	Before	0.9432168006331156	0.3371963948790784	20042622.124267578	0.6302978939127157	3.291516409946465e-70	9.13395803760144e-68	71.30434782608695	59.275975552421244
CD8_Naive	FOS	VAF>=0.1	Before	3.0154501768289204	1.4069960981865144	1.14946e+06	0.8191399524531658	7.537350952698445e-71	1.2549689336242911e-67	98.50746268656717	74.27425515660809
CD4_TCM	KLF6	VAF>=0.1	After	1.5468810795505463	0.44760781022657414	1.26343e+07	0.6565671150509879	1.108179362226305e-70	3.321213548592236e-67	91.23434704830053	78.05019753660237
CD8_TEM	LINC02446	VAF>=0.1	Before	0.9218943491205683	0.4616753360556006	7040151	0.6632032936380763	1.5669573707681075e-69	9.031098538830803e-67	64.73616473616474	36.18796662274923
CD16_Mono	CD83	VAF>=0.1	Before	1.1947536523354412	0.37860476112848385	11112352	0.6471207677665333	3.179388527828402e-69	9.162141747982423e-67	83.13057583130575	66.8773
CD4_TCM	RGCC	VAF>=0.1	After	0.9559632880743114	0.44913501323322014	1.24277e+07	0.64583	4.757504601939816e-70	1.188186774334469e-66	67.97853309481216	48.55914478270974
CD16_Mono	CCL4L2	VAF>=0.1	Before	0.3369409173884812	0.25454463319071263	9819685	0.5718431252380693	4.338517485886457e-69	1.2266544250190295e-66	21.005677210056774	7.108494291663675
CD4_Naive	YPEL5	VAF>=0.1	Before	0.8448750032981147	0.2880246139990543	31791341.33154297	0.6145608220598457	2.6864181051805937e-69	1.610239012245248e-66	69.60179472798654	47.13404335987316
CD4_TCM	H3F3B	VAF>=0.1	Before	1.9850292082054088	0.2562010322172257	20177354.471191406	0.6345349400427819	1.315600114673534e-68	3.5204049497112333e-66	98.19397993311037	98.14762576398684
CD4_TCM	MALAT1	VAF>=0.1	Before	3.443896616977087	-0.34672	11601161	0.3648318717932994	1.423799822801519e-68	3.7430947973124143e-66	100	99.9577
NK_CD56low	CCL4	VAF>=0.1	Before	1.9642207972296037	0.4820497049587116	75162702.11499023	0.5942069663802594	7.563193368574368e-68	1.0397656204411642e-65	87.16328566677753	83.14315599296343
CD8_Naive	NR4A1	VAF>=0.1	Before	0.4260900092035689	0.3600229795312996	926662	0.6603690153130451	1.327376755006999e-68	1.8082491521618073e-65	39.17910447761194	7.906799083269672
CD8_Naive	LMNA	VAF>=0.1	Before	0.6272258179646688	0.4923137966900031	988477	0.7044207438742118	1.4852478146548273e-68	1.8547032085502155e-65	52.98507462686567	14.667685255920551
CD8_TEM	DDX5	VAF>=0.1	After	1.7004205019065581	0.25058479315631743	2.00282e+07	0.613588	8.710684307797008e-68	1.948203050034898e-65	98.1998	92.59360108917632
CD8_TEM	SRSF2	VAF>=0.1	Before	0.8491063073245958	0.3865198826856974	7132808	0.6719318603376574	4.93888683834447e-68	2.7410821952811806e-65	73.23037323037323	50.22690674864588
CD16_Mono	ARHGDIB	VAF>=0.1	Before	1.705932116789039	0.26806597379282615	11119482.760742188	0.6475360230937803	2.230370405998531e-67	5.968232238194283e-65	97.5669	95.54821569612983
CD8_Naive	CD69	VAF>=0.1	Before	1.9440749503179335	0.9629087165953049	1.13463e+06	0.8085744643854829	1.9421248385552667e-67	2.238672361980821e-64	95.52238805970148	72.32620320855615
CD4_Naive	RPS26	VAF>=0.1	After	2.0396208941538014	0.43719535153146327	25722303.861328125	0.6286736687274528	6.22853908758626e-68	2.3333664556870026e-64	98.373	96.16466177159819
CD8_Naive	JUN	VAF>=0.1	Before	2.556901176520043	1.219961977863095	1.13761e+06	0.8106995342234588	2.433325691404882e-67	2.6045275346930113e-64	97.76119402985076	75.05729564553094
CD16_Mono	SAT1	VAF>=0.1	Before	2.925179727436832	0.3374732199143753	1.11242e+07	0.6478122135051201	1.2859116322440347e-66	3.3805940016099754e-64	99.91889699918897	99.11682343649028
B	HLA-DPA1	VAF>=0.1	After	2.47718	0.31216274826247803	1.1665e+07	0.6478644836346465	4.616773381307588e-67	6.289304465354019e-64	98.54132901134521	96.5184
CD4_Naive	H3F3B	VAF>=0.1	Before	1.9402371552022164	0.26642512923650874	32114725.301757812	0.6208121820293298	1.3252540205539288e-66	7.355159814074305e-64	99.60740325294447	97.6321
CD16_Mono	APOBEC3A	VAF>=0.1	After	1.0305233473210544	0.37798824841052314	1.11038e+07	0.6366268916277826	3.537765866748843e-67	7.573345930461631e-64	72.81105990783409	50.7764
CD8_TEM	TSC22D3	VAF>=0.1	Before	1.9946857434040959	0.5816784646231834	7.24125e+06	0.6821478451913234	2.8460601216246875e-66	1.5231503900909265e-63	97.16859716859717	82.90147855365247
CD4_Naive	CD69	VAF>=0.1	Before	1.5385193953910932	0.3866461297909165	32047028.399414062	0.6195035280936118	3.562520366350448e-66	1.9065845603486236e-63	92.20415030846887	72.60883052424775
CD8_Naive	KLF6	VAF>=0.1	Before	1.6450824185849067	0.8646587440556512	1.1263e+06	0.8026375238019224	1.9896817969227144e-66	1.9876921151257916e-63	94.77611940298507	65.54621848739495
CD4_TCM	ZFP36	VAF>=0.1	After	1.6217932180311732	0.6055863324247182	12520287	0.6506405752611752	1.0906454785429649e-66	2.3347603565666184e-63	81.932	69.66651173599814
CD4_TCM	ZNF331	VAF>=0.1	Before	0.6403777548258447	0.26743364704229805	1.95725e+07	0.6155120579018292	1.350091569177593e-65	3.371853694021039e-63	57.123745819397996	37.8514
CD4_Naive	RPS2	VAF>=0.1	After	2.1549367128433334	0.26611271669711734	25679643.58984375	0.6276310175898417	2.7525937335040375e-66	8.2495234193116e-63	100	99.35947508201843
CD16_Mono	LSP1	VAF>=0.1	Before	1.5760660307304755	0.30237126737518016	11069813.01953125	0.6446435372305547	6.273989773385047e-65	1.6209609785202574e-62	96.83698296836984	90.17017304516408
B	DDX5	VAF>=0.1	After	1.6490129751606184	0.3488243693479811	1.16187e+07	0.6452941840327628	1.6241911966088973e-65	1.8721926985526403e-62	96.92058346839546	87.06051675690493
CD4_Naive	JUNB	VAF>=0.1	Before	2.3252270048305532	0.45486041108696895	32060227.795898438	0.6197586866246575	3.6825933104972266e-65	1.902884853717274e-62	97.19573752103197	92.14834729259297
CD8_TEM	RPS27	VAF>=0.1	Before	3.5578862212598916	0.25403132933192074	7227859	0.680886	8.907514604270059e-65	4.4493035448328945e-62	100	99.79505196896501
B	MYADM	VAF>=0.1	Before	0.5966158770842944	0.37109226001729007	5157090	0.6503448962057823	8.162959715232162e-65	5.824854825369235e-62	50.079239302694134	23.012652184292193
CD8_TEM	LINC02446	VAF>=0.1	After	0.7271166998362868	0.2671457944589517	19501296	0.59744457767764525	3.081854928187426e-64	6.41411056929008e-62	53.960396039603964	36.46017699115045
CD4_TCM	EEF2	VAF>=0.1	Before	2.1927796205296053	0.2637991956933521	20020964.913085938	0.6296168206224458	1.3670211739286607e-63	3.1037594380789363e-61	99.86622073578594	97.69628584861307
Platelet	NFKBIA	VAF>=0.1	Before	1.0126746855625088	0.4516405956719588	3.03347e+06	0.7156132061895993	2.7352988814079678e-64	3.726223067081672e-61	87.76371308016878	60.05814603600581
CD14_Mono	S100A8	VAF>=0.1	Before	4.443815244469022	0.3167380106068949	9.91517e+07	0.5891314939332172	4.876307209921715e-63	3.8458665021408894e-61	99.74326059050064	99.82411316003851
CD14_Mono	CRIP1	VAF>=0.1	Before	1.8180467271036134	0.2930271921113903	9.90627e+07	0.588603	7.797150606339635e-63	6.085432387291637e-61	90.98202824133504	86.69369769680812
CD4_TCM	GIMAP4	VAF>=0.1	Before	0.6149642034713635	-0.259953	11880856.131347656	0.3736276895826601	3.880834899963262e-63	8.552104555286688e-61	64.54849498327759	77.79501645510109
CD16_Mono	PGK1	VAF>=0.1	Before	1.2136254973352745	0.28761099234919996	11007152.323730469	0.6409945313697444	4.6324386211371334e-63	1.176560893859999e-60	91.72749391727494	79.94542974079127
B	PCBP1	VAF>=0.1	After	1.2324429994538793	0.31180769081704107	11553332.436523438	0.6416630817871365	1.1940613337392145e-63	1.278072077577295e-60	91.24797406807131	76.17024192995683
Platelet	FOS	VAF>=0.1	Before	1.755729520931674	0.7109204593506133	3.07328e+06	0.7250031965221838	1.2902738586943968e-63	1.611229481044628e-60	94.51476793248945	74.15855976741585
CD16_Mono	FTH1	VAF>=0.1	After	4.2849507355827905	0.3316303601408892	1.11836e+07	0.641204	1.0474985326339024e-63	1.9620956889398785e-60	100	99.99253508510003
CD16_Mono	SGK1	VAF>=0.1	After	0.49902930123604056	0.2519983186613144	10646663	0.610418	1.3046272337753126e-63	2.1722043442358954e-60	45.775729646697386	25.53747387279785
CD16_Mono	FTH1	VAF>=0.1	Before	4.335723130359981	0.3145780819161068	1.10456e+07	0.6432342353312438	1.326231031258695e-62	3.312262000568591e-60	100	99.94973791914985
CD8_Naive	DUSP1	VAF>=0.1	Before	2.196035062774748	1.026945892659867	1.12192e+06	0.7995133433291906	3.607764677231667e-63	3.378897105519783e-60	97.01492537313433	71.94423223834988
CD16_Mono	LST1	VAF>=0.1	Before	2.709180828245893	0.3766920169605821	1.10403e+07	0.6429237296944775	2.004254618725473e-62	4.923566469114953e-60	96.7559	92.3171
CD16_Mono	ATP6V0C	VAF>=0.1	Before	1.6178208183462166	0.28125574762826555	11013152.092773438	0.6413439241130185	4.7459849339300745e-62	1.1470739392732608e-59	97.48580697485806	90.93128455518058
CD4_Naive	RPS19	VAF>=0.1	Before	3.1910991950846426	0.2548327981568277	31930014.904296875	0.6172415313756574	2.9605333463698063e-62	1.4787864065117182e-59	100	99.5037
CD4_Naive	HSPA8	VAF>=0.1	After	1.7411912959836775	0.27953585934760716	25517825.30029297	0.623676	8.838616740831592e-63	1.892095312305163e-59	99.68710888610764	94.57897203561943
CD14_Mono	S100A12	VAF>=0.1	Before	2.0712357425292427	0.3631991127904055	98895765.17578125	0.5876110945997479	2.749909280976683e-61	2.0299207180017532e-59	90.66110397946085	87.68606976227505
B	HLA-DQA2	VAF>=0.1	Before	1.3295115982155956	0.5765742613838993	5428491	0.6845704488285106	3.937567892053853e-62	2.682020675564863e-59	82.40887480190175	50.60077982016392
B	H3F3B	VAF>=0.1	Before	2.0522171718781212	0.4539784593685168	5.50247e+06	0.6939002824417383	1.8455213437230173e-61	1.2023972754647571e-58	98.8906	95.1142
CD14_Mono	S100A9	VAF>=0.1	Before	3.9215234660264513	0.30316262713588804	9.87977e+07	0.5870283319240164	3.45525076580235e-60	2.4773652021793404e-58	99.93581514762516	99.85003332592757
CD16_Mono	G0S2	VAF>=0.1	After	0.49570773355185477	0.3079873953528712	1.02519e+07	0.5877845611799657	1.9795367041294747e-61	2.9663357511380178e-58	30.798771121351763	14.257987458942967
CD8_TEM	ZNF331	VAF>=0.1	Before	0.4833251541318034	0.2833438393672161	6.66919e+06	0.6282573275326898	7.410334131544019e-61	3.470120530037098e-58	45.30244530244531	21.431708388230128
Platelet	EIF1	VAF>=0.1	Before	2.5932839646115733	0.48224470281522613	3.06978e+06	0.7241779983967849	3.0233739996125592e-61	3.485019952630323e-58	100	99.76517946997652
CD16_Mono	VIM	VAF>=0.1	Before	2.44982	0.28464133297377137	1.09984e+07	0.6404866797332935	1.7598139659439063e-60	4.185843218995149e-58	99.83779399837795	99.10246284196165
CD4_Naive	GIMAP7	VAF>=0.1	Before	0.7623126035566484	-0.261131	19972577.02734375	0.38609139603680376	1.0669614217535276e-60	4.996380282805191e-58	72.46214245653393	80.62937303967188
CD16_Mono	ZFAND5	VAF>=0.1	Before	1.004742673582174	0.29741466138650996	10911191.357910156	0.6354063054138659	8.500246027235089e-60	1.9299422230017848e-57	81.10300081103001	67.16450061032528
CD16_Mono	TMEM176A	VAF>=0.1	After	0.6463644244976525	0.2650501598002689	10830584	0.6209630405297865	1.6905161877767907e-60	2.3029440976213824e-57	59.523809523809526	38.03374141534787
Platelet	PPP1R15A	VAF>=0.1	Before	0.8488742939062257	0.44942235776102907	2948928	0.6956689129607061	2.2405297146228343e-60	2.3981669838302266e-57	76.37130801687763	37.38119199373811
CD4_Naive	ACTB	VAF>=0.1	After	3.3134077985504313	0.2543993381117877	2.54577e+07	0.6222065754940121	1.301466265712335e-60	2.4378089989624174e-57	100	99.98437744102485
CD8_Naive	H3F3B	VAF>=0.1	Before	2.176778158934599	0.6099633777444791	1.11428e+06	0.7940738201657868	3.769897151044804e-60	2.973258358337178e-57	100	96.29488158899923
CD16_Mono	LGALS1	VAF>=0.1	Before	2.0162818041304256	0.339004	10972303	0.6389651031147174	2.2955660755880953e-59	5.0586849474540604e-57	97.32360097323601	92.97048897824371
CD16_Mono	RAP1B	VAF>=0.1	Before	1.3403549840375149	0.2765525505811788	10939038.591796875	0.6370279714097727	2.9216627690048197e-59	6.345089361382206e-57	95.21492295214922	85.87635528110864
CD16_Mono	RPS3A	VAF>=0.1	After	2.4292529109403866	0.2835048424162139	1.10994e+07	0.6363749077492468	9.551910648277086e-60	1.1927948422036012e-56	99.9232	98.81307853090475
Platelet	MTRNR2L12	VAF>=0.1	Before	2.612613763578638	0.8258060937131104	3.05643e+06	0.7210293650692549	1.2930345294856969e-59	1.2917414949562113e-56	100	85.47467292854746
B	FCMR	VAF>=0.1	After	1.2380220205525028	0.3218220803237515	11467095	0.636874	1.5580323797714627e-59	1.4591947006797105e-56	86.54781199351702	74.2238
NK_CD56low	CD3E	VAF>=0.1	Before	1.1668803338820612	0.27370261535076246	73861771.41699219	0.5839223163906178	1.4790864543711627e-58	1.6919168334925095e-56	72.79680744928501	54.51433461703038
CD4_TCM	DDX5	VAF>=0.1	Before	1.6799695518649393	0.2684223521519773	19838105.514160156	0.6238662809320571	1.11838942305104e-58	2.2957623978657305e-56	97.85953177257525	93.02303714151387
CD4_TCM	SRGN	VAF>=0.1	Before	1.2101975902858657	0.2749088704469088	19791584.958496094	0.6224033082692534	1.2110115759409656e-58	2.4522984412804556e-56	84.01337792642141	78.44381758345087
Platelet	ZFP36	VAF>=0.1	After	1.2587340238231606	0.42111175121953337	3.88481e+06	0.6803145007635298	1.1912589298601122e-59	2.9751691773256303e-56	89.6104	74.72087378640776
CD16_Mono	RPL41	VAF>=0.1	Before	3.3846720021497987	0.34489602509666994	10954240	0.6379132157709609	3.33395759738444e-58	7.137050656686549e-56	99.91889699918897	98.99475838299706
CD4_TCM	EIF1	VAF>=0.1	After	2.3542530776579773	0.26684325869668646	12388147	0.6437736683272518	6.552709776897952e-59	1.2274044500851976e-55	99.91055456171736	99.36091099233093
Platelet	ID2	VAF>=0.1	Before	0.533509	0.279196	2855977	0.6737412425907918	1.9379634447428688e-58	1.815023888716993e-55	65.18987341772153	26.44526445264453
CD4_TCM	PPP1R15A	VAF>=0.1	After	0.9927325133889311	0.40074544108424315	12196761	0.6338279300916239	1.6863924122246347e-58	2.807843366354017e-55	66.63685152057245	49.041366488496394
CD8_TEM	ID2	VAF>=0.1	Before	1.0013872801555805	0.38593473097456643	7038527	0.6630503079778443	9.595950237956456e-58	4.357433767144772e-55	78.8932	60.27667984189723
CD8_TEM	CD8B	VAF>=0.1	After	1.455553169764081	0.2711812769946129	1.97107e+07	0.6038589750738178	3.216482517618872e-57	5.6704694737080935e-55	85.77857785778578	78.34581347855683
CD4_TCM	MT-ND3	VAF>=0.1	Before	1.665511857152168	0.25984726052907914	19783453.989257812	0.6221476065574423	3.069825396174717e-57	5.897606866881812e-55	97.25752508361204	94.12317818523742
CD8_TEM	TUBA1A	VAF>=0.1	Before	0.9469596385199857	0.40327623062056406	7008239	0.6601970877333196	1.8297804000366882e-57	8.064488027808757e-55	73.4878	54.494217537695796
CD8_TEM	COTL1	VAF>=0.1	Before	0.8332769740665252	0.3629778133646296	6.95385e+06	0.6550733398559485	2.0668794802243398e-57	8.849196860331924e-55	70.14157014157014	44.77382520860782
CD4_Naive	GIMAP7	VAF>=0.1	After	1.1662807494591148	0.29015863118523555	25232437.787109375	0.6167009502756183	8.662320171300101e-58	1.442276308521467e-54	86.23279098873591	73.71895016403687
CD16_Mono	LILRB1	VAF>=0.1	Before	0.9197733440490294	0.29099820542678134	1.08284e+07	0.6305832270701749	8.507827387281047e-57	1.7464355260055683e-54	78.42660178426601	62.31779995691822
CD8_Naive	EGR1	VAF>=0.1	Before	0.34209970387811917	0.28681307044939186	887964	0.632792	2.43772977336881e-57	1.826469032696581e-54	32.46268656716418	6.359816653934301
CD8_TEM	RPS18	VAF>=0.1	Before	3.0721626782837537	0.2565682193067995	7099950	0.6688365384017558	9.894730798883549e-57	4.007365973547837e-54	100	99.71453667105841
B	DDX5	VAF>=0.1	Before	1.7099820311223661	0.44144914411556546	5438141	0.6857873809061718	6.900087202754967e-57	4.308241947220133e-54	96.03803486529318	87.10909524946288
CD4_TCM	DNAJB1	VAF>=0.1	Before	1.111488312727858	0.30375945983817343	19677730.535888672	0.6188228285128039	2.370094558412872e-56	4.4956793617489736e-54	79.66555183946488	69.0691
CD16_Mono	KLF4	VAF>=0.1	Before	0.9889949079756599	0.29381811328320606	10832011	0.6307952875120887	4.115683223519287e-56	8.223135080591536e-54	79.80535279805353	63.96208803044446
CD16_Mono	H3F3B	VAF>=0.1	After	2.1131652956963305	0.25762942105370734	1.10307e+07	0.6324343844300452	1.0652529744687755e-56	1.0641877214943068e-53	99.84639016897081	99.08181546730367
B	ARL4A	VAF>=0.1	Before	0.6113033741354662	0.34807311490610354	5.15925e+06	0.6506169719526791	2.502796495815214e-56	1.5001762195916393e-53	54.83359746434231	29.044322431765735
CD4_TCM	RPL41	VAF>=0.1	After	4.129629458055195	0.3903110444433753	12335912	0.6410591770021914	1.8262666611308266e-56	2.7366605917045438e-53	100	99.97676039972112
CD4_TCM	LMNA	VAF>=0.1	After	0.5492130536649696	0.2970860002992175	11684491	0.6072068432515983	3.3383986046065477e-56	4.547809371820829e-53	43.38103756708408	24.08203578898443
CD4_TCM	FOSB	VAF>=0.1	After	0.6498602042637881	0.30818757547983266	11910427	0.6189480380830115	3.8733155409730045e-56	4.83680278179004e-53	53.577817531305904	33.41854520102254
B	PTPRC	VAF>=0.1	After	1.5038599715487597	0.2982609511975596	11405367.570800781	0.6334452284311926	7.210508001516102e-56	6.002747911262155e-53	94.16531604538088	86.67671852511822
CD4_TCM	EEF2	VAF>=0.1	After	2.166260304205694	0.29722090167992277	1.23126e+07	0.6398479461652476	7.425099452001704e-56	8.558855022172732e-53	99.82110912343471	96.57796885893562
Platelet	DUSP1	VAF>=0.1	After	1.2356192265323316	0.4444515467580159	3.8462e+06	0.6735527080794071	1.2704201952949258e-55	2.7196066609277806e-52	84.7042	66.84466019417475
CD16_Mono	SMIM25	VAF>=0.1	Before	1.4831777994634605	0.35851953147717164	10853958	0.6320733571313891	1.4561749223178337e-54	2.8338676897315242e-52	88.72668288726683	76.20449486608746
Platelet	CXCR4	VAF>=0.1	After	0.6543644047501126	0.2986487227354522	3730618	0.6533115482144608	3.160675120091314e-55	5.920339584321043e-52	67.67676767676768	33.980582524271846
CD16_Mono	EEF2	VAF>=0.1	Before	1.3947372425096667	0.2547821666281809	10836718.28515625	0.6310694132763202	3.466595384674676e-54	6.659863056326926e-52	95.78264395782644	89.24391469806851
B	LAPTM5	VAF>=0.1	Before	1.9897388320851606	0.40642850730034463	5.40889e+06	0.6820981851065925	2.180716677367773e-54	1.2568476696290799e-51	98.8906	94.66061908172198
CD8_TEM	SLC2A3	VAF>=0.1	Before	0.7375647227800464	0.3321607237973305	6.88441e+06	0.6485321666481086	4.6635677321459475e-54	1.7918862170822314e-51	66.15186615186616	43.47826086956522
B	IER2	VAF>=0.1	Before	1.1380776663089467	0.5040184045670831	5339783	0.6733837534145033	5.2080124275312737e-54	2.890446897279857e-51	76.2282	57.00644545237527
B	CHMP1B	VAF>=0.1	Before	0.445519	0.28529044121408653	4959536	0.6254319635974631	1.2934922748166136e-53	6.922493477902484e-51	41.679873217115684	18.47696347576987
CD8_TEM	GNLY	VAF>=0.1	Before	1.6656417943265527	-0.76833	3573739	0.33665690912067725	2.086926202169036e-53	7.818147284875751e-51	68.08236808236808	83.48704435660957
CD8_Naive	NFKBIA	VAF>=0.1	Before	1.483285293004252	0.7582798628322461	1079590	0.7693508203824271	1.2511217555462072e-53	8.927647384219006e-51	89.92537313432835	64.34300993124522
CD16_Mono	MAP3K8	VAF>=0.1	Before	0.7975143793375936	0.2629769460499095	10703233	0.6232959823936549	9.852114452764629e-53	1.8004138423741215e-50	71.37064071370641	54.160982264665755
CD8_TEM	YPEL5	VAF>=0.1	Before	0.762795	0.343789	6.86977e+06	0.6471524696162377	8.815416693821138e-53	3.2219272965099943e-50	64.6075	43.92475479432001
CD16_Mono	PCBP1	VAF>=0.1	After	1.1787434121435212	0.26689321881379535	10917000.55078125	0.6259176657028355	5.450322117552497e-53	4.804298643030833e-50	93.16436251920123	78.5234
CD16_Mono	RPL41	VAF>=0.1	After	3.294125227544834	0.39776398699698445	10954127	0.6280462815550324	9.797460377589384e-53	8.156385764343162e-50	100	99.12660495670349
Platelet	TXNIP	VAF>=0.1	Before	1.3021727924090258	-0.496239	1.24171e+06	0.29292587229669764	9.455812057074263e-53	8.335020216191637e-50	95.78059071729957	98.47925751984793
B	SLC2A3	VAF>=0.1	Before	0.7087018161322935	0.37416482425355363	5.15815e+06	0.6504785065204229	1.7678310223255593e-52	9.134809610189141e-50	58.795562599049134	32.36253680273733
CD4_TCM	MYADM	VAF>=0.1	After	0.6480481333063232	0.2761321530891113	11913541	0.6191098630277083	1.4810645044649137e-52	1.4795834399604489e-49	57.960644007155636	38.34534046014409
B	CXCR4	VAF>=0.1	Before	1.6090531331115137	0.5218160730425201	5367878	0.6769267282043366	3.180561038024292e-52	1.5886902384931338e-49	88.58954041204437	74.8627
CD4_Naive	IER2	VAF>=0.1	Before	0.9363343798189638	0.2576328591435171	31154867.30859375	0.6022570946177037	6.720027416902822e-52	2.9617532600673174e-49	80.87492989343804	65.53613897218489
CD16_Mono	CD68	VAF>=0.1	Before	1.7076174641524984	0.317527	1.07952e+07	0.6286495549642438	2.2814616119498774e-51	3.975314215705688e-49	90.75425790754258	83.98075680333166
CD16_Mono	VIM	VAF>=0.1	After	2.399528862664222	0.25776541635607453	10932325	0.6267962809816902	6.907443870763574e-52	5.447791915968008e-49	99.9232	99.21618393550314
CD4_TCM	UBC	VAF>=0.1	After	2.041	0.2572103679644633	12199341.665039062	0.6339620392686397	1.5248747728395493e-51	1.344132263000038e-48	99.82110912343471	97.70508947246107
CD4_TCM	MT-ATP6	VAF>=0.1	After	2.4423516713545843	0.3393252468379222	12204614	0.6342360262029612	1.97410941106204e-51	1.6434460847091484e-48	99.82110912343471	97.73413897280967
CD8_TEM	SRSF7	VAF>=0.1	Before	1.175616636680888	0.36636885206816194	6.95857e+06	0.6555183547937171	9.061333847536173e-51	3.157769481519292e-48	84.94208494208493	72.86634460547504
CD8_Naive	RGCC	VAF>=0.1	Before	1.4170431846718898	0.8667654791231478	1.06005e+06	0.7554270520962795	5.11562492143601e-51	3.332940845552983e-48	79.8507	53.32314744079451
CD4_TCM	RPS26	VAF>=0.1	After	2.1437609490374365	0.42363627365828194	12174889.576171875	0.6326913398695857	9.501085428252084e-51	7.493356060124078e-48	98.65831842576029	94.9338
CD16_Mono	HSP90AA1	VAF>=0.1	Before	1.2691746789626681	0.2729254336114254	10732928.645507812	0.6250252894674714	7.409299866294238e-50	1.2475096460271817e-47	91.8897	83.7079
CD8_TEM	DDX5	VAF>=0.1	Before	1.7935329330564243	0.3479286063977427	6.97527e+06	0.6570915447727042	7.781874383549661e-50	2.4810933539891844e-47	98.97039897039896	91.90455277411799
CD8_Naive	TUBA1A	VAF>=0.1	Before	1.2606322687735187	0.657991	1061055	0.7561421787168056	4.370209231977183e-50	2.7286493892157537e-47	86.19402985074626	57.83040488922842
CD4_Naive	MT-ATP6	VAF>=0.1	Before	3.110868524073514	0.3809528340574446	31272842	0.6045376722937688	7.163753275061219e-50	3.067109795051211e-47	99.83174425126192	98.94874711336298
CD8_Naive	TSC22D3	VAF>=0.1	Before	2.136179116824859	0.7870534776761766	1.07651e+06	0.7671534183551304	5.336296403840271e-50	3.198576064461858e-47	97.76119402985076	85.88617265087854
CD4_Naive	EEF2	VAF>=0.1	After	1.9438441394547512	0.2566568975824062	24977998.876953125	0.6104822599134602	3.217727483546618e-50	3.2145097560630714e-47	99.87484355444305	97.24261834088423
CD4_TCM	TNFAIP3	VAF>=0.1	After	1.0336886996046755	0.39070296741270205	12000262	0.6236164850665821	6.595539963559386e-50	4.94170831769687e-47	67.62075134168157	49.52939809435278
Platelet	CXCR4	VAF>=0.1	Before	0.6564053528803461	0.31349314163063063	2.83929e+06	0.6698057458134996	6.705653475210329e-50	5.582456518112599e-47	70.0422	32.12568489321257
CD16_Mono	MT-ATP6	VAF>=0.1	Before	2.713066433934966	0.3147289779715967	10754766	0.626297	3.674584201240417e-49	5.98517872343344e-47	100	98.76498887053924
B	HNRNPA1	VAF>=0.1	After	1.5879496444578316	0.26557736834563395	11261408.321289062	0.6254498438786428	1.9887080235879016e-49	1.2956865101506393e-46	96.5964	90.78884243711876
B	CD79A	VAF>=0.1	After	2.2917334459493977	0.28579180505380775	1.12723e+07	0.6260525654288123	2.8663511337156282e-49	1.7896779891136955e-46	94.89465153970826	91.96079775203893
CD8_Naive	FTH1	VAF>=0.1	Before	2.6647865185042594	0.533422	1.07501e+06	0.7660858950092927	3.2053744689018392e-49	1.847405246788233e-46	100	99.44614209320092
CD4_TCM	DDX5	VAF>=0.1	After	1.6521778418691957	0.2917191294702206	12132782.463867188	0.6305031635304563	2.77714112921624e-49	1.891611810059334e-46	97.67441860465115	90.6344
CD8_TEM	GZMB	VAF>=0.1	Before	1.2204645559981018	-0.411763	3652054	0.3440344164981846	6.7637012665201705e-49	2.1115429891417657e-46	82.62548262548263	89.899
CD16_Mono	SAMSN1	VAF>=0.1	Before	0.8007755454416674	0.27219976411016655	1.0592e+07	0.6168177295224532	1.6846465493559052e-48	2.657308267589288e-46	68.04541768045418	49.4148
B	HNRNPDL	VAF>=0.1	After	1.2805627905295234	0.2519729237081363	11235996.530273438	0.6240384928051403	4.547316189468261e-49	2.7256613239672755e-46	92.13938411669368	83.71598930847783
CD8_TEM	IFNG	VAF>=0.1	Before	0.595899	0.3376170458255621	6588107	0.6206193959817148	1.0952255487409286e-48	3.282390969576563e-46	46.71814671814672	25.157370809544723
B	HNRNPK	VAF>=0.1	After	0.9902988193769693	0.2524455103964127	1.12023e+07	0.6221679449180335	5.9825925211456244e-49	3.4480441895910453e-46	84.03565640194489	69.28928791720924
CD8_Naive	YPEL5	VAF>=0.1	Before	1.179855268191614	0.6692560211186549	1.04514e+06	0.7448031281712142	9.121508595717585e-49	5.0624372706232595e-46	81.71641791044776	47.19251336898396
CD4_TCM	RGCC	VAF>=0.1	Before	0.9753868474000055	0.3354046775509195	19306866.63330078	0.60716	3.608398885479608e-48	5.5175364590726455e-46	68.49498327759197	57.226140103432066
CD4_TCM	YPEL5	VAF>=0.1	After	0.7481446699552927	0.29310570877366765	1.19153e+07	0.6192012987984835	1.1085785818597605e-48	7.222630456160221e-46	63.864042933810374	45.93306995119684
B	JUND	VAF>=0.1	Before	0.5231248432975764	0.2857903875862265	5.0425e+06	0.6358942376311465	1.9988097098319982e-48	9.360051094322654e-46	51.03011093502378	26.983369141402086
CD8_Naive	JUNB	VAF>=0.1	Before	2.8214770990181774	0.9460880770862505	1072128	0.7640331573606376	1.8126294971395035e-48	9.700804648084093e-46	98.88059701492537	90.16424751718868
B	ZNF331	VAF>=0.1	Before	0.6781597006366961	0.36612693523946654	5.06157e+06	0.6382985927599225	3.548285032200873e-48	1.61124397598576e-45	53.09033280507131	28.423649240073207
CD16_Mono	HLA-DRB5	VAF>=0.1	After	2.0068964978660837	0.40051270747303813	10847055	0.6219073923985838	3.2473387303928616e-48	2.2118804943153197e-45	98.38709677419355	86.57061809495372
CD16_Mono	VSIR	VAF>=0.1	Before	1.452165320215658	0.25075082166423424	10694429.278808594	0.622783	1.7523042972180906e-47	2.6718331530278296e-45	94.40389294403893	88.15250951389388
B	BTG2	VAF>=0.1	Before	0.9424486165432705	0.4095797324635868	5.23417e+06	0.6600654091533722	6.79577647096793e-48	2.909563154784413e-45	72.42472266244057	51.587491047982816
CD8_Naive	TUBB4B	VAF>=0.1	Before	0.6694358703232982	0.42742503288017597	1003609	0.7152042974584678	6.305185076535035e-48	3.25804132316819e-45	66.04477611940298	30.04201680672269
CD8_Naive	DUSP2	VAF>=0.1	Before	0.9640745626144908	0.5997953486792272	1017584	0.7251633353477076	1.104014810163566e-47	5.514553976767012e-45	72.38805970149254	34.60656990068755
CD8_Naive	SRGN	VAF>=0.1	Before	1.3198960418386192	0.6043823302801744	1.05697e+06	0.7532278684879651	2.0379796532269555e-47	9.851330678582557e-45	90.29850746268657	66.21466768525592
CD16_Mono	SOD2	VAF>=0.1	Before	1.0499269490144425	0.2876838236196716	10644213	0.6198589901427272	6.9608874986284315e-47	1.0226362663426181e-44	81.91403081914031	66.70496158540963
CD8_TEM	CYBA	VAF>=0.1	Before	1.1521802079832633	-0.329499	3.68916e+06	0.34752967723982214	4.310305191965401e-47	1.2186777981434253e-44	88.93178893178893	93.58805445761968
CD16_Mono	ACTG1	VAF>=0.1	Before	2.0981652460239286	0.2614028590152553	1.06943e+07	0.6227778421267517	9.579706246455463e-47	1.3803067125301453e-44	99.59448499594485	97.79564873985784
CD16_Mono	JUN	VAF>=0.1	Before	1.244742453576983	0.38773282130408593	1.0624e+07	0.6186837915300561	1.0585282325920786e-46	1.510671006227838e-44	75.99351175993512	58.55532419042149
CD8_TEM	GIMAP7	VAF>=0.1	Before	0.6435574536244868	-0.341268	3.70897e+06	0.3493957443232806	6.563862478225921e-47	1.8214718377076933e-44	62.16216216216216	79.27829014785537
CD8_TEM	DUSP2	VAF>=0.1	Before	1.192156206351703	0.4372198750167112	6858837	0.6461229722099288	8.388442333618324e-47	2.2446572923084034e-44	78.24967824967824	55.562875128092514
CD4_Naive	RPL41	VAF>=0.1	After	3.8481570414448445	0.29374808902808347	2.48453e+07	0.6072388344163214	4.580503135056605e-47	4.289927467426452e-44	100	99.80862365255429
Platelet	SRSF2	VAF>=0.1	Before	0.5704601232166566	0.299811	2798202	0.6601117909913277	6.157649483122413e-47	4.856440921294177e-44	62.65822784810127	29.69920608296992
CD8_TEM	RBM3	VAF>=0.1	Before	1.0179583470063291	0.3076331714193399	6869762.936035156	0.6471522280830762	2.4511991072573106e-46	6.44407344250014e-44	85.32818532818533	68.65759039672083
CD4_Naive	IL32	VAF>=0.1	After	1.991244375373081	0.2521380781114182	24820693.560546875	0.6066375922309463	7.535752966395886e-47	6.642544600084844e-44	98.6233	97.15278862677707
Platelet	CD69	VAF>=0.1	Before	0.7772602644647302	0.3744086219925554	2835690	0.6689554237314526	2.02327299440614e-46	1.5159372910588004e-43	72.9958	36.11763390361176
CD16_Mono	KLF6	VAF>=0.1	Before	1.5200224432786855	0.28844380939127223	10654114	0.6204355685953947	1.412265379885731e-45	1.923890610689789e-43	95.05271695052717	86.64464708838946
CD16_Mono	TIMP1	VAF>=0.1	Before	1.8080737018593374	0.3494381496194494	1.06615e+07	0.6208652508611261	1.7578787444969045e-45	2.3731363050708212e-43	94.07948094079481	86.13484598262367
B	HLA-DPB1	VAF>=0.1	After	2.411703448317651	0.2576095248401944	1.11943e+07	0.6217217836043111	4.9282805603898205e-46	2.4616761399147153e-43	98.46029173419774	96.84051812761291
CD16_Mono	CTSC	VAF>=0.1	Before	1.1889000732916237	0.2902362995981719	1.06312e+07	0.6191023219147972	1.882677532068967e-45	2.518921680183346e-43	87.10462287104623	72.63588712572701
CD16_Mono	CCL4	VAF>=0.1	Before	0.3880910819240511	0.27147777883633206	9.71646e+06	0.5658319702124233	3.6553824338286495e-45	4.8049040149931856e-43	22.54663422546634	10.038055575500826
CD16_Mono	RPL26	VAF>=0.1	After	2.497725292669702	0.2587829087273801	1.07925e+07	0.6187774888897757	1.0108442786232995e-45	5.4098219697036224e-43	99.9232	98.73842938190505
CD4_TCM	SRGN	VAF>=0.1	After	1.2087817033623718	0.29060043054834506	12006787.100585938	0.6239555743541416	1.170599897313332e-45	6.746707485092415e-43	86.31484794275492	77.07994422495933
CD8_Naive	DNAJB9	VAF>=0.1	Before	0.5140241844334121	0.34256660168232944	967674	0.6895954955930812	4.9194746599191275e-45	2.2338887205723672e-42	57.83582089552238	22.32620320855615
CD16_Mono	C5AR1	VAF>=0.1	Before	1.138995520067101	0.28959214261454447	10598142	0.6171760746904654	2.59354747261551e-44	3.238692406428618e-42	81.99513381995133	70.70438716162849
CD16_Mono	PLAUR	VAF>=0.1	After	1.1920726220763036	0.32060643469696415	1.07251e+07	0.6149147107672281	8.7386858552003e-45	4.5154899151785e-42	78.2642	69.01313825022395
CD4_Naive	MT-CO3	VAF>=0.1	Before	3.3995260285216586	0.325956	30961405	0.5985172601084562	1.7595092530899877e-44	5.992328672171243e-42	100	99.79319615344845
NK_CD56low	PTGDS	VAF>=0.1	Before	0.42720844881311953	-0.311931	5.53886e+07	0.4378805948136261	1.4267085676672786e-43	1.0278474945429889e-41	20.552045227801795	32.28735796129891
CD16_Mono	SERPINA1	VAF>=0.1	Before	2.2297906545825525	0.32501789379513335	1.06248e+07	0.6187304372568097	1.0301554147901422e-43	1.2757751149281224e-41	95.70154095701541	90.06246858619947
CD8_TEM	BHLHE40	VAF>=0.1	Before	0.655028	0.2990158945745013	6.67942e+06	0.6292209299455677	5.085757746312862e-44	1.3139668935947971e-41	58.17245817245818	37.89342702386181
Platelet	TUBA1A	VAF>=0.1	After	0.630398	0.25427438961093274	3.67209e+06	0.6430612470054218	1.4600170875609032e-44	1.4585570704733422e-41	72.43867243867244	42.633495145631066
B	MT-CO1	VAF>=0.1	Before	3.9143423392167627	0.3059118323777055	5.2652e+06	0.6639783817375949	4.4815670275617104e-44	1.865452275222562e-41	100	99.95225590833134
CD16_Mono	LILRB2	VAF>=0.1	After	1.4381131456437966	0.2968875895376073	10731590	0.6152872971687446	6.830267646134823e-44	3.1984862711665726e-41	88.78648233486943	81.86772170797254
CD16_Mono	RPL18A	VAF>=0.1	After	2.569996335954317	0.2514975849151124	1.07478e+07	0.6162186055034425	7.610218277789313e-44	3.4557309361416014e-41	99.84639016897081	98.78321887130487
B	SELL	VAF>=0.1	After	1.147468842058415	0.29081653132871166	1.10931e+07	0.6161008812186016	9.884786651570405e-44	4.232100799250929e-41	82.09076175040518	68.09677198272908
CD8_TEM	TUBB4B	VAF>=0.1	Before	0.7067800782421279	0.3259882942719251	6704583	0.6315917837656968	1.9434198550524515e-43	4.774122381632949e-41	59.45945945945946	42.717025325720975
CD4_TCM	CD69	VAF>=0.1	After	1.487146813847088	0.4044355743126067	11964262	0.6217456764573703	1.077750699005987e-43	5.568998008484384e-41	85.06261180679785	73.11759237741111
Platelet	PCBP1	VAF>=0.1	After	1.3737841366633683	0.39531432807701217	3.74768e+06	0.6563	7.20957162492217e-44	6.75221442496617e-41	97.54689754689755	75.49757281553397
CD4_TCM	NR4A2	VAF>=0.1	After	0.5548122053963929	0.26033862285665044	11521894	0.598757	1.480986271312951e-43	7.39752642520819e-41	45.52772808586762	28.10829653729956
CD8_Naive	BTG2	VAF>=0.1	Before	0.9725365134623767	0.5320254130701161	1.02096e+06	0.7275666881406565	1.8329109906831896e-43	8.078285645702235e-41	77.61194029850746	44.63330786860198
CD8_Naive	UBC	VAF>=0.1	Before	2.0661493790840644	0.4956268698671231	1048995	0.7475478318871647	3.978479463708281e-43	1.7033575646762454e-40	99.6269	95.64553093964858
Platelet	CD69	VAF>=0.1	After	0.7695390724957557	0.3076975727049808	3.66554e+06	0.6419152516846691	1.9331680690738464e-43	1.704030795004211e-40	72.0058	41.12864077669903
CD8_Naive	GIMAP7	VAF>=0.1	Before	0.6101868160413358	-0.550747	357166	0.25452842263092484	4.954566661822509e-43	2.0623383729836192e-40	63.80597014925373	88.02521008403362
CD8_TEM	DNAJB1	VAF>=0.1	Before	0.9100665251788741	0.3368145467507242	6761820	0.6369836804619413	1.616009164458469e-42	3.905789891840348e-40	73.23037323037323	53.29380764163373
CD4_TCM	IL32	VAF>=0.1	After	2.7313043670830166	0.25143395092153753	11960925	0.6215722628926775	1.8123936470940002e-42	8.76087703280761e-40	99.37388193202146	98.78573088542876
CD4_TCM	HNRNPA1	VAF>=0.1	After	1.7937191518225595	0.2658300558919722	11947056.71484375	0.6208515710241965	2.144453263946602e-42	1.0042072550074948e-39	99.6422	93.6672
CD16_Mono	TUBA1A	VAF>=0.1	Before	1.1931549874685223	0.2712587427595159	10545283	0.6140978643652911	9.202524926682775e-42	1.0689909769483827e-39	86.69910786699107	75.27823651899187
CD8_Naive	MYADM	VAF>=0.1	Before	0.7997354836772032	0.4697072863202038	999324	0.7121503112778355	3.9147998549070886e-42	1.585493941237371e-39	70.52238805970148	35.886172650878535
B	LAPTM5	VAF>=0.1	After	1.9235908526949206	0.25777938926133404	11085380	0.615673	6.285515976944692e-42	2.4150886388337487e-39	98.6224	94.94208758823932
CD4_TCM	TSC22D3	VAF>=0.1	After	1.685739598279936	0.36600758473887085	11933072	0.6201248286651115	5.559910091439083e-42	2.5247046278852925e-39	92.3077	84.22031141064373
CD8_Naive	GADD45B	VAF>=0.1	Before	0.8915103713764373	0.4951849840016678	1.01214e+06	0.7212834082072449	7.399131862513485e-42	2.9177892357832782e-39	76.11940298507463	44.02215431627196
CD16_Mono	MS4A7	VAF>=0.1	Before	1.585327116911053	0.33353421818057294	1.05448e+07	0.6140675533780562	5.911532792969212e-41	6.762161748293407e-39	88.15896188158962	78.48064909887269
Platelet	SRSF7	VAF>=0.1	After	0.7614092167126716	0.27675929033201035	3.66919e+06	0.6425539199204248	2.869400540441986e-41	2.1498983549261577e-38	82.68398268398268	53.77427184466019
B	RPL41	VAF>=0.1	After	3.9890193587029965	0.2725787788139211	1.10651e+07	0.6145467272014553	7.340803521483466e-41	2.5000441083961307e-38	100	99.86292920293332
CD4_TCM	CXCR4	VAF>=0.1	Before	1.2015135168661963	0.2808056033072698	19097289.428710938	0.6005691885885387	2.6327712635193955e-40	3.371972425969072e-38	79.79933110367892	70.22566995768689
B	MT-ND4L	VAF>=0.1	Before	2.5441839415231278	0.3209617380305829	5211692	0.6572305879471768	9.244761486871547e-41	3.645598707388688e-38	98.57369255150554	98.33691414020849
CD16_Mono	NFKBIA	VAF>=0.1	After	1.4927273040905773	0.3509790376704762	10653115	0.6107879945821459	1.043398131980723e-40	4.009056668649009e-38	85.8679	77.67243953418931
B	NCF1	VAF>=0.1	After	1.4351287894152127	0.2662698154882419	1.10384e+07	0.6130649407890812	1.4716529436215225e-40	4.79406942612359e-38	90.92382495948137	83.03748886299775
CD4_TCM	DDIT4	VAF>=0.1	Before	0.7761653028943382	0.25811430542696256	18925142.626953125	0.595156	4.622725061381535e-40	5.772627920400192e-38	62.675585284280935	50.31029619181946
CD16_Mono	TIMP1	VAF>=0.1	After	1.673109517289355	0.3189784975366585	1.06545e+07	0.6108693805015046	2.1301038907570523e-40	7.785269951949861e-38	89.78494623655914	82.30068677217079
Platelet	TSC22D3	VAF>=0.1	Before	1.6891968771157353	0.4527994776732782	2873391	0.6778493043848736	5.248301963342137e-40	3.4193828226383446e-37	97.8903	88.75097841887509
Platelet	DNAJB1	VAF>=0.1	Before	0.5179539305178327	0.25639319421619333	2723943	0.642594	6.044687739062512e-40	3.774151907077156e-37	57.17299578059072	26.858995862685898
CD8_Naive	DDIT3	VAF>=0.1	Before	0.37455466298155365	0.2646018814197216	910754	0.6490328152970822	1.0324717304007377e-39	3.967074071808988e-37	42.91044776119403	13.884644766997708
B	HLA-DRB5	VAF>=0.1	Before	2.2695211985372827	0.45010166783826855	5191340	0.6546640592793467	1.5473226123712716e-39	5.7966573365958766e-37	96.67194928684627	92.05856608578021
CD8_Naive	CXCR4	VAF>=0.1	Before	1.583754140551821	0.63271	1028905	0.7332310468285007	2.4300559107878348e-39	8.881558005647733e-37	91.4179	74.33155080213903
B	MTRNR2L12	VAF>=0.1	Before	2.485899706315054	0.5154933167693678	5187081	0.6541269697748121	3.0803602967653285e-39	1.1258341230982549e-36	99.68304278922345	91.49359433436778
B	ZFP36L1	VAF>=0.1	After	1.0529521702128226	0.25325610301034707	10969008	0.6092101578569059	4.184169134367448e-39	1.1399958996090219e-36	81.52350081037277	69.21389897882257
Platelet	HLA-DRB5	VAF>=0.1	After	0.8501272230436481	0.33155630344626663	3.65452e+06	0.6399857626192578	2.9943727479374974e-39	1.950898940341017e-36	74.45887445887446	53.228155339805824
Platelet	KLF6	VAF>=0.1	Before	1.1232081258927005	0.3203052081690384	2831301	0.6679200336307161	3.8120929152945654e-39	2.1970850898341945e-36	92.19409282700421	79.347
B	DUSP2	VAF>=0.1	Before	0.4168971884281621	0.25267610395592377	4.74775e+06	0.5987239615943802	9.611414547033341e-39	3.429215404459395e-36	34.389857369255154	15.477043049255986
CD4_Naive	MT-ND2	VAF>=0.1	Before	2.0140197512759292	0.25597395691138836	30583217.823242188	0.5912064952112805	1.308305901451625e-38	3.92099278665052e-36	97.5883	95.99145210767587
CD8_TEM	LAPTM5	VAF>=0.1	Before	1.44836	0.2729759077436009	6750239.982421875	0.6358928081499413	3.2756830997258216e-38	7.113929166578469e-36	97.16859716859717	88.88156931635193
CD16_Mono	TUBA1B	VAF>=0.1	Before	1.278197333140951	0.2709773930571402	10451010	0.608608	9.760688428989947e-38	1.0087166628166506e-35	86.86131386861314	76.75737775543907
CD16_Mono	AIF1	VAF>=0.1	Before	2.692157328675155	0.26831061538276924	10475108	0.6100112677673777	1.002853569819534e-37	1.0292986810784738e-35	97.40470397404704	93.95418970345372
B	RPL41	VAF>=0.1	Before	4.0226384935514625	0.26773620014730604	5163172	0.6511118786820865	1.0832934764056948e-37	3.775151800916125e-35	99.84152139461173	99.78515158749104
Platelet	FOS	VAF>=0.1	After	1.3831024474364761	0.42729384002039006	3.6738e+06	0.6433607048291514	8.112662568432169e-38	5.065343691164835e-35	82.82828282828282	66.61407766990291
CD4_Naive	MT-ND1	VAF>=0.1	Before	2.1781383520808015	0.2603846772022931	30503084.103515625	0.5896574242187645	2.634296125222438e-37	7.321839024849656e-35	98.99046550757151	97.34946403336436
CD8_TEM	MYADM	VAF>=0.1	Before	0.7408036667372269	0.2882721148864112	6.60802e+06	0.622495	3.761898346276165e-37	7.939724889992724e-35	63.32046332046332	43.148880105401844
CD16_Mono	MT-ND4L	VAF>=0.1	Before	1.8612520401243067	0.2807110062975462	10438120	0.6078572950568166	1.4767647568105461e-36	1.4558763079477655e-34	98.3779	90.71587563725139
CD8_TEM	EEF2	VAF>=0.1	Before	1.6505308652240458	0.30184484182786986	6730501	0.6340333369318877	7.4522604509272275e-37	1.5297551076321164e-34	99.09909909909909	90.03074220465524
Platelet	PCBP1	VAF>=0.1	Before	1.3985906950861358	0.4506294699188568	2.84084e+06	0.6701711637369538	4.7526739343792425e-37	2.63773403358048e-34	95.56962025316456	73.29755115732975
CD8_Naive	SBDS	VAF>=0.1	Before	0.7732756106757828	0.39387706815389073	992141	0.7070318290138308	7.813017467911495e-37	2.6608651535603126e-34	76.49253731343283	45.62643239113827
CD8_Naive	MALAT1	VAF>=0.1	Before	3.246141976742347	-0.582379	380384	0.2710736092265943	9.61564009729787e-37	3.2020081524001908e-34	100	100
B	TCL1A	VAF>=0.1	After	1.599073972924689	0.35927939141364473	10918965	0.6064308086277291	1.553998345246112e-36	3.881110867252165e-34	81.60453808752027	68.93290384483586
CD8_TEM	S100A11	VAF>=0.1	Before	0.7246878852351354	-0.292117	3906568	0.36801039699590427	2.0828098127568993e-36	4.053364291449628e-34	67.95366795366795	82.14024300980822
CD8_Naive	LMNA	VAF>=0.1	After	0.46546294610123484	0.33863568752142204	786158	0.6407151589242054	1.4496878637078583e-37	1.0861786318831128e-33	40.666666666666664	14.10757946210269
CD8_Naive	TENT5C	VAF>=0.1	Before	0.4813688458164374	0.29503934961444356	940092	0.66994	3.369832981787712e-36	1.0977597224367145e-33	55.59701492537313	22.650878533231474
CD16_Mono	FTL	VAF>=0.1	Before	4.389238107191127	0.28991560057156107	1.04197e+07	0.6067828418964347	1.4073125932030552e-35	1.3180362005717363e-33	100	99.85639405471387
CD16_Mono	IFITM2	VAF>=0.1	Before	2.052409410963635	0.28987840596358194	1.0412e+07	0.6063371160630121	1.8806412945858825e-35	1.7503981241844378e-33	97.64801297648013	93.5018
CD4_TCM	DUSP2	VAF>=0.1	After	0.6974443985233856	0.28045484920218045	1.14804e+07	0.5966017229315821	8.128954851932371e-36	2.7684633740046953e-33	52.772808586762075	36.76504764118057
CD4_TCM	DDIT4	VAF>=0.1	After	0.755051	0.25298779364973867	1.15911e+07	0.6023551349746838	1.997207317885147e-35	6.367691842235943e-33	64.04293381037567	48.774111085289334
CD8_TEM	DDIT4	VAF>=0.1	Before	0.7133586909507889	0.28769112707120853	6.5659e+06	0.6185273830201367	3.979120402499082e-35	7.453389903931093e-33	60.61776061776062	42.96589079197775
B	GADD45B	VAF>=0.1	Before	0.47690662184161536	0.26955034118376797	4835882	0.6098383346719586	2.654873636083381e-35	8.648539442762928e-33	42.789223454833596	23.609453330150394
CD8_Naive	SRSF7	VAF>=0.1	Before	1.1455936203967343	0.43586541209657315	1.00386e+06	0.715386	3.6856772189647396e-35	1.1751036835358856e-32	86.56716417910447	71.52406417112299
CD8_Naive	IER2	VAF>=0.1	Before	1.2001834998509515	0.5522559732278941	1.00243e+06	0.7143608970046634	4.1259612493233723e-35	1.2880735275231402e-32	83.95522388059702	61.11535523300229
Platelet	SLC2A3	VAF>=0.1	Before	0.7223665350893933	0.30305163405942814	2750349	0.648823	3.0609711319718563e-35	1.6381661575927954e-32	72.78481012658227	38.51056692385106
CD4_Naive	FOS	VAF>=0.1	After	1.4527772335356204	-0.379396	1.67147e+07	0.4085203241866737	5.555017610066277e-35	1.981950925877218e-32	77.72215269086358	83.16669270426496
CD16_Mono	HMOX1	VAF>=0.1	Before	1.132229177922124	0.26132430846064647	10344864	0.6024265910691428	3.2801978233502214e-34	2.8412580568152066e-32	81.18410381184104	70.43871616284915
B	EEF2	VAF>=0.1	Before	2.069510079471183	0.3693265981382554	5107492	0.6440902436474569	1.3346137522052733e-34	4.0814667503665344e-32	99.20760697305863	93.61024906501154
CD8_Naive	PTGER4	VAF>=0.1	Before	0.6476375262935956	0.36566728648501995	958896	0.6833403646397501	1.3619006254161366e-34	4.081616174372161e-32	64.55223880597015	30.786860198624904
CD4_TCM	JUNB	VAF>=0.1	After	2.185747771454315	0.4032977016885462	11710039	0.608534	2.69424202825511e-34	7.764080152577466e-32	94.09660107334525	88.74041366488497
B	SARAF	VAF>=0.1	Before	1.3813127887663728	0.33095083581941553	5.08955e+06	0.6418280741059932	2.8823794966904656e-34	8.306241684212813e-32	93.81933438985737	81.80154372563062
CD8_TEM	MT-ATP6	VAF>=0.1	Before	2.8920897649000756	0.2918090955279702	6.67877e+06	0.6291604516242197	6.503931211148629e-34	1.146604814106614e-31	100	99.5755
NK_CD56high	EIF1	VAF>=0.1	Before	2.834024779443324	0.813766	95056	0.8899374602104633	7.66148870577369e-36	1.1480740825601876e-31	100	99.31093884582258
MAIT	TRBV11-2	VAF>=0.1	Before	0.699465	0.6834126913662169	22223	0.6616351077765869	8.038504136381368e-36	1.204569844836748e-31	33.33333333333333	1.1789924973204717
CD4_TCM	CXCR4	VAF>=0.1	After	1.1786530102320574	0.3221352419473478	11650457	0.6054382015792119	6.205386403921845e-34	1.7219947270883119e-31	76.92307692307693	66.4072
Platelet	KLF6	VAF>=0.1	After	1.0390538920556818	0.26246708129885254	3.60272e+06	0.6309144671401953	7.424008911147719e-34	3.9731704833410206e-31	91.1977	77.36650485436894
CD4_TCM	ANXA1	VAF>=0.1	After	1.5796603281566615	0.30520557280910277	1.16752e+07	0.6067234211102875	1.661367138645649e-33	4.3676467671236925e-31	89.71377459749553	82.07064838484777
CD8_Naive	SLC2A3	VAF>=0.1	Before	1.0846183658619615	0.4905597036159832	991894	0.7068554524930732	2.078865864375472e-33	5.877699052389896e-31	83.95522388059702	56.43621084797555
CD8_Naive	RGS1	VAF>=0.1	After	0.3406545142415225	0.2505333672684959	755350	0.6156071719641402	1.643707373633341e-34	6.1577387484739035e-31	32.33333333333333	9.6088
Platelet	NFKBIA	VAF>=0.1	After	0.830023	0.2634837007887171	3.59421e+06	0.6294227819106459	1.2126292787763954e-33	6.26594818705665e-31	78.4993	59.75728155339806
Platelet	YPEL5	VAF>=0.1	Before	0.8300517844903038	0.33894133896052464	2751235	0.6490320081566754	1.441894503642179e-33	7.202263045692684e-31	73.83966244725738	43.01688471430169
CD16_Mono	CD52	VAF>=0.1	After	1.8036185640354188	0.26713842003995913	10466591	0.600094	4.009483664961891e-33	1.092402049444617e-30	94.70046082949308	90.45983875783816
B	TAGAP	VAF>=0.1	Before	0.9425255333400975	0.31291212084550035	5.03371e+06	0.6347857575313909	4.6678468469007735e-33	1.2490658035858589e-30	76.38668779714739	58.92416646773295
CD8_Naive	TXNIP	VAF>=0.1	Before	1.6759958952907539	-0.477961	398330	0.28386322303684025	4.657282221577243e-33	1.292395816487685e-30	95.8955	99.15966386554622
CD4_Naive	DUSP1	VAF>=0.1	After	1.0991439385610215	-0.291876	16869156.090820312	0.41229566002819473	1.6998981371518182e-32	4.548745283074999e-30	75.46933667083854	80.96000624902359
CD8_Naive	RGCC	VAF>=0.1	After	1.1080259569789415	0.6338594513507556	849873	0.6926430317848411	1.727574641202736e-33	5.1775411996846e-30	71.33333333333334	48.826405867970664
B	MAP3K8	VAF>=0.1	Before	0.6058361798985384	0.2795621154585463	4901834	0.6181553403078044	8.059687762450618e-32	1.9799085429561066e-29	53.88272583201268	35.418158669531316
CD4_TEM	TRBV7-6	VAF>=0.1	Before	0.6160314276595613	0.555832	93224.5	0.6440379965457685	1.4593460902821795e-33	2.186830116287846e-29	32	3.2124352331606216
CD8_TEM	TXNIP	VAF>=0.1	Before	1.7038495015768451	-0.280744	3990598	0.3759262744769991	1.639645177141545e-31	2.641944406394199e-29	95.62419562419564	97.57722149026496
CD8_TEM	DNAJA1	VAF>=0.1	Before	0.6704371619979078	0.2540597377096985	6507355	0.6130123159108667	1.8099843016988898e-31	2.8853845490380706e-29	60.74646074646075	46.48660518225736
CD8_TEM	TUBA1B	VAF>=0.1	Before	0.9038973288319249	0.25878103799069785	6.57265e+06	0.6191632532212242	1.9835090606750362e-31	3.1287245551805703e-29	74.77477477477478	64.44151661542966
CD8_TEM	ZFP36L1	VAF>=0.1	Before	0.843546	0.29241975527689545	6546952	0.6167424718149356	3.180785498287303e-31	4.965007363732837e-29	68.33976833976834	55.51895769287074
B	MT-ND3	VAF>=0.1	Before	2.1557039173314414	0.2856731344036023	5.04843e+06	0.6366426823856459	2.6908232914130668e-31	6.50354629384271e-29	98.25673534072901	97.56505132489855
B	MT-CO3	VAF>=0.1	Before	3.247346737681469	0.2672560501527963	5.05018e+06	0.6368628651221844	3.0703038124373443e-31	7.302936925297397e-29	100	99.87268242221691
Platelet	JUNB	VAF>=0.1	Before	1.5158378775246582	0.39027159172119497	2.77902e+06	0.6555877095019512	1.692066091559277e-31	7.923628244379928e-29	94.51476793248945	87.57687576875769
B	LTB	VAF>=0.1	After	2.1572461769867246	0.26350703308842993	10782727	0.5988642562570764	5.7716842066402795e-31	9.941228486954551e-29	94.08427876823339	91.76204509629223
Platelet	S100A12	VAF>=0.1	Before	0.5148547950012224	0.2940761731287269	2.64282e+06	0.6234561741474722	2.616040069567276e-31	1.1879200134080493e-28	47.67932489451477	26.322263222632223
Platelet	JUN	VAF>=0.1	After	1.1846044032128946	0.29133687152727805	3592470	0.6291188584877905	2.6928885981001616e-31	1.301707601371965e-28	86.86868686868688	73.85922330097088
CD8_Naive	RPL41	VAF>=0.1	Before	4.274771077480178	0.2741373247694785	994844	0.7089577180940219	6.656232891532935e-31	1.8135209069022005e-28	100	99.98090145148969
CD8_Naive	ZFP36	VAF>=0.1	After	1.6946399946401838	0.8041315858718429	856227	0.6978215158924206	8.748687359012062e-32	2.184984667913262e-28	84.33333333333334	68.94865525672371
Platelet	RPS26	VAF>=0.1	After	1.8067348068694769	0.346761	3.59819e+06	0.6301209914680789	8.989682585611464e-31	4.202863329145951e-28	97.83549783549783	95.3762
Platelet	JUNB	VAF>=0.1	After	1.407832434070812	0.27891659655083045	3.59406e+06	0.629397	9.255554879000093e-31	4.202863329145951e-28	92.92929292929293	86.57766990291262
CD8_Naive	CSRNP1	VAF>=0.1	After	0.5269364149655741	0.33339	797378	0.6498594132029339	2.8492858783220174e-31	6.099506983807919e-28	49	22.12713936430318
CD8_TEM	MTRNR2L12	VAF>=0.1	Before	2.1164145785784023	0.37036374487264667	6.59002e+06	0.6207999360173273	5.405810112871712e-30	8.18243076175582e-28	99.09909909909909	92.08022251500513
B	EEF1A1	VAF>=0.1	Before	4.175174031977485	0.3044019507445719	5029133	0.634209	4.3763531009098225e-30	9.9363107904748e-28	100	99.9443
CD4_CTL	RPS26	VAF>=0.1	After	2.3123781380403803	0.46275818868671603	974928	0.6774247342909236	1.5979096432479013e-31	1.19723380020349e-27	99.49748743718592	96.958
CD8_Naive	ZFP36L2	VAF>=0.1	Before	2.0635259552196525	0.5522518770314362	987739	0.7038948211577711	9.692905397872409e-30	2.5937176319128226e-27	97.01492537313433	91.27196333078686
Treg	PPP1R15A	VAF>=0.1	Before	1.5087427447077297	0.778029	328778	0.7599999537681287	2.769657054431499e-31	4.150331096065601e-27	88.34355828220859	56.51846269781462
B	DAZAP2	VAF>=0.1	Before	1.0663968936120882	0.2570876020106322	4988822	0.6291251317660005	2.0407087987847204e-29	4.564182291013289e-27	86.37083993660856	75.13328558924167
Platelet	MPIG6B	VAF>=0.1	Before	1.7982478567254097	0.5411359623644152	2763321	0.6518831644012643	1.4600090482447638e-29	5.913036645391293e-27	85.0211	72.86145588728614
CD8_Naive	ANXA1	VAF>=0.1	Before	1.6680718706173783	0.5964228132758131	983475	0.7008561565738914	2.4583293390654503e-29	6.351390542395823e-27	87.31343283582089	75.55385790679908
CD8_Naive	FOSB	VAF>=0.1	After	0.8388364831852487	0.46309619696399906	824446	0.6719197229013855	4.09706683943633e-30	7.674318323619175e-27	62.66666666666667	36.9682
Platelet	DDX5	VAF>=0.1	After	1.3796193743538663	0.2646679430075345	3574418	0.6259575645497976	2.454558248934437e-29	1.0818104517730159e-26	97.6912	89.38106796116504
CD4_CTL	HSPA8	VAF>=0.1	After	1.9361099052017479	0.3732504325098722	969625	0.6737399664250456	2.386982902529408e-30	1.1922979598134392e-26	99.2462	93.72234513274337
CD4_TCM	S100A4	VAF>=0.1	After	2.4284539831803893	0.2840695482132096	11532172	0.599291	6.74126789405271e-29	1.3469053252317315e-26	98.56887298747765	96.21775505461306
CD4_TCM	NFKBIA	VAF>=0.1	After	1.119062190933541	0.3206330238685918	11471349	0.5961305130131368	1.0177840288567125e-28	1.9807134639503683e-26	72.62969588550983	65.47757378573088
Platelet	MPIG6B	VAF>=0.1	After	1.5495794362840094	0.43903931996745715	3.57125e+06	0.6254030422112946	6.292037174653567e-29	2.693890773205249e-26	82.82828282828282	69.07766990291262
CD16_Mono	IFI30	VAF>=0.1	After	3.1471032257694103	0.2575471864952332	10340562	0.5928680134244626	1.4994091511121934e-28	2.880595657617464e-26	99.46236559139786	97.88742908330845
CD16_Mono	HLA-DRB5	VAF>=0.1	Before	1.902400906767946	0.3010602051315654	10191054	0.5934695633138871	8.16634445816647e-28	4.6707126605200216e-26	97.64801297648013	87.5422
CD8_Naive	KLF6	VAF>=0.1	After	1.3554493254385007	0.5622667311514584	844388	0.6881723716381418	4.1436807431983525e-29	6.899228437425256e-26	81	66.57701711491443
CD8_TEM	HSPA5	VAF>=0.1	Before	0.9218932539997583	0.25847918645898116	6496568	0.6119961482280323	6.965979131458689e-28	8.9319679196111e-26	74.64607464607465	61.95286195286195
CD4_CTL	EEF2	VAF>=0.1	After	1.7150926843472107	0.3480814117235467	962258	0.6686213840218793	7.560848426276258e-29	2.2659862733549945e-25	99.2462	91.26106194690266
CD16_Mono	HLA-DQA1	VAF>=0.1	Before	0.5445834227796085	-0.252107	7.05583e+06	0.410892	4.216305776022671e-27	2.2891790599166567e-25	52.55474452554745	61.362820420765416
Treg	ZFP36	VAF>=0.1	Before	2.04589	0.9165007675377392	327856	0.7578698202967161	4.0036820648819784e-29	2.7729685020682553e-25	94.47852760736197	75.20723436322531
Treg	EIF1	VAF>=0.1	Before	2.771564122453708	0.4895227926040975	328704	0.7598312074377834	5.55148849262914e-29	2.7729685020682553e-25	100	99.84928409947248
Platelet	MT-CO3	VAF>=0.1	Before	3.116531380970197	0.3407912851035588	2.74807e+06	0.6482861922980565	1.104626058691531e-27	4.244313202433998e-25	100	99.87699876998771
CD8_TEM	RPS26	VAF>=0.1	Before	1.5726392470066304	-0.37766	4.09707e+06	0.3859559258109983	6.09176938869596e-27	7.60709702413408e-25	96.3964	97.19660371834284
Platelet	GP1BB	VAF>=0.1	Before	1.4937387131245934	0.4838756540726352	2727009	0.6433169567599013	2.7575062238425496e-27	1.033030769107015e-24	79.9578	62.71944537627194
CD8_TEM	CXCR4	VAF>=0.1	Before	1.1974221850817628	0.3329695313736437	6478930	0.6103345958418422	8.350917466247266e-27	1.0342024647249196e-24	77.47747747747748	60.12296881862099
Treg	FOS	VAF>=0.1	Before	2.488263613487978	1.0940210412428806	325754	0.7530108506202006	4.203288364823987e-28	1.2597255229377488e-24	95.70552147239265	70.72343632253202
CD8_Naive	DNAJA1	VAF>=0.1	Before	0.7429021519347194	0.3502058489686001	949210	0.6764378071445675	5.2184024018391274e-27	1.2612541934122471e-24	70.52238805970148	47.211611917494274
Platelet	MT-ATP6	VAF>=0.1	Before	2.9028200057295783	0.40648944279949495	2738047	0.6459208838348452	7.27042763261106e-27	2.5939847160637317e-24	100	99.262
Treg	NR4A2	VAF>=0.1	Before	0.9856148545122637	0.6086353134732261	310385	0.7174839690986172	1.653239142793739e-27	3.930523751392688e-24	69.32515337423312	34.325546345139415
Treg	LMNA	VAF>=0.1	Before	0.949073	0.5859673794321312	309226	0.7148059879519744	1.8360804978144023e-27	3.930523751392688e-24	69.93865030674846	32.85606631499623
CD8_TEM	TUBA4A	VAF>=0.1	Before	0.817908	0.2544687945023545	6439702	0.6066392008420994	3.4365436492306096e-26	4.054850912103991e-24	69.24066924066923	57.48792270531401
B	UBB	VAF>=0.1	Before	1.390001322414142	0.2674009187734503	4.93715e+06	0.6226083659099114	4.219961205916649e-26	8.004571983627973e-24	95.08716323296355	87.14888199252009
Platelet	GIMAP7	VAF>=0.1	Before	0.5618610044365323	-0.290573	1.54193e+06	0.3637511317575776	2.6954755611755905e-26	9.393418903306098e-24	62.0253	81.52745163815275
B	PABPC1	VAF>=0.1	Before	1.953685364066695	0.2911242290395686	4946579	0.6237979958326697	5.157100122544346e-26	9.659893167040878e-24	98.8906	94.05586058725233
CD8_Naive	EIF5	VAF>=0.1	Before	0.7450193010961162	0.3395558385476818	945982	0.6741377860506482	4.379855775320536e-26	1.0417799808440989e-23	73.13432835820896	48.75859434682964
CD4_CTL	RGCC	VAF>=0.1	After	0.517133	0.30301621619398933	893218	0.6206488749055009	8.767847513403032e-27	1.876945642690635e-23	43.46733668341709	20.99004424778761
CD8_Naive	ARL4A	VAF>=0.1	Before	0.4682855275337322	0.2626910824021156	905684	0.6454201253092825	1.0120422831436547e-25	2.3696021270168227e-23	52.61194029850746	24.656226126814364
CD8_TEM	CALR	VAF>=0.1	Before	1.1182272830272093	0.25484594452929954	6456689	0.6082394270800068	2.8180458447378914e-25	3.2235432811753666e-23	84.94208494208493	72.03923290879813
CD8_Naive	GIMAP4	VAF>=0.1	Before	0.46379730256751533	-0.374503	444578	0.31682033396805126	2.1439508353755643e-25	4.795090040015348e-23	52.23880597014925	76.738
Platelet	MT-ND2	VAF>=0.1	Before	2.397967904631887	0.42878639355172443	2.72101e+06	0.6419014046296965	1.4250969138637831e-25	4.853426648692907e-23	98.94514767932489	97.99843452979984
CD4_CTL	RGS1	VAF>=0.1	After	0.4395636860077645	0.27836571530044046	878290	0.6102758677235737	3.151336284817367e-26	5.90284677849853e-23	37.437185929648244	16.89712389380531
Platelet	RAC1	VAF>=0.1	After	0.9377040559947794	0.2630893095287836	3507532	0.61424438560360894	1.8245208317537126e-25	6.835111165957346e-23	85.13708513708514	61.34708737864077
Platelet	DAP	VAF>=0.1	Before	0.690055	0.34047349170187047	2.61404e+06	0.6166668082100843	2.0842652853564044e-25	6.940603400236826e-23	48.9451	30.660852063066084
CD4_TEM	TRAV14DV4	VAF>=0.1	Before	0.49356446013966937	0.43379650007999443	92615.5	0.6398307426597583	9.426256490886382e-27	7.062622675796622e-23	32	4.145077720207254
Platelet	F13A1	VAF>=0.1	After	1.3203955953808375	0.38746981947515113	3.51499e+06	0.6155503544459855	2.0753396596241893e-25	7.585113365724019e-23	76.62337662337663	61.72330097087379
CD8_TCM	HSPA8	VAF>=0.1	After	1.9186635323041152	0.3644423731148112	1028853	0.6592168998923573	5.2753716347510025e-27	7.905144394674377e-23	99.28571428571429	92.761
CD8_TEM	TRBV3-1	VAF>=0.1	Before	0.011811862522870814	-0.344409	4.63736e+06	0.43685286076590424	9.490220708861072e-25	1.0692553182126553e-22	0.7722007722007722	13.32162201727419
CD4_CTL	EIF1	VAF>=0.1	After	2.380249191947002	0.27213543827473163	949580	0.6598114327166807	7.730609957741567e-26	1.287146557963971e-22	99.74874371859298	99.50221238938053
CD16_Mono	S100A9	VAF>=0.1	After	1.6671596888523001	0.2577823745711716	10209621	0.5853606138705687	1.2646369507311286e-24	1.8221716064140346e-22	93.16436251920123	87.123
Platelet	JUN	VAF>=0.1	Before	1.2439156105570552	0.38757066344573243	2.69238e+06	0.6351474245467426	7.359612421522587e-25	2.2975790028440827e-22	86.91983122362869	74.04674046740467
CD8_TCM	RPS26	VAF>=0.1	After	2.2264797211662164	0.3827690340326195	1.02504e+06	0.6567741170741709	3.2221811924869145e-26	2.414219258470821e-22	98.33333333333333	97.6319
NK_CD56high	JUN	VAF>=0.1	Before	3.152354662230664	1.6646246500834554	88385.5	0.827487	3.6968407493811705e-26	2.769857931473842e-22	97.82608695652173	71.83462532299741
Platelet	TSC22D3	VAF>=0.1	After	1.507549750454115	0.3064917350691625	3.51808e+06	0.6160907795009737	8.408544913616538e-25	3.0000487031081863e-22	95.0938	85.95873786407768
CD4_CTL	PCBP1	VAF>=0.1	After	1.3723204914589398	0.3499061426651815	945056	0.656668	2.0660824528706072e-25	3.096024555626605e-22	96.23115577889448	80.91814159292035
CD4_CTL	LINC02446	VAF>=0.1	Before	0.4804265486922137	0.38151865481746006	290786	0.6521368115578002	3.877743845049955e-26	5.810799151807358e-22	38.93805309734513	9.249873289406993
CD4_CTL	GZMH	VAF>=0.1	After	2.3333081905794817	0.3314729077246321	945666	0.6570918058211411	5.5050492750237495e-25	7.499378489657353e-22	99.2462	96.54314159292035
B	MT-ATP6	VAF>=0.1	Before	3.002262014566598	0.2849605439213998	4.90879e+06	0.6190328555267065	4.9130893946048816e-24	8.090400503093863e-22	99.84152139461173	99.48277234025623
Platelet	COTL1	VAF>=0.1	Before	1.4432871505750962	0.36731802288191595	2696814	0.6361937842623535	2.792838018946948e-24	8.370135542784003e-22	89.24050632911393	80.00670915800066
Treg	CSRNP1	VAF>=0.1	Before	0.611992	0.39829137949309956	295354	0.6827372504056847	5.937826430406612e-25	1.1122291132455386e-21	56.44171779141104	23.285606631499622
CD8_Naive	TNFAIP3	VAF>=0.1	After	1.1472120423592074	0.5547224531827815	816696	0.6656035044824776	1.1705942108006747e-24	1.169423616589874e-21	68.66666666666667	50.22
CD4_TCM	DUSP1	VAF>=0.1	After	1.5392052373220324	0.3302858421666883	11316648	0.5880911807172015	9.754388508924798e-24	1.2080124942664306e-21	79.42754919499106	69.75366023704393
CD8_Naive	YPEL5	VAF>=0.1	After	0.8951553446243576	0.41501716697153984	811514	0.661381	2.354881938404142e-24	2.205494115436629e-21	69.33333333333334	46.454767726161364
Platelet	RAC1	VAF>=0.1	Before	1.0029543194506134	0.31308343691891183	2674466	0.6309217637630922	1.1021801545801239e-23	3.238464630663364e-21	85.0211	61.634798166163485
NK_CD56high	FOS	VAF>=0.1	Before	3.8069330425013055	1.6686030749416756	87549	0.8196550949331536	1.171266560845897e-24	4.387857353568942e-21	98.91304347826086	81.56761412575366
NK_CD56high	NFKBIA	VAF>=0.1	Before	2.649395569633044	1.2308896830832496	87450.5	0.8187329139048047	1.1255751985132454e-24	4.387857353568942e-21	98.91304347826086	80.01722652885444
Platelet	TMSB4X	VAF>=0.1	After	4.44281	0.3302002048075252	3507746	0.6142818616119587	1.391397504099872e-23	4.8488585113806e-21	100	100
CD8_TCM	EEF2	VAF>=0.1	After	1.8196584008140877	0.32429378819280297	1.0165e+06	0.6513016428315137	1.3606246980808574e-24	6.796320366913882e-21	98.09523809523809	92.65339074273412
CD8_Naive	PPP1R15A	VAF>=0.1	After	1.0703920962559714	0.5121582325408373	810918	0.6608944580277099	9.157947487428193e-24	7.623991283283971e-21	66.33333333333333	47.92176039119804
CD8_Naive	HSPA5	VAF>=0.1	Before	0.9347996346243839	0.3757897891902162	939631	0.6696115013169447	3.861228942751767e-23	7.71473542761803e-21	79.1045	58.40336134453782
CD8_Naive	CD69	VAF>=0.1	After	1.5204106368644665	0.5247183531269379	822782	0.6705643846780767	1.0454452068353445e-23	8.245261276014547e-21	87	73.32518337408312
CD8_Naive	MT-ND3	VAF>=0.1	Before	1.9572681931927436	0.35524907162486485	951289	0.677919	4.294539302956183e-23	8.46758834931558e-21	98.88059701492537	96.50496562261269
CD16_Mono	LYZ	VAF>=0.1	Before	1.56577	-0.26486	7.1578e+06	0.4168296792142507	2.404805142425312e-22	9.384376317511277e-21	92.37631792376317	94.01163208156818
NK_CD56high	H3F3B	VAF>=0.1	Before	2.826970713956164	0.6039273191888754	87101.5	0.8154654907688275	5.207480751396471e-24	1.5606819811935224e-20	100	99.56933677863911
CD4_CTL	TRDV2	VAF>=0.1	After	0.17282161107268396	-0.566816	539730	0.37502918352826076	1.544521861868181e-23	1.928721675007891e-20	9.045226130653267	33.46238938053097
Platelet	STOM	VAF>=0.1	After	0.9002626003089884	0.3010672324913859	3450237	0.6042107972933216	6.718619286956595e-23	2.2881479548873768e-20	62.914862914862915	47.25728155339806
CD4_CTL	ZFP36	VAF>=0.1	After	1.840802546135133	0.5244655300850785	936584	0.6507812152577045	2.0471156753969036e-23	2.3596944919863536e-20	92.71356783919597	78.53982300884957
CD8_Naive	MYADM	VAF>=0.1	After	0.6689076789407034	0.3477727853458726	794077	0.6471695191524043	4.4794416492525907e-23	3.356221655702503e-20	58.666666666666664	36.01466992665037
Platelet	ARPC1B	VAF>=0.1	After	2.41964	0.3293831166150101	3.49061e+06	0.6112801909525211	1.637430116762368e-22	5.452642288818685e-20	99.13419913419914	97.83980582524272
CD8_Naive	EIF1	VAF>=0.1	After	2.34694	0.3177149471900935	821247	0.6693129584352078	7.81060447261188e-23	5.573424191528049e-20	100	99.364303178484107
CD8_Naive	GPR183	VAF>=0.1	Before	0.647519	0.32151043932998324	912844	0.6505222170279238	3.6071853078080093e-22	6.756708979687877e-20	61.940298507462686	35.886172650878535
CD8_Naive	DNAJB1	VAF>=0.1	Before	1.1758269894231244	0.4245184579495589	939302	0.669377	3.810393031347216e-22	7.04922710799235e-20	84.70149253731343	66.46294881588999
CD4_CTL	SUB1	VAF>=0.1	After	1.2470735012749568	0.29428922800461377	931545	0.6472802341352781	7.135860149306902e-23	7.637918881240281e-20	91.4573	81.72013274336283
NK_CD56high	UBC	VAF>=0.1	Before	2.3337415027228054	0.5921661213893068	86410	0.8089914990825001	3.2397391846532264e-23	8.091248613671433e-20	100	98.62187769164514
CD8_Naive	RBM3	VAF>=0.1	Before	0.9958148436310302	0.3075271319687586	936528	0.6674	4.5979060106283445e-22	8.402392874300701e-20	87.31343283582089	71.77234530175707
CD8_TCM	NR4A2	VAF>=0.1	Before	1.2019807884272464	0.7156926990175732	357479	0.7241694352159468	6.5689204480090705e-24	9.843527291341592e-20	72.14285714285714	40.58423142370959
Treg	UBC	VAF>=0.1	Before	2.5103335108695073	0.4701023625007501	315244	0.7287148464408394	7.469086100266672e-23	1.243602835694401e-19	100	98.90730972117558
Platelet	S100A9	VAF>=0.1	Before	1.5140786202781626	0.5711129151267378	2.66351e+06	0.6283370630023907	4.910331795372508e-22	1.3378422173392185e-19	78.48101265822784	71.70971709717097
CD8_TCM	GADD45B	VAF>=0.1	Before	1.0725634555097667	0.6142963098886667	358726	0.726695	3.0835975111575316e-23	2.3103854352347807e-19	79.28571428571428	47.02212138400454
CD4_CTL	TUBA4A	VAF>=0.1	After	0.7904032385534489	0.3062343201003531	918168	0.6379849329612665	2.6119345369777415e-22	2.609322602440764e-19	72.11055276381909	50.248893805309734
CD8_TCM	FOS	VAF>=0.1	Before	2.8055577809032846	1.2177087155660222	366160	0.7417541123085649	6.904211725818734e-23	2.6172765158644033e-19	94.28571428571428	69.85252410663641
Platelet	ZYX	VAF>=0.1	After	1.3753930893493667	0.33648735234929394	3.4619e+06	0.6062528019445496	2.9556851447235952e-21	9.423604658230442e-19	87.15728715728716	76.40776699029126
NK_CD56high	DUSP1	VAF>=0.1	Before	3.0347690195844974	1.2941325046199779	85535.5	0.8008042167546717	4.724075889273509e-22	1.011289674296622e-18	100	81.65374677002583
NK_CD56high	IER2	VAF>=0.1	Before	2.5601177787365526	1.0333253773746227	85334.5	0.7989224057222035	7.754337112420459e-22	1.4524842703702573e-18	97.82608695652173	90.78380706287683
CD8_Naive	DDX5	VAF>=0.1	Before	1.7157525099235111	0.3677232987639443	937048	0.6677711281256057	8.840454675223897e-21	1.5053887875935239e-18	98.88059701492537	91.0428
Treg	FOSB	VAF>=0.1	Before	0.9198545410865864	0.5030736490565408	301421	0.6967628443696515	1.2122656035390646e-21	1.8165800069032884e-18	71.16564417177914	38.43255463451394
CD8_TCM	FOSB	VAF>=0.1	Before	1.0801900973436556	0.5947568265315906	353724	0.7165636901385625	6.194677279490221e-22	1.8565447806632193e-18	76.42857142857142	42.71128757799206
Platelet	STOM	VAF>=0.1	Before	1.062700369578549	0.3697212338959315	2627530	0.6198492940050229	8.290886567694086e-21	2.1745598524705e-18	66.45569620253164	51.515151515151516
CD16_Mono	MALAT1	VAF>=0.1	After	3.544607043834646	-0.250266	7.3747e+06	0.42282238341545886	3.267422213770051e-20	2.863293676803755e-18	100	99.80591221260077
CD4_CTL	TSC22D3	VAF>=0.1	After	1.940541797866484	0.43193613582460877	926284	0.6436243023747054	3.1416692323775865e-21	2.9423695904486333e-18	94.47236180904522	87.52765486725663
CD8_Naive	CYCS	VAF>=0.1	Before	0.6783271836482974	0.2919792586522591	913714	0.6511418509058983	1.8636575636902574e-20	3.0688910540547808e-18	68.28358208955224	45.56913674560734
CD8_TCM	TNFAIP3	VAF>=0.1	After	1.1660064602058167	0.43893411470384414	993128	0.6363265031523913	1.0484911654822502e-21	3.1423280229503038e-18	72.85714285714285	56.969860064585575
CD4_CTL	EGR1	VAF>=0.1	Before	0.4120287444886706	0.36377090994555394	270177	0.6059165997604833	8.160264212404526e-22	4.076051974096061e-18	25.663716814159294	5.093765838824125
NK_CD56high	NR4A2	VAF>=0.1	Before	1.4797148382890215	0.8442950074999992	83193.5	0.7788778414410366	3.347749648972248e-21	5.574003165538793e-18	86.95652173913044	50.301464254952634
Platelet	ACTB	VAF>=0.1	After	4.889884909826442	0.3263411970497909	3.4582e+06	0.605605	2.269298383795992e-20	6.539506977150565e-18	100	100
CD8_Naive	SRSF2	VAF>=0.1	Before	0.7154625482628704	0.2954489226389873	914524	0.6517194394718538	4.676862263051972e-20	7.377134843350926e-18	71.26865671641791	49.19786096256685
CD4_CTL	COTL1	VAF>=0.1	After	0.7267060529286706	0.29420777692924943	902428	0.6270484057455419	9.989688653826004e-21	8.316415804310149e-18	62.311557788944725	39.684734513274336
Treg	DUSP1	VAF>=0.1	Before	2.3084717643234254	0.8304732963815231	310057	0.7167257664088469	7.553701980522274e-21	1.029020219801148e-17	94.47852760736197	76.97814619442352
CD8_Naive	TUBB4B	VAF>=0.1	After	0.4942908393438113	0.2551436949321455	770979	0.6283447432762836	1.748624441349114e-20	1.091797385567353e-17	51.33333333333333	27.995110024449875
CD4_CTL	SRSF7	VAF>=0.1	After	1.1062276349220774	0.3152584999066501	918080	0.6379241339440566	1.726316322979292e-20	1.2934425049922346e-17	85.42713567839196	70.35398230088495
Platelet	FTL	VAF>=0.1	Before	3.2824516450977077	0.3363783853533211	2646727	0.6243779756554758	6.028874536947749e-20	1.5057114156027004e-17	100	99.86581683998658
CD8_TCM	JUN	VAF>=0.1	Before	2.7144461185096356	1.0316103927703872	361371	0.7320537233611539	7.476047855913064e-21	1.8671429520142877e-17	89.28571428571429	81.87748156551334
CD8_Naive	FTH1	VAF>=0.1	After	2.5101928961067674	0.30783629668414614	808081	0.6585827220863896	3.4835795225864017e-20	2.0077476594598934e-17	100	99.78
NK_CD56high	ZFP36	VAF>=0.1	Before	2.92083	1.2028657517495278	84340	0.7896116541212598	1.5585085839140864e-20	2.1231137390865984e-17	100	84.6684
CD4_CTL	YPEL5	VAF>=0.1	After	0.7050878651300353	0.27527288446264403	904195	0.6282761984702272	3.145421804096229e-20	2.244483130208666e-17	65.32663316582915	45.1604
CD8_TCM	ZFP36	VAF>=0.1	Before	2.363061121260194	0.9549658212081606	360264	0.7298101855603274	1.3445479143652917e-20	2.518506312095487e-17	92.85714285714286	80.68633011911514
CD8_TCM	DUSP1	VAF>=0.1	Before	2.3881415203541394	0.9128068971228969	360245	0.7297727088566567	1.3095176328300976e-20	2.518506312095487e-17	95.71428571428572	76.31877481565513
NK_CD56high	TUBB4B	VAF>=0.1	Before	0.9113698207709355	0.5563634468393792	81068	0.7589783919409804	2.0845837952543353e-20	2.6031240143238512e-17	79.34782608695652	40.913
Platelet	PRKAR1B	VAF>=0.1	Before	0.5793291330394722	0.26364997082441605	2540843	0.599399	1.1364857444747193e-19	2.7468127227344625e-17	45.56962025316456	28.692832382869284
NK_CD56high	SRSF7	VAF>=0.1	Before	1.4022603048525073	0.6464190750129138	83313.5	0.780001	2.960725061960015e-20	3.4128050041131404e-17	94.56521739130434	72.696
cDC	ZFP36	VAF>=0.1	Before	2.5574936375988075	0.8678692688118455	77669	0.8392293728659722	2.5388410489672634e-21	3.804453311877444e-17	97.05882352941177	93.82806759735489
CD8_Naive	HSPA8	VAF>=0.1	After	2.027246273299129	0.3375067176117721	805270	0.6562921760391198	9.916803344449311e-20	5.503825856169368e-17	100	95.59902200488997
Platelet	ITGA2B	VAF>=0.1	After	1.0676488927503072	0.31315302280564183	3.41334e+06	0.5977489002367643	2.3070544087120565e-19	5.761868385758361e-17	67.24386724386724	54.18689320388349
Platelet	ACTG1	VAF>=0.1	After	2.8356285303669413	0.2667540048714039	3.44135e+06	0.6026542295352975	2.350096553369288e-19	5.773147024957177e-17	100	99.5874
CD8_TCM	MYADM	VAF>=0.1	After	0.7153397260319848	0.30441437665283766	972434	0.6230672381977549	2.844304313748144e-20	6.08884287735942e-17	60.238095238095234	41.52314316469322
CD8_TCM	EIF1	VAF>=0.1	Before	2.6680739505196525	0.463384	359502	0.7282675634065311	3.800635567215227e-20	6.328058219413353e-17	100	99.80147475893364
CD4_CTL	MYADM	VAF>=0.1	After	0.7892048505059598	0.3094301692115726	903176	0.627568	9.835339737783809e-20	6.69920754412229e-17	64.82412060301507	46.073008849557525
Platelet	GP1BB	VAF>=0.1	After	1.030277854422252	0.29228420939185085	3411725	0.5974665167626333	2.8535839765711243e-19	6.89692836918037e-17	68.25396825396825	54.16262135922331
Treg	RGS1	VAF>=0.1	Before	1.1135214050025461	0.6132276691690678	297819	0.6884364843435767	7.173784576860105e-20	8.958263490354055e-17	68.09815950920245	38.73398643556895
CD8_Naive	EEF2	VAF>=0.1	Before	2.2387400293341844	0.3183753242969729	925828	0.6597750362017263	7.884763111123727e-19	1.1698334180216738e-16	100	97.66997708174179
CD8_Naive	NR4A2	VAF>=0.1	After	0.6767274908215776	0.3577424108277778	770504	0.6279580277098614	2.5727560650998195e-19	1.3768839155543143e-16	50.66666666666667	30.488997555012226
CD8_TCM	CXCR4	VAF>=0.1	After	1.4703556565439904	0.4219262300367459	988884	0.633607	7.6671723802741e-20	1.4361572264800922e-16	83.33333333333334	73.08934337997847
CD8_TCM	PCBP1	VAF>=0.1	After	1.3598413008343029	0.2953307734007351	988950	0.6336501742785381	8.65861261509222e-20	1.4416590004128546e-16	93.80952380952381	82.239
NK_Proliferating	TRBV15	VAF>=0.1	After	0.37165203046723116	0.37165203046723116	18683.5	0.5895522388059702	1.442694264617294e-20	1.5280232740686766e-16	17.91044776119403	0
NK_Proliferating	TRAV17	VAF>=0.1	After	0.3565889151309115	0.3551234876878672	18893	0.5961629484711748	2.0394037691940962e-20	1.5280232740686766e-16	19.402985074626866	0.21141649048625794
CD4_TEM	RPS26	VAF>=0.1	After	2.5109759751426943	0.7976015647928731	105262	0.7624733799817462	1.1042649128521082e-20	1.654740971908884e-16	100	96.11890999174236
CD8_Naive	MTRNR2L12	VAF>=0.1	Before	2.138575987793946	0.5002778609172092	923873	0.6583818398458433	1.5468002959583278e-18	2.2287310033591866e-16	98.88059701492537	88.27349121466769
CD8_Naive	CCNL1	VAF>=0.1	Before	0.6247185360325298	0.263544	900768	0.6419168243959728	1.6592886079255651e-18	2.3680418847394854e-16	66.4179	44.17494270435447
CD8_Naive	DDX5	VAF>=0.1	After	1.6940720664945859	0.3275363328582306	800972	0.6527889160554198	4.852342158085023e-19	2.5073223185828993e-16	99	91.46699266503667
NK_CD56high	GADD45B	VAF>=0.1	Before	1.2872129483414045	0.7310109449592611	81892	0.766693	2.5615796406754285e-19	2.7418050653943786e-16	82.6087	56.33074935400517
CD8_Naive	GIMAP5	VAF>=0.1	Before	0.4579863999134292	-0.295913	487292	0.34726007092117717	2.0725233950841844e-18	2.9025012219940653e-16	52.23880597014925	73.85408708938121
CD8_Naive	ANXA1	VAF>=0.1	After	1.4994314784164338	0.46310547829404736	799356	0.6514722901385493	5.974669554069344e-19	2.984347442257637e-16	82	73.76528117359413
NK_CD56high	PPP1R15A	VAF>=0.1	Before	1.6968148963321237	0.8877997705849724	82443	0.7718514773620941	3.3170100636826496e-19	3.3136930536189667e-16	88.04347826086956	61.240310077519375
CD8_Naive	DNAJA1	VAF>=0.1	After	0.6729816618241571	0.2773108864155204	783952	0.6389180929095355	7.755539299777471e-19	3.748927626037594e-16	68.33333333333333	47.13936430317848
Treg	TNFAIP3	VAF>=0.1	Before	1.1829830519405484	0.5610164474923243	300780	0.6952822686903898	4.078328424968136e-19	4.365267960581966e-16	79.75460122699386	50.15071590052751
CD4_CTL	NR4A2	VAF>=0.1	After	0.717784	0.29664034616578616	891360	0.6193581986258727	7.309457322677155e-19	4.3812887192126865e-16	59.54773869346733	37.88716814159292
CD8_TCM	CSRNP1	VAF>=0.1	Before	0.6474096633227621	0.4007082195783256	332632	0.6738351835345596	3.039460086135888e-19	4.554630939074628e-16	57.14285714285714	25.779920589903572
CD4_CTL	TNFAIP3	VAF>=0.1	After	1.1009143906166985	0.3693618378398069	903537	0.6278189898608084	1.5751069821465985e-18	9.078068510564145e-16	74.62311557788944	54.424778761061944
CD4_TEM	CD8B	VAF>=0.1	Before	0.5069956585307087	0.40543527906416144	96779	0.668594	1.8703887191381071e-19	9.342591652094845e-16	42.66666666666667	10.103626943005182
CD8_TCM	PPP1R15A	VAF>=0.1	Before	1.237699977554672	0.6147914345791927	349032	0.7070567620128029	9.175415663666225e-19	1.1761570122415442e-15	78.57142857142857	51.67328417470222
Erythrocyte	CA1	VAF>=0.1	After	0.26563265655310087	-1.40315	29225.5	0.24408893120526504	8.032737725484697e-20	1.2037057481638818e-15	14.018691588785046	61.751563896336016
NK_CD56high	JUNB	VAF>=0.1	Before	2.540319466729079	0.9929225625368103	82680.5	0.7740750102984684	1.3956053618017748e-18	1.3070716466624747e-15	98.91304347826086	86.90783807062877
CD16_Mono	IFITM3	VAF>=0.1	After	2.7209447533253392	0.28299977415968947	9.95802e+06	0.5709350098316713	2.4418326570085064e-17	1.6940214057996513e-15	98.69431643625191	94.02806808002389
Platelet	ASAH1	VAF>=0.1	Before	0.8691439450932044	0.3088936985315066	2.5765e+06	0.6078099647509708	8.583956882730643e-18	1.8375799126816954e-15	63.0802	47.03119758470312
Platelet	MT-ND1	VAF>=0.1	Before	2.078531788079653	0.2835746836384385	2.60874e+06	0.6154167439257822	1.6552056351059995e-17	3.3977063619264934e-15	98.73417721518987	97.86425136978643
CD8_Naive	SRGN	VAF>=0.1	After	1.0719739305156915	0.3396246351837502	790188	0.644	7.759631254514628e-18	3.523578010572779e-15	81.33333333333333	67.79951100244499
CD8_Naive	H3F3B	VAF>=0.1	After	1.911236455523136	0.28369861845300237	794124	0.6472078239608802	9.856621782020151e-18	4.344161100105058e-15	99	97.26161369193153
CD8_Naive	DUSP2	VAF>=0.1	After	0.7115355617557871	0.3400173255230902	770878	0.628262	1.0904940312571386e-17	4.668872302396635e-15	56.333333333333336	36.5281
NK_CD56high	SRSF2	VAF>=0.1	Before	1.1739973292340253	0.5735266381266424	80977.5	0.7581311088641726	5.936193955739076e-18	5.2325803780441206e-15	89.13043478260869	63.04909560723514
NK_CD56high	NFKBIZ	VAF>=0.1	Before	0.7982848341718752	0.5144938421482221	77273	0.7234486761787066	6.984799521194778e-18	5.814845601394653e-15	68.47826086956522	29.80189491817399
CD4_CTL	PPP1R15A	VAF>=0.1	After	0.9407932855068449	0.3097195599379997	896748	0.6231016809712279	1.3319052053582578e-17	6.8822756904460325e-15	71.85929648241206	51.9358
NK_CD56high	IFRD1	VAF>=0.1	Before	0.857948	0.548677	78114	0.7313223233344568	9.066495875899457e-18	7.150602142123862e-15	71.73913043478261	34.79758828596038
Platelet	YWHAZ	VAF>=0.1	After	1.9530514228256084	0.26160174492901134	3400951	0.59558	4.4099672800428864e-17	9.052515026225021e-15	99.27849927849928	94.93932038834951
Treg	TSC22D3	VAF>=0.1	Before	2.260636963212273	0.6255796549540267	302332	0.6988687061086172	1.1106582097218516e-17	1.1095475515121298e-14	96.93251533742331	89.03541823662397
CD4_CTL	HSP90AA1	VAF>=0.1	After	1.5247243225913134	0.27645078687413127	903488	0.6277845949882154	2.473346750039113e-17	1.235436701644537e-14	96.23115577889448	89.57411504424779
Treg	JUNB	VAF>=0.1	Before	2.693911478907592	0.7378432477587389	302126	0.6983913620371611	1.4773938230591375e-17	1.3836716524088234e-14	97.54601226993866	91.82366239638282
CD8_Naive	ZNF331	VAF>=0.1	Before	0.8116681746624872	0.30902385763306595	895564	0.6382082853494179	1.0612804948450021e-16	1.4073706385179076e-14	70.8955	47.1161
CD8_TCM	HLA-DRB5	VAF>=0.1	After	1.182148060710599	0.36279347513167437	973710	0.6238851299400276	1.1341459176689589e-17	1.5450160523881227e-14	75.71428571428571	65.23143164693218
Platelet	WDR1	VAF>=0.1	After	1.3331060445083032	0.2546425910746868	3.3918e+06	0.5939766072654422	7.78022721765363e-17	1.5544893980871955e-14	91.1977	77.86407766990291
CD8_Naive	EEF2	VAF>=0.1	After	2.2058049878592865	0.306703	791209	0.6448321108394458	4.0167527574397937e-17	1.6719733352843142e-14	100	97.11491442542787
Platelet	NCOA4	VAF>=0.1	Before	1.5411332751116937	0.3814789129868117	2.59088e+06	0.6112032322854875	1.0779501292579299e-16	2.01913533586626e-14	81.22362869198312	70.59152409705915
CD8_Naive	SRSF3	VAF>=0.1	Before	0.6754064398451272	0.25130580309657746	893201	0.6365239786552341	1.63068535579365e-16	2.143492987418232e-14	70.52238805970148	51.05042016806722
Platelet	SOD2	VAF>=0.1	Before	0.8450872338943868	0.2622979134978176	2.56133e+06	0.6042329266790942	1.2484963929684438e-16	2.3097183269916212e-14	67.72151898734177	47.288381974728836
NK_CD56high	YPEL5	VAF>=0.1	Before	1.2124185083749561	0.6686322850161786	79866	0.7477249747219413	3.377687830706719e-17	2.5307326071570094e-14	81.52173913043478	50.99052540913006
Treg	SRGN	VAF>=0.1	Before	1.6827401416499652	0.48396805428390177	300481	0.6945899464172611	3.3925916124275724e-17	2.9904697242486575e-14	95.092	86.24717407686511
Platelet	RNASEK	VAF>=0.1	Before	1.469045118313449	0.25711934046513263	2.58654e+06	0.6101784579410812	1.7183445669446172e-16	3.140169918983548e-14	97.25738396624473	93.00011181930002
CD8_Naive	TXNIP	VAF>=0.1	After	1.887096896273263	-0.336995	437342	0.3564319478402608	8.154632307774314e-17	3.3026260846485974e-14	97.66666666666667	99.16870415647921
Platelet	SRGN	VAF>=0.1	After	2.207171353399228	0.2685487570882201	3391469	0.5939192549629443	1.7086025709574163e-16	3.368869674446958e-14	97.83549783549783	95.75242718446601
Platelet	CDKN1A	VAF>=0.1	Before	0.842141	0.34103967759251363	2.53089e+06	0.5970503059460974	1.8685600793841672e-16	3.3735388903098485e-14	51.0549	36.49781952364978
CD8_TCM	NFKBIA	VAF>=0.1	Before	1.5082035173715447	0.6837316669054295	346880	0.7026993355481728	3.827002022570139e-17	4.096258950586681e-14	82.85714285714286	62.110039705048216
Platelet	PPBP	VAF>=0.1	After	3.5286278241003695	0.43132745286497665	3387504	0.593225	3.1868713104514444e-16	6.201982673651284e-14	98.7013	97.52427184466019
CD4_TCM	FOS	VAF>=0.1	After	1.822948881835809	0.33676059501246325	10969546	0.5700533637762396	1.3116832784052075e-15	7.121584756123925e-14	75.31305903398928	68.21403671856844
NK_CD56high	CSRNP1	VAF>=0.1	Before	0.8277074545251102	0.5104483499849999	77084	0.7216792120735498	1.1465171825395286e-16	8.181219038264207e-14	70.65217391304348	33.33333333333333
CD8_TCM	SRSF2	VAF>=0.1	Before	0.9060222284428953	0.4215351056013846	341807	0.6924216027874565	9.949468500406383e-17	9.939519031905976e-14	80	51.81508791832105
CD4_CTL	GADD45B	VAF>=0.1	Before	1.1168116105887456	0.6115894141804603	318648	0.7146197112344078	5.388281050835309e-17	1.2045745066508824e-13	76.99115044247787	51.368474404460216
NK_CD56high	CLSTN3	VAF>=0.1	After	0.5047769730276125	0.3057149638258797	166084	0.6749262428985932	2.7732411427582993e-17	1.3852339508077706e-13	57.936507936507944	25.448028673835125
CD8_Naive	YWHAZ	VAF>=0.1	Before	1.3093275279324914	0.26865688354307626	900944	0.6420422476996226	1.235427698535517e-15	1.5174495133241578e-13	93.65671641791045	86.74560733384263
CD4_CTL	TRBV7-2	VAF>=0.1	After	0.3498591364891299	0.27572048825600826	779762	0.5418147846533553	3.2136614788794447e-16	1.5534424922905962e-13	11.306532663316583	3.0973451327433628
Platelet	TGFB1	VAF>=0.1	Before	0.9164166543927414	0.25950137311136845	2557982	0.6034425246438886	9.817049878630173e-16	1.6716874139917402e-13	74.47257383966245	53.19244101531925
CD4_CTL	EIF1	VAF>=0.1	Before	2.607071901262661	0.39916650289405275	324518	0.7277841569148101	1.149679331619978e-16	1.9142160871472633e-13	100	99.6452
NK_CD56high	DDX5	VAF>=0.1	Before	2.065099587584176	0.52541	80545.5	0.7540866194809572	3.05789039797033e-16	2.0828403460720635e-13	100	95.77950043066322
CD8_Naive	EIF4A1	VAF>=0.1	Before	1.0722477984479686	0.2740086928427071	896941	0.6391892238577928	2.0220430544775436e-15	2.4634402578330075e-13	91.791	76.75706646294881
CD4_CTL	KLF6	VAF>=0.1	After	1.6320781266922764	0.33084725749820976	895994	0.62257741973140035	5.793415465438291e-16	2.712947835924775e-13	95.22613065326632	85.25995575221239
B	RPS26	VAF>=0.1	Before	1.1874884182075212	-0.385756	3.23469e+06	0.40791645212721617	3.359564967386046e-15	2.876747487787423e-13	89.38193343898574	90.4512
Platelet	IFITM1	VAF>=0.1	Before	1.367104333925277	-0.279051	1665801	0.3929719446791706	2.217258922454793e-15	3.425322160101554e-13	94.51476793248945	96.802
NK_Proliferating	CD8A	VAF>=0.1	After	1.1077208813899801	0.804441	23973.5	0.7564766021898962	6.941707018823144e-17	3.4673826559021606e-13	70.1493	24.947145877378436
CD8_Naive	ADGRE5	VAF>=0.1	After	0.6729654253900418	0.26123067354878016	768400	0.6262424612876936	9.748770323176658e-16	3.4782219831619574e-13	66	46.577017114914426
CD8_TCM	RPS9	VAF>=0.1	Before	2.428805085255826	0.3255140849988325	346570	0.702071	3.7344835459986326e-16	3.4975772460493444e-13	100	99.31934203062961
Treg	CD69	VAF>=0.1	Before	1.6052404364555717	0.6064588096616459	296519	0.6854314127072921	4.776174106459013e-16	3.976164943627128e-13	83.43558282208589	67.59608138658628
Treg	JUND	VAF>=0.1	Before	0.5246611739076243	0.2816324948015919	282637	0.6533418708189052	5.356610093035835e-16	4.2246738023232623e-13	57.05521472392638	29.314242652599848
CD8_Naive	JUNB	VAF>=0.1	After	2.2878409142762717	0.4812391129458857	782371	0.6376291768541157	1.380162093968208e-15	4.700392949571272e-13	95.33333333333334	90
gdT	EGR1	VAF>=0.1	Before	1.0520470839430538	0.9613945669664588	18177.5	0.7531281073914484	3.174507307039001e-17	4.756999199597943e-13	57.14285714285714	9.396751740139212
Treg	H3F3B	VAF>=0.1	Before	2.2538931057041616	0.38503291568186016	297402	0.6874737056231826	6.700555532440953e-16	5.020391232681384e-13	99.38650306748467	98.45516201959306
Platelet	SPARC	VAF>=0.1	After	1.6198201843328182	0.29613850695973376	3365362	0.5893473570658037	3.102212175347167e-15	5.343293039951413e-13	86.43578643578643	77.85194174757282
cDC	RABGEF1	VAF>=0.1	Before	1.0149739353123322	0.5923497987756883	71188.5	0.769206	1.807408656822157e-16	5.416803744496004e-13	86.76470588235294	44.74650991917707
NK_CD56high	FOSB	VAF>=0.1	Before	1.1378610731226089	0.6420503830469679	77929.5	0.7295949893270419	9.928707095439824e-16	6.468768514137641e-13	81.52173913043478	43.238587424633934
CD8_Naive	MT-ND4L	VAF>=0.1	Before	2.387736959762308	0.27442218006888064	898805	0.6405175706646294	6.7494974418411684e-15	7.963875524881095e-13	100	99.14056531703591
Platelet	FERMT3	VAF>=0.1	After	1.3025326481071944	0.2711286584503152	3.356e+06	0.5877074314574314	5.7309418501357745e-15	9.234211142396191e-13	81.52958152958153	71.22572815533981
CD8_TCM	TNFAIP3	VAF>=0.1	Before	1.398743022605834	0.6458117664165245	340068	0.6888977797585285	1.1516704454033682e-15	9.58765645798304e-13	77.14285714285715	53.17640385706183
CD4_CTL	JUN	VAF>=0.1	Before	2.459255435056901	1.0010042847648968	321171	0.7202790772777631	7.126142338616066e-16	9.70774935856016e-13	91.1504	74.93664470349721
CD4_CTL	ITGB2	VAF>=0.1	After	1.7189330596018788	0.25351719440425957	892118	0.6198845444034331	2.4721246112359742e-15	1.058422494267745e-12	98.24120603015075	93.58407079646017
CD4_TCM	JUN	VAF>=0.1	After	1.6059967819657088	0.2763009545043984	10911722	0.567048	2.7859764096958372e-14	1.2351436834110096e-12	78.44364937388193	73.80897048570765
Treg	YPEL5	VAF>=0.1	Before	0.9541508329003081	0.4271296500716121	291427	0.673661	1.746549580942648e-15	1.2462878795440752e-12	73.61963190184049	52.52449133383572
CD4_TEM	CD8A	VAF>=0.1	Before	0.5335322713690467	0.4072287700708519	95574.5	0.6602728842832469	5.731781207040127e-16	1.717814827749926e-12	42.66666666666667	11.761658031088084
NK_Proliferating	CD8B	VAF>=0.1	After	0.6715300573070667	0.5267913668687296	22169	0.6995361459089331	4.846106523055164e-16	1.8154726561995408e-12	50.74626865671642	12.050739957716702
CD4_CTL	MALAT1	VAF>=0.1	After	3.845344083029265	-0.284411	547623	0.3805136023035532	4.62115397027104e-15	1.8223155853818826e-12	100	100
Erythrocyte	AHSP	VAF>=0.1	After	0.2660776653405774	-0.926351	32640	0.2726065495727995	2.9636037656365004e-16	2.220480121403148e-12	13.084112149532709	58.62377122430742
cDC	DUSP1	VAF>=0.1	Before	2.377964774592356	0.7760081746129532	72900.5	0.7877047586117474	8.898613221833974e-16	2.222428652153035e-12	97.05882352941177	88.7583
CD8_TCM	BTG2	VAF>=0.1	Before	1.0546086756179882	0.4974771763801802	336891	0.6824629284498825	3.1523317353519465e-15	2.486194266013101e-12	75	49.26262053318208
CD8_TCM	PRF1	VAF>=0.1	After	1.2373881516652605	0.29275794213174666	960225	0.6152448869752422	3.1584347133096445e-15	3.38065315563893e-12	87.61904761904762	73.11625403659849
CD8_TCM	TSC22D3	VAF>=0.1	After	1.665133316242407	0.3874781589424052	961576	0.6161101927315598	3.519396712707086e-15	3.515877315994379e-12	89.04761904761904	79.41334768568353
Platelet	CLU	VAF>=0.1	After	1.7720683762981824	0.3055291013049002	3350006	0.5866581907844044	2.321141962924475e-14	3.585805393239511e-12	88.31168831168831	80.94660194174757
CD8_TCM	JUNB	VAF>=0.1	Before	2.602069366956046	0.7517071621226583	342750	0.6943329146746617	4.9534426515486765e-15	3.711366906672846e-12	95	90.2439
Platelet	TREML1	VAF>=0.1	After	1.1695868614547493	0.2682227543120098	3338049	0.5845642625982432	2.4949950779583453e-14	3.815051147265898e-12	71.86147186147186	62.57281553398059
Treg	DUSP4	VAF>=0.1	Before	0.5573498974311504	0.34076477421440987	272908	0.6308512212148811	6.754176506389729e-15	4.2171389561770865e-12	44.785276073619634	20.346646571213263
cDC	FOS	VAF>=0.1	Before	3.294005720089198	0.6958916419405892	72639	0.7848791978216709	1.980674915436519e-15	4.240059086830891e-12	98.52941176470588	98.53049228508449
NK_CD56high	BTG2	VAF>=0.1	Before	1.4173684145535257	0.7212567778486928	77987	0.7301333183537431	8.947307843939181e-15	5.363016321657145e-12	84.78260869565217	52.368647717484926
CD4_TEM	RPS19	VAF>=0.1	Before	3.72941	0.4900108309579463	111160	0.767945	3.0612969900238974e-15	5.734191924438513e-12	100	100
Platelet	CTSA	VAF>=0.1	Before	1.697481113453201	0.325259	2552238	0.6020874823247657	4.364444851726731e-14	6.475366940903471e-12	84.38818565400844	81.40445040814045
CD8_TCM	TUBA4A	VAF>=0.1	After	0.8251661313545343	0.271182	949668	0.6084803808498641	1.1191699697154409e-14	9.317089997881046e-12	68.57142857142857	55.6243
CD4_CTL	HLA-DRB1	VAF>=0.1	After	1.1263829452085525	0.2858824035171782	883066	0.6135947992173255	2.5452448435472045e-14	9.535123495138716e-12	84.17085427135679	69.99446902654867
Treg	MYADM	VAF>=0.1	Before	0.7097926371983603	0.36575709487322655	281706	0.6511909330053952	1.6027483369171282e-14	9.606873531481266e-12	59.50920245398773	33.00678221552374
Platelet	PF4	VAF>=0.1	After	1.8057646045875926	0.32533975881647104	3.34073e+06	0.5850329753849172	6.807045915256996e-14	9.808036830781354e-12	86.86868686868688	79.76941747572816
Platelet	ARPC1B	VAF>=0.1	Before	2.4947466022004163	0.30260439274400985	2548499	0.6012054309265762	9.515326449645447e-14	1.3579730175994003e-11	97.8903	98.401
Platelet	SPARC	VAF>=0.1	Before	1.7993363475934325	0.3472578380610958	2.54515e+06	0.6004157366084593	1.13479792635974e-13	1.5892473763084767e-11	84.59915611814345	79.85016213798501
CD8_Naive	GATA3	VAF>=0.1	Before	0.7788729250098755	0.27956	875088	0.6236157115492058	1.610208525872692e-13	1.64142685443553e-11	68.28358208955224	49.40794499618029
Treg	NFKBIA	VAF>=0.1	Before	1.1294492197540498	0.48397591964037434	289099	0.668279	3.120078012676768e-14	1.7316432970356064e-11	75.4601	56.10399397136398
CD8_TCM	NR4A2	VAF>=0.1	After	0.7434846200685106	0.2870052998891082	938258	0.6011699728330514	2.6956981387283708e-14	2.126054558360244e-11	55.47619047619048	40.60818083961249
Platelet	IFI30	VAF>=0.1	Before	0.9183449524265934	0.28803549709079146	2522930	0.5951735581797705	1.7191896783430722e-13	2.3209060657631477e-11	72.36286919831224	61.276976406127694
Platelet	MALAT1	VAF>=0.1	Before	2.992023079801561	-0.354313	1694972	0.39985354974378284	1.825028782585231e-13	2.441790741699972e-11	99.36708860759494	99.65336016996534
Platelet	CALM3	VAF>=0.1	Before	1.7727920497263798	0.28646312992865064	2541190	0.5994811961928596	2.0139850595909756e-13	2.647330361225506e-11	94.72573839662446	89.23180140892319
CD8_TCM	ANXA1	VAF>=0.1	After	1.457477954129914	0.29840772555202877	954288	0.611441	3.8049441242985175e-14	2.8508543851306643e-11	91.19047619047619	81.10871905274489
CD4_TEM	JUN	VAF>=0.1	Before	2.8422111629956257	1.0817415830261499	109902	0.7592573402417963	1.8855424467894956e-14	3.1394281739045103e-11	96	81.55440414507773
CD8_TCM	RPS19	VAF>=0.1	Before	3.4164702495982553	0.3527209368269313	339269	0.6872802041973908	5.003522154027587e-14	3.408080885368336e-11	100	100
CD8_TCM	ZFP36	VAF>=0.1	After	1.679937943337937	0.3953501681405709	953306	0.6108119970270132	5.3327157105204105e-14	3.710628335760651e-11	85.95238095238096	79.65554359526372
CD4_CTL	DUSP2	VAF>=0.1	After	1.2658165933617695	0.37480844475965003	877892	0.6099993190510072	1.1416697797543208e-13	3.888164011276931e-11	73.61809045226131	62.38938053097345
CD8_Naive	DDIT4	VAF>=0.1	Before	0.7476280571564681	0.2640553497128843	871746	0.6212344503608771	4.4308828877562196e-13	4.2836632305178676e-11	67.91044776119402	49.90450725744843
CD8_Naive	MALAT1	VAF>=0.1	After	3.521180077373987	-0.405284	457277	0.37267889160554196	1.6672816300361992e-13	4.542584586562263e-11	99.33333333333333	100
NK_CD56high	SRSF5	VAF>=0.1	Before	1.4957561508050805	0.44399410983664267	77844.5	0.7287991985919186	9.475992354248868e-14	5.2591757566081216e-11	93.47826086956522	88.11369509043928
CD8_TCM	IER2	VAF>=0.1	Before	1.5116289227038853	0.5367504387554297	336842	0.6823626529454664	9.295348159454476e-14	5.803783007059388e-11	87.14285714285714	77.33976176971072
CD8_TCM	TSC22D3	VAF>=0.1	Before	2.0291968868051367	0.534618	337409	0.6835122761526619	1.2807778437317578e-13	7.381713841661688e-11	95.71428571428572	87.43618831537152
Platelet	TIMP1	VAF>=0.1	Before	1.5895806594573982	0.3144659810828132	2531060	0.5970914714900889	6.143658495998373e-13	7.736363240549213e-11	86.49789029535864	79.64888739796488
Platelet	ITGA2B	VAF>=0.1	Before	1.2005449903294896	0.3116570293712967	2.51992e+06	0.5944643077040667	7.110309711450712e-13	8.805619093065199e-11	69.62025316455697	60.617242536061724
Platelet	PARVB	VAF>=0.1	After	0.9662276559547512	0.25077571304394686	3294147	0.5768760769974363	6.789273590005944e-13	8.924321468968338e-11	61.327561327561334	50.07281553398059
MAIT	EGR1	VAF>=0.1	Before	0.9681884631406952	0.8606083282462593	23608	0.7028700726449922	3.707382212593799e-14	9.259187075953013e-11	47.22222222222222	9.753483386923902
NK_CD56high	HLA-DRB5	VAF>=0.1	After	1.2264025204231077	0.5380577090020624	170507	0.6928981867537936	4.276031039878588e-14	9.710679175509272e-11	80.95238095238095	60.26625704045059
NK_CD56high	CD69	VAF>=0.1	Before	2.27739	0.918144	77751	0.7279238287832828	2.0184274719960089e-13	1.080219130995007e-10	93.47826086956522	78.29457364341084
CD8_Naive	MT-ND1	VAF>=0.1	Before	1.9303736921487171	0.258315	880914	0.6277678642691812	1.2427449633465994e-12	1.1495390910956045e-10	98.88059701492537	96.48586707410237
CD8_TCM	SLC2A3	VAF>=0.1	Before	0.863566	0.4046827972763986	329238	0.6669587148529292	2.0803902261134216e-13	1.154616575492949e-10	70	46.17129892229155
CD4_CTL	CD69	VAF>=0.1	After	1.2311596953994601	0.2989503419319326	875248	0.6081621464624005	4.0787511833019805e-13	1.2033134924246236e-10	81.90954773869346	66.3717
cDC	H3F3B	VAF>=0.1	After	2.296715096368461	0.3459521442661686	44509	0.7509025879812397	9.349276682920226e-15	1.400989110935596e-10	100	99.84984984984985
CD8_TCM	CHMP1B	VAF>=0.1	Before	0.43942399871703397	0.26253413442649687	311798	0.6316313507819463	3.0892394961974897e-13	1.6532947803756923e-10	45.714285714285715	21.384004537719793
cDC	CDKN1A	VAF>=0.1	Before	1.3253173004905408	0.6727523453441479	69778	0.7539655097895146	1.1836524485146708e-13	1.970781326776927e-10	89.70588235294117	55.69434239529758
CD8_Naive	TSC22D3	VAF>=0.1	After	1.707013639693801	0.36286776687672506	764108	0.6227444987775062	8.3945123853702e-13	1.9966947316630546e-10	94	86.69926650366749
Erythrocyte	SELENBP1	VAF>=0.1	After	0.17993293791184947	-0.576349	35158	0.29363667493506385	4.02560066745168e-14	2.0107875333921143e-10	12.149532710280374	53.70866845397676
Treg	DDIT4	VAF>=0.1	Before	0.7790441465728863	0.42840601080844753	279162	0.6453102389725429	4.210771583682054e-13	2.0354326510153414e-10	57.05521472392638	35.64431047475509
CD4_CTL	EEF1A1	VAF>=0.1	Before	4.2200696656074905	0.2752441983920271	313310	0.7026506061924476	1.8702500319506158e-13	2.1558228252907675e-10	100	100
CD8_Naive	FOS	VAF>=0.1	After	1.9773375862800204	0.5276217739992715	762612	0.6215260798696006	1.050595713253282e-12	2.459871369234442e-10	82.66666666666667	71.32029339853301
Plasmablast	IGKV1D-39	VAF>=0.1	After	0.42091197874830927	0.42091197874830927	1899	0.5625	4.301834441596783e-13	3.3927889003856736e-10	12.5	0
CD8_TEM	CCL4	VAF>=0.1	Before	1.576859207733305	0.4044228993140686	6069188	0.5717356731849486	8.724109581315144e-12	3.8113930634404503e-10	77.60617760617761	77.8144
CD8_TCM	CD69	VAF>=0.1	Before	1.7304213575909275	0.5617283912597362	333962	0.6765284417794344	7.450347844582599e-13	3.849774567278285e-10	91.42857142857143	77.99205899035735
CD4_CTL	ACTG1	VAF>=0.1	After	2.5118848515284364	0.2670517258655343	874752	0.6078178503135144	1.4413270504649452e-12	3.999682565040223e-10	99.74874371859298	98.8108
Platelet	TPM4	VAF>=0.1	After	1.560251491926375	0.27762097862946544	3304371	0.5786665195645778	3.4604551443211446e-12	4.115469868067647e-10	81.38528138528139	75.49757281553397
CD8_Naive	ZFP36L2	VAF>=0.1	After	1.8471372312391607	0.2840815696499681	761814	0.6208748981255093	2.036020103035634e-12	4.5536957080580554e-10	95	93.98533007334964
CD8_TCM	SRSF7	VAF>=0.1	After	1.1023105038465977	0.257066	942047	0.603598	1.0100873891669732e-12	4.565443092726334e-10	82.61904761904762	72.6319
CD8_Naive	TAGLN2	VAF>=0.1	Before	1.3858249524410566	0.274109	873593	0.622551	6.864114150282268e-12	5.811228844179648e-10	90.29850746268657	83.89992360580595
CD8_TCM	H3F3B	VAF>=0.1	Before	2.3380164525636986	0.3580627896872983	333870	0.6763420711449639	1.1756888362961066e-12	5.872565737299053e-10	100	99.12081678956325
CD4_TEM	FOS	VAF>=0.1	Before	3.0782429644138904	1.1812	107578	0.7431951640759931	6.033521318751644e-13	5.953785957933633e-10	96	77.30569948186529
CD4_CTL	IER2	VAF>=0.1	Before	1.6664242661122874	0.6653508858948578	309839	0.6948651933850343	6.859449441630029e-13	6.852589992188399e-10	89.38053097345133	78.02838317283324
Treg	DNAJB1	VAF>=0.1	Before	1.361778581048337	0.4419480791397785	286103	0.6613538541199532	1.6258766926551429e-12	7.382958254374944e-10	85.2761	71.59005275056518
Platelet	WDR1	VAF>=0.1	Before	1.4284213829619188	0.2619554232546546	2510890	0.592333	6.942048201960641e-12	7.880802447453045e-10	91.77215189873418	80.07380073800738
Erythrocyte	DCAF12	VAF>=0.1	Before	1.7781656343720575	0.6140622248414425	69837	0.7124770455009182	6.050230556160044e-14	9.066270488405826e-10	93.10344827586206	72.66272189349112
CD8_TCM	SRSF7	VAF>=0.1	Before	1.3377643810184572	0.41290408966644887	331546	0.6716362126245847	2.001725387488436e-12	9.373704666098191e-10	90	77.96369824163358
CD8_TCM	DNAJB1	VAF>=0.1	After	1.087690158770748	0.2554911892971453	938626	0.6014060818083962	2.733071776903737e-12	9.524437343465698e-10	80.95238095238095	70.66738428417653
CD8_TCM	DDIT4	VAF>=0.1	Before	0.7178238248235581	0.33802486255992353	322270	0.6528451908273235	2.1820709495113232e-12	9.617156817184465e-10	65.71428571428571	38.088485536018155
cDC	H3F3A	VAF>=0.1	After	2.3233903681222925	0.262119	43748.5	0.7380723420049263	1.9629478867424513e-13	9.804924694278545e-10	100	100
Treg	GIMAP7	VAF>=0.1	Before	0.523601	-0.397862	147070	0.33996722160322884	2.3775937290447023e-12	1.0478894714627902e-9	51.533742331288344	72.0422
cDC	RGS1	VAF>=0.1	After	0.8444559691724789	0.5647318055187796	41192.5	0.6949505685460742	3.167998035018119e-13	1.1868112638686627e-9	59.55056179775281	27.627627627627625
CD8_Naive	TUBA1A	VAF>=0.1	After	0.8859982661338577	0.29256126044118846	751863	0.6127652811735941	5.832927533699624e-12	1.1973482067464229e-9	69.33333333333334	57.775061124694375
Treg	HSP90AA1	VAF>=0.1	Before	1.4577408453791132	0.35013288180217295	285325	0.6595554343253152	3.6003989907959186e-12	1.4986660799188011e-9	95.092	87.37754333082141
cDC	NR4A1	VAF>=0.1	Before	1.233066829629365	0.6501104601232097	68452.5	0.7396432121709815	1.105042555076859e-12	1.5053693352569756e-9	83.82352941176471	50.62454077883909
CD8_Naive	CXCR4	VAF>=0.1	After	1.264200784977709	0.2986606202735561	755834	0.6160012224938876	8.237951272763659e-12	1.6031909067839404e-9	83.33333333333334	75.55012224938875
CD8_TCM	SNHG5	VAF>=0.1	Before	0.6911580014811726	0.3049803434192403	323590	0.6555171785106555	4.011947927376971e-12	1.6248389105876732e-9	68.57142857142857	45.09359047078843
CD8_Naive	KLF2	VAF>=0.1	Before	1.0659943206948659	0.25442	867385	0.6181266604335085	2.0278289639180035e-11	1.6249741724230633e-9	84.70149253731343	72.68907563025209
cDC	FCER1A	VAF>=0.1	After	0.9882345244017021	0.619928	39943.5	0.6738789351148902	5.440636785813676e-13	1.6305588447083588e-9	55.0562	18.91891891891892
cDC	PPP1R15A	VAF>=0.1	Before	1.2415002898749252	0.553923	68952.5	0.7450458140640532	1.4692886153328542e-12	1.8347741583969016e-9	91.17647058823529	65.61351947097722
cDC	NAMPT	VAF>=0.1	Before	1.3760845320735762	0.630477	68953	0.7450512166659463	1.6180435114643772e-12	1.8651063091764378e-9	91.17647058823529	60.98457016899339
CD8_TCM	NKG7	VAF>=0.1	After	3.0118747056027977	0.31845245410969314	939699	0.602093	6.363596919131269e-12	2.028904251769831e-9	99.52380952380952	97.47039827771798
Erythrocyte	HBM	VAF>=0.1	After	0.2217218182465089	-0.751306	36437	0.30431877594314016	5.576316710824535e-13	2.0890276477926415e-9	13.084112149532709	51.921358355674705
CD8_TCM	RPS18	VAF>=0.1	Before	3.2780159558581903	0.27325486925723697	331238	0.6710102503848959	6.10327901873475e-12	2.3890842792390962e-9	100	100
NK_CD56high	HLA-A	VAF>=0.1	After	3.3367595667503487	0.2547936118821492	169220	0.6876681377449426	1.4896706535752382e-12	2.4803016382027715e-9	100	100
CD8_TCM	GZMB	VAF>=0.1	After	0.7161823006992553	0.25461556485749237	918041	0.5882163360500282	9.065800905822205e-12	2.7724699300764434e-9	51.66666666666667	36.329386437029065
CD8_TCM	LINC02446	VAF>=0.1	Before	0.7422855823101292	0.38943343275376374	314009	0.6361093104286525	8.185775610821467e-12	3.066596188203992e-9	52.85714285714286	28.02041973908111
CD4_CTL	CXCR4	VAF>=0.1	After	1.3037007491122463	0.3190857356292993	864511	0.6007019333392627	1.3635439627338907e-11	3.192610356494899e-9	78.89447236180904	64.29756637168141
Erythrocyte	PRDX6	VAF>=0.1	Before	1.0987967813345596	0.46568091363039743	68517.5	0.6990155070393798	4.296676844027916e-13	3.219285125387916e-9	84.48275862068965	57.514792899408285
cDC	SOCS3	VAF>=0.1	Before	0.7125690486448325	0.4187181552803032	65879	0.7118360202273415	3.3228887869396266e-12	3.319565898152687e-9	69.11764705882352	33.798677443056576
cDC	LAPTM5	VAF>=0.1	Before	1.6810712988476098	0.38388029336217055	69040	0.7459912693953408	3.225323345859083e-12	3.319565898152687e-9	100	94.93019838354151
cDC	JUNB	VAF>=0.1	Before	2.350427590393241	0.5675265215733643	69231.5	0.7480604659203872	4.128272969533748e-12	3.86638565302895e-9	97.05882352941177	96.17927994121969
Platelet	S100A8	VAF>=0.1	Before	1.4816269479768687	0.405487	2.4943e+06	0.5884206396724496	3.795029919698403e-11	3.9219671273572805e-9	77.63713080168776	73.23045957732305
Erythrocyte	SLC4A1	VAF>=0.1	Before	1.070986897457018	0.5158627954380101	67202.5	0.6855998775760049	7.994458315039065e-13	3.993231928362013e-9	76.72413793103449	39.408284023668635
Platelet	PDLIM1	VAF>=0.1	Before	1.0478384217852494	0.2572727443774854	2.48342e+06	0.585853	4.3163103346479254e-11	4.370264213831024e-9	68.56540084388185	56.51347422565135
MAIT	FOSB	VAF>=0.1	Before	1.5598797694420952	1.0407722544772884	27131	0.8077587233535787	5.068990277564224e-12	4.402075623980367e-9	83.33333333333334	43.30117899249732
MAIT	PPP1R15A	VAF>=0.1	Before	1.5618810079321415	0.9683381769286308	27448	0.8171966178397047	5.287778527303744e-12	4.402075623980367e-9	91.66666666666666	50.482315112540185
Platelet	RUFY1	VAF>=0.1	Before	0.9910728179135619	0.2690979396043227	2.47365e+06	0.5835487152339878	4.9845343702798066e-11	4.979549835909527e-9	62.447257383966246	49.51358604495136
CD4_TEM	ATF3	VAF>=0.1	Before	0.36862305143562524	0.30322957116797333	88117	0.6087530224525043	7.310896478231526e-12	5.4776891863149714e-9	28.000000000000004	7.098445595854923
cDC	IER3	VAF>=0.1	Before	0.7922043499151211	0.5318059589911549	64742	0.6995505035224965	7.1756243482535186e-12	6.3251018152105286e-9	61.76470588235294	29.09625275532697
Treg	JUN	VAF>=0.1	Before	2.119198309042381	0.6615	283534	0.6554165260447247	1.8511100495797678e-11	6.604496212607814e-9	86.50306748466258	77.88244159758855
Treg	TENT5C	VAF>=0.1	Before	0.750981	0.29825528178996646	278360	0.643456	1.910633546563245e-11	6.6583357430814476e-9	71.16564417177914	46.60889223813112
NK_CD56high	NEAT1	VAF>=0.1	Before	1.1457963192531537	0.44336506564085865	75233.5	0.7043543796577164	1.4006609896435604e-11	6.996301643269584e-9	86.95652173913044	68.13092161929372
CD8_TCM	KLF6	VAF>=0.1	Before	1.7351328945821856	0.44638842097435627	328398	0.6652570699295033	2.1469780724347758e-11	7.311924185326163e-9	91.42857142857143	86.04651162790698
cDC	SRGN	VAF>=0.1	After	2.1670126277540835	0.3377946517930477	43006	0.7255457704895907	3.3619592189213416e-12	8.39649314925605e-9	100	99.3994
CD8_Naive	JUN	VAF>=0.1	After	1.845120370847867	0.42329162076992777	751886	0.6127844335778321	4.763056465334271e-11	8.39698836859224e-9	85.33333333333334	77.75061124694376
cDC	FOSB	VAF>=0.1	Before	1.716812948739854	0.7292593690148742	68427.5	0.739373	1.067816368153993e-11	8.889571264881992e-9	89.70588235294117	67.89125642909625
CD8_TCM	CD69	VAF>=0.1	After	1.464211021274895	0.30235580884087754	932547	0.597511	3.3490553974008843e-11	8.961713416080759e-9	88.33333333333333	79.35952637244348
NK_CD56high	SAT1	VAF>=0.1	Before	0.875693	0.40864927327427614	74162.5	0.6943274163951616	2.0314614146287764e-11	9.819822354262003e-9	79.34782608695652	49.69853574504737
NK_CD56high	EGR1	VAF>=0.1	Before	0.6895339923597771	0.48715969299164746	68203	0.638533	2.1677855203477605e-11	1.0151333132003497e-8	41.30434782608695	15.590008613264427
Treg	EEF2	VAF>=0.1	After	2.179485377039934	0.30847960093288496	297532	0.6547666204528949	1.3745504613077152e-12	1.0298819331348056e-8	100	96.8724
Treg	TUBB4B	VAF>=0.1	Before	0.7591928018177945	0.33174561405513386	277301	0.641007	3.1981071912882334e-11	1.0649696946989817e-8	67.48466257668711	46.53353428786737
Treg	SLC2A3	VAF>=0.1	Before	0.9331569393346949	0.3529484626994167	279570	0.6462510575540567	3.292809705386907e-11	1.072668552939626e-8	74.23312883435584	55.23737754333082
HSPC	IPO13	VAF>=0.1	After	0.6931471805599453	0.6931471805599453	46	1	3.2474896483376744e-11	1.2806219047457909e-8	100	0
HSPC	AK5	VAF>=0.1	After	0.6931471805599453	0.6931471805599453	46	1	3.2474896483376744e-11	1.2806219047457909e-8	100	0
HSPC	AC010969.2	VAF>=0.1	After	0.6931471805599453	0.6931471805599453	46	1	3.2474896483376744e-11	1.2806219047457909e-8	100	0
HSPC	PNO1	VAF>=0.1	After	0.6931471805599453	0.6931471805599453	46	1	3.2474896483376744e-11	1.2806219047457909e-8	100	0
HSPC	TNS1	VAF>=0.1	After	0.6931471805599453	0.6931471805599453	46	1	3.2474896483376744e-11	1.2806219047457909e-8	100	0
HSPC	GRAMD2B	VAF>=0.1	After	0.6931471805599453	0.6931471805599453	46	1	3.2474896483376744e-11	1.2806219047457909e-8	100	0
HSPC	SLC22A5	VAF>=0.1	After	0.6931471805599453	0.6931471805599453	46	1	3.2474896483376744e-11	1.2806219047457909e-8	100	0
HSPC	AL645933.3	VAF>=0.1	After	0.6931471805599453	0.6931471805599453	46	1	3.2474896483376744e-11	1.2806219047457909e-8	100	0
HSPC	PRICKLE4	VAF>=0.1	After	0.6931471805599453	0.6931471805599453	46	1	3.2474896483376744e-11	1.2806219047457909e-8	100	0
HSPC	AL590617.2	VAF>=0.1	After	0.6931471805599453	0.6931471805599453	46	1	3.2474896483376744e-11	1.2806219047457909e-8	100	0
HSPC	ELMO1-AS1	VAF>=0.1	After	0.6931471805599453	0.6931471805599453	46	1	3.2474896483376744e-11	1.2806219047457909e-8	100	0
HSPC	DENND11	VAF>=0.1	After	0.6931471805599453	0.6931471805599453	46	1	3.2474896483376744e-11	1.2806219047457909e-8	100	0
HSPC	FAM27C	VAF>=0.1	After	0.6931471805599453	0.6931471805599453	46	1	3.2474896483376744e-11	1.2806219047457909e-8	100	0
HSPC	ZNF484	VAF>=0.1	After	0.6931471805599453	0.6931471805599453	46	1	3.2474896483376744e-11	1.2806219047457909e-8	100	0
HSPC	SLC2A8	VAF>=0.1	After	0.6931471805599453	0.6931471805599453	46	1	3.2474896483376744e-11	1.2806219047457909e-8	100	0
HSPC	SLC25A22	VAF>=0.1	After	0.6931471805599453	0.6931471805599453	46	1	3.2474896483376744e-11	1.2806219047457909e-8	100	0
HSPC	DDB2	VAF>=0.1	After	0.6931471805599453	0.6931471805599453	46	1	3.2474896483376744e-11	1.2806219047457909e-8	100	0
HSPC	IL18BP	VAF>=0.1	After	0.6931471805599453	0.6931471805599453	46	1	3.2474896483376744e-11	1.2806219047457909e-8	100	0
HSPC	KCNH3	VAF>=0.1	After	0.6931471805599453	0.6931471805599453	46	1	3.2474896483376744e-11	1.2806219047457909e-8	100	0
HSPC	ZNF268	VAF>=0.1	After	0.6931471805599453	0.6931471805599453	46	1	3.2474896483376744e-11	1.2806219047457909e-8	100	0
HSPC	RFC3	VAF>=0.1	After	0.6931471805599453	0.6931471805599453	46	1	3.2474896483376744e-11	1.2806219047457909e-8	100	0
HSPC	ALG11	VAF>=0.1	After	0.6931471805599453	0.6931471805599453	46	1	3.2474896483376744e-11	1.2806219047457909e-8	100	0
HSPC	GAS6-AS1	VAF>=0.1	After	0.6931471805599453	0.6931471805599453	46	1	3.2474896483376744e-11	1.2806219047457909e-8	100	0
HSPC	CHST14	VAF>=0.1	After	0.6931471805599453	0.6931471805599453	46	1	3.2474896483376744e-11	1.2806219047457909e-8	100	0
HSPC	VPS18	VAF>=0.1	After	0.6931471805599453	0.6931471805599453	46	1	3.2474896483376744e-11	1.2806219047457909e-8	100	0
HSPC	AC103691.1	VAF>=0.1	After	0.6931471805599453	0.6931471805599453	46	1	3.2474896483376744e-11	1.2806219047457909e-8	100	0
HSPC	SMCR8	VAF>=0.1	After	0.6931471805599453	0.6931471805599453	46	1	3.2474896483376744e-11	1.2806219047457909e-8	100	0
HSPC	AC004596.1	VAF>=0.1	After	0.6931471805599453	0.6931471805599453	46	1	3.2474896483376744e-11	1.2806219047457909e-8	100	0
HSPC	AC020911.2	VAF>=0.1	After	0.6931471805599453	0.6931471805599453	46	1	3.2474896483376744e-11	1.2806219047457909e-8	100	0
HSPC	C19orf44	VAF>=0.1	After	0.6931471805599453	0.6931471805599453	46	1	3.2474896483376744e-11	1.2806219047457909e-8	100	0
HSPC	VSTM1	VAF>=0.1	After	0.6931471805599453	0.6931471805599453	46	1	3.2474896483376744e-11	1.2806219047457909e-8	100	0
HSPC	LINC01431	VAF>=0.1	After	0.6931471805599453	0.6931471805599453	46	1	3.2474896483376744e-11	1.2806219047457909e-8	100	0
HSPC	MIS18A	VAF>=0.1	After	0.6931471805599453	0.6931471805599453	46	1	3.2474896483376744e-11	1.2806219047457909e-8	100	0
HSPC	USP18	VAF>=0.1	After	0.6931471805599453	0.6931471805599453	46	1	3.2474896483376744e-11	1.2806219047457909e-8	100	0
HSPC	TRBV15	VAF>=0.1	After	0.6931471805599453	0.6931471805599453	46	1	3.2474896483376744e-11	1.2806219047457909e-8	100	0
HSPC	AL139099.1	VAF>=0.1	After	0.6931471805599453	0.6931471805599453	46	1	3.2474896483376744e-11	1.2806219047457909e-8	100	0
HSPC	SEMA7A	VAF>=0.1	After	0.6931471805599453	0.6931471805599453	46	1	3.2474896483376744e-11	1.2806219047457909e-8	100	0
HSPC	PHYHD1	VAF>=0.1	After	0.6931471805599453	0.6931471805599453	46	1	3.2474896483376744e-11	1.2806219047457909e-8	100	0
cDC	NFKBIA	VAF>=0.1	Before	1.688407710055472	0.65928	68314.5	0.7381520940484938	1.6348976844462836e-11	1.289417989548819e-8	94.11764705882352	79.79426891991183
CD8_TCM	UBC	VAF>=0.1	Before	2.2620594924369803	0.29828165201230084	327741	0.6639271533911353	3.8771677170886736e-11	1.2910968497905283e-8	100	98.49688031764039
MAIT	FOS	VAF>=0.1	Before	3.485715302839052	1.8522356091943901	27734.5	0.8257264499225914	1.648338908659501e-11	1.3000188708559276e-8	97.22222222222221	69.239
Treg	HLA-DRB5	VAF>=0.1	Before	0.8903121464088786	0.3441741447351161	277489	0.6414417871392181	4.630221197673762e-11	1.4762524393008792e-8	71.16564417177914	46.571213262999244
CD8_TCM	DUSP2	VAF>=0.1	After	1.807545744187597	0.2936338379862138	931354	0.5967460531036958	6.370641692800066e-11	1.6459321683898103e-8	92.85714285714286	86.43702906350916
CD4_CTL	JUNB	VAF>=0.1	Before	2.3023208889722655	0.694786	304702	0.6833446214156601	2.4187784420196684e-11	1.647517952439306e-8	96.46017699115043	86.94880892042575
CD4_TEM	EIF1	VAF>=0.1	Before	2.6374229335941624	0.40557213785152557	105170	0.726566	2.3656515464866738e-11	1.688061353528705e-8	100	99.68911917098445
CD8_TCM	ZNF331	VAF>=0.1	Before	0.7018742030802233	0.33664137744129735	315729	0.6395936309861437	6.157503160365929e-11	1.9631954225124137e-8	59.285714285714285	35.47929665343165
CD8_Naive	NFKBIA	VAF>=0.1	After	1.1461771171353354	0.3577798454986827	745902	0.6079070904645477	1.2139356518596304e-10	1.9772636677300608e-8	71.33333333333334	68.16625916870416
MAIT	NFKBIZ	VAF>=0.1	Before	0.8978025531985262	0.6778411068418516	25217.5	0.7507889722519948	2.746631769000309e-11	2.0579138529234814e-8	66.66666666666666	24.330117899249732
MAIT	TRBV6-4	VAF>=0.1	Before	0.5177539263156165	0.42925503656429376	21443.5	0.6384274145528165	2.8995787615601723e-11	2.0690565591418657e-8	33.33333333333333	5.359056806002144
cDC	MTRNR2L12	VAF>=0.1	Before	2.2079938738817986	0.6512637616103456	68230.5	0.7372444569304577	3.1919652909692044e-11	2.2776952326273108e-8	98.52941176470588	85.89272593681116
Platelet	BEX3	VAF>=0.1	Before	1.1518848386423912	0.26437222207825495	2473376	0.5834834873089813	2.551899683412044e-10	2.3175888942987562e-8	67.9325	62.31689589623169
OTHER_T	HLA-DRB5	VAF>=0.1	After	1.1890128986945292	0.6689351707848292	49322	0.726659	1.5563272569385765e-12	2.3321563945224568e-8	88	45.30386740331492
CD4_CTL	H3F3B	VAF>=0.1	Before	2.397959770670282	0.3265145777216838	303866	0.6814686318395687	3.942258249105454e-11	2.4614474942852176e-8	99.11504424778761	99.31576279776989
Platelet	TAGLN2	VAF>=0.1	Before	2.995215313728508	0.2762691695642303	2.48327e+06	0.5858178921259869	2.7989563185252016e-10	2.511518588808392e-8	99.57805907172997	99.23962875992396
CD4_TEM	FOSB	VAF>=0.1	Before	1.1036948215948335	0.5712098317537806	102231	0.706259	3.886931069654584e-11	2.6475300944897245e-8	76	45.854922279792746
MAIT	JUN	VAF>=0.1	Before	3.297169586802202	1.599521538989812	27602.5	0.8217964749315232	4.013823291652939e-11	2.733961001155422e-8	94.44444444444444	76.7417
NK_CD56high	RHOB	VAF>=0.1	Before	0.40699455199581946	0.26768051083057043	68337.5	0.6397923454293525	6.168897804640345e-11	2.8012404121980473e-8	43.47826086956522	17.14039621016365
NK_CD56high	SERTAD1	VAF>=0.1	Before	0.6415774770653562	0.36897261067159115	71689.5	0.6711745871250421	6.484466461650766e-11	2.8579332331716685e-8	58.69565217391305	32.12747631352283
MAIT	CD69	VAF>=0.1	Before	2.598250431907737	1.285784440046481	27568.5	0.820784	4.4268546979156187e-11	2.8841920716637193e-8	97.22222222222221	82.7438
MAIT	NFKBIA	VAF>=0.1	Before	2.347847047890027	1.2853841161622932	27453	0.8173454805287603	4.65897237061324e-11	2.9089458739016414e-8	91.66666666666666	71.59699892818864
cDC	CXCR4	VAF>=0.1	After	0.9437036786200598	0.5398153647501713	41409	0.698603	1.3867755165527837e-11	2.968690159363352e-8	68.53932584269663	40.69069069069069
cDC	EIF1	VAF>=0.1	After	2.2169718060155645	0.30655985682846443	42557.5	0.7179792151702264	1.7255558969412107e-11	3.2321818894580055e-8	100	100
NK_CD56high	YWHAZ	VAF>=0.1	Before	1.6338486019780738	0.3681739345104664	74867	0.7009231172527431	8.015374822214245e-11	3.33639976974668e-8	98.91304347826086	92.85099052540913
CD8_TCM	DUSP1	VAF>=0.1	After	1.660181864832287	0.37255725865208866	927071	0.5940021272233328	1.451246837977318e-10	3.39795841673283e-8	80.23809523809524	71.34015069967707
Treg	RBM3	VAF>=0.1	Before	0.958371	0.27565094999052786	278765	0.6443913805299097	1.186277001980656e-10	3.4855609558196336e-8	85.88957055214725	69.3293
NK_CD56high	MATK	VAF>=0.1	Before	0.5667657200932907	-0.421774	32151.5	0.30101018612140956	8.70050676391481e-11	3.523705239385498e-8	58.69565217391305	83.29026701119724
CD8_TCM	GZMH	VAF>=0.1	After	1.3655572005687742	0.3050296840673892	925243	0.5928308729304423	1.5349044300543916e-10	3.538545059133086e-8	75.47619047619048	63.02475780409041
Treg	ACTG1	VAF>=0.1	Before	2.5968740076678465	0.3750626816603284	281037	0.6496433211127087	1.263503644330647e-10	3.641077328902836e-8	100	98.79427279577996
cDC	ZFP36	VAF>=0.1	After	2.3525403549569353	0.5512062513818499	42499.5	0.7170007085737423	2.448496159654376e-11	4.0767461058245355e-8	100	96.997
MAIT	KLF10	VAF>=0.1	Before	0.36110826094009896	0.29305315957628164	22379	0.6662796236751221	7.32891691497248e-11	4.3929527988345044e-8	41.66666666666667	8.788853161843516
CD8_TCM	KLF6	VAF>=0.1	After	1.4255310234546825	0.2652019157191794	926565	0.5936779178840536	1.949802557781431e-10	4.426938080053749e-8	86.19047619047619	80.62432723358451
Erythrocyte	SLC4A1	VAF>=0.1	After	0.19101746716111614	-0.465849	38224	0.31924365045559705	1.544170428234462e-11	4.6278787734186826e-8	12.149532710280374	49.597855227882036
CD4_Proliferating	MYBL2	VAF>=0.1	Before	0.42177746011878625	0.3310868380040376	10755.5	0.705741	6.490329881593929e-12	4.862879663784251e-8	52.5	11.286089238845145
Treg	BTG2	VAF>=0.1	Before	0.9978380135805353	0.3642538221725926	277113	0.6405726279582619	2.259787337492651e-10	6.156893318604976e-8	73.00613496932516	56.0663
CD4_Proliferating	CDT1	VAF>=0.1	Before	0.39725672879349316	0.3261323007715634	10277.5	0.6743766404199475	1.2875925391928666e-11	6.431524733268369e-8	42.5	7.349081364829396
NK_CD56high	DNAJA1	VAF>=0.1	Before	0.9417939454527476	0.4190810041490365	73501.5	0.6881389731490843	1.75405106013206e-10	6.739603881045876e-8	72.82608695652173	56.84754521963824
Treg	STK17B	VAF>=0.1	Before	0.9477346267279031	0.30542311593444693	277469	0.6413955552678906	2.581041189865609e-10	6.785421443883536e-8	80.3681	64.24265259984928
NK_CD56high	TNFAIP3	VAF>=0.1	Before	1.4728471151612492	0.5933752552855204	74071	0.6934707710744111	1.813138578983591e-10	6.792470401517277e-8	86.95652173913044	60.63738156761412
NK_Proliferating	TSC22D3	VAF>=0.1	After	1.4090868600085404	0.712022	23437.5	0.7395632829509956	4.208944709793047e-11	7.007892941805423e-8	82.08955223880598	57.082452431289646
NK_Proliferating	CD3D	VAF>=0.1	After	0.9482073873628502	0.6344888324223632	21856	0.68966	5.316744146217545e-11	7.242855548279083e-8	56.71641791044776	21.141649048625794
NK_Proliferating	CD3G	VAF>=0.1	After	0.6923399458260079	0.4581776464166198	21677	0.6840112334732258	5.166435053779135e-11	7.242855548279083e-8	55.223880597014926	19.027484143763214
CD4_TEM	JUNB	VAF>=0.1	Before	2.7076310507558876	0.7365317726948892	104018	0.7186044905008636	1.1759775162648952e-10	7.661749165751937e-8	92	92.84974093264249
CD4_CTL	HSP90AB1	VAF>=0.1	Before	1.4195651323332468	0.37937714584275417	299718	0.6721682985794958	2.2060835817654094e-10	1.1399366369915401e-7	94.69026548672566	83.47693867207299
Treg	KLF6	VAF>=0.1	Before	1.7291178181448903	0.4109995521519756	278617	0.6440492646820866	4.784263942615185e-10	1.1948699196681424e-7	92.63803680981594	85.38055764883195
MAIT	BTG2	VAF>=0.1	Before	1.4538332627569321	0.9112665133330866	26504	0.7890913421460045	2.2529201521717974e-10	1.298461864626707e-7	88.88888888888889	48.87459807073955
NK_CD56high	RPS2	VAF>=0.1	Before	1.5882380079163818	-0.505841	32492.5	0.3042027113058458	3.5864647610702255e-10	1.3108091327960326e-7	94.56521739130434	98.53574504737296
Treg	CXCR4	VAF>=0.1	Before	1.3814914719571045	0.45309507651387626	277403	0.641243	5.441785669158683e-10	1.3368058729892272e-7	79.14110429447852	66.05124340617935
Treg	DDX5	VAF>=0.1	Before	1.8464290661696818	0.32718855611170916	278286	0.6432852830084004	6.42596948093903e-10	1.528462740823355e-7	96.31901840490798	92.27581009796533
cDC	PLAUR	VAF>=0.1	Before	1.331940592290189	0.5803485553381644	66505.5	0.7186054803993603	3.169162109274707e-10	1.53193207120908e-7	86.76470588235294	63.77663482733284
cDC	GADD45B	VAF>=0.1	Before	1.2399543516212095	0.5463975068660099	66429.5	0.7177842849116134	3.1560173516321085e-10	1.53193207120908e-7	83.82352941176471	63.99706098457016
CD4_CTL	ZFP36	VAF>=0.1	Before	2.2020766821485886	0.7115055568807356	299715	0.6721604492507255	3.2688037421601985e-10	1.5379294764977634e-7	92.03539823008849	81.52559553978712
CD4_CTL	RPLP0	VAF>=0.1	Before	2.582528742052286	0.26529620698911494	299966	0.6727244795895025	3.2842004169455074e-10	1.5379294764977634e-7	100	99.94931576279778
OTHER_T	RAC1	VAF>=0.1	After	0.5607995063496299	0.3018511343302065	46777.5	0.689171	2.2353234245964205e-11	1.674816075878868e-7	70.66666666666667	27.624309392265197
Plasmablast	MYBL2	VAF>=0.1	Before	0.37954517292088547	0.29698551334372336	20706	0.6444444444444445	4.80720755031534e-11	1.8009001285368844e-7	37.03703703703704	8.235294117647058
cDC	MIDN	VAF>=0.1	Before	0.6124000567866961	0.3288289311377684	63931	0.6907874832519342	3.952127893562189e-10	1.850707390157169e-7	70.58823529411765	34.68038207200588
MAIT	IER2	VAF>=0.1	Before	2.302739917316394	1.2560016689846527	26984.5	0.8033970465642492	3.599573611540246e-10	1.9264146631760923e-7	97.22222222222221	76.63451232583066
cDC	IER2	VAF>=0.1	Before	1.405407371782017	0.5084957334178527	66583.5	0.7194482862946795	4.3676830044415154e-10	1.9833251461077607e-7	92.64705882352942	76.70830271858927
Treg	RPL38	VAF>=0.1	Before	1.282843237235919	-0.280486	154970	0.35822649918400745	9.051036866370772e-10	2.1192154287900938e-7	93.86503067484662	96.15674453654862
MAIT	ZFP36	VAF>=0.1	Before	2.7616447412731584	1.4103656686345083	26975	0.8031142074550435	4.2277583556602617e-10	2.1845847917092768e-7	94.44444444444444	74.59807073954984
CD8_Naive	RPS26	VAF>=0.1	Before	1.4486705487907587	-0.430869	553403	0.3943729119870472	4.2724123067731145e-9	2.530517723991902e-7	97.76119402985076	96.37127578304049
Treg	ICOS	VAF>=0.1	Before	0.6683638478384812	0.27343297015266127	270828	0.6260442623936089	1.1918717381235582e-9	2.626499705261988e-7	63.190184049079754	40.731
cDC	DUSP1	VAF>=0.1	After	2.247031161326853	0.5921438251611104	41930	0.7073927860444714	1.7689475028885027e-10	2.650767833078421e-7	97.75280898876404	92.7928
OTHER_T	TALDO1	VAF>=0.1	After	0.5083229792556903	0.2954142671181756	45997	0.6776721915285451	5.3490271332885967e-11	2.671839053077654e-7	61.33333333333333	24.41988950276243
NK_CD56high	KLF6	VAF>=0.1	Before	1.6044457774428629	0.554	73669.5	0.6897118301314459	7.674852696326996e-10	2.674596922196745e-7	93.47826086956522	75.88285960378983
Treg	MT-CO1	VAF>=0.1	Before	3.6156730592343735	0.2526224569501627	277494	0.6414521893102667	1.2571276310788836e-9	2.7301532683647927e-7	100	100
cDC	JUN	VAF>=0.1	Before	1.324151538653842	0.6455960350748426	65596.5	0.708784	6.784287555676473e-10	2.8239596950503315e-7	80.88235294117648	51.35929463629684
cDC	BHLHE40	VAF>=0.1	Before	1.0033683115530114	0.4700037405391909	65482	0.7075463543242425	6.7372782201302e-10	2.8239596950503315e-7	79.41176470588235	51.43277002204262
CD4_TEM	AC020916.1	VAF>=0.1	After	0.42990937511495125	0.2810550942037909	86179	0.624241	6.263350822324581e-11	3.1285437357511285e-7	39.473684210526315	16.184971098265898
OTHER_T	GNG5	VAF>=0.1	After	0.5860944394814416	0.3233855211781978	46790.5	0.6893627992633518	8.774245052575116e-11	3.2870515528209525e-7	69.33333333333334	32.15469613259668
CD4_CTL	FOSB	VAF>=0.1	Before	0.8510995899525018	0.44577305498518277	289412	0.6490553893491336	7.753929421014933e-10	3.3197894963973935e-7	60.17699115044248	39.20425747592498
MAIT	ATF3	VAF>=0.1	Before	0.5231863369696158	0.43382872443614184	22030.5	0.6559038942479457	7.265830896755113e-10	3.5122089028346894e-7	38.88888888888889	8.681672025723474
NK_CD56high	TEX14	VAF>=0.1	Before	0.7078808477978795	0.48866615666885893	68920.5	0.6452505336479047	1.0860878433845179e-9	3.6988696211629543e-7	46.73913043478261	23.60034453057709
CD4_CTL	JUNB	VAF>=0.1	After	1.7730190031064428	0.28231016432260025	849566	0.5903178086227598	2.6563364375858806e-9	3.720112291329385e-7	91.4573	86.11725663716814
MAIT	NR4A3	VAF>=0.1	Before	0.2953548272142207	0.2523903235162569	21088	0.6278432773609622	7.998426800544628e-10	3.745513300192539e-7	30.555555555555557	5.466237942122187
cDC	UBC	VAF>=0.1	Before	2.028896982154688	0.45529397130789473	66440	0.7178977395513679	9.836337991882122e-10	3.9837168867122593e-7	100	96.98750918442322
NK_CD56high	ARHGAP25	VAF>=0.1	After	0.6358702214227104	0.26822651736646475	159890	0.6497512983688098	3.497226328169803e-10	4.031225886740346e-7	72.22222222222221	44.70046082949309
NK_CD56high	EEF2	VAF>=0.1	After	1.8299670747237844	0.3197958398416003	163624	0.6649273807491933	3.920934199021114e-10	4.1967999265951e-7	100	95.23809523809523
NK_CD56high	EIF5	VAF>=0.1	Before	0.8645058134891752	0.3455987489093225	72464	0.6784256450586077	1.4123592795604771e-9	4.5030220860029253e-7	77.17391304347827	57.795004306632215
OTHER_T	PPP1R15A	VAF>=0.1	Before	1.1425520191348124	0.7010664377973341	22165	0.7607427237781439	3.0495422677527754e-11	4.5697390882275337e-7	91.66666666666666	40.85667215815486
CD4_CTL	IFRD1	VAF>=0.1	Before	0.42301983724273573	0.2516406724023341	276770	0.6207036138309658	1.2324646146079214e-9	4.860126907868343e-7	43.36283185840708	21.36340598073999
NK_CD56high	CCNL1	VAF>=0.1	Before	0.7845201100729782	0.3485808328368245	71996	0.6740441148934576	1.5773824772594117e-9	4.924390921194226e-7	75	50.301464254952634
CD4_CTL	DUSP2	VAF>=0.1	Before	1.5540028101187209	0.5875861672361802	295774	0.6633232263880977	1.315080753220174e-9	4.926621271751077e-7	82.30088495575221	65.94019260010137
cDC	IFI6	VAF>=0.1	After	1.0284027517330239	0.4665143790188777	40968.5	0.691172	4.4891604087134417e-10	4.973886226014755e-7	79.7753	49.549549549549546
cDC	FTH1	VAF>=0.1	After	3.7792342528697622	0.3061021845519041	41674.5	0.703082	4.6469407516988034e-10	4.973886226014755e-7	100	100
cDC	HLA-B	VAF>=0.1	After	2.7058170259487775	0.26261446752826423	41698.5	0.7034871950602287	4.0497987298746036e-10	4.973886226014755e-7	98.87640449438202	100
MAIT	GADD45B	VAF>=0.1	Before	1.2067227350770227	0.7332614772449733	26030	0.7749791592235322	1.1916188350881588e-9	5.411032801150321e-7	80.55555555555556	48.660235798499464
[truncated: 1,302 more rows]

## Sheet: supplementary file 1h
# Supplementary file 1h. Gene-Module annotation from WGCNA analysis
[truncated: 3,971 more rows]
